# Supplementary material for: Evidence for mitochondrial Lonp1 expression in the nucleus
Source: PubMed Central journal article supplement (PMC9237102; doi:10.1038/s41598-022-14860-0), 2022-06-27
Supplement: 41598_2022_14860_MOESM3_ESM.pdf [file 41598_2022_14860_MOESM3_ESM.pdf]

**Supplementary Table 1**

| Scramble siRNA - HS vs Ctrl |                                                                                   |       |      |         |           |
|-----------------------------|-----------------------------------------------------------------------------------|-------|------|---------|-----------|
| Category                    | Term                                                                              | Count | %    | P-Value | Benjamini |
| GOTERM_BP_DIRECT            | transcription. DNA-templated                                                      | 83    | 22.3 | 8.4E-15 | 1.6E-11   |
| GOTERM_BP_DIRECT            | response to unfolded protein                                                      | 14    | 3.8  | 1.6E-13 | 1.5E-10   |
| GOTERM_BP_DIRECT            | positive regulation of transcription from RNA polymerase II promoter              | 53    | 14.2 | 3.7E-13 | 2.4E-10   |
| GOTERM_BP_DIRECT            | regulation of transcription. DNA-templated                                        | 62    | 16.7 | 2.3E-10 | 9.7E-8    |
| GOTERM_BP_DIRECT            | negative regulation of transcription from RNA polymerase II promoter              | 40    | 10.8 | 2.5E-10 | 9.7E-8    |
| GOTERM_BP_DIRECT            | protein refolding                                                                 | 7     | 1.9  | 1.1E-7  | 3.6E-5    |
| GOTERM_BP_DIRECT            | regulation of cellular response to heat                                           | 11    | 3.0  | 6.4E-7  | 1.8E-4    |
| GOTERM_BP_DIRECT            | transcription from RNA polymerase II promoter                                     | 27    | 7.3  | 1.1E-6  | 2.6E-4    |
| GOTERM_BP_DIRECT            | skeletal muscle cell differentiation                                              | 9     | 2.4  | 1.8E-6  | 3.9E-4    |
| GOTERM_BP_DIRECT            | negative regulation of apoptotic process                                          | 21    | 5.6  | 1.4E-4  | 2.7E-2    |
| GOTERM_BP_DIRECT            | negative regulation of transcription. DNA-templated                               | 22    | 5.9  | 1.7E-4  | 3.1E-2    |
| GOTERM_BP_DIRECT            | reactive oxygen species metabolic process                                         | 6     | 1.6  | 3.2E-4  | 5.2E-2    |
| GOTERM_BP_DIRECT            | negative regulation of inclusion body assembly                                    | 4     | 1.1  | 5.6E-4  | 8.3E-2    |
| GOTERM_BP_DIRECT            | cellular response to vascular endothelial growth factor stimulus                  | 5     | 1.3  | 6.0E-4  | 8.3E-2    |
| GOTERM_BP_DIRECT            | regulation of transcription from RNA polymerase II promoter                       | 19    | 5.1  | 7.1E-4  | 8.6E-2    |
| GOTERM_BP_DIRECT            | regulation of cell death                                                          | 4     | 1.1  | 7.7E-4  | 8.6E-2    |
| GOTERM_BP_DIRECT            | positive regulation of apoptotic process                                          | 15    | 4.0  | 7.8E-4  | 8.6E-2    |
| GOTERM_BP_DIRECT            | response to hypoxia                                                               | 11    | 3.0  | 8.4E-4  | 8.6E-2    |
| GOTERM_BP_DIRECT            | thymus development                                                                | 6     | 1.6  | 8.5E-4  | 8.6E-2    |
| GOTERM_BP_DIRECT            | endoderm formation                                                                | 4     | 1.1  | 1.0E-3  | 9.6E-2    |
| GOTERM_BP_DIRECT            | cellular response to hormone stimulus                                             | 6     | 1.6  | 1.0E-3  | 9.6E-2    |
| GOTERM_BP_DIRECT            | protein folding                                                                   | 11    | 3.0  | 1.2E-3  | 1.0E-1    |
| GOTERM_BP_DIRECT            | cellular response to amino acid stimulus                                          | 6     | 1.6  | 1.3E-3  | 1.1E-1    |
| GOTERM_BP_DIRECT            | response to heat                                                                  | 6     | 1.6  | 1.4E-3  | 1.1E-1    |
| GOTERM_BP_DIRECT            | cellular heat acclimation                                                         | 3     | 0.8  | 1.8E-3  | 1.4E-1    |
| GOTERM_BP_DIRECT            | response to hydrogen peroxide                                                     | 6     | 1.6  | 1.8E-3  | 1.4E-1    |
| GOTERM_BP_DIRECT            | intrinsic apoptotic signaling pathway in response to endoplasmic reticulum stress | 5     | 1.3  | 2.4E-3  | 1.7E-1    |
| GOTERM_BP_DIRECT            | odontogenesis of dentin-containing tooth                                          | 6     | 1.6  | 2.6E-3  | 1.8E-1    |
| GOTERM_BP_DIRECT            | cellular response to extracellular stimulus                                       | 4     | 1.1  | 3.5E-3  | 2.2E-1    |
| GOTERM_BP_DIRECT            | response to mechanical stimulus                                                   | 6     | 1.6  | 3.5E-3  | 2.2E-1    |
| GOTERM_BP_DIRECT            | cellular response to heat                                                         | 5     | 1.3  | 3.7E-3  | 2.2E-1    |
| GOTERM_BP_DIRECT            | positive regulation of cell differentiation                                       | 5     | 1.3  | 3.7E-3  | 2.2E-1    |

|                  |                                                                                    |    |     |        |        |
|------------------|------------------------------------------------------------------------------------|----|-----|--------|--------|
| GOTERM_BP_DIRECT | negative regulation of sequence-specific DNA binding transcription factor activity | 6  | 1.6 | 3.8E-3 | 2.2E-1 |
| GOTERM_BP_DIRECT | positive regulation of transcription. DNA-templated                                | 19 | 5.1 | 3.9E-3 | 2.2E-1 |
| GOTERM_BP_DIRECT | positive regulation of osteoclast differentiation                                  | 4  | 1.1 | 4.1E-3 | 2.2E-1 |
| GOTERM_BP_DIRECT | cellular response to corticotropin-releasing hormone stimulus                      | 3  | 0.8 | 4.3E-3 | 2.3E-1 |
| GOTERM_BP_DIRECT | cell-cell signaling                                                                | 12 | 3.2 | 4.9E-3 | 2.5E-1 |
| GOTERM_BP_DIRECT | response to estrogen                                                               | 6  | 1.6 | 5.3E-3 | 2.7E-1 |
| GOTERM_BP_DIRECT | angiogenesis                                                                       | 11 | 3.0 | 5.6E-3 | 2.8E-1 |
| GOTERM_BP_DIRECT | response to insulin                                                                | 6  | 1.6 | 6.1E-3 | 2.9E-1 |
| GOTERM_BP_DIRECT | negative regulation of myoblast differentiation                                    | 4  | 1.1 | 7.1E-3 | 3.3E-1 |
| GOTERM_BP_DIRECT | cellular response to interleukin-1                                                 | 6  | 1.6 | 7.7E-3 | 3.4E-1 |
| GOTERM_BP_DIRECT | response to lipopolysaccharide                                                     | 9  | 2.4 | 7.9E-3 | 3.4E-1 |
| GOTERM_BP_DIRECT | peripheral nervous system development                                              | 4  | 1.1 | 8.0E-3 | 3.4E-1 |
| GOTERM_BP_DIRECT | response to cAMP                                                                   | 5  | 1.3 | 8.1E-3 | 3.4E-1 |
| GOTERM_BP_DIRECT | negative regulation of neuron apoptotic process                                    | 8  | 2.2 | 8.2E-3 | 3.4E-1 |
| GOTERM_BP_DIRECT | fat cell differentiation                                                           | 6  | 1.6 | 8.7E-3 | 3.6E-1 |
| GOTERM_BP_DIRECT | inactivation of MAPK activity                                                      | 4  | 1.1 | 8.9E-3 | 3.6E-1 |
| GOTERM_BP_DIRECT | regulation of mRNA stability                                                       | 7  | 1.9 | 9.1E-3 | 3.6E-1 |
| GOTERM_BP_DIRECT | protein stabilization                                                              | 8  | 2.2 | 9.6E-3 | 3.6E-1 |
| GOTERM_BP_DIRECT | multicellular organism development                                                 | 18 | 4.8 | 9.7E-3 | 3.6E-1 |
| GOTERM_BP_DIRECT | negative regulation of gene expression                                             | 8  | 2.2 | 9.9E-3 | 3.6E-1 |
| GOTERM_BP_DIRECT | positive regulation of cardiac muscle contraction                                  | 3  | 0.8 | 9.9E-3 | 3.6E-1 |
| GOTERM_BP_DIRECT | positive regulation of interleukin-8 production                                    | 4  | 1.1 | 1.0E-2 | 3.6E-1 |
| GOTERM_BP_DIRECT | cellular response to DNA damage stimulus                                           | 10 | 2.7 | 1.0E-2 | 3.7E-1 |
| GOTERM_BP_DIRECT | T cell differentiation in thymus                                                   | 4  | 1.1 | 1.1E-2 | 3.8E-1 |
| GOTERM_BP_DIRECT | cellular response to calcium ion                                                   | 5  | 1.3 | 1.2E-2 | 3.9E-1 |
| GOTERM_BP_DIRECT | embryonic hindlimb morphogenesis                                                   | 4  | 1.1 | 1.2E-2 | 3.9E-1 |
| GOTERM_BP_DIRECT | patterning of blood vessels                                                        | 4  | 1.1 | 1.2E-2 | 3.9E-1 |
| GOTERM_BP_DIRECT | cellular response to tumor necrosis factor                                         | 7  | 1.9 | 1.2E-2 | 3.9E-1 |
| GOTERM_BP_DIRECT | chaperone mediated protein folding requiring cofactor                              | 3  | 0.8 | 1.2E-2 | 3.9E-1 |
| GOTERM_BP_DIRECT | anterior/posterior pattern specification                                           | 6  | 1.6 | 1.3E-2 | 3.9E-1 |
| GOTERM_BP_DIRECT | cellular response to glucose starvation                                            | 4  | 1.1 | 1.3E-2 | 3.9E-1 |
| GOTERM_BP_DIRECT | regulation of RNA splicing                                                         | 4  | 1.1 | 1.3E-2 | 3.9E-1 |
| GOTERM_BP_DIRECT | negative regulation of Notch signaling pathway                                     | 4  | 1.1 | 1.3E-2 | 3.9E-1 |
| GOTERM_BP_DIRECT | ventricular septum morphogenesis                                                   | 4  | 1.1 | 1.3E-2 | 3.9E-1 |
| GOTERM_BP_DIRECT | cellular response to fibroblast growth factor stimulus                             | 4  | 1.1 | 1.5E-2 | 4.0E-1 |
| GOTERM_BP_DIRECT | protein localization to nucleus                                                    | 4  | 1.1 | 1.5E-2 | 4.0E-1 |
| GOTERM_BP_DIRECT | regulation of ossification                                                         | 3  | 0.8 | 1.5E-2 | 4.0E-1 |

|                  |                                                                                                                  |   |     |        |        |
|------------------|------------------------------------------------------------------------------------------------------------------|---|-----|--------|--------|
| GOTERM_BP_DIRECT | positive regulation of nuclear-transcribed mRNA poly(A) tail shortening                                          | 3 | 0.8 | 1.5E-2 | 4.0E-1 |
| GOTERM_BP_DIRECT | positive regulation of angiogenesis                                                                              | 7 | 1.9 | 1.5E-2 | 4.0E-1 |
| GOTERM_BP_DIRECT | negative regulation of cell death                                                                                | 5 | 1.3 | 1.5E-2 | 4.0E-1 |
| GOTERM_BP_DIRECT | determination of left/right symmetry                                                                             | 5 | 1.3 | 1.5E-2 | 4.0E-1 |
| GOTERM_BP_DIRECT | intrinsic apoptotic signaling pathway in response to DNA damage by p53 class mediator                            | 4 | 1.1 | 1.6E-2 | 4.2E-1 |
| GOTERM_BP_DIRECT | positive regulation of transcription from RNA polymerase II promoter in response to endoplasmic reticulum stress | 3 | 0.8 | 1.8E-2 | 4.4E-1 |
| GOTERM_BP_DIRECT | 3'-UTR-mediated mRNA destabilization                                                                             | 3 | 0.8 | 1.8E-2 | 4.4E-1 |
| GOTERM_BP_DIRECT | positive regulation of DNA damage response. signal transduction by p53 class mediator                            | 3 | 0.8 | 1.8E-2 | 4.4E-1 |
| GOTERM_BP_DIRECT | muscle organ development                                                                                         | 6 | 1.6 | 1.9E-2 | 4.8E-1 |
| GOTERM_BP_DIRECT | mitotic cell cycle arrest                                                                                        | 3 | 0.8 | 2.1E-2 | 4.9E-1 |
| GOTERM_BP_DIRECT | trophectodermal cell differentiation                                                                             | 3 | 0.8 | 2.1E-2 | 4.9E-1 |
| GOTERM_BP_DIRECT | left/right axis specification                                                                                    | 3 | 0.8 | 2.1E-2 | 4.9E-1 |
| GOTERM_BP_DIRECT | response to stress                                                                                               | 5 | 1.3 | 2.1E-2 | 5.0E-1 |
| GOTERM_BP_DIRECT | transforming growth factor beta receptor signaling pathway                                                       | 6 | 1.6 | 2.2E-2 | 5.1E-1 |
| GOTERM_BP_DIRECT | DNA damage response. signal transduction by p53 class mediator resulting in cell cycle arrest                    | 5 | 1.3 | 2.2E-2 | 5.2E-1 |
| GOTERM_BP_DIRECT | male gonad development                                                                                           | 6 | 1.6 | 2.4E-2 | 5.4E-1 |
| GOTERM_BP_DIRECT | spleen development                                                                                               | 4 | 1.1 | 2.4E-2 | 5.4E-1 |
| GOTERM_BP_DIRECT | neuron differentiation                                                                                           | 6 | 1.6 | 2.5E-2 | 5.4E-1 |
| GOTERM_BP_DIRECT | cellular response to oxidative stress                                                                            | 5 | 1.3 | 2.5E-2 | 5.4E-1 |
| GOTERM_BP_DIRECT | positive regulation of proteasomal ubiquitin-dependent protein catabolic process                                 | 5 | 1.3 | 2.5E-2 | 5.4E-1 |
| GOTERM_BP_DIRECT | cellular response to hypoxia                                                                                     | 6 | 1.6 | 2.6E-2 | 5.5E-1 |
| GOTERM_BP_DIRECT | negative regulation of T cell proliferation                                                                      | 4 | 1.1 | 2.6E-2 | 5.5E-1 |
| GOTERM_BP_DIRECT | erythrocyte development                                                                                          | 3 | 0.8 | 2.7E-2 | 5.7E-1 |
| GOTERM_BP_DIRECT | positive regulation of NF-kappaB transcription factor activity                                                   | 7 | 1.9 | 2.8E-2 | 5.9E-1 |
| GOTERM_BP_DIRECT | cell death                                                                                                       | 4 | 1.1 | 3.0E-2 | 6.0E-1 |
| GOTERM_BP_DIRECT | regulation of cyclin-dependent protein serine/threonine kinase activity                                          | 4 | 1.1 | 3.0E-2 | 6.0E-1 |
| GOTERM_BP_DIRECT | response to glucose                                                                                              | 5 | 1.3 | 3.0E-2 | 6.0E-1 |
| GOTERM_BP_DIRECT | positive regulation of p38MAPK cascade                                                                           | 3 | 0.8 | 3.1E-2 | 6.0E-1 |
| GOTERM_BP_DIRECT | regulation of protein ubiquitination                                                                             | 3 | 0.8 | 3.1E-2 | 6.0E-1 |
| GOTERM_BP_DIRECT | positive regulation of endothelial cell proliferation                                                            | 5 | 1.3 | 3.2E-2 | 6.1E-1 |
| GOTERM_BP_DIRECT | positive regulation of cysteine-type endopeptidase activity involved in apoptotic process                        | 4 | 1.1 | 3.2E-2 | 6.1E-1 |
| GOTERM_BP_DIRECT | regulation of apoptotic process                                                                                  | 9 | 2.4 | 3.2E-2 | 6.1E-1 |

|                  |                                                                                            |   |     |        |        |
|------------------|--------------------------------------------------------------------------------------------|---|-----|--------|--------|
| GOTERM_BP_DIRECT | negative regulation of protein ubiquitination                                              | 4 | 1.1 | 3.4E-2 | 6.1E-1 |
| GOTERM_BP_DIRECT | regulation of chloride transport                                                           | 2 | 0.5 | 3.4E-2 | 6.1E-1 |
| GOTERM_BP_DIRECT | positive regulation of mRNA endonucleolytic cleavage involved in unfolded protein response | 2 | 0.5 | 3.4E-2 | 6.1E-1 |
| GOTERM_BP_DIRECT | positive regulation of endoribonuclease activity                                           | 2 | 0.5 | 3.4E-2 | 6.1E-1 |
| GOTERM_BP_DIRECT | negative regulation of mast cell cytokine production                                       | 2 | 0.5 | 3.4E-2 | 6.1E-1 |
| GOTERM_BP_DIRECT | response to dsRNA                                                                          | 2 | 0.5 | 3.4E-2 | 6.1E-1 |
| GOTERM_BP_DIRECT | negative regulation of establishment of protein localization to mitochondrion              | 2 | 0.5 | 3.4E-2 | 6.1E-1 |
| GOTERM_BP_DIRECT | cellular response to mechanical stimulus                                                   | 5 | 1.3 | 3.5E-2 | 6.2E-1 |
| GOTERM_BP_DIRECT | cell cycle arrest                                                                          | 7 | 1.9 | 3.6E-2 | 6.4E-1 |
| GOTERM_BP_DIRECT | pharyngeal system development                                                              | 3 | 0.8 | 3.8E-2 | 6.5E-1 |
| GOTERM_BP_DIRECT | cell fate determination                                                                    | 3 | 0.8 | 3.8E-2 | 6.5E-1 |
| GOTERM_BP_DIRECT | response to corticosterone                                                                 | 3 | 0.8 | 3.8E-2 | 6.5E-1 |
| GOTERM_BP_DIRECT | response to activity                                                                       | 4 | 1.1 | 3.8E-2 | 6.5E-1 |
| GOTERM_BP_DIRECT | heart development                                                                          | 8 | 2.2 | 4.0E-2 | 6.7E-1 |
| GOTERM_BP_DIRECT | circadian rhythm                                                                           | 5 | 1.3 | 4.1E-2 | 6.9E-1 |
| GOTERM_BP_DIRECT | retinal ganglion cell axon guidance                                                        | 3 | 0.8 | 4.2E-2 | 6.9E-1 |
| GOTERM_BP_DIRECT | regulation of neurogenesis                                                                 | 3 | 0.8 | 4.2E-2 | 6.9E-1 |
| GOTERM_BP_DIRECT | palate development                                                                         | 5 | 1.3 | 4.3E-2 | 7.0E-1 |
| GOTERM_BP_DIRECT | positive regulation of endothelial cell migration                                          | 4 | 1.1 | 4.5E-2 | 7.1E-1 |
| GOTERM_BP_DIRECT | middle ear morphogenesis                                                                   | 3 | 0.8 | 4.6E-2 | 7.1E-1 |
| GOTERM_BP_DIRECT | cellular response to glucocorticoid stimulus                                               | 3 | 0.8 | 4.6E-2 | 7.1E-1 |
| GOTERM_BP_DIRECT | embryonic placenta development                                                             | 3 | 0.8 | 4.6E-2 | 7.1E-1 |
| GOTERM_BP_DIRECT | negative regulation of phosphorylation                                                     | 3 | 0.8 | 4.6E-2 | 7.1E-1 |
| GOTERM_BP_DIRECT | brain development                                                                          | 8 | 2.2 | 4.7E-2 | 7.1E-1 |
| GOTERM_BP_DIRECT | positive regulation of fat cell differentiation                                            | 4 | 1.1 | 4.8E-2 | 7.1E-1 |
| GOTERM_BP_DIRECT | cellular response to starvation                                                            | 4 | 1.1 | 4.8E-2 | 7.1E-1 |
| GOTERM_BP_DIRECT | negative regulation of inflammatory response                                               | 5 | 1.3 | 4.8E-2 | 7.1E-1 |
| GOTERM_BP_DIRECT | peptidyl-tyrosine phosphorylation                                                          | 7 | 1.9 | 5.1E-2 | 7.1E-1 |
| GOTERM_BP_DIRECT | cellular response to gamma radiation                                                       | 3 | 0.8 | 5.1E-2 | 7.1E-1 |
| GOTERM_BP_DIRECT | response to methionine                                                                     | 2 | 0.5 | 5.1E-2 | 7.1E-1 |
| GOTERM_BP_DIRECT | vascular smooth muscle cell differentiation                                                | 2 | 0.5 | 5.1E-2 | 7.1E-1 |
| GOTERM_BP_DIRECT | vitamin D receptor signaling pathway                                                       | 2 | 0.5 | 5.1E-2 | 7.1E-1 |
| GOTERM_BP_DIRECT | brain segmentation                                                                         | 2 | 0.5 | 5.1E-2 | 7.1E-1 |
| GOTERM_BP_DIRECT | negative regulation of tyrosine phosphorylation of Stat1 protein                           | 2 | 0.5 | 5.1E-2 | 7.1E-1 |
| GOTERM_BP_DIRECT | positive regulation of mast cell cytokine production                                       | 2 | 0.5 | 5.1E-2 | 7.1E-1 |
| GOTERM_BP_DIRECT | chaperone-mediated autophagy                                                               | 2 | 0.5 | 5.1E-2 | 7.1E-1 |

|                  |                                                                                                                                    |    |     |        |        |
|------------------|------------------------------------------------------------------------------------------------------------------------------------|----|-----|--------|--------|
| GOTERM_BP_DIRECT | positive regulation of nucleotide-binding oligomerization domain containing 2 signaling pathway                                    | 2  | 0.5 | 5.1E-2 | 7.1E-1 |
| GOTERM_BP_DIRECT | visceral motor neuron differentiation                                                                                              | 2  | 0.5 | 5.1E-2 | 7.1E-1 |
| GOTERM_BP_DIRECT | negative regulation of cell growth                                                                                                 | 6  | 1.6 | 5.9E-2 | 8.2E-1 |
| GOTERM_BP_DIRECT | regulation of growth                                                                                                               | 4  | 1.1 | 6.4E-2 | 8.6E-1 |
| GOTERM_BP_DIRECT | ionotropic glutamate receptor signaling pathway                                                                                    | 3  | 0.8 | 6.4E-2 | 8.6E-1 |
| GOTERM_BP_DIRECT | cellular response to nutrient                                                                                                      | 2  | 0.5 | 6.8E-2 | 8.6E-1 |
| GOTERM_BP_DIRECT | positive regulation of ureteric bud formation                                                                                      | 2  | 0.5 | 6.8E-2 | 8.6E-1 |
| GOTERM_BP_DIRECT | regulation of response to reactive oxygen species                                                                                  | 2  | 0.5 | 6.8E-2 | 8.6E-1 |
| GOTERM_BP_DIRECT | regulation of odontogenesis                                                                                                        | 2  | 0.5 | 6.8E-2 | 8.6E-1 |
| GOTERM_BP_DIRECT | gamma-delta T cell activation                                                                                                      | 2  | 0.5 | 6.8E-2 | 8.6E-1 |
| GOTERM_BP_DIRECT | positive regulation of cellular pH reduction                                                                                       | 2  | 0.5 | 6.8E-2 | 8.6E-1 |
| GOTERM_BP_DIRECT | negative regulation of RNA polymerase II regulatory region sequence-specific DNA binding                                           | 2  | 0.5 | 6.8E-2 | 8.6E-1 |
| GOTERM_BP_DIRECT | male sex differentiation                                                                                                           | 2  | 0.5 | 6.8E-2 | 8.6E-1 |
| GOTERM_BP_DIRECT | positive regulation of alpha-amino-3-hydroxy-5-methyl-4-isoxazole propionate selective glutamate receptor activity                 | 2  | 0.5 | 6.8E-2 | 8.6E-1 |
| GOTERM_BP_DIRECT | T-helper 2 cell differentiation                                                                                                    | 2  | 0.5 | 6.8E-2 | 8.6E-1 |
| GOTERM_BP_DIRECT | apoptotic process                                                                                                                  | 16 | 4.3 | 6.9E-2 | 8.7E-1 |
| GOTERM_BP_DIRECT | vasculogenesis                                                                                                                     | 4  | 1.1 | 7.3E-2 | 9.2E-1 |
| GOTERM_BP_DIRECT | adult behavior                                                                                                                     | 3  | 0.8 | 7.4E-2 | 9.2E-1 |
| GOTERM_BP_DIRECT | actin cytoskeleton organization                                                                                                    | 6  | 1.6 | 7.6E-2 | 9.4E-1 |
| GOTERM_BP_DIRECT | protein autophosphorylation                                                                                                        | 7  | 1.9 | 7.8E-2 | 9.6E-1 |
| GOTERM_BP_DIRECT | response to drug                                                                                                                   | 10 | 2.7 | 8.3E-2 | 9.7E-1 |
| GOTERM_BP_DIRECT | negative regulation of interleukin-2 biosynthetic process                                                                          | 2  | 0.5 | 8.4E-2 | 9.7E-1 |
| GOTERM_BP_DIRECT | positive regulation of endothelial cell chemotaxis                                                                                 | 2  | 0.5 | 8.4E-2 | 9.7E-1 |
| GOTERM_BP_DIRECT | organ formation                                                                                                                    | 2  | 0.5 | 8.4E-2 | 9.7E-1 |
| GOTERM_BP_DIRECT | positive regulation of endothelial cell chemotaxis by VEGF-activated vascular endothelial growth factor receptor signaling pathway | 2  | 0.5 | 8.4E-2 | 9.7E-1 |
| GOTERM_BP_DIRECT | negative regulation of muscle cell apoptotic process                                                                               | 2  | 0.5 | 8.4E-2 | 9.7E-1 |
| GOTERM_BP_DIRECT | negative regulation of protein homodimerization activity                                                                           | 2  | 0.5 | 8.4E-2 | 9.7E-1 |
| GOTERM_BP_DIRECT | ventricular septum development                                                                                                     | 3  | 0.8 | 8.4E-2 | 9.7E-1 |
| GOTERM_BP_DIRECT | RNA phosphodiester bond hydrolysis. exonucleolytic                                                                                 | 3  | 0.8 | 8.4E-2 | 9.7E-1 |
| GOTERM_BP_DIRECT | regulation of transcription from RNA polymerase II promoter in response to hypoxia                                                 | 3  | 0.8 | 8.4E-2 | 9.7E-1 |
| GOTERM_BP_DIRECT | positive regulation of smooth muscle cell proliferation                                                                            | 4  | 1.1 | 8.6E-2 | 9.9E-1 |
| GOTERM_BP_DIRECT | heart looping                                                                                                                      | 4  | 1.1 | 8.9E-2 | 1.0E0  |

|                  |                                                                                             |   |     |        |       |
|------------------|---------------------------------------------------------------------------------------------|---|-----|--------|-------|
| GOTERM_BP_DIRECT | nuclear-transcribed mRNA poly(A) tail shortening                                            | 3 | 0.8 | 9.0E-2 | 1.0E0 |
| GOTERM_BP_DIRECT | cell morphogenesis                                                                          | 4 | 1.1 | 9.3E-2 | 1.0E0 |
| GOTERM_BP_DIRECT | negative regulation of protein kinase activity                                              | 5 | 1.3 | 9.3E-2 | 1.0E0 |
| GOTERM_BP_DIRECT | cellular response to BMP stimulus                                                           | 3 | 0.8 | 9.5E-2 | 1.0E0 |
| GOTERM_BP_DIRECT | embryonic skeletal system development                                                       | 3 | 0.8 | 9.5E-2 | 1.0E0 |
| GOTERM_BP_DIRECT | intrinsic apoptotic signaling pathway                                                       | 3 | 0.8 | 9.5E-2 | 1.0E0 |
| GOTERM_BP_DIRECT | positive regulation of reactive oxygen species metabolic process                            | 3 | 0.8 | 9.5E-2 | 1.0E0 |
| GOTERM_BP_DIRECT | regulation of gene expression                                                               | 5 | 1.3 | 9.6E-2 | 1.0E0 |
| GOTERM_BP_DIRECT | embryonic process involved in female pregnancy                                              | 2 | 0.5 | 1.0E-1 | 1.0E0 |
| GOTERM_BP_DIRECT | regulation of transcription from RNA polymerase II promoter in response to oxidative stress | 2 | 0.5 | 1.0E-1 | 1.0E0 |
| GOTERM_BP_DIRECT | positive regulation of tumor necrosis factor-mediated signaling pathway                     | 2 | 0.5 | 1.0E-1 | 1.0E0 |
| GOTERM_BP_DIRECT | positive regulation of cell migration                                                       | 7 | 1.9 | 1.0E-1 | 1.0E0 |

| siLonp1 - HS vs Ctrl |                                                                                                                  |           |             |                |                |
|----------------------|------------------------------------------------------------------------------------------------------------------|-----------|-------------|----------------|----------------|
| Category             | Term                                                                                                             | Count     | %           | P-Value        | Benjamini      |
| GOTERM_BP_DIRECT     | <b>response to unfolded protein</b>                                                                              | <b>16</b> | <b>3.6</b>  | <b>1.3E-15</b> | <b>2.6E-12</b> |
| GOTERM_BP_DIRECT     | <b>transcription. DNA-templated</b>                                                                              | <b>88</b> | <b>20.0</b> | <b>1.8E-13</b> | <b>1.8E-10</b> |
| GOTERM_BP_DIRECT     | <b>regulation of transcription. DNA-templated</b>                                                                | <b>71</b> | <b>16.1</b> | <b>1.1E-11</b> | <b>7.1E-9</b>  |
| GOTERM_BP_DIRECT     | <b>negative regulation of transcription from RNA polymerase II promoter</b>                                      | <b>43</b> | <b>9.8</b>  | <b>3.9E-10</b> | <b>1.9E-7</b>  |
| GOTERM_BP_DIRECT     | <b>positive regulation of transcription from RNA polymerase II promoter</b>                                      | <b>46</b> | <b>10.5</b> | <b>1.4E-7</b>  | <b>5.5E-5</b>  |
| GOTERM_BP_DIRECT     | <b>protein refolding</b>                                                                                         | <b>7</b>  | <b>1.6</b>  | <b>2.5E-7</b>  | <b>7.3E-5</b>  |
| GOTERM_BP_DIRECT     | <b>regulation of cellular response to heat</b>                                                                   | <b>12</b> | <b>2.7</b>  | <b>2.6E-7</b>  | <b>7.3E-5</b>  |
| GOTERM_BP_DIRECT     | <b>negative regulation of inclusion body assembly</b>                                                            | <b>5</b>  | <b>1.1</b>  | <b>2.9E-5</b>  | <b>7.3E-3</b>  |
| GOTERM_BP_DIRECT     | <b>transcription from RNA polymerase II promoter</b>                                                             | <b>26</b> | <b>5.9</b>  | <b>3.7E-5</b>  | <b>8.1E-3</b>  |
| GOTERM_BP_DIRECT     | <b>skeletal muscle cell differentiation</b>                                                                      | <b>8</b>  | <b>1.8</b>  | <b>4.8E-5</b>  | <b>9.6E-3</b>  |
| GOTERM_BP_DIRECT     | <b>cellular response to vascular endothelial growth factor stimulus</b>                                          | <b>6</b>  | <b>1.4</b>  | <b>7.6E-5</b>  | <b>1.4E-2</b>  |
| GOTERM_BP_DIRECT     | <b>regulation of protein ubiquitination</b>                                                                      | <b>5</b>  | <b>1.1</b>  | <b>2.3E-4</b>  | <b>3.8E-2</b>  |
| GOTERM_BP_DIRECT     | <b>protein folding</b>                                                                                           | <b>13</b> | <b>3.0</b>  | <b>2.6E-4</b>  | <b>4.0E-2</b>  |
| GOTERM_BP_DIRECT     | <b>response to heat</b>                                                                                          | <b>7</b>  | <b>1.6</b>  | <b>3.6E-4</b>  | <b>5.1E-2</b>  |
| GOTERM_BP_DIRECT     | negative regulation of transcription. DNA-templated                                                              | 23        | 5.2         | 4.4E-4         | 5.8E-2         |
| GOTERM_BP_DIRECT     | regulation of cell death                                                                                         | 4         | 0.9         | 1.1E-3         | 1.4E-1         |
| GOTERM_BP_DIRECT     | response to methionine                                                                                           | 3         | 0.7         | 1.2E-3         | 1.4E-1         |
| GOTERM_BP_DIRECT     | PERK-mediated unfolded protein response                                                                          | 4         | 0.9         | 1.5E-3         | 1.5E-1         |
| GOTERM_BP_DIRECT     | positive regulation of transcription from RNA polymerase II promoter in response to endoplasmic reticulum stress | 4         | 0.9         | 1.5E-3         | 1.5E-1         |

|                  |                                                                                                                                    |    |     |        |        |
|------------------|------------------------------------------------------------------------------------------------------------------------------------|----|-----|--------|--------|
| GOTERM_BP_DIRECT | endoderm formation                                                                                                                 | 4  | 0.9 | 1.5E-3 | 1.5E-1 |
| GOTERM_BP_DIRECT | positive regulation of transcription. DNA-templated                                                                                | 22 | 5.0 | 1.6E-3 | 1.5E-1 |
| GOTERM_BP_DIRECT | multicellular organism development                                                                                                 | 22 | 5.0 | 1.8E-3 | 1.6E-1 |
| GOTERM_BP_DIRECT | negative regulation of apoptotic process                                                                                           | 20 | 4.5 | 2.0E-3 | 1.6E-1 |
| GOTERM_BP_DIRECT | positive regulation of angiogenesis                                                                                                | 9  | 2.0 | 2.1E-3 | 1.6E-1 |
| GOTERM_BP_DIRECT | response to insulin                                                                                                                | 7  | 1.6 | 2.1E-3 | 1.6E-1 |
| GOTERM_BP_DIRECT | patterning of blood vessels                                                                                                        | 5  | 1.1 | 2.2E-3 | 1.6E-1 |
| GOTERM_BP_DIRECT | cellular heat acclimation                                                                                                          | 3  | 0.7 | 2.3E-3 | 1.7E-1 |
| GOTERM_BP_DIRECT | protein localization to nucleus                                                                                                    | 5  | 1.1 | 2.8E-3 | 1.9E-1 |
| GOTERM_BP_DIRECT | cellular response to fibroblast growth factor stimulus                                                                             | 5  | 1.1 | 2.8E-3 | 1.9E-1 |
| GOTERM_BP_DIRECT | cellular response to interleukin-1                                                                                                 | 7  | 1.6 | 2.9E-3 | 1.9E-1 |
| GOTERM_BP_DIRECT | negative regulation of cell growth                                                                                                 | 9  | 2.0 | 2.9E-3 | 1.9E-1 |
| GOTERM_BP_DIRECT | positive regulation of endothelial cell chemotaxis by VEGF-activated vascular endothelial growth factor receptor signaling pathway | 3  | 0.7 | 3.8E-3 | 2.4E-1 |
| GOTERM_BP_DIRECT | odontogenesis of dentin-containing tooth                                                                                           | 6  | 1.4 | 4.7E-3 | 2.8E-1 |
| GOTERM_BP_DIRECT | response to cold                                                                                                                   | 5  | 1.1 | 5.5E-3 | 3.2E-1 |
| GOTERM_BP_DIRECT | response to lipopolysaccharide                                                                                                     | 10 | 2.3 | 5.6E-3 | 3.2E-1 |
| GOTERM_BP_DIRECT | protein stabilization                                                                                                              | 9  | 2.0 | 5.9E-3 | 3.2E-1 |
| GOTERM_BP_DIRECT | positive regulation of osteoclast differentiation                                                                                  | 4  | 0.9 | 6.0E-3 | 3.2E-1 |
| GOTERM_BP_DIRECT | cellular response to tumor necrosis factor                                                                                         | 8  | 1.8 | 6.4E-3 | 3.4E-1 |
| GOTERM_BP_DIRECT | regulation of transcription from RNA polymerase II promoter                                                                        | 18 | 4.1 | 7.4E-3 | 3.8E-1 |
| GOTERM_BP_DIRECT | transforming growth factor beta receptor signaling pathway                                                                         | 7  | 1.6 | 1.0E-2 | 5.0E-1 |
| GOTERM_BP_DIRECT | negative regulation of myoblast differentiation                                                                                    | 4  | 0.9 | 1.0E-2 | 5.0E-1 |
| GOTERM_BP_DIRECT | regulation of apoptotic process                                                                                                    | 11 | 2.5 | 1.0E-2 | 5.0E-1 |
| GOTERM_BP_DIRECT | protein ubiquitination involved in ubiquitin-dependent protein catabolic process                                                   | 9  | 2.0 | 1.2E-2 | 5.1E-1 |
| GOTERM_BP_DIRECT | neuron differentiation                                                                                                             | 7  | 1.6 | 1.2E-2 | 5.1E-1 |
| GOTERM_BP_DIRECT | positive regulation of endothelial cell proliferation                                                                              | 6  | 1.4 | 1.2E-2 | 5.1E-1 |
| GOTERM_BP_DIRECT | negative regulation of cysteine-type endopeptidase activity involved in apoptotic process                                          | 6  | 1.4 | 1.2E-2 | 5.1E-1 |
| GOTERM_BP_DIRECT | cellular response to hormone stimulus                                                                                              | 5  | 1.1 | 1.2E-2 | 5.1E-1 |
| GOTERM_BP_DIRECT | endothelial cell chemotaxis                                                                                                        | 3  | 0.7 | 1.3E-2 | 5.2E-1 |
| GOTERM_BP_DIRECT | inactivation of MAPK activity                                                                                                      | 4  | 0.9 | 1.3E-2 | 5.2E-1 |
| GOTERM_BP_DIRECT | forebrain development                                                                                                              | 5  | 1.1 | 1.3E-2 | 5.2E-1 |
| GOTERM_BP_DIRECT | organ regeneration                                                                                                                 | 5  | 1.1 | 1.4E-2 | 5.3E-1 |
| GOTERM_BP_DIRECT | cellular response to amino acid stimulus                                                                                           | 5  | 1.1 | 1.4E-2 | 5.3E-1 |
| GOTERM_BP_DIRECT | positive regulation of interleukin-8 production                                                                                    | 4  | 0.9 | 1.4E-2 | 5.3E-1 |
| GOTERM_BP_DIRECT | actin cytoskeleton organization                                                                                                    | 8  | 1.8 | 1.5E-2 | 5.3E-1 |

|                  |                                                                                               |    |     |        |        |
|------------------|-----------------------------------------------------------------------------------------------|----|-----|--------|--------|
| GOTERM_BP_DIRECT | chaperone mediated protein folding requiring cofactor                                         | 3  | 0.7 | 1.6E-2 | 5.3E-1 |
| GOTERM_BP_DIRECT | T cell differentiation in thymus                                                              | 4  | 0.9 | 1.6E-2 | 5.3E-1 |
| GOTERM_BP_DIRECT | JNK cascade                                                                                   | 5  | 1.1 | 1.6E-2 | 5.3E-1 |
| GOTERM_BP_DIRECT | negative regulation of neuron apoptotic process                                               | 8  | 1.8 | 1.6E-2 | 5.3E-1 |
| GOTERM_BP_DIRECT | circadian rhythm                                                                              | 6  | 1.4 | 1.7E-2 | 5.3E-1 |
| GOTERM_BP_DIRECT | response to endoplasmic reticulum stress                                                      | 6  | 1.4 | 1.7E-2 | 5.3E-1 |
| GOTERM_BP_DIRECT | regulation of mRNA stability                                                                  | 7  | 1.6 | 1.7E-2 | 5.3E-1 |
| GOTERM_BP_DIRECT | positive regulation of NF-kappaB transcription factor activity                                | 8  | 1.8 | 1.7E-2 | 5.3E-1 |
| GOTERM_BP_DIRECT | positive regulation of apoptotic process                                                      | 13 | 3.0 | 1.7E-2 | 5.3E-1 |
| GOTERM_BP_DIRECT | palate development                                                                            | 6  | 1.4 | 1.8E-2 | 5.3E-1 |
| GOTERM_BP_DIRECT | regulation of transcription from RNA polymerase II promoter in response to hypoxia            | 4  | 0.9 | 1.8E-2 | 5.3E-1 |
| GOTERM_BP_DIRECT | embryonic hindlimb morphogenesis                                                              | 4  | 0.9 | 1.8E-2 | 5.3E-1 |
| GOTERM_BP_DIRECT | response to hydrogen peroxide                                                                 | 5  | 1.1 | 1.8E-2 | 5.4E-1 |
| GOTERM_BP_DIRECT | regulation of ossification                                                                    | 3  | 0.7 | 1.9E-2 | 5.4E-1 |
| GOTERM_BP_DIRECT | negative regulation of Notch signaling pathway                                                | 4  | 0.9 | 1.9E-2 | 5.4E-1 |
| GOTERM_BP_DIRECT | regulation of RNA splicing                                                                    | 4  | 0.9 | 1.9E-2 | 5.4E-1 |
| GOTERM_BP_DIRECT | ventricular septum morphogenesis                                                              | 4  | 0.9 | 1.9E-2 | 5.4E-1 |
| GOTERM_BP_DIRECT | anterior/posterior pattern specification                                                      | 6  | 1.4 | 2.2E-2 | 6.0E-1 |
| GOTERM_BP_DIRECT | response to hypoxia                                                                           | 9  | 2.0 | 2.2E-2 | 6.0E-1 |
| GOTERM_BP_DIRECT | positive regulation of ATPase activity                                                        | 4  | 0.9 | 2.3E-2 | 6.2E-1 |
| GOTERM_BP_DIRECT | cellular response to DNA damage stimulus                                                      | 10 | 2.3 | 2.4E-2 | 6.3E-1 |
| GOTERM_BP_DIRECT | brown fat cell differentiation                                                                | 4  | 0.9 | 2.5E-2 | 6.6E-1 |
| GOTERM_BP_DIRECT | cellular response to lipopolysaccharide                                                       | 7  | 1.6 | 2.5E-2 | 6.6E-1 |
| GOTERM_BP_DIRECT | MyD88-independent toll-like receptor signaling pathway                                        | 3  | 0.7 | 2.7E-2 | 6.7E-1 |
| GOTERM_BP_DIRECT | chaperone-mediated protein complex assembly                                                   | 3  | 0.7 | 2.7E-2 | 6.7E-1 |
| GOTERM_BP_DIRECT | intrinsic apoptotic signaling pathway in response to endoplasmic reticulum stress             | 4  | 0.9 | 2.7E-2 | 6.8E-1 |
| GOTERM_BP_DIRECT | I-kappaB kinase/NF-kappaB signaling                                                           | 5  | 1.1 | 3.1E-2 | 7.7E-1 |
| GOTERM_BP_DIRECT | response to starvation                                                                        | 4  | 0.9 | 3.2E-2 | 7.7E-1 |
| GOTERM_BP_DIRECT | muscle organ development                                                                      | 6  | 1.4 | 3.2E-2 | 7.7E-1 |
| GOTERM_BP_DIRECT | response to stress                                                                            | 5  | 1.1 | 3.3E-2 | 7.8E-1 |
| GOTERM_BP_DIRECT | DNA damage response. signal transduction by p53 class mediator resulting in cell cycle arrest | 5  | 1.1 | 3.5E-2 | 7.9E-1 |
| GOTERM_BP_DIRECT | angiogenesis                                                                                  | 10 | 2.3 | 3.5E-2 | 7.9E-1 |
| GOTERM_BP_DIRECT | induction of positive chemotaxis                                                              | 3  | 0.7 | 3.5E-2 | 7.9E-1 |
| GOTERM_BP_DIRECT | cell migration involved in sprouting angiogenesis                                             | 3  | 0.7 | 3.5E-2 | 7.9E-1 |
| GOTERM_BP_DIRECT | negative regulation of T cell proliferation                                                   | 4  | 0.9 | 3.7E-2 | 8.0E-1 |

|                  |                                                                                                   |    |     |        |        |
|------------------|---------------------------------------------------------------------------------------------------|----|-----|--------|--------|
| GOTERM_BP_DIRECT | cellular response to heat                                                                         | 4  | 0.9 | 3.7E-2 | 8.0E-1 |
| GOTERM_BP_DIRECT | negative regulation of transforming growth factor beta receptor signaling pathway                 | 5  | 1.1 | 3.8E-2 | 8.0E-1 |
| GOTERM_BP_DIRECT | cellular response to oxidative stress                                                             | 5  | 1.1 | 3.8E-2 | 8.0E-1 |
| GOTERM_BP_DIRECT | negative regulation of establishment of protein localization to mitochondrion                     | 2  | 0.5 | 3.9E-2 | 8.0E-1 |
| GOTERM_BP_DIRECT | positive regulation of mRNA endonucleolytic cleavage involved in unfolded protein response        | 2  | 0.5 | 3.9E-2 | 8.0E-1 |
| GOTERM_BP_DIRECT | positive regulation of endoribonuclease activity                                                  | 2  | 0.5 | 3.9E-2 | 8.0E-1 |
| GOTERM_BP_DIRECT | positive regulation of p38MAPK cascade                                                            | 3  | 0.7 | 3.9E-2 | 8.0E-1 |
| GOTERM_BP_DIRECT | intermediate filament organization                                                                | 3  | 0.7 | 3.9E-2 | 8.0E-1 |
| GOTERM_BP_DIRECT | ERBB2 signaling pathway                                                                           | 4  | 0.9 | 3.9E-2 | 8.0E-1 |
| GOTERM_BP_DIRECT | response to progesterone                                                                          | 4  | 0.9 | 4.2E-2 | 8.4E-1 |
| GOTERM_BP_DIRECT | blood vessel morphogenesis                                                                        | 3  | 0.7 | 4.4E-2 | 8.8E-1 |
| GOTERM_BP_DIRECT | response to glucose                                                                               | 5  | 1.1 | 4.6E-2 | 9.1E-1 |
| GOTERM_BP_DIRECT | negative regulation of protein ubiquitination                                                     | 4  | 0.9 | 4.8E-2 | 9.3E-1 |
| GOTERM_BP_DIRECT | response to corticosterone                                                                        | 3  | 0.7 | 4.9E-2 | 9.4E-1 |
| GOTERM_BP_DIRECT | regulation of gene expression                                                                     | 6  | 1.4 | 4.9E-2 | 9.4E-1 |
| GOTERM_BP_DIRECT | thymus development                                                                                | 4  | 0.9 | 5.4E-2 | 9.5E-1 |
| GOTERM_BP_DIRECT | response to activity                                                                              | 4  | 0.9 | 5.4E-2 | 9.5E-1 |
| GOTERM_BP_DIRECT | negative regulation of endoplasmic reticulum stress-induced intrinsic apoptotic signaling pathway | 3  | 0.7 | 5.4E-2 | 9.5E-1 |
| GOTERM_BP_DIRECT | positive regulation of blood vessel endothelial cell migration                                    | 3  | 0.7 | 5.4E-2 | 9.5E-1 |
| GOTERM_BP_DIRECT | retinal ganglion cell axon guidance                                                               | 3  | 0.7 | 5.4E-2 | 9.5E-1 |
| GOTERM_BP_DIRECT | regulation of neurogenesis                                                                        | 3  | 0.7 | 5.4E-2 | 9.5E-1 |
| GOTERM_BP_DIRECT | vascular endothelial growth factor receptor signaling pathway                                     | 5  | 1.1 | 5.5E-2 | 9.5E-1 |
| GOTERM_BP_DIRECT | protein autophosphorylation                                                                       | 8  | 1.8 | 5.7E-2 | 9.5E-1 |
| GOTERM_BP_DIRECT | fat cell differentiation                                                                          | 5  | 1.1 | 5.7E-2 | 9.5E-1 |
| GOTERM_BP_DIRECT | small GTPase mediated signal transduction                                                         | 10 | 2.3 | 5.8E-2 | 9.5E-1 |
| GOTERM_BP_DIRECT | visceral motor neuron differentiation                                                             | 2  | 0.5 | 5.8E-2 | 9.5E-1 |
| GOTERM_BP_DIRECT | cellular response to ionomycin                                                                    | 2  | 0.5 | 5.8E-2 | 9.5E-1 |
| GOTERM_BP_DIRECT | brain segmentation                                                                                | 2  | 0.5 | 5.8E-2 | 9.5E-1 |
| GOTERM_BP_DIRECT | chaperone-mediated autophagy                                                                      | 2  | 0.5 | 5.8E-2 | 9.5E-1 |
| GOTERM_BP_DIRECT | positive regulation of mast cell cytokine production                                              | 2  | 0.5 | 5.8E-2 | 9.5E-1 |
| GOTERM_BP_DIRECT | positive regulation of nucleotide-binding oligomerization domain containing 2 signaling pathway   | 2  | 0.5 | 5.8E-2 | 9.5E-1 |
| GOTERM_BP_DIRECT | positive regulation of intrinsic apoptotic signaling pathway by p53 class mediator                | 2  | 0.5 | 5.8E-2 | 9.5E-1 |
| GOTERM_BP_DIRECT | neuron migration                                                                                  | 6  | 1.4 | 5.9E-2 | 9.5E-1 |
| GOTERM_BP_DIRECT | middle ear morphogenesis                                                                          | 3  | 0.7 | 5.9E-2 | 9.5E-1 |

|                  |                                                                                                                    |    |     |        |        |
|------------------|--------------------------------------------------------------------------------------------------------------------|----|-----|--------|--------|
| GOTERM_BP_DIRECT | cellular response to glucocorticoid stimulus                                                                       | 3  | 0.7 | 5.9E-2 | 9.5E-1 |
| GOTERM_BP_DIRECT | positive regulation of interferon-gamma production                                                                 | 4  | 0.9 | 6.3E-2 | 9.9E-1 |
| GOTERM_BP_DIRECT | outflow tract morphogenesis                                                                                        | 4  | 0.9 | 6.3E-2 | 9.9E-1 |
| GOTERM_BP_DIRECT | positive regulation of endothelial cell migration                                                                  | 4  | 0.9 | 6.3E-2 | 9.9E-1 |
| GOTERM_BP_DIRECT | stress-activated MAPK cascade                                                                                      | 3  | 0.7 | 6.5E-2 | 1.0E0  |
| GOTERM_BP_DIRECT | cellular response to gamma radiation                                                                               | 3  | 0.7 | 6.5E-2 | 1.0E0  |
| GOTERM_BP_DIRECT | cellular response to starvation                                                                                    | 4  | 0.9 | 6.7E-2 | 1.0E0  |
| GOTERM_BP_DIRECT | positive regulation of fat cell differentiation                                                                    | 4  | 0.9 | 6.7E-2 | 1.0E0  |
| GOTERM_BP_DIRECT | xenobiotic metabolic process                                                                                       | 5  | 1.1 | 7.0E-2 | 1.0E0  |
| GOTERM_BP_DIRECT | negative regulation of cyclin-dependent protein serine/threonine kinase activity                                   | 3  | 0.7 | 7.0E-2 | 1.0E0  |
| GOTERM_BP_DIRECT | inflammatory response                                                                                              | 13 | 3.0 | 7.5E-2 | 1.0E0  |
| GOTERM_BP_DIRECT | negative regulation of peptidyl-serine phosphorylation                                                             | 3  | 0.7 | 7.6E-2 | 1.0E0  |
| GOTERM_BP_DIRECT | regulation of odontogenesis                                                                                        | 2  | 0.5 | 7.7E-2 | 1.0E0  |
| GOTERM_BP_DIRECT | male sex differentiation                                                                                           | 2  | 0.5 | 7.7E-2 | 1.0E0  |
| GOTERM_BP_DIRECT | negative regulation of RNA polymerase II regulatory region sequence-specific DNA binding                           | 2  | 0.5 | 7.7E-2 | 1.0E0  |
| GOTERM_BP_DIRECT | positive regulation of alpha-amino-3-hydroxy-5-methyl-4-isoxazole propionate selective glutamate receptor activity | 2  | 0.5 | 7.7E-2 | 1.0E0  |
| GOTERM_BP_DIRECT | gamma-delta T cell activation                                                                                      | 2  | 0.5 | 7.7E-2 | 1.0E0  |
| GOTERM_BP_DIRECT | regulation of response to reactive oxygen species                                                                  | 2  | 0.5 | 7.7E-2 | 1.0E0  |
| GOTERM_BP_DIRECT | in utero embryonic development                                                                                     | 8  | 1.8 | 8.1E-2 | 1.0E0  |
| GOTERM_BP_DIRECT | cellular response to calcium ion                                                                                   | 4  | 0.9 | 8.1E-2 | 1.0E0  |
| GOTERM_BP_DIRECT | ionotropic glutamate receptor signaling pathway                                                                    | 3  | 0.7 | 8.2E-2 | 1.0E0  |
| GOTERM_BP_DIRECT | peripheral nervous system development                                                                              | 3  | 0.7 | 8.2E-2 | 1.0E0  |
| GOTERM_BP_DIRECT | peptidyl-tyrosine phosphorylation                                                                                  | 7  | 1.6 | 8.5E-2 | 1.0E0  |
| GOTERM_BP_DIRECT | brain development                                                                                                  | 8  | 1.8 | 8.6E-2 | 1.0E0  |
| GOTERM_BP_DIRECT | ventricular cardiac muscle tissue morphogenesis                                                                    | 3  | 0.7 | 8.8E-2 | 1.0E0  |
| GOTERM_BP_DIRECT | adult behavior                                                                                                     | 3  | 0.7 | 9.4E-2 | 1.0E0  |
| GOTERM_BP_DIRECT | glycogen biosynthetic process                                                                                      | 3  | 0.7 | 9.4E-2 | 1.0E0  |
| GOTERM_BP_DIRECT | apoptotic nuclear changes                                                                                          | 2  | 0.5 | 9.6E-2 | 1.0E0  |
| GOTERM_BP_DIRECT | protein import into mitochondrial outer membrane                                                                   | 2  | 0.5 | 9.6E-2 | 1.0E0  |
| GOTERM_BP_DIRECT | positive regulation of endothelial cell chemotaxis                                                                 | 2  | 0.5 | 9.6E-2 | 1.0E0  |
| GOTERM_BP_DIRECT | positive regulation of histone deacetylase activity                                                                | 2  | 0.5 | 9.6E-2 | 1.0E0  |
| GOTERM_BP_DIRECT | negative regulation of protein homodimerization activity                                                           | 2  | 0.5 | 9.6E-2 | 1.0E0  |
| GOTERM_BP_DIRECT | organ formation                                                                                                    | 2  | 0.5 | 9.6E-2 | 1.0E0  |
| GOTERM_BP_DIRECT | cellular response to fructose stimulus                                                                             | 2  | 0.5 | 9.6E-2 | 1.0E0  |

|                  |                                                              |   |     |        |       |
|------------------|--------------------------------------------------------------|---|-----|--------|-------|
| GOTERM_BP_DIRECT | negative regulation of interleukin-2<br>biosynthetic process | 2 | 0.5 | 9.6E-2 | 1.0E0 |
|------------------|--------------------------------------------------------------|---|-----|--------|-------|
