# Supplementary material for: Evidence for mitochondrial Lonp1 expression in the nucleus
Source: PubMed Central journal article supplement (PMC9237102; doi:10.1038/s41598-022-14860-0), 2022-06-27
Supplement: 41598_2022_14860_MOESM4_ESM.pdf [file 41598_2022_14860_MOESM4_ESM.pdf]

**Supplementary Table 2**

| HS vs Ctrl Scramble                                                                                           |                |                 |                  |             |                      |                 |                 |
|---------------------------------------------------------------------------------------------------------------|----------------|-----------------|------------------|-------------|----------------------|-----------------|-----------------|
| Term                                                                                                          | Overlap        | P-value         | Adjusted P-value | Old P-value | Old Adjusted P-value | Odds Ratio      | Combined Score  |
| <b>Attenuation phase Homo sapiens R-HSA-3371568</b>                                                           | <b>12/26</b>   | <b>1.25E-14</b> | <b>8.13E-12</b>  | <b>0</b>    | <b>0</b>             | <b>46.17739</b> | <b>1478.384</b> |
| <b>HSF1-dependent transactivation Homo sapiens R-HSA-3371571</b>                                              | <b>12/34</b>   | <b>6.18E-13</b> | <b>2.02E-10</b>  | <b>0</b>    | <b>0</b>             | <b>29.37363</b> | <b>825.7373</b> |
| <b>HSF1 activation Homo sapiens R-HSA-3371511</b>                                                             | <b>11/29</b>   | <b>2.29E-12</b> | <b>4.98E-10</b>  | <b>0</b>    | <b>0</b>             | <b>32.82588</b> | <b>879.8154</b> |
| <b>Regulation of HSF1-mediated heat shock response Homo sapiens R-HSA-3371453</b>                             | <b>14/80</b>   | <b>2.65E-10</b> | <b>4.20E-08</b>  | <b>0</b>    | <b>0</b>             | <b>11.46041</b> | <b>252.6976</b> |
| <b>Cellular response to heat stress Homo sapiens R-HSA-3371556</b>                                            | <b>15/96</b>   | <b>3.22E-10</b> | <b>4.20E-08</b>  | <b>0</b>    | <b>0</b>             | <b>10.02514</b> | <b>219.1085</b> |
| <b>Generic Transcription Pathway Homo sapiens R-HSA-212436</b>                                                | <b>43/812</b>  | <b>9.73E-10</b> | <b>1.06E-07</b>  | <b>0</b>    | <b>0</b>             | <b>3.166098</b> | <b>65.69711</b> |
| <b>Cellular responses to stress Homo sapiens R-HSA-2262752</b>                                                | <b>24/367</b>  | <b>1.37E-07</b> | <b>1.28E-05</b>  | <b>0</b>    | <b>0</b>             | <b>3.832693</b> | <b>60.56399</b> |
| <b>Gene Expression Homo sapiens R-HSA-74160</b>                                                               | <b>54/1631</b> | <b>3.22E-05</b> | <b>0.002628</b>  | <b>0</b>    | <b>0</b>             | <b>1.91916</b>  | <b>19.8481</b>  |
| RAF-independent MAPK1/3 activation Homo sapiens R-HSA-112409                                                  | 4/23           | 8.20E-04        | 0.057112         | 0           | 0                    | 11.09508        | 78.84095        |
| Negative regulation of MAPK pathway Homo sapiens R-HSA-5675221                                                | 5/40           | 8.76E-04        | 0.057112         | 0           | 0                    | 7.542934        | 53.10378        |
| Developmental Biology Homo sapiens R-HSA-1266738                                                              | 27/786         | 0.002001        | 0.111746         | 0           | 0                    | 1.922885        | 11.9491         |
| Receptor-ligand binding initiates the second proteolytic cleavage of Notch receptor Homo sapiens R-HSA-156988 | 3/14           | 0.002057        | 0.111746         | 0           | 0                    | 14.34048        | 88.71977        |
| Constitutive Signaling by NOTCH1 HD Domain Mutants Homo sapiens R-HSA-2691232                                 | 3/15           | 0.002535        | 0.11807          | 0           | 0                    | 13.14477        | 78.57242        |
| Signaling by NOTCH1 HD Domain Mutants in Cancer Homo sapiens R-HSA-2691230                                    | 3/15           | 0.002535        | 0.11807          | 0           | 0                    | 13.14477        | 78.57242        |
| SMAD2/SMAD3:SMAD4 heterotrimer regulates transcription Homo sapiens R-HSA-2173796                             | 4/32           | 0.002916        | 0.126748         | 0           | 0                    | 7.525346        | 43.92956        |

|                                                                                                             |        |          |          |   |   |              |          |
|-------------------------------------------------------------------------------------------------------------|--------|----------|----------|---|---|--------------|----------|
| Senescence-Associated Secretary Phenotype (SASP) Homo sapiens R-HSA-2559582                                 | 6/77   | 0.003276 | 0.133479 | 0 | 0 | 4.4658<br>55 | 25.55033 |
| Scavenging by Class F Receptors Homo sapiens R-HSA-3000484                                                  | 2/6    | 0.005029 | 0.182178 | 0 | 0 | 26.229<br>95 | 138.8205 |
| Uptake and function of diphtheria toxin Homo sapiens R-HSA-5336415                                          | 2/6    | 0.005029 | 0.182178 | 0 | 0 | 26.229<br>95 | 138.8205 |
| NOTCH2 Activation and Transmission of Signal to the Nucleus Homo sapiens R-HSA-2979096                      | 3/21   | 0.006818 | 0.215906 | 0 | 0 | 8.7605       | 43.6992  |
| Signaling by NOTCH1 t(7;9)(NOTCH1:M1580 K2555) Translocation Mutant Homo sapiens R-HSA-2660825              | 2/7    | 0.006954 | 0.215906 | 0 | 0 | 20.982<br>89 | 104.2521 |
| Constitutive Signaling by NOTCH1 t(7;9)(NOTCH1:M1580 K2555) Translocation Mutant Homo sapiens R-HSA-2660826 | 2/7    | 0.006954 | 0.215906 | 0 | 0 | 20.982<br>89 | 104.2521 |
| MAPK family signaling cascades Homo sapiens R-HSA-5683057                                                   | 12/284 | 0.007782 | 0.230619 | 0 | 0 | 2.3455<br>07 | 11.38976 |
| Transcriptional activity of SMAD2/SMAD3:SMAD4 heterotrimer Homo sapiens R-HSA-2173793                       | 4/44   | 0.00923  | 0.261656 | 0 | 0 | 5.2645<br>16 | 24.6657  |
| Signaling by TGF-beta Receptor Complex Homo sapiens R-HSA-170834                                            | 5/73   | 0.012098 | 0.290601 | 0 | 0 | 3.8758<br>52 | 17.11064 |
| Downregulation of TGF-beta receptor signaling Homo sapiens R-HSA-2173788                                    | 3/26   | 0.012438 | 0.290601 | 0 | 0 | 6.8542<br>95 | 30.06971 |
| Regulation of Hypoxia-inducible Factor (HIF) by oxygen Homo sapiens R-HSA-1234174                           | 3/26   | 0.012438 | 0.290601 | 0 | 0 | 6.8542<br>95 | 30.06971 |
| Cellular response to hypoxia Homo sapiens R-HSA-2262749                                                     | 3/26   | 0.012438 | 0.290601 | 0 | 0 | 6.8542<br>95 | 30.06971 |
| TP53 Regulates Transcription of Cell Cycle Genes Homo sapiens R-HSA-6791312                                 | 4/48   | 0.01248  | 0.290601 | 0 | 0 | 4.7849<br>46 | 20.9755  |
| POU5F1 (OCT4). SOX2. NANOG repress genes related to differentiation Homo sapiens R-HSA-2892245              | 2/10   | 0.014356 | 0.312006 | 0 | 0 | 13.112<br>3  | 55.64309 |
| Regulation of gene expression by Hypoxia-inducible Factor                                                   | 2/10   | 0.014356 | 0.312006 | 0 | 0 | 13.112<br>3  | 55.64309 |

|                                                                                               |        |          |          |   |   |              |          |
|-----------------------------------------------------------------------------------------------|--------|----------|----------|---|---|--------------|----------|
| Homo sapiens R-HSA-1234158                                                                    |        |          |          |   |   |              |          |
| Transcriptional Regulation by TP53 Homo sapiens R-HSA-3700989                                 | 13/348 | 0.015013 | 0.313871 | 0 | 0 | 2.0620<br>62 | 8.658324 |
| Signaling by Leptin Homo sapiens R-HSA-2586552                                                | 10/243 | 0.017062 | 0.313871 | 0 | 0 | 2.2738<br>57 | 9.256648 |
| Signaling by NOTCH3 Homo sapiens R-HSA-1980148                                                | 2/11   | 0.01733  | 0.313871 | 0 | 0 | 11.654<br>78 | 47.26361 |
| Signaling by NOTCH4 Homo sapiens R-HSA-1980150                                                | 2/11   | 0.01733  | 0.313871 | 0 | 0 | 11.654<br>78 | 47.26361 |
| Membrane binding and targetting of GAG proteins Homo sapiens R-HSA-174490                     | 2/11   | 0.01733  | 0.313871 | 0 | 0 | 11.654<br>78 | 47.26361 |
| Synthesis And Processing Of GAG. GAGPOL Polyproteins Homo sapiens R-HSA-174495                | 2/11   | 0.01733  | 0.313871 | 0 | 0 | 11.654<br>78 | 47.26361 |
| Activated NOTCH1 Transmits Signal to the Nucleus Homo sapiens R-HSA-2122948                   | 3/30   | 0.018382 | 0.318935 | 0 | 0 | 5.8376<br>53 | 23.32934 |
| AUF1 (hnRNP D0) binds and destabilizes mRNA Homo sapiens R-HSA-450408                         | 4/54   | 0.018588 | 0.318935 | 0 | 0 | 4.2094<br>62 | 16.77566 |
| Reversible hydration of carbon dioxide Homo sapiens R-HSA-1475029                             | 2/12   | 0.020541 | 0.325244 | 0 | 0 | 10.488<br>77 | 40.75249 |
| Signaling by SCF-KIT Homo sapiens R-HSA-1433557                                               | 12/325 | 0.020609 | 0.325244 | 0 | 0 | 2.0339<br>5  | 7.895881 |
| TGF-beta receptor signaling activates SMADs Homo sapiens R-HSA-2173789                        | 3/32   | 0.02185  | 0.325244 | 0 | 0 | 5.4345<br>01 | 20.7792  |
| Signaling by NOTCH2 Homo sapiens R-HSA-1980145                                                | 3/32   | 0.02185  | 0.325244 | 0 | 0 | 5.4345<br>01 | 20.7792  |
| Oncogene Induced Senescence Homo sapiens R-HSA-2559585                                        | 3/32   | 0.02185  | 0.325244 | 0 | 0 | 5.4345<br>01 | 20.7792  |
| Signaling by VEGF Homo sapiens R-HSA-194138                                                   | 12/328 | 0.021949 | 0.325244 | 0 | 0 | 2.0143<br>27 | 7.692787 |
| Regulation of mRNA stability by proteins that bind AU-rich elements Homo sapiens R-HSA-450531 | 5/86   | 0.023069 | 0.334243 | 0 | 0 | 3.2516<br>39 | 12.2563  |
| Assembly Of The HIV Virion Homo sapiens R-HSA-175474                                          | 2/13   | 0.023977 | 0.339855 | 0 | 0 | 9.5347<br>59 | 35.57075 |
| Regulation of IFNG signaling Homo sapiens R-HSA-877312                                        | 2/14   | 0.027631 | 0.378425 | 0 | 0 | 8.7397<br>5  | 31.36537 |
| NCAM signaling for neurite out-growth Homo sapiens R-HSA-375165                               | 10/266 | 0.029548 | 0.378425 | 0 | 0 | 2.0671<br>11 | 7.27984  |
| Cellular Senescence Homo sapiens R-HSA-2559583                                                | 7/161  | 0.032818 | 0.378425 | 0 | 0 | 2.3983<br>74 | 8.194713 |

|                                                                                         |        |          |          |   |   |              |          |
|-----------------------------------------------------------------------------------------|--------|----------|----------|---|---|--------------|----------|
| GRB2 events in EGFR signaling Homo sapiens R-HSA-179812                                 | 9/235  | 0.034216 | 0.378425 | 0 | 0 | 2.1048<br>68 | 7.104062 |
| SHC1 events in EGFR signaling Homo sapiens R-HSA-180336                                 | 9/235  | 0.034216 | 0.378425 | 0 | 0 | 2.1048<br>68 | 7.104062 |
| SOS-mediated signalling Homo sapiens R-HSA-112412                                       | 9/235  | 0.034216 | 0.378425 | 0 | 0 | 2.1048<br>68 | 7.104062 |
| SHC1 events in ERBB4 signaling Homo sapiens R-HSA-1250347                               | 9/235  | 0.034216 | 0.378425 | 0 | 0 | 2.1048<br>68 | 7.104062 |
| RAF/MAP kinase cascade Homo sapiens R-HSA-5673001                                       | 9/235  | 0.034216 | 0.378425 | 0 | 0 | 2.1048<br>68 | 7.104062 |
| G1 Phase Homo sapiens R-HSA-69236                                                       | 3/38   | 0.034237 | 0.378425 | 0 | 0 | 4.5014<br>94 | 15.19001 |
| Cyclin D associated events in G1 Homo sapiens R-HSA-69231                               | 3/38   | 0.034237 | 0.378425 | 0 | 0 | 4.5014<br>94 | 15.19001 |
| FRS-mediated FGFR2 signaling Homo sapiens R-HSA-5654700                                 | 9/236  | 0.03501  | 0.378425 | 0 | 0 | 2.0954<br>88 | 7.024327 |
| FRS-mediated FGFR4 signaling Homo sapiens R-HSA-5654712                                 | 9/236  | 0.03501  | 0.378425 | 0 | 0 | 2.0954<br>88 | 7.024327 |
| FRS-mediated FGFR3 signaling Homo sapiens R-HSA-5654706                                 | 9/236  | 0.03501  | 0.378425 | 0 | 0 | 2.0954<br>88 | 7.024327 |
| FRS-mediated FGFR1 signaling Homo sapiens R-HSA-5654693                                 | 9/236  | 0.03501  | 0.378425 | 0 | 0 | 2.0954<br>88 | 7.024327 |
| Fc epsilon receptor (FCERI) signaling Homo sapiens R-HSA-2454202                        | 13/395 | 0.036958 | 0.378425 | 0 | 0 | 1.8039<br>46 | 5.94936  |
| Signaling by PTK6 Homo sapiens R-HSA-8848021                                            | 4/67   | 0.037338 | 0.378425 | 0 | 0 | 3.3386<br>24 | 10.97653 |
| ARMS-mediated activation Homo sapiens R-HSA-170984                                      | 9/239  | 0.037468 | 0.378425 | 0 | 0 | 2.0678<br>36 | 6.79132  |
| Signalling to p38 via RIT and RIN Homo sapiens R-HSA-187706                             | 9/239  | 0.037468 | 0.378425 | 0 | 0 | 2.0678<br>36 | 6.79132  |
| Frs2-mediated activation Homo sapiens R-HSA-170968                                      | 9/240  | 0.038313 | 0.378425 | 0 | 0 | 2.0587<br>78 | 6.715661 |
| MAPK1/MAPK3 signaling Homo sapiens R-HSA-5684996                                        | 9/241  | 0.039171 | 0.378425 | 0 | 0 | 2.0497<br>98 | 6.640981 |
| Unblocking of NMDA receptor. glutamate binding and activation Homo sapiens R-HSA-438066 | 2/17   | 0.0398   | 0.378425 | 0 | 0 | 6.9907<br>31 | 22.53734 |
| Prolonged ERK activation events Homo sapiens R-HSA-169893                               | 9/242  | 0.040042 | 0.378425 | 0 | 0 | 2.0408<br>95 | 6.567265 |

|                                                                                                        |        |          |          |   |   |              |          |
|--------------------------------------------------------------------------------------------------------|--------|----------|----------|---|---|--------------|----------|
| VEGFA-VEGFR2 Pathway<br>Homo sapiens R-HSA-4420097                                                     | 11/320 | 0.040404 | 0.378425 | 0 | 0 | 1.8838<br>05 | 6.044797 |
| Interleukin receptor SHC signaling<br>Homo sapiens R-HSA-912526                                        | 9/245  | 0.042733 | 0.378425 | 0 | 0 | 2.0146<br>4  | 6.351746 |
| Signalling to RAS<br>Homo sapiens R-HSA-167044                                                         | 9/246  | 0.043656 | 0.378425 | 0 | 0 | 2.0060<br>36 | 6.281734 |
| Transcriptional regulation of pluripotent stem cells<br>Homo sapiens R-HSA-452723                      | 3/42   | 0.044126 | 0.378425 | 0 | 0 | 4.0389<br>77 | 12.60444 |
| Oxygen-dependent proline hydroxylation of Hypoxia-inducible Factor Alpha<br>Homo sapiens R-HSA-1234176 | 2/18   | 0.04423  | 0.378425 | 0 | 0 | 6.5534<br>76 | 20.43607 |
| VEGFR2 mediated cell proliferation<br>Homo sapiens R-HSA-5218921                                       | 9/248  | 0.045543 | 0.378425 | 0 | 0 | 1.9890<br>44 | 6.144369 |
| FCERI mediated MAPK activation<br>Homo sapiens R-HSA-2871796                                           | 10/289 | 0.047444 | 0.378425 | 0 | 0 | 1.8944<br>51 | 5.774678 |
| Downstream signaling of activated FGFR2<br>Homo sapiens R-HSA-5654696                                  | 11/329 | 0.047627 | 0.378425 | 0 | 0 | 1.8296<br>37 | 5.570058 |
| Downstream signaling of activated FGFR4<br>Homo sapiens R-HSA-5654716                                  | 11/329 | 0.047627 | 0.378425 | 0 | 0 | 1.8296<br>37 | 5.570058 |
| Downstream signaling of activated FGFR3<br>Homo sapiens R-HSA-5654708                                  | 11/329 | 0.047627 | 0.378425 | 0 | 0 | 1.8296<br>37 | 5.570058 |
| Signaling by ERBB4<br>Homo sapiens R-HSA-1236394                                                       | 11/330 | 0.048481 | 0.378425 | 0 | 0 | 1.8238<br>07 | 5.519918 |
| Regulation of TP53 Activity through Methylation<br>Homo sapiens R-HSA-6804760                          | 2/19   | 0.048833 | 0.378425 | 0 | 0 | 6.1676<br>63 | 18.62238 |
| Constitutive Signaling by Ligand-Responsive EGFR Cancer Variants<br>Homo sapiens R-HSA-1236382         | 2/19   | 0.048833 | 0.378425 | 0 | 0 | 6.1676<br>63 | 18.62238 |
| Signaling by Ligand-Responsive EGFR Variants in Cancer<br>Homo sapiens R-HSA-5637815                   | 2/19   | 0.048833 | 0.378425 | 0 | 0 | 6.1676<br>63 | 18.62238 |
| Signaling by EGFR in Cancer<br>Homo sapiens R-HSA-1643713                                              | 2/19   | 0.048833 | 0.378425 | 0 | 0 | 6.1676<br>63 | 18.62238 |
| Interleukin-2 signaling<br>Homo sapiens R-HSA-451927                                                   | 9/252  | 0.049478 | 0.378425 | 0 | 0 | 1.9558<br>99 | 5.879891 |
| Signaling by FGFR4<br>Homo sapiens R-HSA-5654743                                                       | 11/332 | 0.050219 | 0.378425 | 0 | 0 | 1.8122<br>56 | 5.42113  |

|                                                                                                                                             |        |          |          |   |   |              |          |
|---------------------------------------------------------------------------------------------------------------------------------------------|--------|----------|----------|---|---|--------------|----------|
| Downstream signaling of activated FGFR1 Homo sapiens R-HSA-5654687                                                                          | 11/332 | 0.050219 | 0.378425 | 0 | 0 | 1.8122<br>56 | 5.42113  |
| Signalling to ERKs Homo sapiens R-HSA-187687                                                                                                | 9/253  | 0.050495 | 0.378425 | 0 | 0 | 1.9477<br>82 | 5.815832 |
| Signaling by FGFR3 Homo sapiens R-HSA-5654741                                                                                               | 11/333 | 0.051103 | 0.378628 | 0 | 0 | 1.8065<br>35 | 5.37247  |
| Signaling by ERBB2 Homo sapiens R-HSA-1227986                                                                                               | 3/45   | 0.052372 | 0.383667 | 0 | 0 | 3.7499<br>04 | 11.05992 |
| Regulation of gene expression in beta cells Homo sapiens R-HSA-210745                                                                       | 2/20   | 0.0536   | 0.38561  | 0 | 0 | 5.8247<br>18 | 17.04432 |
| Signaling by FGFR1 Homo sapiens R-HSA-5654736                                                                                               | 11/336 | 0.05382  | 0.38561  | 0 | 0 | 1.7895<br>81 | 5.229359 |
| TP53 regulates transcription of additional cell cycle genes whose exact role in the p53 pathway remain uncertain Homo sapiens R-HSA-6804115 | 2/21   | 0.058524 | 0.405848 | 0 | 0 | 5.5178<br>72 | 15.66143 |
| Aflatoxin activation and detoxification Homo sapiens R-HSA-5423646                                                                          | 2/21   | 0.058524 | 0.405848 | 0 | 0 | 5.5178<br>72 | 15.66143 |
| Downstream signal transduction Homo sapiens R-HSA-186763                                                                                    | 11/341 | 0.058559 | 0.405848 | 0 | 0 | 1.7620<br>09 | 5.000076 |
| Interleukin-3. 5 and GM-CSF signaling Homo sapiens R-HSA-512988                                                                             | 9/261  | 0.059134 | 0.405848 | 0 | 0 | 1.8851<br>69 | 5.331152 |
| DAP12 signaling Homo sapiens R-HSA-2424491                                                                                                  | 11/344 | 0.061532 | 0.414359 | 0 | 0 | 1.7458<br>64 | 4.867816 |
| Transcriptional regulation of white adipocyte differentiation Homo sapiens R-HSA-381340                                                     | 4/79   | 0.061645 | 0.414359 | 0 | 0 | 2.8027<br>24 | 7.809386 |
| Axon guidance Homo sapiens R-HSA-422475                                                                                                     | 15/515 | 0.063552 | 0.41885  | 0 | 0 | 1.5892<br>52 | 4.379807 |
| SALM protein interactions at the synapse Homo sapiens R-HSA-8849932                                                                         | 2/22   | 0.063598 | 0.41885  | 0 | 0 | 5.2417<br>11 | 14.44179 |
| Signaling by Interleukins Homo sapiens R-HSA-449147                                                                                         | 12/392 | 0.067994 | 0.443321 | 0 | 0 | 1.6695<br>2  | 4.48823  |
| Signaling by BMP Homo sapiens R-HSA-201451                                                                                                  | 2/23   | 0.068814 | 0.444227 | 0 | 0 | 4.9918<br>51 | 13.35991 |
| Nuclear Receptor transcription pathway Homo sapiens R-HSA-383280                                                                            | 3/51   | 0.070891 | 0.447543 | 0 | 0 | 3.2801<br>61 | 8.681303 |
| Signaling by EGFR Homo sapiens R-HSA-177929                                                                                                 | 11/355 | 0.07327  | 0.447543 | 0 | 0 | 1.6890<br>73 | 4.414566 |
| Growth hormone receptor signaling Homo sapiens R-HSA-982772                                                                                 | 2/24   | 0.074165 | 0.447543 | 0 | 0 | 4.7647<br>06 | 12.39519 |

|                                                                                    |        |          |          |   |   |              |          |
|------------------------------------------------------------------------------------|--------|----------|----------|---|---|--------------|----------|
| DAP12 interactions Homo sapiens R-HSA-2172127                                      | 11/359 | 0.077869 | 0.447543 | 0 | 0 | 1.6693<br>12 | 4.261291 |
| Cytokine Signaling in Immune system Homo sapiens R-HSA-1280215                     | 17/620 | 0.078441 | 0.447543 | 0 | 0 | 1.4937<br>25 | 3.802144 |
| PI3K/AKT Signaling in Cancer Homo sapiens R-HSA-2219528                            | 4/86   | 0.078883 | 0.447543 | 0 | 0 | 2.5625<br>49 | 6.508343 |
| ATF4 activates genes Homo sapiens R-HSA-380994                                     | 2/25   | 0.079644 | 0.447543 | 0 | 0 | 4.5573<br>12 | 11.53084 |
| Constitutive Signaling by AKT1 E17K in Cancer Homo sapiens R-HSA-5674400           | 2/25   | 0.079644 | 0.447543 | 0 | 0 | 4.5573<br>12 | 11.53084 |
| Regulation of IFNA signaling Homo sapiens R-HSA-912694                             | 2/25   | 0.079644 | 0.447543 | 0 | 0 | 4.5573<br>12 | 11.53084 |
| Budding and maturation of HIV virion Homo sapiens R-HSA-162588                     | 2/25   | 0.079644 | 0.447543 | 0 | 0 | 4.5573<br>12 | 11.53084 |
| Signaling by FGFR2 Homo sapiens R-HSA-5654738                                      | 11/361 | 0.080236 | 0.447543 | 0 | 0 | 1.6596<br>01 | 4.18682  |
| Signaling by PDGF Homo sapiens R-HSA-186797                                        | 11/364 | 0.083869 | 0.447543 | 0 | 0 | 1.6452<br>4  | 4.077733 |
| Signaling by FGFR Homo sapiens R-HSA-190236                                        | 11/366 | 0.086347 | 0.447543 | 0 | 0 | 1.6358<br>02 | 4.00671  |
| IRS-mediated signalling Homo sapiens R-HSA-112399                                  | 9/284  | 0.089015 | 0.447543 | 0 | 0 | 1.7254<br>5  | 4.173773 |
| Abacavir metabolism Homo sapiens R-HSA-2161541                                     | 1/5    | 0.09054  | 0.447543 | 0 | 0 | 13.08        | 31.41771 |
| Na+-dependent glucose transporters Homo sapiens R-HSA-428808                       | 1/5    | 0.09054  | 0.447543 | 0 | 0 | 13.08        | 31.41771 |
| The fatty acid cycling model Homo sapiens R-HSA-167826                             | 1/5    | 0.09054  | 0.447543 | 0 | 0 | 13.08        | 31.41771 |
| The proton buffering model Homo sapiens R-HSA-167827                               | 1/5    | 0.09054  | 0.447543 | 0 | 0 | 13.08        | 31.41771 |
| Mitochondrial Uncoupling Proteins Homo sapiens R-HSA-166187                        | 1/5    | 0.09054  | 0.447543 | 0 | 0 | 13.08        | 31.41771 |
| PTK6 Expression Homo sapiens R-HSA-8849473                                         | 1/5    | 0.09054  | 0.447543 | 0 | 0 | 13.08        | 31.41771 |
| Uptake and actions of bacterial toxins Homo sapiens R-HSA-5339562                  | 2/27   | 0.09096  | 0.447543 | 0 | 0 | 4.1922<br>99 | 10.05033 |
| Constitutive Signaling by NOTCH1 HD+PEST Domain Mutants Homo sapiens R-HSA-2894862 | 3/57   | 0.091919 | 0.447543 | 0 | 0 | 2.9148<br>05 | 6.95718  |
| Signaling by NOTCH1 in Cancer Homo sapiens R-HSA-2644603                           | 3/57   | 0.091919 | 0.447543 | 0 | 0 | 2.9148<br>05 | 6.95718  |
| Signaling by NOTCH1 PEST Domain Mutants in Cancer                                  | 3/57   | 0.091919 | 0.447543 | 0 | 0 | 2.9148<br>05 | 6.95718  |

|                                                                                              |        |          |          |   |   |          |          |
|----------------------------------------------------------------------------------------------|--------|----------|----------|---|---|----------|----------|
| Homo sapiens R-HSA-2644602                                                                   |        |          |          |   |   |          |          |
| Constitutive Signaling by NOTCH1 PEST Domain Mutants Homo sapiens R-HSA-2644606              | 3/57   | 0.091919 | 0.447543 | 0 | 0 | 2.914805 | 6.95718  |
| Signaling by NOTCH1 HD+PEST Domain Mutants in Cancer Homo sapiens R-HSA-2894858              | 3/57   | 0.091919 | 0.447543 | 0 | 0 | 2.914805 | 6.95718  |
| Oxidative Stress Induced Senescence Homo sapiens R-HSA-2559580                               | 4/91   | 0.092509 | 0.447543 | 0 | 0 | 2.414658 | 5.747983 |
| Insulin receptor signalling cascade Homo sapiens R-HSA-74751                                 | 9/287  | 0.093471 | 0.447543 | 0 | 0 | 1.706565 | 4.044737 |
| Diseases of signal transduction Homo sapiens R-HSA-5663202                                   | 9/288  | 0.094985 | 0.447543 | 0 | 0 | 1.70036  | 4.002713 |
| IGF1R signaling cascade Homo sapiens R-HSA-2428924                                           | 9/288  | 0.094985 | 0.447543 | 0 | 0 | 1.70036  | 4.002713 |
| Signaling by Type 1 Insulin-like Growth Factor 1 Receptor (IGF1R) Homo sapiens R-HSA-2404192 | 9/288  | 0.094985 | 0.447543 | 0 | 0 | 1.70036  | 4.002713 |
| IRS-related events triggered by IGF1R Homo sapiens R-HSA-2428928                             | 9/288  | 0.094985 | 0.447543 | 0 | 0 | 1.70036  | 4.002713 |
| MAPK6/MAPK4 signaling Homo sapiens R-HSA-5687128                                             | 4/92   | 0.09536  | 0.447543 | 0 | 0 | 2.387097 | 5.609908 |
| MyD88:Mal cascade initiated on plasma membrane Homo sapiens R-HSA-166058                     | 4/92   | 0.09536  | 0.447543 | 0 | 0 | 2.387097 | 5.609908 |
| Toll Like Receptor TLR1:TLR2 Cascade Homo sapiens R-HSA-168179                               | 4/92   | 0.09536  | 0.447543 | 0 | 0 | 2.387097 | 5.609908 |
| Toll Like Receptor TLR6:TLR2 Cascade Homo sapiens R-HSA-168188                               | 4/92   | 0.09536  | 0.447543 | 0 | 0 | 2.387097 | 5.609908 |
| Toll Like Receptor 2 (TLR2) Cascade Homo sapiens R-HSA-181438                                | 4/92   | 0.09536  | 0.447543 | 0 | 0 | 2.387097 | 5.609908 |
| NGF signalling via TRKA from the plasma membrane Homo sapiens R-HSA-187037                   | 11/374 | 0.096705 | 0.447543 | 0 | 0 | 1.599087 | 3.735612 |
| PERK regulates gene expression Homo sapiens R-HSA-381042                                     | 2/28   | 0.096785 | 0.447543 | 0 | 0 | 4.030852 | 9.413117 |
| Endosomal Sorting Complex Required For Transport                                             | 2/28   | 0.096785 | 0.447543 | 0 | 0 | 4.030852 | 9.413117 |

|                                                                                      |        |          |          |   |   |              |          |  |
|--------------------------------------------------------------------------------------|--------|----------|----------|---|---|--------------|----------|--|
| (ESCRT) Homo sapiens R-HSA-917729                                                    |        |          |          |   |   |              |          |  |
| The role of GTSE1 in G2/M progression after G2 checkpoint Homo sapiens R-HSA-8852276 | 3/59   | 0.099441 | 0.456587 | 0 | 0 | 2.8104<br>17 | 6.486985 |  |
| Negative regulation of FGFR3 signaling Homo sapiens R-HSA-5654732                    | 2/29   | 0.102711 | 0.468306 | 0 | 0 | 3.8813<br>63 | 8.833332 |  |
| Vitamins Homo sapiens R-HSA-211916                                                   | 1/6    | 0.107642 | 0.484018 | 0 | 0 | 10.463<br>47 | 23.32249 |  |
| Heme degradation Homo sapiens R-HSA-189483                                           | 1/6    | 0.107642 | 0.484018 | 0 | 0 | 10.463<br>47 | 23.32249 |  |
| Negative regulation of FGFR4 signaling Homo sapiens R-HSA-5654733                    | 2/31   | 0.114849 | 0.512889 | 0 | 0 | 3.6133<br>14 | 7.819695 |  |
| Gastrin-CREB signalling pathway via PKC and MAPK Homo sapiens R-HSA-881907           | 12/432 | 0.116453 | 0.516513 | 0 | 0 | 1.5073<br>78 | 3.241267 |  |
| Regulation of beta-cell development Homo sapiens R-HSA-186712                        | 2/32   | 0.121049 | 0.529692 | 0 | 0 | 3.4926<br>92 | 7.375018 |  |
| Negative regulation of FGFR1 signaling Homo sapiens R-HSA-5654726                    | 2/32   | 0.121049 | 0.529692 | 0 | 0 | 3.4926<br>92 | 7.375018 |  |
| Inositol transporters Homo sapiens R-HSA-429593                                      | 1/7    | 0.124423 | 0.53371  | 0 | 0 | 8.7191<br>11 | 18.1712  |  |
| Vitamin D (calciferol) metabolism Homo sapiens R-HSA-196791                          | 1/7    | 0.124423 | 0.53371  | 0 | 0 | 8.7191<br>11 | 18.1712  |  |
| PTK6 promotes HIF1A stabilization Homo sapiens R-HSA-8857538                         | 1/7    | 0.124423 | 0.53371  | 0 | 0 | 8.7191<br>11 | 18.1712  |  |
| Semaphorin interactions Homo sapiens R-HSA-373755                                    | 3/67   | 0.131802 | 0.546787 | 0 | 0 | 2.4581<br>1  | 4.981257 |  |
| Signaling by Insulin receptor Homo sapiens R-HSA-74752                               | 9/311  | 0.133679 | 0.546787 | 0 | 0 | 1.5689<br>95 | 3.157307 |  |
| Negative regulation of FGFR2 signaling Homo sapiens R-HSA-5654727                    | 2/34   | 0.133685 | 0.546787 | 0 | 0 | 3.2740<br>64 | 6.58831  |  |
| Interferon alpha/beta signaling Homo sapiens R-HSA-909733                            | 3/68   | 0.13608  | 0.546787 | 0 | 0 | 2.4201<br>69 | 4.827061 |  |
| Lysosome Vesicle Biogenesis Homo sapiens R-HSA-432720                                | 2/35   | 0.140109 | 0.546787 | 0 | 0 | 3.1746<br>88 | 6.239313 |  |
| Fanconi Anemia Pathway Homo sapiens R-HSA-6783310                                    | 2/35   | 0.140109 | 0.546787 | 0 | 0 | 3.1746<br>88 | 6.239313 |  |
| VEGF ligand-receptor interactions Homo sapiens R-HSA-194313                          | 1/8    | 0.14089  | 0.546787 | 0 | 0 | 7.4731<br>43 | 14.64569 |  |

|                                                                                                           |       |          |          |   |   |              |          |
|-----------------------------------------------------------------------------------------------------------|-------|----------|----------|---|---|--------------|----------|
| VEGF binds to VEGFR leading to receptor dimerization<br>Homo sapiens R-HSA-195399                         | 1/8   | 0.14089  | 0.546787 | 0 | 0 | 7.4731<br>43 | 14.64569 |
| Erythrocytes take up oxygen and release carbon dioxide<br>Homo sapiens R-HSA-1247673                      | 1/8   | 0.14089  | 0.546787 | 0 | 0 | 7.4731<br>43 | 14.64569 |
| Sema4D mediated inhibition of cell attachment and migration<br>Homo sapiens R-HSA-416550                  | 1/8   | 0.14089  | 0.546787 | 0 | 0 | 7.4731<br>43 | 14.64569 |
| Terminal pathway of complement<br>Homo sapiens R-HSA-166665                                               | 1/8   | 0.14089  | 0.546787 | 0 | 0 | 7.4731<br>43 | 14.64569 |
| Release of Hh-Np from the secreting cell<br>Homo sapiens R-HSA-5362798                                    | 1/8   | 0.14089  | 0.546787 | 0 | 0 | 7.4731<br>43 | 14.64569 |
| Ligand-receptor interactions<br>Homo sapiens R-HSA-5632681                                                | 1/8   | 0.14089  | 0.546787 | 0 | 0 | 7.4731<br>43 | 14.64569 |
| WNT mediated activation of DVL<br>Homo sapiens R-HSA-201688                                               | 1/8   | 0.14089  | 0.546787 | 0 | 0 | 7.4731<br>43 | 14.64569 |
| BH3-only proteins associate with and inactivate anti-apoptotic BCL-2 members<br>Homo sapiens R-HSA-111453 | 1/8   | 0.14089  | 0.546787 | 0 | 0 | 7.4731<br>43 | 14.64569 |
| Downregulation of ERBB4 signaling<br>Homo sapiens R-HSA-1253288                                           | 1/8   | 0.14089  | 0.546787 | 0 | 0 | 7.4731<br>43 | 14.64569 |
| NCAM1 interactions<br>Homo sapiens R-HSA-419037                                                           | 2/37  | 0.15315  | 0.572245 | 0 | 0 | 2.9929<br>72 | 5.615825 |
| Signaling by NOTCH1<br>Homo sapiens R-HSA-1980143                                                         | 3/72  | 0.15365  | 0.572245 | 0 | 0 | 2.2794<br>03 | 4.269494 |
| Downstream signaling events of B Cell Receptor (BCR)<br>Homo sapiens R-HSA-1168372                        | 6/192 | 0.154428 | 0.572245 | 0 | 0 | 1.6946<br>82 | 3.16571  |
| CHL1 interactions<br>Homo sapiens R-HSA-447041                                                            | 1/9   | 0.157048 | 0.572245 | 0 | 0 | 6.5386<br>67 | 12.10442 |
| Ca <sup>2+</sup> activated K <sup>+</sup> channels<br>Homo sapiens R-HSA-1296052                          | 1/9   | 0.157048 | 0.572245 | 0 | 0 | 6.5386<br>67 | 12.10442 |
| Prostanoid ligand receptors<br>Homo sapiens R-HSA-391908                                                  | 1/9   | 0.157048 | 0.572245 | 0 | 0 | 6.5386<br>67 | 12.10442 |
| AKT phosphorylates targets in the nucleus<br>Homo sapiens R-HSA-198693                                    | 1/9   | 0.157048 | 0.572245 | 0 | 0 | 6.5386<br>67 | 12.10442 |
| Highly calcium permeable nicotinic acetylcholine receptors<br>Homo sapiens R-HSA-629597                   | 1/9   | 0.157048 | 0.572245 | 0 | 0 | 6.5386<br>67 | 12.10442 |

|                                                                                                      |       |          |          |   |   |              |          |
|------------------------------------------------------------------------------------------------------|-------|----------|----------|---|---|--------------|----------|
| PTK6 Regulates RTKs and Their Effectors AKT1 and DOK1 Homo sapiens R-HSA-8849469                     | 1/9   | 0.157048 | 0.572245 | 0 | 0 | 6.5386<br>67 | 12.10442 |
| EGFR Transactivation by Gastrin Homo sapiens R-HSA-2179392                                           | 1/9   | 0.157048 | 0.572245 | 0 | 0 | 6.5386<br>67 | 12.10442 |
| Activated TLR4 signalling Homo sapiens R-HSA-166054                                                  | 4/112 | 0.160306 | 0.572245 | 0 | 0 | 1.9430<br>51 | 3.557081 |
| Interferon Signaling Homo sapiens R-HSA-913531                                                       | 6/196 | 0.165023 | 0.572245 | 0 | 0 | 1.6586<br>63 | 2.988368 |
| Collagen degradation Homo sapiens R-HSA-1442490                                                      | 2/39  | 0.166414 | 0.572245 | 0 | 0 | 2.8309       | 5.076589 |
| Activation of NMDA receptor upon glutamate binding and postsynaptic events Homo sapiens R-HSA-442755 | 2/39  | 0.166414 | 0.572245 | 0 | 0 | 2.8309       | 5.076589 |
| Abacavir transport and metabolism Homo sapiens R-HSA-2161522                                         | 1/10  | 0.172902 | 0.572245 | 0 | 0 | 5.8118<br>52 | 10.19997 |
| eNOS activation Homo sapiens R-HSA-203615                                                            | 1/10  | 0.172902 | 0.572245 | 0 | 0 | 5.8118<br>52 | 10.19997 |
| Tetrahydrobiopterin (BH4) synthesis. recycling. salvage and regulation Homo sapiens R-HSA-1474151    | 1/10  | 0.172902 | 0.572245 | 0 | 0 | 5.8118<br>52 | 10.19997 |
| ATF6-alpha activates chaperone genes Homo sapiens R-HSA-381183                                       | 1/10  | 0.172902 | 0.572245 | 0 | 0 | 5.8118<br>52 | 10.19997 |
| Regulation of signaling by NODAL Homo sapiens R-HSA-1433617                                          | 1/10  | 0.172902 | 0.572245 | 0 | 0 | 5.8118<br>52 | 10.19997 |
| SLBP independent Processing of Histone Pre-mRNAs Homo sapiens R-HSA-111367                           | 1/10  | 0.172902 | 0.572245 | 0 | 0 | 5.8118<br>52 | 10.19997 |
| IRAK2 mediated activation of TAK1 complex upon TLR7/8 or 9 stimulation Homo sapiens R-HSA-975163     | 1/10  | 0.172902 | 0.572245 | 0 | 0 | 5.8118<br>52 | 10.19997 |
| IRAK2 mediated activation of TAK1 complex Homo sapiens R-HSA-937042                                  | 1/10  | 0.172902 | 0.572245 | 0 | 0 | 5.8118<br>52 | 10.19997 |
| Diseases of carbohydrate metabolism Homo sapiens R-HSA-5663084                                       | 1/10  | 0.172902 | 0.572245 | 0 | 0 | 5.8118<br>52 | 10.19997 |
| Myoclonic epilepsy of Lafora Homo sapiens R-HSA-3785653                                              | 1/10  | 0.172902 | 0.572245 | 0 | 0 | 5.8118<br>52 | 10.19997 |
| Glycogen storage diseases Homo sapiens R-HSA-3229121                                                 | 1/10  | 0.172902 | 0.572245 | 0 | 0 | 5.8118<br>52 | 10.19997 |

|                                                                                                   |       |          |          |   |   |              |          |
|---------------------------------------------------------------------------------------------------|-------|----------|----------|---|---|--------------|----------|
| Signaling by FGFR3 fusions in cancer Homo sapiens R-HSA-8853334                                   | 1/10  | 0.172902 | 0.572245 | 0 | 0 | 5.8118<br>52 | 10.19997 |
| Activation of the AP-1 family of transcription factors Homo sapiens R-HSA-450341                  | 1/10  | 0.172902 | 0.572245 | 0 | 0 | 5.8118<br>52 | 10.19997 |
| IRAK1 recruits IKK complex Homo sapiens R-HSA-937039                                              | 1/10  | 0.172902 | 0.572245 | 0 | 0 | 5.8118<br>52 | 10.19997 |
| IRAK1 recruits IKK complex upon TLR7/8 or 9 stimulation Homo sapiens R-HSA-975144                 | 1/10  | 0.172902 | 0.572245 | 0 | 0 | 5.8118<br>52 | 10.19997 |
| Glucose metabolism Homo sapiens R-HSA-70326                                                       | 3/79  | 0.185945 | 0.598327 | 0 | 0 | 2.0687<br>17 | 3.480208 |
| EPHB-mediated forward signaling Homo sapiens R-HSA-3928662                                        | 2/42  | 0.186654 | 0.598327 | 0 | 0 | 2.6181<br>82 | 4.394618 |
| SLBP Dependent Processing of Replication-Dependent Histone Pre-mRNAs Homo sapiens R-HSA-77588     | 1/11  | 0.188459 | 0.598327 | 0 | 0 | 5.2304       | 8.728872 |
| Highly calcium permeable postsynaptic nicotinic acetylcholine receptors Homo sapiens R-HSA-629594 | 1/11  | 0.188459 | 0.598327 | 0 | 0 | 5.2304       | 8.728872 |
| Response to metal ions Homo sapiens R-HSA-5660526                                                 | 1/11  | 0.188459 | 0.598327 | 0 | 0 | 5.2304       | 8.728872 |
| Metallothioneins bind metals Homo sapiens R-HSA-5661231                                           | 1/11  | 0.188459 | 0.598327 | 0 | 0 | 5.2304       | 8.728872 |
| Interleukin-6 signaling Homo sapiens R-HSA-1059683                                                | 1/11  | 0.188459 | 0.598327 | 0 | 0 | 5.2304       | 8.728872 |
| Signaling by FGFR4 in disease Homo sapiens R-HSA-5655291                                          | 1/11  | 0.188459 | 0.598327 | 0 | 0 | 5.2304       | 8.728872 |
| TP53 Regulates Transcription of Cell Death Genes Homo sapiens R-HSA-5633008                       | 2/43  | 0.193476 | 0.598327 | 0 | 0 | 2.5541<br>93 | 4.195522 |
| PI-3K cascade:FGFR1 Homo sapiens R-HSA-5654689                                                    | 4/122 | 0.197525 | 0.598327 | 0 | 0 | 1.7774<br>74 | 2.882869 |
| PI-3K cascade:FGFR3 Homo sapiens R-HSA-5654710                                                    | 4/122 | 0.197525 | 0.598327 | 0 | 0 | 1.7774<br>74 | 2.882869 |
| PI3K events in ERBB4 signaling Homo sapiens R-HSA-1250342                                         | 4/122 | 0.197525 | 0.598327 | 0 | 0 | 1.7774<br>74 | 2.882869 |
| PIP3 activates AKT signaling Homo sapiens R-HSA-1257604                                           | 4/122 | 0.197525 | 0.598327 | 0 | 0 | 1.7774<br>74 | 2.882869 |
| PI-3K cascade:FGFR4 Homo sapiens R-HSA-5654720                                                    | 4/122 | 0.197525 | 0.598327 | 0 | 0 | 1.7774<br>74 | 2.882869 |
| PI-3K cascade:FGFR2 Homo sapiens R-HSA-5654695                                                    | 4/122 | 0.197525 | 0.598327 | 0 | 0 | 1.7774<br>74 | 2.882869 |

|                                                                                                                 |       |          |          |   |   |              |          |
|-----------------------------------------------------------------------------------------------------------------|-------|----------|----------|---|---|--------------|----------|
| Toll Like Receptor 4 (TLR4)<br>Cascade Homo sapiens R-<br>HSA-166016                                            | 4/122 | 0.197525 | 0.598327 | 0 | 0 | 1.7774<br>74 | 2.882869 |
| Toll Like Receptor 10 (TLR10)<br>Cascade Homo sapiens R-<br>HSA-168142                                          | 3/82  | 0.200292 | 0.598327 | 0 | 0 | 1.9898<br>53 | 3.199638 |
| Toll Like Receptor 5 (TLR5)<br>Cascade Homo sapiens R-<br>HSA-168176                                            | 3/82  | 0.200292 | 0.598327 | 0 | 0 | 1.9898<br>53 | 3.199638 |
| MyD88 cascade initiated on<br>plasma membrane Homo<br>sapiens R-HSA-975871                                      | 3/82  | 0.200292 | 0.598327 | 0 | 0 | 1.9898<br>53 | 3.199638 |
| Interleukin-1 signaling Homo<br>sapiens R-HSA-446652                                                            | 2/44  | 0.20033  | 0.598327 | 0 | 0 | 2.4932<br>52 | 4.008625 |
| Erythrocytes take up carbon<br>dioxide and release oxygen<br>Homo sapiens R-HSA-<br>1237044                     | 1/12  | 0.203725 | 0.598327 | 0 | 0 | 4.7546<br>67 | 7.564606 |
| O2/CO2 exchange in<br>erythrocytes Homo sapiens R-<br>HSA-1480926                                               | 1/12  | 0.203725 | 0.598327 | 0 | 0 | 4.7546<br>67 | 7.564606 |
| ATF6-alpha activates<br>chaperones Homo sapiens R-<br>HSA-381033                                                | 1/12  | 0.203725 | 0.598327 | 0 | 0 | 4.7546<br>67 | 7.564606 |
| The NLRP3 inflammasome<br>Homo sapiens R-HSA-844456                                                             | 1/12  | 0.203725 | 0.598327 | 0 | 0 | 4.7546<br>67 | 7.564606 |
| Presynaptic nicotinic<br>acetylcholine receptors Homo<br>sapiens R-HSA-622323                                   | 1/12  | 0.203725 | 0.598327 | 0 | 0 | 4.7546<br>67 | 7.564606 |
| TRAF6 mediated induction of<br>NFkB and MAP kinases upon<br>TLR7/8 or 9 activation Homo<br>sapiens R-HSA-975138 | 3/83  | 0.205132 | 0.599759 | 0 | 0 | 1.9648<br>79 | 3.112565 |
| GAB1 signalosome Homo<br>sapiens R-HSA-180292                                                                   | 4/125 | 0.209171 | 0.601666 | 0 | 0 | 1.7331<br>38 | 2.711673 |
| PI3K/AKT activation Homo<br>sapiens R-HSA-198203                                                                | 4/125 | 0.209171 | 0.601666 | 0 | 0 | 1.7331<br>38 | 2.711673 |
| TP53 Regulates Metabolic<br>Genes Homo sapiens R-HSA-<br>5628897                                                | 3/84  | 0.209999 | 0.601666 | 0 | 0 | 1.9405<br>22 | 3.028482 |
| MyD88 dependent cascade<br>initiated on endosome Homo<br>sapiens R-HSA-975155                                   | 3/85  | 0.214891 | 0.601666 | 0 | 0 | 1.9167<br>59 | 2.947257 |
| Toll Like Receptor 7/8<br>(TLR7/8) Cascade Homo<br>sapiens R-HSA-168181                                         | 3/85  | 0.214891 | 0.601666 | 0 | 0 | 1.9167<br>59 | 2.947257 |
| Facilitative Na+-independent<br>glucose transporters Homo<br>sapiens R-HSA-428790                               | 1/13  | 0.218704 | 0.601666 | 0 | 0 | 4.3582<br>22 | 6.624662 |
| Synthesis, secretion, and<br>inactivation of Glucose-<br>dependent Insulinotropic                               | 1/13  | 0.218704 | 0.601666 | 0 | 0 | 4.3582<br>22 | 6.624662 |

|                                                                                                                                                                 |        |          |          |   |   |              |          |
|-----------------------------------------------------------------------------------------------------------------------------------------------------------------|--------|----------|----------|---|---|--------------|----------|
| Polypeptide (GIP) Homo sapiens R-HSA-400511                                                                                                                     |        |          |          |   |   |              |          |
| TP53 Regulates Transcription of Genes Involved in G1 Cell Cycle Arrest Homo sapiens R-HSA-6804116                                                               | 1/13   | 0.218704 | 0.601666 | 0 | 0 | 4.3582<br>22 | 6.624662 |
| Signaling by Activin Homo sapiens R-HSA-1502540                                                                                                                 | 1/13   | 0.218704 | 0.601666 | 0 | 0 | 4.3582<br>22 | 6.624662 |
| AKT phosphorylates targets in the cytosol Homo sapiens R-HSA-198323                                                                                             | 1/13   | 0.218704 | 0.601666 | 0 | 0 | 4.3582<br>22 | 6.624662 |
| p75NTR recruits signalling complexes Homo sapiens R-HSA-209543                                                                                                  | 1/13   | 0.218704 | 0.601666 | 0 | 0 | 4.3582<br>22 | 6.624662 |
| NF-kB is activated and signals survival Homo sapiens R-HSA-209560                                                                                               | 1/13   | 0.218704 | 0.601666 | 0 | 0 | 4.3582<br>22 | 6.624662 |
| ERBB2 Activates PTK6 Signaling Homo sapiens R-HSA-8847993                                                                                                       | 1/13   | 0.218704 | 0.601666 | 0 | 0 | 4.3582<br>22 | 6.624662 |
| Downregulation of ERBB2:ERBB3 signaling Homo sapiens R-HSA-1358803                                                                                              | 1/13   | 0.218704 | 0.601666 | 0 | 0 | 4.3582<br>22 | 6.624662 |
| Regulation of PLK1 Activity at G2/M Transition Homo sapiens R-HSA-2565942                                                                                       | 3/87   | 0.224746 | 0.607204 | 0 | 0 | 1.8709<br>31 | 2.7929   |
| Hexose transport Homo sapiens R-HSA-189200                                                                                                                      | 2/48   | 0.227991 | 0.607204 | 0 | 0 | 2.2759<br>82 | 3.364927 |
| Signalling by NGF Homo sapiens R-HSA-166520                                                                                                                     | 11/450 | 0.228658 | 0.607204 | 0 | 0 | 1.3170<br>34 | 1.943321 |
| Toll Like Receptor 9 (TLR9) Cascade Homo sapiens R-HSA-168138                                                                                                   | 3/88   | 0.229706 | 0.607204 | 0 | 0 | 1.8488<br>25 | 2.719541 |
| SEMA3A-Plexin repulsion signaling by inhibiting Integrin adhesion Homo sapiens R-HSA-399955                                                                     | 1/14   | 0.233402 | 0.607204 | 0 | 0 | 4.0227<br>69 | 5.853109 |
| Early Phase of HIV Life Cycle Homo sapiens R-HSA-162594                                                                                                         | 1/14   | 0.233402 | 0.607204 | 0 | 0 | 4.0227<br>69 | 5.853109 |
| Regulation of TP53 Activity through Association with Co-factors Homo sapiens R-HSA-6804759                                                                      | 1/14   | 0.233402 | 0.607204 | 0 | 0 | 4.0227<br>69 | 5.853109 |
| TP53 regulates transcription of several additional cell death genes whose specific roles in p53-dependent apoptosis remain uncertain Homo sapiens R-HSA-6803205 | 1/14   | 0.233402 | 0.607204 | 0 | 0 | 4.0227<br>69 | 5.853109 |

|                                                                                                                 |      |          |          |   |   |              |          |
|-----------------------------------------------------------------------------------------------------------------|------|----------|----------|---|---|--------------|----------|
| Glutathione synthesis and recycling Homo sapiens R-HSA-174403                                                   | 1/14 | 0.233402 | 0.607204 | 0 | 0 | 4.0227<br>69 | 5.853109 |
| Regulation of pyruvate dehydrogenase (PDH) complex Homo sapiens R-HSA-204174                                    | 1/14 | 0.233402 | 0.607204 | 0 | 0 | 4.0227<br>69 | 5.853109 |
| Activation of Nicotinic Acetylcholine Receptors Homo sapiens R-HSA-629602                                       | 1/14 | 0.233402 | 0.607204 | 0 | 0 | 4.0227<br>69 | 5.853109 |
| Postsynaptic nicotinic acetylcholine receptors Homo sapiens R-HSA-622327                                        | 1/14 | 0.233402 | 0.607204 | 0 | 0 | 4.0227<br>69 | 5.853109 |
| Acetylcholine Binding And Downstream Events Homo sapiens R-HSA-181431                                           | 1/14 | 0.233402 | 0.607204 | 0 | 0 | 4.0227<br>69 | 5.853109 |
| Activation of anterior HOX genes in hindbrain development during early embryogenesis Homo sapiens R-HSA-5617472 | 3/89 | 0.234686 | 0.607204 | 0 | 0 | 1.8272<br>34 | 2.648585 |
| Activation of HOX genes during differentiation Homo sapiens R-HSA-5619507                                       | 3/89 | 0.234686 | 0.607204 | 0 | 0 | 1.8272<br>34 | 2.648585 |
| CREB phosphorylation through the activation of CaMKII Homo sapiens R-HSA-442729                                 | 1/15 | 0.247824 | 0.616722 | 0 | 0 | 3.7352<br>38 | 5.210798 |
| Eicosanoid ligand-binding receptors Homo sapiens R-HSA-391903                                                   | 1/15 | 0.247824 | 0.616722 | 0 | 0 | 3.7352<br>38 | 5.210798 |
| Regulation of innate immune responses to cytosolic DNA Homo sapiens R-HSA-3134975                               | 1/15 | 0.247824 | 0.616722 | 0 | 0 | 3.7352<br>38 | 5.210798 |
| Association of licensing factors with the pre-replicative complex Homo sapiens R-HSA-69298                      | 1/15 | 0.247824 | 0.616722 | 0 | 0 | 3.7352<br>38 | 5.210798 |
| NRIF signals cell death from the nucleus Homo sapiens R-HSA-205043                                              | 1/15 | 0.247824 | 0.616722 | 0 | 0 | 3.7352<br>38 | 5.210798 |
| Glycogen synthesis Homo sapiens R-HSA-3322077                                                                   | 1/15 | 0.247824 | 0.616722 | 0 | 0 | 3.7352<br>38 | 5.210798 |
| Glycogen breakdown (glycogenolysis) Homo sapiens R-HSA-70221                                                    | 1/15 | 0.247824 | 0.616722 | 0 | 0 | 3.7352<br>38 | 5.210798 |
| ERBB2 Regulates Cell Motility Homo sapiens R-HSA-6785631                                                        | 1/15 | 0.247824 | 0.616722 | 0 | 0 | 3.7352<br>38 | 5.210798 |

|                                                                                                      |        |          |          |   |   |              |          |
|------------------------------------------------------------------------------------------------------|--------|----------|----------|---|---|--------------|----------|
| Signaling by EGFRvIII in Cancer Homo sapiens R-HSA-5637812                                           | 1/15   | 0.247824 | 0.616722 | 0 | 0 | 3.7352<br>38 | 5.210798 |
| Constitutive Signaling by EGFRvIII Homo sapiens R-HSA-5637810                                        | 1/15   | 0.247824 | 0.616722 | 0 | 0 | 3.7352<br>38 | 5.210798 |
| Metabolism of fat-soluble vitamins Homo sapiens R-HSA-6806667                                        | 2/51   | 0.248904 | 0.617054 | 0 | 0 | 2.1363<br>09 | 2.970942 |
| Mitotic G1-G1/S phases Homo sapiens R-HSA-453279                                                     | 4/136  | 0.253366 | 0.618869 | 0 | 0 | 1.5878<br>14 | 2.179942 |
| Interferon gamma signaling Homo sapiens R-HSA-877300                                                 | 3/93   | 0.254787 | 0.618869 | 0 | 0 | 1.7456<br>66 | 2.386898 |
| Innate Immune System Homo sapiens R-HSA-168249                                                       | 18/807 | 0.260976 | 0.618869 | 0 | 0 | 1.2002<br>68 | 1.612354 |
| Regulation of KIT signaling Homo sapiens R-HSA-1433559                                               | 1/16   | 0.261975 | 0.618869 | 0 | 0 | 3.4860<br>44 | 4.669576 |
| Sema3A PAK dependent Axon repulsion Homo sapiens R-HSA-399954                                        | 1/16   | 0.261975 | 0.618869 | 0 | 0 | 3.4860<br>44 | 4.669576 |
| TGF-beta receptor signaling in EMT (epithelial to mesenchymal transition) Homo sapiens R-HSA-2173791 | 1/16   | 0.261975 | 0.618869 | 0 | 0 | 3.4860<br>44 | 4.669576 |
| Translesion synthesis by REV1 Homo sapiens R-HSA-110312                                              | 1/16   | 0.261975 | 0.618869 | 0 | 0 | 3.4860<br>44 | 4.669576 |
| p75NTR signals via NF-kB Homo sapiens R-HSA-193639                                                   | 1/16   | 0.261975 | 0.618869 | 0 | 0 | 3.4860<br>44 | 4.669576 |
| TRAF6 mediated induction of TAK1 complex Homo sapiens R-HSA-937072                                   | 1/16   | 0.261975 | 0.618869 | 0 | 0 | 3.4860<br>44 | 4.669576 |
| Spry regulation of FGF signaling Homo sapiens R-HSA-1295596                                          | 1/16   | 0.261975 | 0.618869 | 0 | 0 | 3.4860<br>44 | 4.669576 |
| PI3K events in ERBB2 signaling Homo sapiens R-HSA-1963642                                            | 1/16   | 0.261975 | 0.618869 | 0 | 0 | 3.4860<br>44 | 4.669576 |
| GRB2 events in ERBB2 signaling Homo sapiens R-HSA-1963640                                            | 1/16   | 0.261975 | 0.618869 | 0 | 0 | 3.4860<br>44 | 4.669576 |
| MAP3K8 (TPL2)-dependent MAPK1/3 activation Homo sapiens R-HSA-5684264                                | 1/16   | 0.261975 | 0.618869 | 0 | 0 | 3.4860<br>44 | 4.669576 |
| EPH-Ephrin signaling Homo sapiens R-HSA-2682334                                                      | 3/95   | 0.264928 | 0.620212 | 0 | 0 | 1.7075<br>42 | 2.268126 |
| Golgi Associated Vesicle Biogenesis Homo sapiens R-HSA-432722                                        | 2/54   | 0.269872 | 0.620212 | 0 | 0 | 2.0127<br>52 | 2.636315 |
| Toll-Like Receptors Cascades Homo sapiens R-HSA-168898                                               | 4/140  | 0.269901 | 0.620212 | 0 | 0 | 1.5407<br>97 | 2.017981 |

|                                                                                                                              |       |          |          |   |   |              |          |
|------------------------------------------------------------------------------------------------------------------------------|-------|----------|----------|---|---|--------------|----------|
| Visual phototransduction<br>Homo sapiens R-HSA-<br>2187338                                                                   | 3/97  | 0.275116 | 0.620212 | 0 | 0 | 1.6710<br>4  | 2.15658  |
| Signaling by the B Cell<br>Receptor (BCR) Homo sapiens<br>R-HSA-983705                                                       | 6/233 | 0.275147 | 0.620212 | 0 | 0 | 1.3856<br>65 | 1.78813  |
| Ras activation uopn Ca2+<br>influx through NMDA receptor<br>Homo sapiens R-HSA-442982                                        | 1/17  | 0.275861 | 0.620212 | 0 | 0 | 3.268        | 4.208719 |
| TNF receptor superfamily<br>(TNFSF) members mediating<br>non-canonical NF-kB pathway<br>Homo sapiens R-HSA-<br>5676594       | 1/17  | 0.275861 | 0.620212 | 0 | 0 | 3.268        | 4.208719 |
| Trafficking of GluR2-<br>containing AMPA receptors<br>Homo sapiens R-HSA-416993                                              | 1/17  | 0.275861 | 0.620212 | 0 | 0 | 3.268        | 4.208719 |
| Tristetraprolin (TTP. ZFP36)<br>binds and destabilizes mRNA<br>Homo sapiens R-HSA-450513                                     | 1/17  | 0.275861 | 0.620212 | 0 | 0 | 3.268        | 4.208719 |
| Inflammasomes Homo<br>sapiens R-HSA-622312                                                                                   | 1/17  | 0.275861 | 0.620212 | 0 | 0 | 3.268        | 4.208719 |
| Formation of Senescence-<br>Associated Heterochromatin<br>Foci (SAHF) Homo sapiens R-<br>HSA-2559584                         | 1/17  | 0.275861 | 0.620212 | 0 | 0 | 3.268        | 4.208719 |
| Metabolism of porphyrins<br>Homo sapiens R-HSA-189445                                                                        | 1/17  | 0.275861 | 0.620212 | 0 | 0 | 3.268        | 4.208719 |
| Translesion synthesis by POLK<br>Homo sapiens R-HSA-<br>5655862                                                              | 1/17  | 0.275861 | 0.620212 | 0 | 0 | 3.268        | 4.208719 |
| Translesion synthesis by POLI<br>Homo sapiens R-HSA-<br>5656121                                                              | 1/17  | 0.275861 | 0.620212 | 0 | 0 | 3.268        | 4.208719 |
| Hh mutants that don't<br>undergo autocatalytic<br>processing are degraded by<br>ERAD Homo sapiens R-HSA-<br>5362768          | 2/55  | 0.276862 | 0.620323 | 0 | 0 | 1.9746<br>75 | 2.535948 |
| Neurotransmitter Receptor<br>Binding And Downstream<br>Transmission In The<br>Postsynaptic Cell Homo<br>sapiens R-HSA-112314 | 4/142 | 0.27824  | 0.621276 | 0 | 0 | 1.5183<br>11 | 1.942331 |
| Chemokine receptors bind<br>chemokines Homo sapiens R-<br>HSA-380108                                                         | 2/56  | 0.283848 | 0.631634 | 0 | 0 | 1.9380<br>08 | 2.440567 |
| Activation of SMO Homo<br>sapiens R-HSA-5635838                                                                              | 1/18  | 0.289487 | 0.635506 | 0 | 0 | 3.0756<br>08 | 3.812667 |
| TP53 Regulates Transcription<br>of Genes Involved in G2 Cell                                                                 | 1/18  | 0.289487 | 0.635506 | 0 | 0 | 3.0756<br>08 | 3.812667 |

|                                                                                                                                      |      |          |          |   |   |          |          |
|--------------------------------------------------------------------------------------------------------------------------------------|------|----------|----------|---|---|----------|----------|
| Cycle Arrest Homo sapiens R-HSA-6804114                                                                                              |      |          |          |   |   |          |          |
| SHC1 events in ERBB2 signaling Homo sapiens R-HSA-1250196                                                                            | 1/18 | 0.289487 | 0.635506 | 0 | 0 | 3.075608 | 3.812667 |
| Activation of IRF3/IRF7 mediated by TBK1/IKK epsilon Homo sapiens R-HSA-936964                                                       | 1/18 | 0.289487 | 0.635506 | 0 | 0 | 3.075608 | 3.812667 |
| Hh mutants abrogate ligand secretion Homo sapiens R-HSA-5387390                                                                      | 2/57 | 0.290827 | 0.636306 | 0 | 0 | 1.902674 | 2.349854 |
| Recruitment and ATM-mediated phosphorylation of repair and signaling proteins at DNA double strand breaks Homo sapiens R-HSA-5693565 | 2/58 | 0.297797 | 0.643048 | 0 | 0 | 1.868602 | 2.263516 |
| GABA synthesis. release. reuptake and degradation Homo sapiens R-HSA-888590                                                          | 1/19 | 0.302856 | 0.643048 | 0 | 0 | 2.904593 | 3.469528 |
| Other semaphorin interactions Homo sapiens R-HSA-416700                                                                              | 1/19 | 0.302856 | 0.643048 | 0 | 0 | 2.904593 | 3.469528 |
| Ephrin signaling Homo sapiens R-HSA-3928664                                                                                          | 1/19 | 0.302856 | 0.643048 | 0 | 0 | 2.904593 | 3.469528 |
| TP53 Regulates Transcription of Genes Involved in Cytochrome C Release Homo sapiens R-HSA-6803204                                    | 1/19 | 0.302856 | 0.643048 | 0 | 0 | 2.904593 | 3.469528 |
| Signaling by NODAL Homo sapiens R-HSA-1181150                                                                                        | 1/19 | 0.302856 | 0.643048 | 0 | 0 | 2.904593 | 3.469528 |
| Phase 4 - resting membrane potential Homo sapiens R-HSA-5576886                                                                      | 1/19 | 0.302856 | 0.643048 | 0 | 0 | 2.904593 | 3.469528 |
| Translesion Synthesis by POLH Homo sapiens R-HSA-110320                                                                              | 1/19 | 0.302856 | 0.643048 | 0 | 0 | 2.904593 | 3.469528 |
| DNA Damage/Telomere Stress Induced Senescence Homo sapiens R-HSA-2559586                                                             | 2/59 | 0.304757 | 0.643048 | 0 | 0 | 1.835726 | 2.181282 |
| DNA Double Strand Break Response Homo sapiens R-HSA-5693606                                                                          | 2/59 | 0.304757 | 0.643048 | 0 | 0 | 1.835726 | 2.181282 |
| SCF(Skp2)-mediated degradation of p27/p21 Homo sapiens R-HSA-187577                                                                  | 2/59 | 0.304757 | 0.643048 | 0 | 0 | 1.835726 | 2.181282 |
| MAP kinase activation in TLR cascade Homo sapiens R-HSA-450294                                                                       | 2/60 | 0.311704 | 0.655585 | 0 | 0 | 1.803983 | 2.102903 |

|                                                                              |       |          |          |   |   |              |          |
|------------------------------------------------------------------------------|-------|----------|----------|---|---|--------------|----------|
| eNOS activation and regulation Homo sapiens R-HSA-203765                     | 1/20  | 0.315975 | 0.658619 | 0 | 0 | 2.7515<br>79 | 3.170073 |
| Metabolism of nitric oxide Homo sapiens R-HSA-202131                         | 1/20  | 0.315975 | 0.658619 | 0 | 0 | 2.7515<br>79 | 3.170073 |
| DNA Replication Homo sapiens R-HSA-69306                                     | 3/105 | 0.316178 | 0.658619 | 0 | 0 | 1.5393<br>47 | 1.772484 |
| Constitutive Signaling by Aberrant PI3K in Cancer Homo sapiens R-HSA-2219530 | 2/61  | 0.318637 | 0.661628 | 0 | 0 | 1.7733<br>16 | 2.028148 |
| Biological oxidations Homo sapiens R-HSA-211859                              | 5/199 | 0.319989 | 0.662326 | 0 | 0 | 1.3497<br>93 | 1.538047 |
| Degradation of the extracellular matrix Homo sapiens R-HSA-1474228           | 3/106 | 0.321328 | 0.662992 | 0 | 0 | 1.5243<br>24 | 1.730556 |
| HATs acetylate histones Homo sapiens R-HSA-3214847                           | 3/107 | 0.326478 | 0.671075 | 0 | 0 | 1.5095<br>9  | 1.689822 |
| Regulation of FZD by ubiquitination Homo sapiens R-HSA-4641263               | 1/21  | 0.328847 | 0.671075 | 0 | 0 | 2.6138<br>67 | 2.907041 |
| Collagen biosynthesis and modifying enzymes Homo sapiens R-HSA-1650814       | 2/63  | 0.33245  | 0.671075 | 0 | 0 | 1.715        | 1.888672 |
| Circadian Clock Homo sapiens R-HSA-400253                                    | 2/63  | 0.33245  | 0.671075 | 0 | 0 | 1.715        | 1.888672 |
| p53-Dependent G1/S DNA damage checkpoint Homo sapiens R-HSA-69580            | 2/63  | 0.33245  | 0.671075 | 0 | 0 | 1.715        | 1.888672 |
| p53-Dependent G1 DNA Damage Response Homo sapiens R-HSA-69563                | 2/63  | 0.33245  | 0.671075 | 0 | 0 | 1.715        | 1.888672 |
| Asymmetric localization of PCP proteins Homo sapiens R-HSA-4608870           | 2/63  | 0.33245  | 0.671075 | 0 | 0 | 1.715        | 1.888672 |
| Hedgehog ligand biogenesis Homo sapiens R-HSA-5358346                        | 2/64  | 0.339327 | 0.678792 | 0 | 0 | 1.6872<br>52 | 1.823569 |
| Pink/Parkin Mediated Mitophagy Homo sapiens R-HSA-5205685                    | 1/22  | 0.341478 | 0.678792 | 0 | 0 | 2.4892<br>7  | 2.674648 |
| Mitophagy Homo sapiens R-HSA-5205647                                         | 1/22  | 0.341478 | 0.678792 | 0 | 0 | 2.4892<br>7  | 2.674648 |
| Signaling by FGFR3 point mutants in cancer Homo sapiens R-HSA-8853338        | 1/22  | 0.341478 | 0.678792 | 0 | 0 | 2.4892<br>7  | 2.674648 |
| Signaling by FGFR3 in disease Homo sapiens R-HSA-5655332                     | 1/22  | 0.341478 | 0.678792 | 0 | 0 | 2.4892<br>7  | 2.674648 |

|                                                                                     |       |          |          |   |   |              |          |
|-------------------------------------------------------------------------------------|-------|----------|----------|---|---|--------------|----------|
| G1/S DNA Damage Checkpoints Homo sapiens R-HSA-69615                                | 2/65  | 0.346182 | 0.680604 | 0 | 0 | 1.6603<br>85 | 1.761323 |
| G1/S Transition Homo sapiens R-HSA-69206                                            | 3/112 | 0.35221  | 0.680604 | 0 | 0 | 1.4399<br>73 | 1.502654 |
| Activation of NF-kappaB in B cells Homo sapiens R-HSA-1169091                       | 2/66  | 0.353013 | 0.680604 | 0 | 0 | 1.6343<br>58 | 1.701775 |
| The canonical retinoid cycle in rods (twilight vision) Homo sapiens R-HSA-2453902   | 1/23  | 0.353872 | 0.680604 | 0 | 0 | 2.376        | 2.468235 |
| Incretin synthesis. secretion. and inactivation Homo sapiens R-HSA-400508           | 1/23  | 0.353872 | 0.680604 | 0 | 0 | 2.376        | 2.468235 |
| Deadenylation of mRNA Homo sapiens R-HSA-429947                                     | 1/23  | 0.353872 | 0.680604 | 0 | 0 | 2.376        | 2.468235 |
| Branched-chain amino acid catabolism Homo sapiens R-HSA-70895                       | 1/23  | 0.353872 | 0.680604 | 0 | 0 | 2.376        | 2.468235 |
| Gap-filling DNA repair synthesis and ligation in GG-NER Homo sapiens R-HSA-5696397  | 1/23  | 0.353872 | 0.680604 | 0 | 0 | 2.376        | 2.468235 |
| Downregulation of SMAD2/3:SMAD4 transcriptional activity Homo sapiens R-HSA-2173795 | 1/23  | 0.353872 | 0.680604 | 0 | 0 | 2.376        | 2.468235 |
| SHC-mediated cascade:FGFR4 Homo sapiens R-HSA-5654719                               | 1/23  | 0.353872 | 0.680604 | 0 | 0 | 2.376        | 2.468235 |
| APC/C:Cdc20 mediated degradation of Cyclin B Homo sapiens R-HSA-174048              | 1/23  | 0.353872 | 0.680604 | 0 | 0 | 2.376        | 2.468235 |
| PPARA activates gene expression Homo sapiens R-HSA-1989781                          | 3/113 | 0.357345 | 0.684554 | 0 | 0 | 1.4268<br>1  | 1.468263 |
| Role of LAT2/NTAL/LAB on calcium mobilization Homo sapiens R-HSA-2730905            | 4/162 | 0.363096 | 0.684554 | 0 | 0 | 1.3247<br>58 | 1.342095 |
| Transmission across Chemical Synapses Homo sapiens R-HSA-112315                     | 5/211 | 0.364552 | 0.684554 | 0 | 0 | 1.2703<br>79 | 1.281922 |
| Sema4D induced cell migration and growth-cone collapse Homo sapiens R-HSA-416572    | 1/24  | 0.366033 | 0.684554 | 0 | 0 | 2.2725<br>8  | 2.284013 |
| TNFs bind their physiological receptors Homo sapiens R-HSA-5669034                  | 1/24  | 0.366033 | 0.684554 | 0 | 0 | 2.2725<br>8  | 2.284013 |
| Post-Elongation Processing of Intronless pre-mRNA Homo sapiens R-HSA-112297         | 1/24  | 0.366033 | 0.684554 | 0 | 0 | 2.2725<br>8  | 2.284013 |

|                                                                                                                          |       |          |          |   |   |              |          |
|--------------------------------------------------------------------------------------------------------------------------|-------|----------|----------|---|---|--------------|----------|
| Processing of Capped Intronless Pre-mRNA Homo sapiens R-HSA-75067                                                        | 1/24  | 0.366033 | 0.684554 | 0 | 0 | 2.2725<br>8  | 2.284013 |
| IKK complex recruitment mediated by RIP1 Homo sapiens R-HSA-937041                                                       | 1/24  | 0.366033 | 0.684554 | 0 | 0 | 2.2725<br>8  | 2.284013 |
| Amyloid fiber formation Homo sapiens R-HSA-977225                                                                        | 2/68  | 0.3666   | 0.684554 | 0 | 0 | 1.5846<br>7  | 1.590192 |
| Cyclin E associated events during G1/S transition Homo sapiens R-HSA-69202                                               | 2/68  | 0.3666   | 0.684554 | 0 | 0 | 1.5846<br>7  | 1.590192 |
| Regulation of lipid metabolism by Peroxisome proliferator-activated receptor alpha (PPARalpha) Homo sapiens R-HSA-400206 | 3/116 | 0.372715 | 0.684554 | 0 | 0 | 1.3887<br>16 | 1.37058  |
| Cyclin A:Cdk2-associated events at S phase entry Homo sapiens R-HSA-69656                                                | 2/69  | 0.373352 | 0.684554 | 0 | 0 | 1.5609<br>39 | 1.53789  |
| Loss of Nlp from mitotic centrosomes Homo sapiens R-HSA-380259                                                           | 2/69  | 0.373352 | 0.684554 | 0 | 0 | 1.5609<br>39 | 1.53789  |
| Loss of proteins required for interphase microtubule organization?from the centrosome Homo sapiens R-HSA-380284          | 2/69  | 0.373352 | 0.684554 | 0 | 0 | 1.5609<br>39 | 1.53789  |
| Activation of G protein gated Potassium channels Homo sapiens R-HSA-1296041                                              | 1/25  | 0.377966 | 0.684554 | 0 | 0 | 2.1777<br>78 | 2.11887  |
| Inhibition of voltage gated Ca2+ channels via Gbeta/gamma subunits Homo sapiens R-HSA-997272                             | 1/25  | 0.377966 | 0.684554 | 0 | 0 | 2.1777<br>78 | 2.11887  |
| G protein gated Potassium channels Homo sapiens R-HSA-1296059                                                            | 1/25  | 0.377966 | 0.684554 | 0 | 0 | 2.1777<br>78 | 2.11887  |
| HDMs demethylate histones Homo sapiens R-HSA-3214842                                                                     | 1/25  | 0.377966 | 0.684554 | 0 | 0 | 2.1777<br>78 | 2.11887  |
| APC-Cdc20 mediated degradation of Nek2A Homo sapiens R-HSA-179409                                                        | 1/25  | 0.377966 | 0.684554 | 0 | 0 | 2.1777<br>78 | 2.11887  |
| trans-Golgi Network Vesicle Budding Homo sapiens R-HSA-199992                                                            | 2/70  | 0.380075 | 0.684554 | 0 | 0 | 1.5379<br>05 | 1.487751 |
| Clathrin derived vesicle budding Homo sapiens R-HSA-421837                                                               | 2/70  | 0.380075 | 0.684554 | 0 | 0 | 1.5379<br>05 | 1.487751 |
| Switching of origins to a post-replicative state Homo sapiens R-HSA-69052                                                | 2/70  | 0.380075 | 0.684554 | 0 | 0 | 1.5379<br>05 | 1.487751 |

|                                                                                                     |       |          |          |   |   |              |          |
|-----------------------------------------------------------------------------------------------------|-------|----------|----------|---|---|--------------|----------|
| Orc1 removal from chromatin<br>Homo sapiens R-HSA-68949                                             | 2/70  | 0.380075 | 0.684554 | 0 | 0 | 1.5379<br>05 | 1.487751 |
| SHC-mediated cascade:FGFR2<br>Homo sapiens R-HSA-5654699                                            | 1/26  | 0.389675 | 0.697051 | 0 | 0 | 2.0905<br>6  | 1.970232 |
| ISG15 antiviral mechanism<br>Homo sapiens R-HSA-1169408                                             | 2/72  | 0.393427 | 0.697051 | 0 | 0 | 1.4938<br>12 | 1.393516 |
| Antiviral mechanism by IFN-<br>stimulated genes Homo<br>sapiens R-HSA-1169410                       | 2/72  | 0.393427 | 0.697051 | 0 | 0 | 1.4938<br>12 | 1.393516 |
| Removal of licensing factors<br>from origins Homo sapiens R-<br>HSA-69300                           | 2/72  | 0.393427 | 0.697051 | 0 | 0 | 1.4938<br>12 | 1.393516 |
| TRAF6 Mediated Induction of<br>proinflammatory cytokines<br>Homo sapiens R-HSA-168180               | 2/72  | 0.393427 | 0.697051 | 0 | 0 | 1.4938<br>12 | 1.393516 |
| AURKA Activation by TPX2<br>Homo sapiens R-HSA-8854518                                              | 2/72  | 0.393427 | 0.697051 | 0 | 0 | 1.4938<br>12 | 1.393516 |
| Sema4D in semaphorin<br>signaling Homo sapiens R-<br>HSA-400685                                     | 1/27  | 0.401164 | 0.699356 | 0 | 0 | 2.0100<br>51 | 1.83595  |
| CREB phosphorylation<br>through the activation of Ras<br>Homo sapiens R-HSA-442742                  | 1/27  | 0.401164 | 0.699356 | 0 | 0 | 2.0100<br>51 | 1.83595  |
| EGFR downregulation Homo<br>sapiens R-HSA-182971                                                    | 1/27  | 0.401164 | 0.699356 | 0 | 0 | 2.0100<br>51 | 1.83595  |
| VEGFR2 mediated vascular<br>permeability Homo sapiens R-<br>HSA-5218920                             | 1/27  | 0.401164 | 0.699356 | 0 | 0 | 2.0100<br>51 | 1.83595  |
| Pyruvate metabolism Homo<br>sapiens R-HSA-70268                                                     | 1/27  | 0.401164 | 0.699356 | 0 | 0 | 2.0100<br>51 | 1.83595  |
| Interleukin-6 family signaling<br>Homo sapiens R-HSA-6783589                                        | 1/27  | 0.401164 | 0.699356 | 0 | 0 | 2.0100<br>51 | 1.83595  |
| Signaling by NOTCH Homo<br>sapiens R-HSA-157118                                                     | 3/122 | 0.403223 | 0.701071 | 0 | 0 | 1.3182<br>91 | 1.197358 |
| Binding and Uptake of<br>Ligands by Scavenger<br>Receptors Homo sapiens R-<br>HSA-2173782           | 2/74  | 0.406648 | 0.705145 | 0 | 0 | 1.4521<br>69 | 1.306671 |
| G2/M Transition Homo<br>sapiens R-HSA-69275                                                         | 4/173 | 0.409878 | 0.70886  | 0 | 0 | 1.2378<br>32 | 1.104018 |
| Recognition of DNA damage<br>by PCNA-containing<br>replication complex Homo<br>sapiens R-HSA-110314 | 1/28  | 0.412437 | 0.710846 | 0 | 0 | 1.9355<br>06 | 1.714221 |
| Regulation of DNA replication<br>Homo sapiens R-HSA-69304                                           | 2/75  | 0.413207 | 0.710846 | 0 | 0 | 1.4322<br>03 | 1.265792 |
| Mitotic G2-G2/M phases<br>Homo sapiens R-HSA-453274                                                 | 4/175 | 0.418321 | 0.717751 | 0 | 0 | 1.2232<br>28 | 1.066051 |

|                                                                                                   |       |          |          |   |   |              |          |
|---------------------------------------------------------------------------------------------------|-------|----------|----------|---|---|--------------|----------|
| Surfactant metabolism Homo sapiens R-HSA-5683826                                                  | 1/29  | 0.423499 | 0.719066 | 0 | 0 | 1.8662<br>86 | 1.60352  |
| Activation of BH3-only proteins Homo sapiens R-HSA-114452                                         | 1/29  | 0.423499 | 0.719066 | 0 | 0 | 1.8662<br>86 | 1.60352  |
| YAP1- and WWTR1 (TAZ)-stimulated gene expression Homo sapiens R-HSA-2032785                       | 1/29  | 0.423499 | 0.719066 | 0 | 0 | 1.8662<br>86 | 1.60352  |
| PIWI-interacting RNA (piRNA) biogenesis Homo sapiens R-HSA-5601884                                | 1/29  | 0.423499 | 0.719066 | 0 | 0 | 1.8662<br>86 | 1.60352  |
| Tight junction interactions Homo sapiens R-HSA-420029                                             | 1/30  | 0.434353 | 0.725355 | 0 | 0 | 1.8018<br>39 | 1.50255  |
| RNA Polymerase I Promoter Opening Homo sapiens R-HSA-73728                                        | 1/30  | 0.434353 | 0.725355 | 0 | 0 | 1.8018<br>39 | 1.50255  |
| Termination of translesion DNA synthesis Homo sapiens R-HSA-5656169                               | 1/30  | 0.434353 | 0.725355 | 0 | 0 | 1.8018<br>39 | 1.50255  |
| Activation of the pre-replicative complex Homo sapiens R-HSA-68962                                | 1/30  | 0.434353 | 0.725355 | 0 | 0 | 1.8018<br>39 | 1.50255  |
| MAPK targets/ Nuclear events mediated by MAP kinases Homo sapiens R-HSA-450282                    | 1/30  | 0.434353 | 0.725355 | 0 | 0 | 1.8018<br>39 | 1.50255  |
| Metabolism of carbohydrates Homo sapiens R-HSA-71387                                              | 6/282 | 0.43765  | 0.725355 | 0 | 0 | 1.1367<br>8  | 0.939362 |
| RNA Polymerase I Transcription Homo sapiens R-HSA-73864                                           | 2/79  | 0.439069 | 0.725355 | 0 | 0 | 1.3575<br>25 | 1.117377 |
| Centrosome maturation Homo sapiens R-HSA-380287                                                   | 2/79  | 0.439069 | 0.725355 | 0 | 0 | 1.3575<br>25 | 1.117377 |
| Recruitment of mitotic centrosome proteins and complexes Homo sapiens R-HSA-380270                | 2/79  | 0.439069 | 0.725355 | 0 | 0 | 1.3575<br>25 | 1.117377 |
| HS-GAG biosynthesis Homo sapiens R-HSA-2022928                                                    | 1/31  | 0.445003 | 0.725355 | 0 | 0 | 1.7416<br>89 | 1.4102   |
| Inwardly rectifying K+ channels Homo sapiens R-HSA-1296065                                        | 1/31  | 0.445003 | 0.725355 | 0 | 0 | 1.7416<br>89 | 1.4102   |
| Trafficking of AMPA receptors Homo sapiens R-HSA-399719                                           | 1/31  | 0.445003 | 0.725355 | 0 | 0 | 1.7416<br>89 | 1.4102   |
| Glutamate Binding. Activation of AMPA Receptors and Synaptic Plasticity Homo sapiens R-HSA-399721 | 1/31  | 0.445003 | 0.725355 | 0 | 0 | 1.7416<br>89 | 1.4102   |
| Export of Viral Ribonucleoproteins from Nucleus Homo sapiens R-HSA-168274                         | 1/31  | 0.445003 | 0.725355 | 0 | 0 | 1.7416<br>89 | 1.4102   |

|                                                                                                                                        |      |          |          |   |   |              |          |
|----------------------------------------------------------------------------------------------------------------------------------------|------|----------|----------|---|---|--------------|----------|
| Packaging Of Telomere Ends<br>Homo sapiens R-HSA-171306                                                                                | 1/31 | 0.445003 | 0.725355 | 0 | 0 | 1.7416<br>89 | 1.4102   |
| Regulation of TNFR1 signaling<br>Homo sapiens R-HSA-<br>5357905                                                                        | 1/31 | 0.445003 | 0.725355 | 0 | 0 | 1.7416<br>89 | 1.4102   |
| Processing of DNA double-<br>strand break ends Homo<br>sapiens R-HSA-5693607                                                           | 2/81 | 0.451766 | 0.733223 | 0 | 0 | 1.3230<br>22 | 1.051262 |
| Activation of Matrix<br>Metalloproteinases Homo<br>sapiens R-HSA-1592389                                                               | 1/32 | 0.455453 | 0.733223 | 0 | 0 | 1.6854<br>19 | 1.325519 |
| DNA methylation Homo<br>sapiens R-HSA-5334118                                                                                          | 1/32 | 0.455453 | 0.733223 | 0 | 0 | 1.6854<br>19 | 1.325519 |
| RNA Polymerase I<br>Transcription Termination<br>Homo sapiens R-HSA-73863                                                              | 1/32 | 0.455453 | 0.733223 | 0 | 0 | 1.6854<br>19 | 1.325519 |
| Gluconeogenesis Homo<br>sapiens R-HSA-70263                                                                                            | 1/32 | 0.455453 | 0.733223 | 0 | 0 | 1.6854<br>19 | 1.325519 |
| DNA Replication Pre-Initiation<br>Homo sapiens R-HSA-69002                                                                             | 2/82 | 0.458052 | 0.733784 | 0 | 0 | 1.3064<br>17 | 1.020013 |
| M/G1 Transition Homo<br>sapiens R-HSA-68874                                                                                            | 2/82 | 0.458052 | 0.733784 | 0 | 0 | 1.3064<br>17 | 1.020013 |
| PI5P, PP2A and IER3 Regulate<br>PI3K/AKT Signaling Homo<br>sapiens R-HSA-6811558                                                       | 2/83 | 0.464297 | 0.741965 | 0 | 0 | 1.2902<br>22 | 0.989897 |
| Inactivation, recovery and<br>regulation of the<br>phototransduction cascade<br>Homo sapiens R-HSA-<br>2514859                         | 1/33 | 0.465707 | 0.742399 | 0 | 0 | 1.6326<br>67 | 1.247681 |
| Class B/2 (Secretin family<br>receptors) Homo sapiens R-<br>HSA-373080                                                                 | 2/84 | 0.4705   | 0.747071 | 0 | 0 | 1.2744<br>23 | 0.960864 |
| EPHA-mediated growth cone<br>collapse Homo sapiens R-<br>HSA-3928663                                                                   | 1/34 | 0.475768 | 0.747071 | 0 | 0 | 1.5831<br>11 | 1.175973 |
| The phototransduction<br>cascade Homo sapiens R-HSA-<br>2514856                                                                        | 1/34 | 0.475768 | 0.747071 | 0 | 0 | 1.5831<br>11 | 1.175973 |
| Activated PKN1 stimulates<br>transcription of AR (androgen<br>receptor) regulated genes<br>KLK2 and KLK3 Homo sapiens<br>R-HSA-5625886 | 1/34 | 0.475768 | 0.747071 | 0 | 0 | 1.5831<br>11 | 1.175973 |
| Negative regulators of RIG-<br>I/MDA5 signaling Homo<br>sapiens R-HSA-936440                                                           | 1/34 | 0.475768 | 0.747071 | 0 | 0 | 1.5831<br>11 | 1.175973 |
| Collagen formation Homo<br>sapiens R-HSA-1474290                                                                                       | 2/85 | 0.476659 | 0.747071 | 0 | 0 | 1.2590<br>04 | 0.932864 |
| Hedgehog 'on' state Homo<br>sapiens R-HSA-5632684                                                                                      | 2/85 | 0.476659 | 0.747071 | 0 | 0 | 1.2590<br>04 | 0.932864 |

|                                                                                                              |       |          |          |   |   |              |          |
|--------------------------------------------------------------------------------------------------------------|-------|----------|----------|---|---|--------------|----------|
| Infectious disease Homo sapiens R-HSA-5663205                                                                | 7/348 | 0.481676 | 0.752109 | 0 | 0 | 1.0727<br>34 | 0.783615 |
| Unfolded Protein Response (UPR) Homo sapiens R-HSA-381119                                                    | 2/86  | 0.482775 | 0.752109 | 0 | 0 | 1.2439<br>52 | 0.905853 |
| Post NMDA receptor activation events Homo sapiens R-HSA-438064                                               | 1/35  | 0.485641 | 0.752109 | 0 | 0 | 1.5364<br>71 | 1.109772 |
| SIRT1 negatively regulates rRNA Expression Homo sapiens R-HSA-427359                                         | 1/35  | 0.485641 | 0.752109 | 0 | 0 | 1.5364<br>71 | 1.109772 |
| Regulation of TP53 Degradation Homo sapiens R-HSA-6804757                                                    | 1/35  | 0.485641 | 0.752109 | 0 | 0 | 1.5364<br>71 | 1.109772 |
| Regulation of TP53 Expression and Degradation Homo sapiens R-HSA-6806003                                     | 1/36  | 0.495328 | 0.763237 | 0 | 0 | 1.4924<br>95 | 1.048532 |
| Factors involved in megakaryocyte development and platelet production Homo sapiens R-HSA-983231              | 3/141 | 0.496338 | 0.763237 | 0 | 0 | 1.1356<br>8  | 0.795541 |
| HIV Life Cycle Homo sapiens R-HSA-162587                                                                     | 3/141 | 0.496338 | 0.763237 | 0 | 0 | 1.1356<br>8  | 0.795541 |
| Neuronal System Homo sapiens R-HSA-112316                                                                    | 6/301 | 0.499965 | 0.767004 | 0 | 0 | 1.0625<br>19 | 0.736558 |
| Steroid hormones Homo sapiens R-HSA-209943                                                                   | 1/37  | 0.504833 | 0.770845 | 0 | 0 | 1.4509<br>63 | 0.991775 |
| Translesion synthesis by Y family DNA polymerases bypasses lesions on DNA template Homo sapiens R-HSA-110313 | 1/37  | 0.504833 | 0.770845 | 0 | 0 | 1.4509<br>63 | 0.991775 |
| Negative regulation of the PI3K/AKT network Homo sapiens R-HSA-199418                                        | 2/90  | 0.506789 | 0.772025 | 0 | 0 | 1.1871<br>66 | 0.806869 |
| PCP/CE pathway Homo sapiens R-HSA-4086400                                                                    | 2/91  | 0.512679 | 0.775999 | 0 | 0 | 1.1737<br>67 | 0.7842   |
| Glutathione conjugation Homo sapiens R-HSA-156590                                                            | 1/38  | 0.514159 | 0.775999 | 0 | 0 | 1.4116<br>76 | 0.939079 |
| DNA Damage Recognition in GG-NER Homo sapiens R-HSA-5696394                                                  | 1/38  | 0.514159 | 0.775999 | 0 | 0 | 1.4116<br>76 | 0.939079 |
| Signaling by FGFR1 in disease Homo sapiens R-HSA-5655302                                                     | 1/38  | 0.514159 | 0.775999 | 0 | 0 | 1.4116<br>76 | 0.939079 |
| Phase 1 - Functionalization of compounds Homo sapiens R-HSA-211945                                           | 2/92  | 0.518522 | 0.776825 | 0 | 0 | 1.1606<br>65 | 0.762294 |
| GABA B receptor activation Homo sapiens R-HSA-977444                                                         | 1/39  | 0.52331  | 0.776825 | 0 | 0 | 1.3744<br>56 | 0.890072 |

|                                                                               |       |          |          |   |   |              |          |
|-------------------------------------------------------------------------------|-------|----------|----------|---|---|--------------|----------|
| Activation of GABAB receptors Homo sapiens R-HSA-991365                       | 1/39  | 0.52331  | 0.776825 | 0 | 0 | 1.3744<br>56 | 0.890072 |
| NS1 Mediated Effects on Host Pathways Homo sapiens R-HSA-168276               | 1/39  | 0.52331  | 0.776825 | 0 | 0 | 1.3744<br>56 | 0.890072 |
| tRNA modification in the nucleus and cytosol Homo sapiens R-HSA-6782315       | 1/39  | 0.52331  | 0.776825 | 0 | 0 | 1.3744<br>56 | 0.890072 |
| Dual Incision in GG-NER Homo sapiens R-HSA-5696400                            | 1/39  | 0.52331  | 0.776825 | 0 | 0 | 1.3744<br>56 | 0.890072 |
| Nuclear signaling by ERBB4 Homo sapiens R-HSA-1251985                         | 1/39  | 0.52331  | 0.776825 | 0 | 0 | 1.3744<br>56 | 0.890072 |
| Influenza Infection Homo sapiens R-HSA-168254                                 | 3/147 | 0.524238 | 0.776825 | 0 | 0 | 1.0880<br>25 | 0.702658 |
| PRC2 methylates histones and DNA Homo sapiens R-HSA-212300                    | 1/40  | 0.532289 | 0.784319 | 0 | 0 | 1.3391<br>45 | 0.844422 |
| TNFR2 non-canonical NF-kB pathway Homo sapiens R-HSA-5668541                  | 2/95  | 0.53577  | 0.784319 | 0 | 0 | 1.1230<br>52 | 0.700842 |
| Host Interactions with Influenza Factors Homo sapiens R-HSA-168253            | 1/41  | 0.5411   | 0.784319 | 0 | 0 | 1.3056       | 0.801836 |
| Condensation of Prophase Chromosomes Homo sapiens R-HSA-2299718               | 1/41  | 0.5411   | 0.784319 | 0 | 0 | 1.3056       | 0.801836 |
| TNF signaling Homo sapiens R-HSA-75893                                        | 1/41  | 0.5411   | 0.784319 | 0 | 0 | 1.3056       | 0.801836 |
| Regulation of TP53 Activity Homo sapiens R-HSA-5633007                        | 3/151 | 0.542359 | 0.784319 | 0 | 0 | 1.0584<br>02 | 0.647558 |
| Synthesis of DNA Homo sapiens R-HSA-69239                                     | 2/97  | 0.54703  | 0.784319 | 0 | 0 | 1.0992<br>96 | 0.663152 |
| MyD88-independent TLR3/TLR4 cascade Homo sapiens R-HSA-166166                 | 2/97  | 0.54703  | 0.784319 | 0 | 0 | 1.0992<br>96 | 0.663152 |
| Toll Like Receptor 3 (TLR3) Cascade Homo sapiens R-HSA-168164                 | 2/97  | 0.54703  | 0.784319 | 0 | 0 | 1.0992<br>96 | 0.663152 |
| TRIF-mediated TLR3/TLR4 signaling Homo sapiens R-HSA-937061                   | 2/97  | 0.54703  | 0.784319 | 0 | 0 | 1.0992<br>96 | 0.663152 |
| Anchoring of the basal body to the plasma membrane Homo sapiens R-HSA-5620912 | 2/97  | 0.54703  | 0.784319 | 0 | 0 | 1.0992<br>96 | 0.663152 |
| Signaling by Retinoic Acid Homo sapiens R-HSA-5362517                         | 1/42  | 0.549745 | 0.784319 | 0 | 0 | 1.2736<br>91 | 0.762051 |

|                                                                                                                               |       |          |          |   |   |              |          |
|-------------------------------------------------------------------------------------------------------------------------------|-------|----------|----------|---|---|--------------|----------|
| Retinoid metabolism and transport Homo sapiens R-HSA-975634                                                                   | 1/42  | 0.549745 | 0.784319 | 0 | 0 | 1.2736<br>91 | 0.762051 |
| Intrinsic Pathway for Apoptosis Homo sapiens R-HSA-109606                                                                     | 1/42  | 0.549745 | 0.784319 | 0 | 0 | 1.2736<br>91 | 0.762051 |
| Glucose transport Homo sapiens R-HSA-70153                                                                                    | 1/42  | 0.549745 | 0.784319 | 0 | 0 | 1.2736<br>91 | 0.762051 |
| Activation of gene expression by SREBF (SREBP) Homo sapiens R-HSA-2426168                                                     | 1/42  | 0.549745 | 0.784319 | 0 | 0 | 1.2736<br>91 | 0.762051 |
| Deactivation of the beta-catenin transactivating complex Homo sapiens R-HSA-3769402                                           | 1/42  | 0.549745 | 0.784319 | 0 | 0 | 1.2736<br>91 | 0.762051 |
| Potassium Channels Homo sapiens R-HSA-1296071                                                                                 | 2/99  | 0.558099 | 0.784406 | 0 | 0 | 1.0765<br>2  | 0.627847 |
| CLEC7A (Dectin-1) signaling Homo sapiens R-HSA-5607764                                                                        | 2/99  | 0.558099 | 0.784406 | 0 | 0 | 1.0765<br>2  | 0.627847 |
| Downstream TCR signaling Homo sapiens R-HSA-202424                                                                            | 2/99  | 0.558099 | 0.784406 | 0 | 0 | 1.0765<br>2  | 0.627847 |
| Iron uptake and transport Homo sapiens R-HSA-917937                                                                           | 1/43  | 0.558227 | 0.784406 | 0 | 0 | 1.2433<br>02 | 0.724831 |
| ERCC6 (CSB) and EHMT2 (G9a) positively regulate rRNA expression Homo sapiens R-HSA-427389                                     | 1/43  | 0.558227 | 0.784406 | 0 | 0 | 1.2433<br>02 | 0.724831 |
| Formation of Incision Complex in GG-NER Homo sapiens R-HSA-5696395                                                            | 1/43  | 0.558227 | 0.784406 | 0 | 0 | 1.2433<br>02 | 0.724831 |
| Signaling by FGFR2 in disease Homo sapiens R-HSA-5655253                                                                      | 1/43  | 0.558227 | 0.784406 | 0 | 0 | 1.2433<br>02 | 0.724831 |
| Intra-Golgi traffic Homo sapiens R-HSA-6811438                                                                                | 1/44  | 0.566551 | 0.794371 | 0 | 0 | 1.2143<br>26 | 0.689966 |
| Transport of glucose and other sugars. bile salts and organic acids. metal ions and amine compounds Homo sapiens R-HSA-425366 | 2/101 | 0.568974 | 0.794371 | 0 | 0 | 1.0546<br>64 | 0.594747 |
| Gene Silencing by RNA Homo sapiens R-HSA-211000                                                                               | 2/101 | 0.568974 | 0.794371 | 0 | 0 | 1.0546<br>64 | 0.594747 |
| Diseases of metabolism Homo sapiens R-HSA-5668914                                                                             | 1/45  | 0.574717 | 0.800675 | 0 | 0 | 1.1866<br>67 | 0.657267 |
| tRNA processing Homo sapiens R-HSA-72306                                                                                      | 2/103 | 0.579655 | 0.805831 | 0 | 0 | 1.0336<br>74 | 0.563686 |
| DNA Damage Bypass Homo sapiens R-HSA-73893                                                                                    | 1/46  | 0.582731 | 0.808384 | 0 | 0 | 1.1602<br>37 | 0.626563 |
| NOTCH1 Intracellular Domain Regulates Transcription                                                                           | 1/47  | 0.590594 | 0.81582  | 0 | 0 | 1.1349<br>57 | 0.597699 |

|                                                                                                                       |        |          |          |   |   |              |          |
|-----------------------------------------------------------------------------------------------------------------------|--------|----------|----------|---|---|--------------|----------|
| Homo sapiens R-HSA-2122947                                                                                            |        |          |          |   |   |              |          |
| Nucleotide-binding domain. leucine rich repeat containing receptor (NLR) signaling pathways Homo sapiens R-HSA-168643 | 1/47   | 0.590594 | 0.81582  | 0 | 0 | 1.1349<br>57 | 0.597699 |
| EPH-ephrin mediated repulsion of cells Homo sapiens R-HSA-3928665                                                     | 1/48   | 0.598308 | 0.821257 | 0 | 0 | 1.1107<br>52 | 0.570536 |
| Pyruvate metabolism and Citric Acid (TCA) cycle Homo sapiens R-HSA-71406                                              | 1/48   | 0.598308 | 0.821257 | 0 | 0 | 1.1107<br>52 | 0.570536 |
| Death Receptor Signalling Homo sapiens R-HSA-73887                                                                    | 1/48   | 0.598308 | 0.821257 | 0 | 0 | 1.1107<br>52 | 0.570536 |
| Regulation of activated PAK-2p34 by proteasome mediated degradation Homo sapiens R-HSA-211733                         | 1/49   | 0.605878 | 0.826848 | 0 | 0 | 1.0875<br>56 | 0.544948 |
| Disease Homo sapiens R-HSA-1643685                                                                                    | 13/725 | 0.608912 | 0.826848 | 0 | 0 | 0.9512<br>49 | 0.471897 |
| Deadenylation-dependent mRNA decay Homo sapiens R-HSA-429914                                                          | 1/50   | 0.613306 | 0.826848 | 0 | 0 | 1.0653<br>06 | 0.520819 |
| CDK-mediated phosphorylation and removal of Cdc6 Homo sapiens R-HSA-69017                                             | 1/50   | 0.613306 | 0.826848 | 0 | 0 | 1.0653<br>06 | 0.520819 |
| Ubiquitin-dependent degradation of Cyclin D1 Homo sapiens R-HSA-69229                                                 | 1/50   | 0.613306 | 0.826848 | 0 | 0 | 1.0653<br>06 | 0.520819 |
| Ubiquitin-dependent degradation of Cyclin D Homo sapiens R-HSA-75815                                                  | 1/50   | 0.613306 | 0.826848 | 0 | 0 | 1.0653<br>06 | 0.520819 |
| Regulation of Apoptosis Homo sapiens R-HSA-169911                                                                     | 1/50   | 0.613306 | 0.826848 | 0 | 0 | 1.0653<br>06 | 0.520819 |
| Chromatin organization Homo sapiens R-HSA-4839726                                                                     | 4/226  | 0.617021 | 0.826848 | 0 | 0 | 0.9397<br>46 | 0.453759 |
| Chromatin modifying enzymes Homo sapiens R-HSA-3247509                                                                | 4/226  | 0.617021 | 0.826848 | 0 | 0 | 0.9397<br>46 | 0.453759 |
| FCERI mediated NF-kB activation Homo sapiens R-HSA-2871837                                                            | 2/111  | 0.620424 | 0.826848 | 0 | 0 | 0.9574<br>15 | 0.457024 |
| Neurotransmitter Release Cycle Homo sapiens R-HSA-112310                                                              | 1/51   | 0.620594 | 0.826848 | 0 | 0 | 1.0439<br>47 | 0.498044 |
| Vpu mediated degradation of CD4 Homo sapiens R-HSA-180534                                                             | 1/51   | 0.620594 | 0.826848 | 0 | 0 | 1.0439<br>47 | 0.498044 |

|                                                                                                       |       |          |          |   |   |              |          |
|-------------------------------------------------------------------------------------------------------|-------|----------|----------|---|---|--------------|----------|
| Autodegradation of the E3 ubiquitin ligase COP1 Homo sapiens R-HSA-349425                             | 1/51  | 0.620594 | 0.826848 | 0 | 0 | 1.0439<br>47 | 0.498044 |
| HDR through Homologous Recombination (HR) or Single Strand Annealing (SSA) Homo sapiens R-HSA-5693567 | 2/112 | 0.625301 | 0.826848 | 0 | 0 | 0.9486<br>63 | 0.445419 |
| Deposition of new CENPA-containing nucleosomes at the centromere Homo sapiens R-HSA-606279            | 1/52  | 0.627745 | 0.826848 | 0 | 0 | 1.0234<br>25 | 0.476528 |
| Nucleosome assembly Homo sapiens R-HSA-774815                                                         | 1/52  | 0.627745 | 0.826848 | 0 | 0 | 1.0234<br>25 | 0.476528 |
| Nonhomologous End-Joining (NHEJ) Homo sapiens R-HSA-5693571                                           | 1/52  | 0.627745 | 0.826848 | 0 | 0 | 1.0234<br>25 | 0.476528 |
| p53-Independent DNA Damage Response Homo sapiens R-HSA-69610                                          | 1/52  | 0.627745 | 0.826848 | 0 | 0 | 1.0234<br>25 | 0.476528 |
| p53-Independent G1/S DNA damage checkpoint Homo sapiens R-HSA-69613                                   | 1/52  | 0.627745 | 0.826848 | 0 | 0 | 1.0234<br>25 | 0.476528 |
| Ubiquitin Mediated Degradation of Phosphorylated Cdc25A Homo sapiens R-HSA-69601                      | 1/52  | 0.627745 | 0.826848 | 0 | 0 | 1.0234<br>25 | 0.476528 |
| Formation of TC-NER Pre-Incision Complex Homo sapiens R-HSA-6781823                                   | 1/53  | 0.634762 | 0.832726 | 0 | 0 | 1.0036<br>92 | 0.456184 |
| Vif-mediated degradation of APOBEC3G Homo sapiens R-HSA-180585                                        | 1/53  | 0.634762 | 0.832726 | 0 | 0 | 1.0036<br>92 | 0.456184 |
| Heparan sulfate/heparin (HS-GAG) metabolism Homo sapiens R-HSA-1638091                                | 1/54  | 0.641646 | 0.833373 | 0 | 0 | 0.9847<br>04 | 0.436931 |
| Meiotic recombination Homo sapiens R-HSA-912446                                                       | 1/54  | 0.641646 | 0.833373 | 0 | 0 | 0.9847<br>04 | 0.436931 |
| SCF-beta-TrCP mediated degradation of Emi1 Homo sapiens R-HSA-174113                                  | 1/54  | 0.641646 | 0.833373 | 0 | 0 | 0.9847<br>04 | 0.436931 |
| Stabilization of p53 Homo sapiens R-HSA-69541                                                         | 1/54  | 0.641646 | 0.833373 | 0 | 0 | 0.9847<br>04 | 0.436931 |
| Degradation of AXIN Homo sapiens R-HSA-4641257                                                        | 1/54  | 0.641646 | 0.833373 | 0 | 0 | 0.9847<br>04 | 0.436931 |
| RNA Polymerase I. RNA Polymerase III. and Mitochondrial Transcription Homo sapiens R-HSA-504046       | 2/116 | 0.644322 | 0.835185 | 0 | 0 | 0.9151<br>89 | 0.402277 |
| GABA receptor activation Homo sapiens R-HSA-977443                                                    | 1/55  | 0.648402 | 0.837144 | 0 | 0 | 0.9664<br>2  | 0.418696 |
| Regulation of cholesterol biosynthesis by SREBP                                                       | 1/55  | 0.648402 | 0.837144 | 0 | 0 | 0.9664<br>2  | 0.418696 |

|                                                                                     |       |          |          |   |   |              |          |
|-------------------------------------------------------------------------------------|-------|----------|----------|---|---|--------------|----------|
| (SREBF) Homo sapiens R-HSA-1655829                                                  |       |          |          |   |   |              |          |
| Homology Directed Repair Homo sapiens R-HSA-5693538                                 | 2/118 | 0.653544 | 0.839585 | 0 | 0 | 0.8993<br>18 | 0.382521 |
| TCR signaling Homo sapiens R-HSA-202403                                             | 2/118 | 0.653544 | 0.839585 | 0 | 0 | 0.8993<br>18 | 0.382521 |
| Degradation of DVL Homo sapiens R-HSA-4641258                                       | 1/56  | 0.65503  | 0.839585 | 0 | 0 | 0.9488       | 0.401413 |
| tRNA processing in the nucleus Homo sapiens R-HSA-6784531                           | 1/57  | 0.661534 | 0.839585 | 0 | 0 | 0.9318<br>1  | 0.385019 |
| Meiotic synapsis Homo sapiens R-HSA-1221632                                         | 1/57  | 0.661534 | 0.839585 | 0 | 0 | 0.9318<br>1  | 0.385019 |
| RNA Polymerase I Chain Elongation Homo sapiens R-HSA-73777                          | 1/57  | 0.661534 | 0.839585 | 0 | 0 | 0.9318<br>1  | 0.385019 |
| rRNA modification in the nucleus Homo sapiens R-HSA-6790901                         | 1/58  | 0.667915 | 0.839585 | 0 | 0 | 0.9154<br>15 | 0.369457 |
| Formation of the beta-catenin:TCF transactivating complex Homo sapiens R-HSA-201722 | 1/58  | 0.667915 | 0.839585 | 0 | 0 | 0.9154<br>15 | 0.369457 |
| B-WICH complex positively regulates rRNA expression Homo sapiens R-HSA-5250924      | 1/58  | 0.667915 | 0.839585 | 0 | 0 | 0.9154<br>15 | 0.369457 |
| NIK-->noncanonical NF-kB signaling Homo sapiens R-HSA-5676590                       | 1/58  | 0.667915 | 0.839585 | 0 | 0 | 0.9154<br>15 | 0.369457 |
| CDT1 association with the CDC6:ORC:origin complex Homo sapiens R-HSA-68827          | 1/58  | 0.667915 | 0.839585 | 0 | 0 | 0.9154<br>15 | 0.369457 |
| Cell Cycle Checkpoints Homo sapiens R-HSA-69620                                     | 3/182 | 0.668221 | 0.839585 | 0 | 0 | 0.8737<br>1  | 0.352224 |
| Telomere Maintenance Homo sapiens R-HSA-157579                                      | 1/59  | 0.674176 | 0.839585 | 0 | 0 | 0.8995<br>86 | 0.354674 |
| Degradation of GLI1 by the proteasome Homo sapiens R-HSA-5610780                    | 1/59  | 0.674176 | 0.839585 | 0 | 0 | 0.8995<br>86 | 0.354674 |
| GLI3 is processed to GLI3R by the proteasome Homo sapiens R-HSA-5610785             | 1/59  | 0.674176 | 0.839585 | 0 | 0 | 0.8995<br>86 | 0.354674 |
| Degradation of GLI2 by the proteasome Homo sapiens R-HSA-5610783                    | 1/59  | 0.674176 | 0.839585 | 0 | 0 | 0.8995<br>86 | 0.354674 |
| C-type lectin receptors (CLRs) Homo sapiens R-HSA-5621481                           | 2/123 | 0.675764 | 0.839585 | 0 | 0 | 0.8619<br>35 | 0.337802 |
| S Phase Homo sapiens R-HSA-69242                                                    | 2/124 | 0.680067 | 0.839585 | 0 | 0 | 0.8548<br>26 | 0.32959  |

|                                                                                    |             |          |          |   |   |              |          |
|------------------------------------------------------------------------------------|-------------|----------|----------|---|---|--------------|----------|
| Cleavage of Growing Transcript in the Termination Region Homo sapiens R-HSA-109688 | 1/60        | 0.68032  | 0.839585 | 0 | 0 | 0.8842<br>94 | 0.340623 |
| RNA Polymerase II Transcription Termination Homo sapiens R-HSA-73856               | 1/60        | 0.68032  | 0.839585 | 0 | 0 | 0.8842<br>94 | 0.340623 |
| Post-Elongation Processing of the Transcript Homo sapiens R-HSA-76044              | 1/60        | 0.68032  | 0.839585 | 0 | 0 | 0.8842<br>94 | 0.340623 |
| RHO GTPases activate PKNs Homo sapiens R-HSA-5625740                               | 1/60        | 0.68032  | 0.839585 | 0 | 0 | 0.8842<br>94 | 0.340623 |
| HDACs deacetylate histones Homo sapiens R-HSA-3214815                              | 1/60        | 0.68032  | 0.839585 | 0 | 0 | 0.8842<br>94 | 0.340623 |
| Immune System Homo sapiens R-HSA-168256                                            | 27/154<br>7 | 0.685598 | 0.839585 | 0 | 0 | 0.9214<br>45 | 0.347812 |
| Cell-cell junction organization Homo sapiens R-HSA-421270                          | 1/61        | 0.686348 | 0.839585 | 0 | 0 | 0.8695<br>11 | 0.327258 |
| Cell death signalling via NRAGE. NRIF and NADE Homo sapiens R-HSA-204998           | 1/61        | 0.686348 | 0.839585 | 0 | 0 | 0.8695<br>11 | 0.327258 |
| TP53 Regulates Transcription of DNA Repair Genes Homo sapiens R-HSA-6796648        | 1/61        | 0.686348 | 0.839585 | 0 | 0 | 0.8695<br>11 | 0.327258 |
| Dectin-1 mediated noncanonical NF-kB signaling Homo sapiens R-HSA-5607761          | 1/61        | 0.686348 | 0.839585 | 0 | 0 | 0.8695<br>11 | 0.327258 |
| Cytochrome P450 - arranged by substrate type Homo sapiens R-HSA-211897             | 1/62        | 0.692263 | 0.842081 | 0 | 0 | 0.8552<br>13 | 0.314539 |
| Gap-filling DNA repair synthesis and ligation in TC-NER Homo sapiens R-HSA-6782210 | 1/62        | 0.692263 | 0.842081 | 0 | 0 | 0.8552<br>13 | 0.314539 |
| Autodegradation of Cdh1 by Cdh1:APC/C Homo sapiens R-HSA-174084                    | 1/62        | 0.692263 | 0.842081 | 0 | 0 | 0.8552<br>13 | 0.314539 |
| Late Phase of HIV Life Cycle Homo sapiens R-HSA-162599                             | 2/128       | 0.696813 | 0.844414 | 0 | 0 | 0.8275<br>19 | 0.298931 |
| Dual incision in TC-NER Homo sapiens R-HSA-6782135                                 | 1/63        | 0.698066 | 0.844414 | 0 | 0 | 0.8413<br>76 | 0.302426 |
| Signaling by FGFR in disease Homo sapiens R-HSA-1226099                            | 1/63        | 0.698066 | 0.844414 | 0 | 0 | 0.8413<br>76 | 0.302426 |
| G alpha (q) signalling events Homo sapiens R-HSA-416476                            | 3/191       | 0.699652 | 0.844765 | 0 | 0 | 0.8314<br>98 | 0.296988 |
| HDR through Homologous Recombination (HRR) Homo sapiens R-HSA-5685942              | 1/64        | 0.70376  | 0.848155 | 0 | 0 | 0.8279<br>79 | 0.290883 |

|                                                                                                                                    |       |          |          |   |   |              |          |
|------------------------------------------------------------------------------------------------------------------------------------|-------|----------|----------|---|---|--------------|----------|
| Peptide ligand-binding receptors Homo sapiens R-HSA-375276                                                                         | 3/193 | 0.706322 | 0.849671 | 0 | 0 | 0.8226<br>61 | 0.286026 |
| ER-Phagosome pathway Homo sapiens R-HSA-1236974                                                                                    | 1/65  | 0.709347 | 0.851739 | 0 | 0 | 0.815        | 0.279879 |
| APC/C:Cdc20 mediated degradation of Securin Homo sapiens R-HSA-174154                                                              | 1/66  | 0.714829 | 0.855172 | 0 | 0 | 0.8024<br>21 | 0.269382 |
| Cytosolic sensors of pathogen-associated DNA Homo sapiens R-HSA-1834949                                                            | 1/66  | 0.714829 | 0.855172 | 0 | 0 | 0.8024<br>21 | 0.269382 |
| Regulation of RAS by GAPs Homo sapiens R-HSA-5658442                                                                               | 1/67  | 0.720208 | 0.857318 | 0 | 0 | 0.7902<br>22 | 0.259363 |
| Assembly of the pre-replicative complex Homo sapiens R-HSA-68867                                                                   | 1/67  | 0.720208 | 0.857318 | 0 | 0 | 0.7902<br>22 | 0.259363 |
| mRNA Splicing - Major Pathway Homo sapiens R-HSA-72163                                                                             | 2/134 | 0.720568 | 0.857318 | 0 | 0 | 0.7896<br>61 | 0.258784 |
| Antigen processing: Ubiquitination & Proteasome degradation Homo sapiens R-HSA-983168                                              | 4/260 | 0.723329 | 0.859036 | 0 | 0 | 0.8135<br>08 | 0.263488 |
| TCF dependent signaling in response to WNT Homo sapiens R-HSA-201681                                                               | 3/199 | 0.725651 | 0.859839 | 0 | 0 | 0.7972<br>31 | 0.255661 |
| Influenza Life Cycle Homo sapiens R-HSA-168255                                                                                     | 2/136 | 0.728131 | 0.859839 | 0 | 0 | 0.7777<br>96 | 0.246774 |
| Signaling by Hedgehog Homo sapiens R-HSA-5358351                                                                                   | 2/136 | 0.728131 | 0.859839 | 0 | 0 | 0.7777<br>96 | 0.246774 |
| Class A/1 (Rhodopsin-like receptors) Homo sapiens R-HSA-373076                                                                     | 5/323 | 0.729281 | 0.859839 | 0 | 0 | 0.8182<br>03 | 0.258304 |
| GPCR ligand binding Homo sapiens R-HSA-500792                                                                                      | 7/447 | 0.738871 | 0.868627 | 0 | 0 | 0.8271       | 0.250307 |
| APC/C:Cdh1 mediated degradation of Cdc20 and other APC/C:Cdh1 targeted proteins in late mitosis/early G1 Homo sapiens R-HSA-174178 | 1/71  | 0.740731 | 0.868627 | 0 | 0 | 0.7449<br>14 | 0.223562 |
| Cdc20:Phospho-APC/C mediated degradation of Cyclin A Homo sapiens R-HSA-174184                                                     | 1/71  | 0.740731 | 0.868627 | 0 | 0 | 0.7449<br>14 | 0.223562 |
| Transcriptional regulation by small RNAs Homo sapiens R-HSA-5578749                                                                | 1/72  | 0.745623 | 0.871229 | 0 | 0 | 0.7343<br>85 | 0.215568 |

|                                                                                                                                       |         |          |          |   |   |              |          |
|---------------------------------------------------------------------------------------------------------------------------------------|---------|----------|----------|---|---|--------------|----------|
| APC:Cdc20 mediated degradation of cell cycle proteins prior to satisfaction of the cell cycle checkpoint<br>Homo sapiens R-HSA-179419 | 1/72    | 0.745623 | 0.871229 | 0 | 0 | 0.7343<br>85 | 0.215568 |
| G alpha (s) signalling events<br>Homo sapiens R-HSA-418555                                                                            | 2/142   | 0.749787 | 0.872148 | 0 | 0 | 0.7442<br>32 | 0.214314 |
| Positive epigenetic regulation of rRNA expression<br>Homo sapiens R-HSA-5250913                                                       | 1/73    | 0.750422 | 0.872148 | 0 | 0 | 0.7241<br>48 | 0.207917 |
| NoRC negatively regulates rRNA expression<br>Homo sapiens R-HSA-427413                                                                | 1/73    | 0.750422 | 0.872148 | 0 | 0 | 0.7241<br>48 | 0.207917 |
| APC/C:Cdc20 mediated degradation of mitotic proteins<br>Homo sapiens R-HSA-176409                                                     | 1/74    | 0.755131 | 0.874731 | 0 | 0 | 0.7141<br>92 | 0.20059  |
| mRNA Splicing<br>Homo sapiens R-HSA-72172                                                                                             | 2/144   | 0.756669 | 0.874731 | 0 | 0 | 0.7336<br>75 | 0.20457  |
| Beta-catenin independent WNT signaling<br>Homo sapiens R-HSA-3858494                                                                  | 2/144   | 0.756669 | 0.874731 | 0 | 0 | 0.7336<br>75 | 0.20457  |
| Activation of APC/C and APC/C:Cdc20 mediated degradation of mitotic proteins<br>Homo sapiens R-HSA-176814                             | 1/75    | 0.759752 | 0.875533 | 0 | 0 | 0.7045<br>05 | 0.193572 |
| DNA Double-Strand Break Repair<br>Homo sapiens R-HSA-5693532                                                                          | 2/145   | 0.760048 | 0.875533 | 0 | 0 | 0.7285<br>07 | 0.199883 |
| Negative epigenetic regulation of rRNA expression<br>Homo sapiens R-HSA-5250941                                                       | 1/76    | 0.764286 | 0.875772 | 0 | 0 | 0.6950<br>76 | 0.186846 |
| RNA Polymerase I Promoter Clearance<br>Homo sapiens R-HSA-73854                                                                       | 1/76    | 0.764286 | 0.875772 | 0 | 0 | 0.6950<br>76 | 0.186846 |
| Transcription-Coupled Nucleotide Excision Repair (TC-NER)<br>Homo sapiens R-HSA-6781827                                               | 1/76    | 0.764286 | 0.875772 | 0 | 0 | 0.6950<br>76 | 0.186846 |
| Cell Cycle. Mitotic<br>Homo sapiens R-HSA-69278                                                                                       | 7/462   | 0.768782 | 0.877253 | 0 | 0 | 0.7992<br>08 | 0.21015  |
| Metabolism of vitamins and cofactors<br>Homo sapiens R-HSA-196854                                                                     | 2/148   | 0.769945 | 0.877253 | 0 | 0 | 0.7134<br>28 | 0.186516 |
| G2/M DNA damage checkpoint<br>Homo sapiens R-HSA-69473                                                                                | 1/78    | 0.773098 | 0.877253 | 0 | 0 | 0.6769<br>52 | 0.174213 |
| Signal Transduction<br>Homo sapiens R-HSA-162582                                                                                      | 42/2465 | 0.776066 | 0.877253 | 0 | 0 | 0.8926<br>95 | 0.226313 |

|                                                                                                    |       |          |          |   |   |              |          |
|----------------------------------------------------------------------------------------------------|-------|----------|----------|---|---|--------------|----------|
| G2/M Checkpoints Homo sapiens R-HSA-69481                                                          | 2/150 | 0.776343 | 0.877253 | 0 | 0 | 0.7037<br>14 | 0.178153 |
| PI3K Cascade Homo sapiens R-HSA-109704                                                             | 1/79  | 0.777381 | 0.877253 | 0 | 0 | 0.6682<br>39 | 0.168279 |
| Regulation of APC/C activators between G1/S and early anaphase Homo sapiens R-HSA-176408           | 1/79  | 0.777381 | 0.877253 | 0 | 0 | 0.6682<br>39 | 0.168279 |
| RIG-I/MDA5 mediated induction of IFN-alpha/beta pathways Homo sapiens R-HSA-168928                 | 1/79  | 0.777381 | 0.877253 | 0 | 0 | 0.6682<br>39 | 0.168279 |
| Fatty acid. triacylglycerol. and ketone body metabolism Homo sapiens R-HSA-535734                  | 3/217 | 0.777688 | 0.877253 | 0 | 0 | 0.7294<br>98 | 0.183418 |
| Complement cascade Homo sapiens R-HSA-166658                                                       | 1/80  | 0.781583 | 0.878876 | 0 | 0 | 0.6597<br>47 | 0.162584 |
| Extracellular matrix organization Homo sapiens R-HSA-1474244                                       | 4/283 | 0.781822 | 0.878876 | 0 | 0 | 0.7455<br>58 | 0.183503 |
| The citric acid (TCA) cycle and respiratory electron transport Homo sapiens R-HSA-1428517          | 2/153 | 0.78565  | 0.879667 | 0 | 0 | 0.6896<br>27 | 0.166368 |
| Peptide hormone metabolism Homo sapiens R-HSA-2980736                                              | 1/81  | 0.785705 | 0.879667 | 0 | 0 | 0.6514<br>67 | 0.157116 |
| Global Genome Nucleotide Excision Repair (GG-NER) Homo sapiens R-HSA-5696399                       | 1/82  | 0.789751 | 0.879667 | 0 | 0 | 0.6433<br>91 | 0.151865 |
| Degradation of beta-catenin by the destruction complex Homo sapiens R-HSA-195253                   | 1/82  | 0.789751 | 0.879667 | 0 | 0 | 0.6433<br>91 | 0.151865 |
| Antigen processing-Cross presentation Homo sapiens R-HSA-1236975                                   | 1/82  | 0.789751 | 0.879667 | 0 | 0 | 0.6433<br>91 | 0.151865 |
| HIV Infection Homo sapiens R-HSA-162906                                                            | 3/222 | 0.790621 | 0.879667 | 0 | 0 | 0.7126<br>59 | 0.16743  |
| p75 NTR receptor-mediated signalling Homo sapiens R-HSA-193704                                     | 1/83  | 0.793719 | 0.879689 | 0 | 0 | 0.6355<br>12 | 0.146819 |
| Immunoregulatory interactions between a Lymphoid and a non-Lymphoid cell Homo sapiens R-HSA-198933 | 2/157 | 0.797529 | 0.879689 | 0 | 0 | 0.6716<br>92 | 0.151962 |
| Mitochondrial translation initiation Homo sapiens R-HSA-5368286                                    | 1/84  | 0.797614 | 0.879689 | 0 | 0 | 0.6278<br>23 | 0.14197  |

|                                                                                      |       |          |          |   |   |              |          |
|--------------------------------------------------------------------------------------|-------|----------|----------|---|---|--------------|----------|
| Mitochondrial translation termination Homo sapiens R-HSA-5419276                     | 1/84  | 0.797614 | 0.879689 | 0 | 0 | 0.6278<br>23 | 0.14197  |
| Mitochondrial translation elongation Homo sapiens R-HSA-5389840                      | 1/84  | 0.797614 | 0.879689 | 0 | 0 | 0.6278<br>23 | 0.14197  |
| Meiosis Homo sapiens R-HSA-1500620                                                   | 1/85  | 0.801435 | 0.879689 | 0 | 0 | 0.6203<br>17 | 0.137309 |
| APC/C-mediated degradation of cell cycle proteins Homo sapiens R-HSA-174143          | 1/85  | 0.801435 | 0.879689 | 0 | 0 | 0.6203<br>17 | 0.137309 |
| Regulation of mitotic cell cycle Homo sapiens R-HSA-453276                           | 1/85  | 0.801435 | 0.879689 | 0 | 0 | 0.6203<br>17 | 0.137309 |
| Cell junction organization Homo sapiens R-HSA-446728                                 | 1/86  | 0.805183 | 0.880838 | 0 | 0 | 0.6129<br>88 | 0.132825 |
| Chromosome Maintenance Homo sapiens R-HSA-73886                                      | 1/86  | 0.805183 | 0.880838 | 0 | 0 | 0.6129<br>88 | 0.132825 |
| Signaling by Wnt Homo sapiens R-HSA-195721                                           | 4/295 | 0.808218 | 0.882677 | 0 | 0 | 0.7143<br>7  | 0.152106 |
| Apoptosis Homo sapiens R-HSA-109581                                                  | 2/163 | 0.814256 | 0.887784 | 0 | 0 | 0.6464<br>61 | 0.132835 |
| Regulation of TP53 Activity through Phosphorylation Homo sapiens R-HSA-6804756       | 1/89  | 0.816012 | 0.888213 | 0 | 0 | 0.592        | 0.120369 |
| Mitochondrial translation Homo sapiens R-HSA-5368287                                 | 1/90  | 0.819486 | 0.888957 | 0 | 0 | 0.5853<br>18 | 0.116524 |
| Vesicle-mediated transport Homo sapiens R-HSA-5653656                                | 7/492 | 0.820953 | 0.888957 | 0 | 0 | 0.7485<br>99 | 0.14769  |
| Major pathway of rRNA processing in the nucleolus Homo sapiens R-HSA-6791226         | 2/166 | 0.822149 | 0.888957 | 0 | 0 | 0.6345<br>38 | 0.124264 |
| Programmed Cell Death Homo sapiens R-HSA-5357801                                     | 2/166 | 0.822149 | 0.888957 | 0 | 0 | 0.6345<br>38 | 0.124264 |
| Class I MHC mediated antigen processing & presentation Homo sapiens R-HSA-983169     | 4/305 | 0.828181 | 0.893996 | 0 | 0 | 0.6902<br>8  | 0.130134 |
| L1CAM interactions Homo sapiens R-HSA-373760                                         | 1/96  | 0.839001 | 0.904179 | 0 | 0 | 0.5481<br>82 | 0.09623  |
| Regulation of actin dynamics for phagocytic cup formation Homo sapiens R-HSA-2029482 | 1/97  | 0.842042 | 0.90596  | 0 | 0 | 0.5424<br>44 | 0.09326  |
| Hedgehog 'off' state Homo sapiens R-HSA-5610787                                      | 1/99  | 0.847954 | 0.910817 | 0 | 0 | 0.5313<br>2  | 0.08763  |

|                                                                                                                                                              |        |          |          |   |   |              |          |
|--------------------------------------------------------------------------------------------------------------------------------------------------------------|--------|----------|----------|---|---|--------------|----------|
| Stimuli-sensing channels<br>Homo sapiens R-HSA-<br>2672351                                                                                                   | 1/100  | 0.850827 | 0.910901 | 0 | 0 | 0.5259<br>26 | 0.084962 |
| Phase II conjugation Homo<br>sapiens R-HSA-156580                                                                                                            | 1/100  | 0.850827 | 0.910901 | 0 | 0 | 0.5259<br>26 | 0.084962 |
| Adaptive Immune System<br>Homo sapiens R-HSA-<br>1280218                                                                                                     | 11/762 | 0.852384 | 0.910927 | 0 | 0 | 0.7573<br>57 | 0.120964 |
| Cell surface interactions at<br>the vascular wall Homo<br>sapiens R-HSA-202733                                                                               | 1/101  | 0.853645 | 0.910927 | 0 | 0 | 0.5206<br>4  | 0.082386 |
| rRNA processing Homo<br>sapiens R-HSA-72312                                                                                                                  | 2/180  | 0.855138 | 0.911103 | 0 | 0 | 0.5842<br>1  | 0.091424 |
| Platelet degranulation Homo<br>sapiens R-HSA-114608                                                                                                          | 1/105  | 0.864398 | 0.919392 | 0 | 0 | 0.5005<br>13 | 0.072936 |
| Assembly of the primary<br>cilium Homo sapiens R-HSA-<br>5617833                                                                                             | 2/187  | 0.869453 | 0.921785 | 0 | 0 | 0.5619<br>02 | 0.078605 |
| Mitotic Prophase Homo<br>sapiens R-HSA-68875                                                                                                                 | 1/107  | 0.869475 | 0.921785 | 0 | 0 | 0.4910<br>19 | 0.068677 |
| Nucleotide Excision Repair<br>Homo sapiens R-HSA-<br>5696398                                                                                                 | 1/108  | 0.871942 | 0.9229   | 0 | 0 | 0.4864<br>05 | 0.066653 |
| Respiratory electron<br>transport. ATP synthesis by<br>chemiosmotic coupling. and<br>heat production by<br>uncoupling proteins. Homo<br>sapiens R-HSA-163200 | 1/109  | 0.874363 | 0.923962 | 0 | 0 | 0.4818<br>77 | 0.064697 |
| Response to elevated platelet<br>cytosolic Ca <sup>2+</sup> Homo sapiens<br>R-HSA-76005                                                                      | 1/110  | 0.876738 | 0.924972 | 0 | 0 | 0.4774<br>31 | 0.062805 |
| Processing of Capped Intron-<br>Containing Pre-mRNA Homo<br>sapiens R-HSA-72203                                                                              | 2/193  | 0.880677 | 0.927628 | 0 | 0 | 0.5440<br>83 | 0.069133 |
| Epigenetic regulation of gene<br>expression Homo sapiens R-<br>HSA-212165                                                                                    | 1/115  | 0.887957 | 0.933787 | 0 | 0 | 0.4563<br>74 | 0.054232 |
| Fcgamma receptor (FCGR)<br>dependent phagocytosis<br>Homo sapiens R-HSA-<br>2029480                                                                          | 1/120  | 0.898158 | 0.941982 | 0 | 0 | 0.4370<br>87 | 0.046947 |
| Membrane Trafficking Homo<br>sapiens R-HSA-199991                                                                                                            | 5/420  | 0.898925 | 0.941982 | 0 | 0 | 0.6238<br>11 | 0.066471 |
| Glycosaminoglycan<br>metabolism Homo sapiens R-<br>HSA-1630316                                                                                               | 1/121  | 0.900084 | 0.941982 | 0 | 0 | 0.4334<br>22 | 0.045625 |
| Rho GTPase cycle Homo<br>sapiens R-HSA-194840                                                                                                                | 1/122  | 0.901974 | 0.942447 | 0 | 0 | 0.4298<br>18 | 0.044344 |
| RNA Polymerase II<br>Transcription Homo sapiens<br>R-HSA-73857                                                                                               | 1/124  | 0.905647 | 0.943819 | 0 | 0 | 0.4227<br>86 | 0.0419   |

|                                                                             |         |          |          |   |   |              |          |
|-----------------------------------------------------------------------------|---------|----------|----------|---|---|--------------|----------|
| DNA Repair Homo sapiens R-HSA-73894                                         | 3/285   | 0.906182 | 0.943819 | 0 | 0 | 0.5516<br>51 | 0.054346 |
| Cell Cycle Homo sapiens R-HSA-1640170                                       | 7/566   | 0.91063  | 0.946939 | 0 | 0 | 0.6469<br>89 | 0.06057  |
| Influenza Viral RNA Transcription and Replication Homo sapiens R-HSA-168273 | 1/128   | 0.912587 | 0.947463 | 0 | 0 | 0.4093<br>86 | 0.037447 |
| Host Interactions of HIV factors Homo sapiens R-HSA-162909                  | 1/129   | 0.914241 | 0.947671 | 0 | 0 | 0.4061<br>67 | 0.036417 |
| Cell-Cell communication Homo sapiens R-HSA-1500931                          | 1/131   | 0.917456 | 0.949494 | 0 | 0 | 0.3998<br>77 | 0.03445  |
| Cardiac conduction Homo sapiens R-HSA-5576891                               | 1/135   | 0.923529 | 0.954265 | 0 | 0 | 0.3878<br>61 | 0.030855 |
| Signaling by GPCR Homo sapiens R-HSA-372790                                 | 18/1293 | 0.930553 | 0.960001 | 0 | 0 | 0.7235<br>89 | 0.052081 |
| G alpha (i) signalling events Homo sapiens R-HSA-418594                     | 2/240   | 0.942159 | 0.970438 | 0 | 0 | 0.4355<br>82 | 0.025953 |
| Organelle biogenesis and maintenance Homo sapiens R-HSA-1852241             | 3/326   | 0.946479 | 0.97335  | 0 | 0 | 0.4806<br>07 | 0.026437 |
| Separation of Sister Chromatids Homo sapiens R-HSA-2467813                  | 1/162   | 0.954367 | 0.979917 | 0 | 0 | 0.3223<br>69 | 0.015057 |
| SLC-mediated transmembrane transport Homo sapiens R-HSA-425407              | 2/268   | 0.962947 | 0.983337 | 0 | 0 | 0.3891<br>68 | 0.014694 |
| M Phase Homo sapiens R-HSA-68886                                            | 2/268   | 0.962947 | 0.983337 | 0 | 0 | 0.3891<br>68 | 0.014694 |
| Mitotic Anaphase Homo sapiens R-HSA-68882                                   | 1/173   | 0.96303  | 0.983337 | 0 | 0 | 0.3015<br>81 | 0.011361 |
| Mitotic Metaphase and Anaphase Homo sapiens R-HSA-2555396                   | 1/174   | 0.963731 | 0.983337 | 0 | 0 | 0.2998<br>23 | 0.011076 |
| Intra-Golgi and retrograde Golgi-to-ER traffic Homo sapiens R-HSA-6811442   | 1/179   | 0.967042 | 0.985174 | 0 | 0 | 0.2913<br>26 | 0.009763 |
| Muscle contraction Homo sapiens R-HSA-397014                                | 1/196   | 0.976204 | 0.992956 | 0 | 0 | 0.2656<br>96 | 0.006399 |
| Ion channel transport Homo sapiens R-HSA-983712                             | 1/203   | 0.979192 | 0.993014 | 0 | 0 | 0.2563<br>96 | 0.005391 |
| Hemostasis Homo sapiens R-HSA-109582                                        | 5/552   | 0.979307 | 0.993014 | 0 | 0 | 0.4700<br>23 | 0.009828 |
| Platelet activation. signaling and aggregation Homo sapiens R-HSA-76002     | 1/253   | 0.992031 | 0.999956 | 0 | 0 | 0.2049<br>95 | 0.00164  |
| RHO GTPase Effectors Homo sapiens R-HSA-195258                              | 1/255   | 0.992331 | 0.999956 | 0 | 0 | 0.2033<br>6  | 0.001565 |
| Signaling by Rho GTPases Homo sapiens R-HSA-194315                          | 2/367   | 0.992774 | 0.999956 | 0 | 0 | 0.2821<br>62 | 0.002046 |

|                                                                      |         |          |          |   |   |          |          |
|----------------------------------------------------------------------|---------|----------|----------|---|---|----------|----------|
| Metabolism Homo sapiens R-HSA-1430728                                | 23/1908 | 0.993784 | 0.999956 | 0 | 0 | 0.613156 | 0.003823 |
| Transmembrane transport of small molecules Homo sapiens R-HSA-382551 | 4/594   | 0.996284 | 0.999956 | 0 | 0 | 0.346893 | 0.001292 |
| Metabolism of amino acids and derivatives Homo sapiens R-HSA-71291   | 1/335   | 0.998356 | 0.999956 | 0 | 0 | 0.154012 | 2.53E-04 |
| GPCR downstream signaling Homo sapiens R-HSA-388396                  | 7/983   | 0.999447 | 0.999956 | 0 | 0 | 0.362455 | 2.01E-04 |
| Metabolism of lipids and lipoproteins Homo sapiens R-HSA-556833      | 3/659   | 0.9997   | 0.999956 | 0 | 0 | 0.232557 | 6.98E-05 |
| Metabolism of proteins Homo sapiens R-HSA-392499                     | 6/1074  | 0.999956 | 0.999956 | 0 | 0 | 0.281749 | 1.24E-05 |

| siLonp_HS vs Ctrl                                                                                             |         |          |                  |             |                      |            |                |
|---------------------------------------------------------------------------------------------------------------|---------|----------|------------------|-------------|----------------------|------------|----------------|
| Term                                                                                                          | Overlap | P-value  | Adjusted P-value | Old P-value | Old Adjusted P-value | Odds Ratio | Combined Score |
| Attenuation phase Homo sapiens R-HSA-3371568                                                                  | 14/26   | 4.10E-17 | 2.94E-14         | 0           | 0                    | 53.2796    | 2010.43        |
| HSF1-dependent transactivation Homo sapiens R-HSA-3371571                                                     | 14/34   | 5.03E-15 | 1.80E-12         | 0           | 0                    | 31.95467   | 1052.079       |
| HSF1 activation Homo sapiens R-HSA-3371511                                                                    | 13/29   | 1.24E-14 | 2.96E-12         | 0           | 0                    | 37.01136   | 1185.178       |
| Regulation of HSF1-mediated heat shock response Homo sapiens R-HSA-3371453                                    | 17/80   | 1.49E-12 | 2.68E-10         | 0           | 0                    | 12.37778   | 337.0594       |
| Cellular response to heat stress Homo sapiens R-HSA-3371556                                                   | 18/96   | 3.15E-12 | 4.52E-10         | 0           | 0                    | 10.60232   | 280.7873       |
| Cellular responses to stress Homo sapiens R-HSA-2262752                                                       | 30/367  | 8.46E-10 | 1.01E-07         | 0           | 0                    | 4.153078   | 86.75814       |
| Generic Transcription Pathway Homo sapiens R-HSA-212436                                                       | 44/812  | 4.28E-08 | 4.39E-06         | 0           | 0                    | 2.7048     | 45.89384       |
| Senescence-Associated Secretory Phenotype (SASP) Homo sapiens R-HSA-2559582                                   | 9/77    | 4.95E-05 | 0.00444          | 0           | 0                    | 5.957411   | 59.06242       |
| Developmental Biology Homo sapiens R-HSA-1266738                                                              | 34/786  | 1.60E-04 | 0.012779         | 0           | 0                    | 2.083998   | 18.21254       |
| Receptor-ligand binding initiates the second proteolytic cleavage of Notch receptor Homo sapiens R-HSA-156988 | 4/14    | 1.98E-04 | 0.014184         | 0           | 0                    | 17.85205   | 152.2695       |

|                                                                                        |             |          |              |   |   |          |              |
|----------------------------------------------------------------------------------------|-------------|----------|--------------|---|---|----------|--------------|
| Negative regulation of MAPK pathway Homo sapiens R-HSA-5675221                         | 6/40        | 2.29E-04 | 0.014<br>62  | 0 | 0 | 7.902321 | 66.248<br>64 |
| Constitutive Signaling by NOTCH1 HD Domain Mutants Homo sapiens R-HSA-2691232          | 4/15        | 2.65E-04 | 0.014<br>62  | 0 | 0 | 16.22831 | 133.67<br>12 |
| Signaling by NOTCH1 HD Domain Mutants in Cancer Homo sapiens R-HSA-2691230             | 4/15        | 2.65E-04 | 0.014<br>62  | 0 | 0 | 16.22831 | 133.67<br>12 |
| NOTCH2 Activation and Transmission of Signal to the Nucleus Homo sapiens R-HSA-2979096 | 4/21        | 0.001045 | 0.052<br>789 | 0 | 0 | 10.49745 | 72.052<br>77 |
| Gene Expression Homo sapiens R-HSA-74160                                               | 55/163<br>1 | 0.001103 | 0.052<br>789 | 0 | 0 | 1.621562 | 11.042<br>63 |
| RAF-independent MAPK1/3 activation Homo sapiens R-HSA-112409                           | 4/23        | 0.001493 | 0.066<br>995 | 0 | 0 | 9.391492 | 61.110<br>56 |
| ATF4 activates genes Homo sapiens R-HSA-380994                                         | 4/25        | 0.00206  | 0.086<br>993 | 0 | 0 | 8.496195 | 52.550<br>55 |
| Downregulation of TGF-beta receptor signaling Homo sapiens R-HSA-2173788               | 4/26        | 0.002392 | 0.095<br>423 | 0 | 0 | 8.109589 | 48.945<br>72 |
| Cellular Senescence Homo sapiens R-HSA-2559583                                         | 10/161      | 0.003152 | 0.113<br>6   | 0 | 0 | 2.975074 | 17.135<br>73 |
| PERK regulates gene expression Homo sapiens R-HSA-381042                               | 4/28        | 0.003164 | 0.113<br>6   | 0 | 0 | 7.433029 | 42.783<br>1  |
| Amyloid fiber formation Homo sapiens R-HSA-977225                                      | 6/68        | 0.003882 | 0.132<br>73  | 0 | 0 | 4.327316 | 24.022<br>61 |
| Activated NOTCH1 Transmits Signal to the Nucleus Homo sapiens R-HSA-2122948            | 4/30        | 0.004091 | 0.133<br>511 | 0 | 0 | 6.860555 | 37.726<br>2  |
| TRAF6 mediated induction of TAK1 complex Homo sapiens R-HSA-937072                     | 3/16        | 0.004846 | 0.148<br>915 | 0 | 0 | 10.27422 | 54.758<br>14 |
| TGF-beta receptor signaling activates SMADs Homo sapiens R-HSA-2173789                 | 4/32        | 0.005185 | 0.148<br>915 | 0 | 0 | 6.369863 | 33.518<br>06 |
| Signaling by NOTCH2 Homo sapiens R-HSA-1980145                                         | 4/32        | 0.005185 | 0.148<br>915 | 0 | 0 | 6.369863 | 33.518<br>06 |
| AUF1 (hnRNP D0) binds and destabilizes mRNA Homo sapiens R-HSA-450408                  | 5/54        | 0.006701 | 0.170<br>622 | 0 | 0 | 4.55541  | 22.802<br>21 |
| Activation of IRF3/IRF7 mediated by TBK1/IKK epsilon Homo sapiens R-HSA-936964         | 3/18        | 0.006834 | 0.170<br>622 | 0 | 0 | 8.903417 | 44.391<br>44 |
| Scavenging by Class F Receptors Homo sapiens R-HSA-3000484                             | 2/6         | 0.006891 | 0.170<br>622 | 0 | 0 | 22.22045 | 110.60<br>18 |

|                                                                                                             |        |          |              |   |   |          |              |
|-------------------------------------------------------------------------------------------------------------|--------|----------|--------------|---|---|----------|--------------|
| Uptake and function of diphtheria toxin Homo sapiens R-HSA-5336415                                          | 2/6    | 0.006891 | 0.170<br>622 | 0 | 0 | 22.22045 | 110.60<br>18 |
| Constitutive Signaling by Ligand-Responsive EGFR Cancer Variants Homo sapiens R-HSA-1236382                 | 3/19   | 0.007984 | 0.175<br>295 | 0 | 0 | 8.346526 | 40.316<br>74 |
| Signaling by Ligand-Responsive EGFR Variants in Cancer Homo sapiens R-HSA-5637815                           | 3/19   | 0.007984 | 0.175<br>295 | 0 | 0 | 8.346526 | 40.316<br>74 |
| Signaling by EGFR in Cancer Homo sapiens R-HSA-1643713                                                      | 3/19   | 0.007984 | 0.175<br>295 | 0 | 0 | 8.346526 | 40.316<br>74 |
| Transcriptional regulation of white adipocyte differentiation Homo sapiens R-HSA-381340                     | 6/79   | 0.008057 | 0.175<br>295 | 0 | 0 | 3.673181 | 17.709<br>31 |
| Signaling by NOTCH1 t(7;9)(NOTCH1:M1580 K2555) Translocation Mutant Homo sapiens R-HSA-2660825              | 2/7    | 0.009508 | 0.195<br>04  | 0 | 0 | 17.77545 | 82.756<br>66 |
| Constitutive Signaling by NOTCH1 t(7;9)(NOTCH1:M1580 K2555) Translocation Mutant Homo sapiens R-HSA-2660826 | 2/7    | 0.009508 | 0.195<br>04  | 0 | 0 | 17.77545 | 82.756<br>66 |
| MAPK family signaling cascades Homo sapiens R-HSA-5683057                                                   | 13/284 | 0.010919 | 0.217<br>765 | 0 | 0 | 2.156659 | 9.7422<br>5  |
| Regulation of mRNA stability by proteins that bind AU-rich elements Homo sapiens R-HSA-450531               | 6/86   | 0.011992 | 0.224<br>24  | 0 | 0 | 3.350573 | 14.821<br>44 |
| VEGF ligand-receptor interactions Homo sapiens R-HSA-194313                                                 | 2/8    | 0.012492 | 0.224<br>24  | 0 | 0 | 14.81212 | 64.916<br>01 |
| VEGF binds to VEGFR leading to receptor dimerization Homo sapiens R-HSA-195399                              | 2/8    | 0.012492 | 0.224<br>24  | 0 | 0 | 14.81212 | 64.916<br>01 |
| Downregulation of ERBB4 signaling Homo sapiens R-HSA-1253288                                                | 2/8    | 0.012492 | 0.224<br>24  | 0 | 0 | 14.81212 | 64.916<br>01 |
| Signaling by SCF-KIT Homo sapiens R-HSA-1433557                                                             | 14/325 | 0.013816 | 0.237<br>299 | 0 | 0 | 2.024356 | 8.6682<br>12 |
| Signaling by VEGF Homo sapiens R-HSA-194138                                                                 | 14/328 | 0.014854 | 0.237<br>299 | 0 | 0 | 2.004703 | 8.4387<br>48 |
| IKK complex recruitment mediated by RIP1 Homo sapiens R-HSA-937041                                          | 3/24   | 0.015373 | 0.237<br>299 | 0 | 0 | 6.357631 | 26.543<br>91 |

|                                                                                                  |      |          |              |   |   |          |              |
|--------------------------------------------------------------------------------------------------|------|----------|--------------|---|---|----------|--------------|
| Oxidative Stress Induced Senescence Homo sapiens R-HSA-2559580                                   | 6/91 | 0.015521 | 0.237<br>299 | 0 | 0 | 3.152671 | 13.132<br>6  |
| PTK6 Regulates RTKs and Their Effectors AKT1 and DOK1 Homo sapiens R-HSA-8849469                 | 2/9  | 0.015829 | 0.237<br>299 | 0 | 0 | 12.69545 | 52.634<br>4  |
| MyD88:Mal cascade initiated on plasma membrane Homo sapiens R-HSA-166058                         | 6/92 | 0.016305 | 0.237<br>299 | 0 | 0 | 3.115852 | 12.825<br>75 |
| Toll Like Receptor TLR1:TLR2 Cascade Homo sapiens R-HSA-168179                                   | 6/92 | 0.016305 | 0.237<br>299 | 0 | 0 | 3.115852 | 12.825<br>75 |
| Toll Like Receptor TLR6:TLR2 Cascade Homo sapiens R-HSA-168188                                   | 6/92 | 0.016305 | 0.237<br>299 | 0 | 0 | 3.115852 | 12.825<br>75 |
| Toll Like Receptor 2 (TLR2) Cascade Homo sapiens R-HSA-181438                                    | 6/92 | 0.016305 | 0.237<br>299 | 0 | 0 | 3.115852 | 12.825<br>75 |
| Signaling by ERBB2 Homo sapiens R-HSA-1227986                                                    | 4/45 | 0.017174 | 0.237<br>299 | 0 | 0 | 4.347255 | 17.668<br>8  |
| Regulation of Hypoxia-inducible Factor (HIF) by oxygen Homo sapiens R-HSA-1234174                | 3/26 | 0.019119 | 0.237<br>299 | 0 | 0 | 5.804199 | 22.967<br>72 |
| Cellular response to hypoxia Homo sapiens R-HSA-2262749                                          | 3/26 | 0.019119 | 0.237<br>299 | 0 | 0 | 5.804199 | 22.967<br>72 |
| Activation of PPARGC1A (PGC-1alpha) by phosphorylation Homo sapiens R-HSA-2151209                | 2/10 | 0.0195   | 0.237<br>299 | 0 | 0 | 11.10795 | 43.736<br>08 |
| POU5F1 (OCT4). SOX2. NANOG repress genes related to differentiation Homo sapiens R-HSA-2892245   | 2/10 | 0.0195   | 0.237<br>299 | 0 | 0 | 11.10795 | 43.736<br>08 |
| IRAK2 mediated activation of TAK1 complex upon TLR7/8 or 9 stimulation Homo sapiens R-HSA-975163 | 2/10 | 0.0195   | 0.237<br>299 | 0 | 0 | 11.10795 | 43.736<br>08 |
| IRAK2 mediated activation of TAK1 complex Homo sapiens R-HSA-937042                              | 2/10 | 0.0195   | 0.237<br>299 | 0 | 0 | 11.10795 | 43.736<br>08 |
| Diseases of carbohydrate metabolism Homo sapiens R-HSA-5663084                                   | 2/10 | 0.0195   | 0.237<br>299 | 0 | 0 | 11.10795 | 43.736<br>08 |
| Myoclonic epilepsy of Lafora Homo sapiens R-HSA-3785653                                          | 2/10 | 0.0195   | 0.237<br>299 | 0 | 0 | 11.10795 | 43.736<br>08 |
| Glycogen storage diseases Homo sapiens R-HSA-3229121                                             | 2/10 | 0.0195   | 0.237<br>299 | 0 | 0 | 11.10795 | 43.736<br>08 |

|                                                                                |        |          |              |   |   |          |              |
|--------------------------------------------------------------------------------|--------|----------|--------------|---|---|----------|--------------|
| Axon guidance Homo sapiens R-HSA-422475                                        | 19/515 | 0.021094 | 0.251<br>711 | 0 | 0 | 1.726235 | 6.6611<br>5  |
| Signaling by NOTCH1 Homo sapiens R-HSA-1980143                                 | 5/72   | 0.021521 | 0.251<br>711 | 0 | 0 | 3.328495 | 12.777<br>19 |
| VEGFR2 mediated cell proliferation Homo sapiens R-HSA-5218921                  | 11/248 | 0.022549 | 0.251<br>711 | 0 | 0 | 2.080639 | 7.8899<br>38 |
| Transcriptional Regulation by TP53 Homo sapiens R-HSA-3700989                  | 14/348 | 0.023387 | 0.251<br>711 | 0 | 0 | 1.882702 | 7.0706<br>63 |
| Signaling by NOTCH3 Homo sapiens R-HSA-1980148                                 | 2/11   | 0.023488 | 0.251<br>711 | 0 | 0 | 9.873232 | 37.036<br>98 |
| Signaling by NOTCH4 Homo sapiens R-HSA-1980150                                 | 2/11   | 0.023488 | 0.251<br>711 | 0 | 0 | 9.873232 | 37.036<br>98 |
| Membrane binding and targetting of GAG proteins Homo sapiens R-HSA-174490      | 2/11   | 0.023488 | 0.251<br>711 | 0 | 0 | 9.873232 | 37.036<br>98 |
| Synthesis And Processing Of GAG. GAGPOL Polyproteins Homo sapiens R-HSA-174495 | 2/11   | 0.023488 | 0.251<br>711 | 0 | 0 | 9.873232 | 37.036<br>98 |
| Negative regulation of FGFR3 signaling Homo sapiens R-HSA-5654732              | 3/29   | 0.025598 | 0.264<br>466 | 0 | 0 | 5.133695 | 18.816<br>14 |
| VEGFA-VEGFR2 Pathway Homo sapiens R-HSA-4420097                                | 13/320 | 0.026378 | 0.264<br>466 | 0 | 0 | 1.900207 | 6.9077<br>11 |
| RNA Polymerase I Promoter Opening Homo sapiens R-HSA-73728                     | 3/30   | 0.027988 | 0.264<br>466 | 0 | 0 | 4.943305 | 17.677<br>12 |
| Fc epsilon receptor (FCERI) signaling Homo sapiens R-HSA-2454202               | 15/395 | 0.030333 | 0.264<br>466 | 0 | 0 | 1.772895 | 6.1972<br>02 |
| Packaging Of Telomere Ends Homo sapiens R-HSA-171306                           | 3/31   | 0.030492 | 0.264<br>466 | 0 | 0 | 4.766515 | 16.636<br>47 |
| Negative regulation of FGFR4 signaling Homo sapiens R-HSA-5654733              | 3/31   | 0.030492 | 0.264<br>466 | 0 | 0 | 4.766515 | 16.636<br>47 |
| Interleukin-3. 5 and GM-CSF signaling Homo sapiens R-HSA-512988                | 11/261 | 0.031178 | 0.264<br>466 | 0 | 0 | 1.971118 | 6.8359<br>43 |
| p75NTR recruits signalling complexes Homo sapiens R-HSA-209543                 | 2/13   | 0.032358 | 0.264<br>466 | 0 | 0 | 8.077273 | 27.712<br>36 |
| NF-kB is activated and signals survival Homo sapiens R-HSA-209560              | 2/13   | 0.032358 | 0.264<br>466 | 0 | 0 | 8.077273 | 27.712<br>36 |
| Assembly Of The HIV Virion Homo sapiens R-HSA-175474                           | 2/13   | 0.032358 | 0.264<br>466 | 0 | 0 | 8.077273 | 27.712<br>36 |
| Downregulation of ERBB2:ERBB3 signaling Homo sapiens R-HSA-1358803             | 2/13   | 0.032358 | 0.264<br>466 | 0 | 0 | 8.077273 | 27.712<br>36 |

|                                                                                    |        |          |              |   |   |          |              |
|------------------------------------------------------------------------------------|--------|----------|--------------|---|---|----------|--------------|
| DNA methylation Homo sapiens R-HSA-5334118                                         | 3/32   | 0.03311  | 0.264<br>466 | 0 | 0 | 4.601917 | 15.682<br>91 |
| Oncogene Induced Senescence Homo sapiens R-HSA-2559585                             | 3/32   | 0.03311  | 0.264<br>466 | 0 | 0 | 4.601917 | 15.682<br>91 |
| SMAD2/SMAD3:SMAD4 heterotrimer regulates transcription Homo sapiens R-HSA-2173796  | 3/32   | 0.03311  | 0.264<br>466 | 0 | 0 | 4.601917 | 15.682<br>91 |
| Negative regulation of FGFR1 signaling Homo sapiens R-HSA-5654726                  | 3/32   | 0.03311  | 0.264<br>466 | 0 | 0 | 4.601917 | 15.682<br>91 |
| NCAM signaling for neurite out-growth Homo sapiens R-HSA-375165                    | 11/266 | 0.035052 | 0.264<br>466 | 0 | 0 | 1.931969 | 6.4738<br>85 |
| GRB2 events in EGFR signaling Homo sapiens R-HSA-179812                            | 10/235 | 0.036703 | 0.264<br>466 | 0 | 0 | 1.988992 | 6.5734<br>16 |
| SHC1 events in EGFR signaling Homo sapiens R-HSA-180336                            | 10/235 | 0.036703 | 0.264<br>466 | 0 | 0 | 1.988992 | 6.5734<br>16 |
| SOS-mediated signalling Homo sapiens R-HSA-112412                                  | 10/235 | 0.036703 | 0.264<br>466 | 0 | 0 | 1.988992 | 6.5734<br>16 |
| SHC1 events in ERBB4 signaling Homo sapiens R-HSA-1250347                          | 10/235 | 0.036703 | 0.264<br>466 | 0 | 0 | 1.988992 | 6.5734<br>16 |
| RAF/MAP kinase cascade Homo sapiens R-HSA-5673001                                  | 10/235 | 0.036703 | 0.264<br>466 | 0 | 0 | 1.988992 | 6.5734<br>16 |
| Constitutive Signaling by NOTCH1 HD+PEST Domain Mutants Homo sapiens R-HSA-2894862 | 4/57   | 0.037112 | 0.264<br>466 | 0 | 0 | 3.360903 | 11.070<br>21 |
| Signaling by NOTCH1 in Cancer Homo sapiens R-HSA-2644603                           | 4/57   | 0.037112 | 0.264<br>466 | 0 | 0 | 3.360903 | 11.070<br>21 |
| Signaling by NOTCH1 PEST Domain Mutants in Cancer Homo sapiens R-HSA-2644602       | 4/57   | 0.037112 | 0.264<br>466 | 0 | 0 | 3.360903 | 11.070<br>21 |
| Constitutive Signaling by NOTCH1 PEST Domain Mutants Homo sapiens R-HSA-2644606    | 4/57   | 0.037112 | 0.264<br>466 | 0 | 0 | 3.360903 | 11.070<br>21 |
| Signaling by NOTCH1 HD+PEST Domain Mutants in Cancer Homo sapiens R-HSA-2894858    | 4/57   | 0.037112 | 0.264<br>466 | 0 | 0 | 3.360903 | 11.070<br>21 |
| FRS-mediated FGFR2 signaling Homo sapiens R-HSA-5654700                            | 10/236 | 0.037607 | 0.264<br>466 | 0 | 0 | 1.980088 | 6.4958<br>1  |

|                                                                                                                                      |        |          |              |   |   |          |              |
|--------------------------------------------------------------------------------------------------------------------------------------|--------|----------|--------------|---|---|----------|--------------|
| FRS-mediated FGFR4 signaling Homo sapiens R-HSA-5654712                                                                              | 10/236 | 0.037607 | 0.264<br>466 | 0 | 0 | 1.980088 | 6.4958<br>1  |
| FRS-mediated FGFR3 signaling Homo sapiens R-HSA-5654706                                                                              | 10/236 | 0.037607 | 0.264<br>466 | 0 | 0 | 1.980088 | 6.4958<br>1  |
| FRS-mediated FGFR1 signaling Homo sapiens R-HSA-5654693                                                                              | 10/236 | 0.037607 | 0.264<br>466 | 0 | 0 | 1.980088 | 6.4958<br>1  |
| Activated TLR4 signalling Homo sapiens R-HSA-166054                                                                                  | 6/112  | 0.038102 | 0.264<br>466 | 0 | 0 | 2.525359 | 8.2515<br>54 |
| Activated PKN1 stimulates transcription of AR (androgen receptor) regulated genes KLK2 and KLK3 Homo sapiens R-HSA-5625886           | 3/34   | 0.038685 | 0.264<br>466 | 0 | 0 | 4.304578 | 13.999<br>8  |
| Negative regulation of FGFR2 signaling Homo sapiens R-HSA-5654727                                                                    | 3/34   | 0.038685 | 0.264<br>466 | 0 | 0 | 4.304578 | 13.999<br>8  |
| Formation of the beta-catenin:TCF transactivating complex Homo sapiens R-HSA-201722                                                  | 4/58   | 0.039191 | 0.264<br>466 | 0 | 0 | 3.298495 | 10.684<br>82 |
| Recruitment and ATM-mediated phosphorylation of repair and signaling proteins at DNA double strand breaks Homo sapiens R-HSA-5693565 | 4/58   | 0.039191 | 0.264<br>466 | 0 | 0 | 3.298495 | 10.684<br>82 |
| ARMS-mediated activation Homo sapiens R-HSA-170984                                                                                   | 10/239 | 0.040411 | 0.264<br>466 | 0 | 0 | 1.953845 | 6.2691<br>93 |
| Signalling to p38 via RIT and RIN Homo sapiens R-HSA-187706                                                                          | 10/239 | 0.040411 | 0.264<br>466 | 0 | 0 | 1.953845 | 6.2691<br>93 |
| DNA Damage/Telomere Stress Induced Senescence Homo sapiens R-HSA-2559586                                                             | 4/59   | 0.041336 | 0.264<br>466 | 0 | 0 | 3.238356 | 10.317<br>47 |
| DNA Double Strand Break Response Homo sapiens R-HSA-5693606                                                                          | 4/59   | 0.041336 | 0.264<br>466 | 0 | 0 | 3.238356 | 10.317<br>47 |
| The role of GTSE1 in G2/M progression after G2 checkpoint Homo sapiens R-HSA-8852276                                                 | 4/59   | 0.041336 | 0.264<br>466 | 0 | 0 | 3.238356 | 10.317<br>47 |
| Frs2-mediated activation Homo sapiens R-HSA-170968                                                                                   | 10/240 | 0.041377 | 0.264<br>466 | 0 | 0 | 1.94525  | 6.1956<br>66 |
| SIRT1 negatively regulates rRNA Expression Homo sapiens R-HSA-427359                                                                 | 3/35   | 0.04164  | 0.264<br>466 | 0 | 0 | 4.169846 | 13.254<br>7  |

|                                                                                                                             |        |          |              |   |   |          |              |
|-----------------------------------------------------------------------------------------------------------------------------|--------|----------|--------------|---|---|----------|--------------|
| Fanconi Anemia Pathway<br>Homo sapiens R-HSA-<br>6783310                                                                    | 3/35   | 0.04164  | 0.264<br>466 | 0 | 0 | 4.169846 | 13.254<br>7  |
| Regulation of innate immune<br>responses to cytosolic DNA<br>Homo sapiens R-HSA-<br>3134975                                 | 2/15   | 0.042317 | 0.264<br>466 | 0 | 0 | 6.833916 | 21.612<br>76 |
| Association of licensing<br>factors with the pre-<br>replicative complex Homo<br>sapiens R-HSA-69298                        | 2/15   | 0.042317 | 0.264<br>466 | 0 | 0 | 6.833916 | 21.612<br>76 |
| NRIF signals cell death from<br>the nucleus Homo sapiens R-<br>HSA-205043                                                   | 2/15   | 0.042317 | 0.264<br>466 | 0 | 0 | 6.833916 | 21.612<br>76 |
| Glycogen synthesis Homo<br>sapiens R-HSA-3322077                                                                            | 2/15   | 0.042317 | 0.264<br>466 | 0 | 0 | 6.833916 | 21.612<br>76 |
| MAPK1/MAPK3 signaling<br>Homo sapiens R-HSA-<br>5684996                                                                     | 10/241 | 0.042359 | 0.264<br>466 | 0 | 0 | 1.936728 | 6.1231<br>19 |
| Prolonged ERK activation<br>events Homo sapiens R-HSA-<br>169893                                                            | 10/242 | 0.043356 | 0.267<br>231 | 0 | 0 | 1.928281 | 6.0515<br>36 |
| HDACs deacetylate histones<br>Homo sapiens R-HSA-<br>3214815                                                                | 4/60   | 0.043546 | 0.267<br>231 | 0 | 0 | 3.180365 | 9.9670<br>65 |
| Signaling by Leptin Homo<br>sapiens R-HSA-2586552                                                                           | 10/243 | 0.044369 | 0.269<br>503 | 0 | 0 | 1.919905 | 5.9809<br>01 |
| Interleukin receptor SHC<br>signaling Homo sapiens R-<br>HSA-912526                                                         | 10/245 | 0.046444 | 0.269<br>503 | 0 | 0 | 1.903369 | 5.8424<br>15 |
| Activation of anterior HOX<br>genes in hindbrain<br>development during early<br>embryogenesis Homo sapiens<br>R-HSA-5617472 | 5/89   | 0.047345 | 0.269<br>503 | 0 | 0 | 2.652555 | 8.0910<br>67 |
| Activation of HOX genes<br>during differentiation Homo<br>sapiens R-HSA-5619507                                             | 5/89   | 0.047345 | 0.269<br>503 | 0 | 0 | 2.652555 | 8.0910<br>67 |
| Signalling to RAS Homo<br>sapiens R-HSA-167044                                                                              | 10/246 | 0.047505 | 0.269<br>503 | 0 | 0 | 1.895206 | 5.7745<br>35 |
| TGF-beta receptor signaling in<br>EMT (epithelial to<br>mesenchymal transition)<br>Homo sapiens R-HSA-<br>2173791           | 2/16   | 0.04767  | 0.269<br>503 | 0 | 0 | 6.345455 | 19.312<br>13 |
| Translesion synthesis by REV1<br>Homo sapiens R-HSA-110312                                                                  | 2/16   | 0.04767  | 0.269<br>503 | 0 | 0 | 6.345455 | 19.312<br>13 |
| p75NTR signals via NF-kB<br>Homo sapiens R-HSA-193639                                                                       | 2/16   | 0.04767  | 0.269<br>503 | 0 | 0 | 6.345455 | 19.312<br>13 |
| Spry regulation of FGF<br>signaling Homo sapiens R-<br>HSA-1295596                                                          | 2/16   | 0.04767  | 0.269<br>503 | 0 | 0 | 6.345455 | 19.312<br>13 |

|                                                                                              |        |          |              |   |   |          |              |
|----------------------------------------------------------------------------------------------|--------|----------|--------------|---|---|----------|--------------|
| MAP3K8 (TPL2)-dependent MAPK1/3 activation Homo sapiens R-HSA-5684264                        | 2/16   | 0.04767  | 0.269<br>503 | 0 | 0 | 6.345455 | 19.312<br>13 |
| G1 Phase Homo sapiens R-HSA-69236                                                            | 3/38   | 0.05116  | 0.284<br>749 | 0 | 0 | 3.811845 | 11.331<br>87 |
| Cyclin D associated events in G1 Homo sapiens R-HSA-69231                                    | 3/38   | 0.05116  | 0.284<br>749 | 0 | 0 | 3.811845 | 11.331<br>87 |
| IRS-mediated signalling Homo sapiens R-HSA-112399                                            | 11/284 | 0.051789 | 0.285<br>346 | 0 | 0 | 1.802903 | 5.3376<br>46 |
| MAPK6/MAPK4 signaling Homo sapiens R-HSA-5687128                                             | 5/92   | 0.05323  | 0.285<br>346 | 0 | 0 | 2.560693 | 7.5108<br>49 |
| Unblocking of NMDA receptor. glutamate binding and activation Homo sapiens R-HSA-438066      | 2/17   | 0.053254 | 0.285<br>346 | 0 | 0 | 5.922121 | 17.367<br>71 |
| Translesion synthesis by POLK Homo sapiens R-HSA-5655862                                     | 2/17   | 0.053254 | 0.285<br>346 | 0 | 0 | 5.922121 | 17.367<br>71 |
| Translesion synthesis by POLI Homo sapiens R-HSA-5656121                                     | 2/17   | 0.053254 | 0.285<br>346 | 0 | 0 | 5.922121 | 17.367<br>71 |
| Toll Like Receptor 4 (TLR4) Cascade Homo sapiens R-HSA-166016                                | 6/122  | 0.053808 | 0.285<br>837 | 0 | 0 | 2.306469 | 6.7402<br>53 |
| Interleukin-2 signaling Homo sapiens R-HSA-451927                                            | 10/252 | 0.054216 | 0.285<br>837 | 0 | 0 | 1.847643 | 5.3854<br>57 |
| Insulin receptor signalling cascade Homo sapiens R-HSA-74751                                 | 11/287 | 0.055024 | 0.285<br>837 | 0 | 0 | 1.783029 | 5.1707<br>46 |
| Signalling to ERKs Homo sapiens R-HSA-187687                                                 | 10/253 | 0.055393 | 0.285<br>837 | 0 | 0 | 1.839944 | 5.3235<br>21 |
| IGF1R signaling cascade Homo sapiens R-HSA-2428924                                           | 11/288 | 0.056132 | 0.285<br>837 | 0 | 0 | 1.7765   | 5.1163<br>98 |
| Signaling by Type 1 Insulin-like Growth Factor 1 Receptor (IGF1R) Homo sapiens R-HSA-2404192 | 11/288 | 0.056132 | 0.285<br>837 | 0 | 0 | 1.7765   | 5.1163<br>98 |
| IRS-related events triggered by IGF1R Homo sapiens R-HSA-2428928                             | 11/288 | 0.056132 | 0.285<br>837 | 0 | 0 | 1.7765   | 5.1163<br>98 |
| FCERI mediated MAPK activation Homo sapiens R-HSA-2871796                                    | 11/289 | 0.057255 | 0.289<br>5   | 0 | 0 | 1.770018 | 5.0626<br>78 |
| PRC2 methylates histones and DNA Homo sapiens R-HSA-212300                                   | 3/40   | 0.058039 | 0.291<br>414 | 0 | 0 | 3.60543  | 10.263<br>34 |
| Oxygen-dependent proline hydroxylation of Hypoxia-                                           | 2/18   | 0.059056 | 0.294<br>462 | 0 | 0 | 5.551705 | 15.707<br>23 |

|                                                                                           |        |          |              |  |   |   |                          |
|-------------------------------------------------------------------------------------------|--------|----------|--------------|--|---|---|--------------------------|
| inducible Factor Alpha Homo sapiens R-HSA-1234176                                         |        |          |              |  |   |   |                          |
| Condensation of Prophase Chromosomes Homo sapiens R-HSA-2299718                           | 3/41   | 0.061634 | 0.304<br>548 |  | 0 | 0 | 3.51037<br>9.7817<br>75  |
| Downstream signaling of activated FGFR2 Homo sapiens R-HSA-5654696                        | 12/329 | 0.062776 | 0.304<br>548 |  | 0 | 0 | 1.693874<br>4.6889<br>55 |
| Downstream signaling of activated FGFR4 Homo sapiens R-HSA-5654716                        | 12/329 | 0.062776 | 0.304<br>548 |  | 0 | 0 | 1.693874<br>4.6889<br>55 |
| Downstream signaling of activated FGFR3 Homo sapiens R-HSA-5654708                        | 12/329 | 0.062776 | 0.304<br>548 |  | 0 | 0 | 1.693874<br>4.6889<br>55 |
| Signaling by ERBB4 Homo sapiens R-HSA-1236394                                             | 12/330 | 0.063912 | 0.307<br>98  |  | 0 | 0 | 1.68846<br>4.6436<br>76  |
| Regulation of TP53 Activity through Methylation Homo sapiens R-HSA-6804760                | 2/19   | 0.065065 | 0.308<br>601 |  | 0 | 0 | 5.224866<br>14.276<br>26 |
| Translesion Synthesis by POLH Homo sapiens R-HSA-110320                                   | 2/19   | 0.065065 | 0.308<br>601 |  | 0 | 0 | 5.224866<br>14.276<br>26 |
| Deactivation of the beta-catenin transactivating complex Homo sapiens R-HSA-3769402       | 3/42   | 0.065331 | 0.308<br>601 |  | 0 | 0 | 3.420186<br>9.3312<br>75 |
| Signaling by FGFR4 Homo sapiens R-HSA-5654743                                             | 12/332 | 0.066225 | 0.308<br>766 |  | 0 | 0 | 1.677733<br>4.5545<br>24 |
| Downstream signaling of activated FGFR1 Homo sapiens R-HSA-5654687                        | 12/332 | 0.066225 | 0.308<br>766 |  | 0 | 0 | 1.677733<br>4.5545<br>24 |
| Signaling by FGFR3 Homo sapiens R-HSA-5654741                                             | 12/333 | 0.067402 | 0.312<br>225 |  | 0 | 0 | 1.672419<br>4.5106<br>39 |
| TP53 Regulates Transcription of Cell Death Genes Homo sapiens R-HSA-5633008               | 3/43   | 0.069126 | 0.316<br>132 |  | 0 | 0 | 3.33451<br>8.9092<br>11  |
| ERCC6 (CSB) and EHMT2 (G9a) positively regulate rRNA expression Homo sapiens R-HSA-427389 | 3/43   | 0.069126 | 0.316<br>132 |  | 0 | 0 | 3.33451<br>8.9092<br>11  |
| Signaling by FGFR1 Homo sapiens R-HSA-5654736                                             | 12/336 | 0.071015 | 0.321<br>825 |  | 0 | 0 | 1.656675<br>4.3816<br>84 |
| Regulation of gene expression in beta cells Homo sapiens R-HSA-210745                     | 2/20   | 0.071268 | 0.321<br>825 |  | 0 | 0 | 4.934343<br>13.033<br>14 |
| Transcriptional activity of SMAD2/SMAD3:SMAD4 heterotrimer Homo sapiens R-HSA-2173793     | 3/44   | 0.07302  | 0.325<br>64  |  | 0 | 0 | 3.253014<br>8.5132<br>26 |
| Interleukin-1 signaling Homo sapiens R-HSA-446652                                         | 3/44   | 0.07302  | 0.325<br>64  |  | 0 | 0 | 3.253014<br>8.5132<br>26 |

|                                                                                                                                             |        |          |              |   |   |          |              |
|---------------------------------------------------------------------------------------------------------------------------------------------|--------|----------|--------------|---|---|----------|--------------|
| Downstream signal transduction Homo sapiens R-HSA-186763                                                                                    | 12/341 | 0.07731  | 0.337<br>909 | 0 | 0 | 1.631074 | 4.1754<br>43 |
| Regulation of FZD by ubiquitination Homo sapiens R-HSA-4641263                                                                              | 2/21   | 0.077653 | 0.337<br>909 | 0 | 0 | 4.674402 | 11.945<br>45 |
| TP53 regulates transcription of additional cell cycle genes whose exact role in the p53 pathway remain uncertain Homo sapiens R-HSA-6804115 | 2/21   | 0.077653 | 0.337<br>909 | 0 | 0 | 4.674402 | 11.945<br>45 |
| Aflatoxin activation and detoxification Homo sapiens R-HSA-5423646                                                                          | 2/21   | 0.077653 | 0.337<br>909 | 0 | 0 | 4.674402 | 11.945<br>45 |
| Signaling by TGF-beta Receptor Complex Homo sapiens R-HSA-170834                                                                            | 4/73   | 0.07813  | 0.337<br>934 | 0 | 0 | 2.579445 | 6.5760<br>04 |
| DAP12 signaling Homo sapiens R-HSA-2424491                                                                                                  | 12/344 | 0.081252 | 0.349<br>336 | 0 | 0 | 1.616083 | 4.0566<br>89 |
| SALM protein interactions at the synapse Homo sapiens R-HSA-8849932                                                                         | 2/22   | 0.08421  | 0.355<br>664 | 0 | 0 | 4.440455 | 10.987<br>64 |
| Pink/Parkin Mediated Mitophagy Homo sapiens R-HSA-5205685                                                                                   | 2/22   | 0.08421  | 0.355<br>664 | 0 | 0 | 4.440455 | 10.987<br>64 |
| Mitophagy Homo sapiens R-HSA-5205647                                                                                                        | 2/22   | 0.08421  | 0.355<br>664 | 0 | 0 | 4.440455 | 10.987<br>64 |
| NOTCH1 Intracellular Domain Regulates Transcription Homo sapiens R-HSA-2122947                                                              | 3/47   | 0.085266 | 0.358<br>016 | 0 | 0 | 3.030752 | 7.4616<br>63 |
| Signaling by Insulin receptor Homo sapiens R-HSA-74752                                                                                      | 11/311 | 0.085773 | 0.358<br>054 | 0 | 0 | 1.638345 | 4.0238<br>52 |
| TP53 Regulates Transcription of Cell Cycle Genes Homo sapiens R-HSA-6791312                                                                 | 3/48   | 0.08953  | 0.368<br>85  | 0 | 0 | 2.96325  | 7.1508<br>75 |
| Toll-Like Receptors Cascades Homo sapiens R-HSA-168898                                                                                      | 6/140  | 0.090682 | 0.368<br>85  | 0 | 0 | 1.994797 | 4.7882<br>93 |
| Gap-filling DNA repair synthesis and ligation in GG-NER Homo sapiens R-HSA-5696397                                                          | 2/23   | 0.090928 | 0.368<br>85  | 0 | 0 | 4.228788 | 10.139<br>31 |
| Downregulation of SMAD2/3:SMAD4 transcriptional activity Homo sapiens R-HSA-2173795                                                         | 2/23   | 0.090928 | 0.368<br>85  | 0 | 0 | 4.228788 | 10.139<br>31 |
| APC/C:Cdc20 mediated degradation of Cyclin B Homo sapiens R-HSA-174048                                                                      | 2/23   | 0.090928 | 0.368<br>85  | 0 | 0 | 4.228788 | 10.139<br>31 |
| Signaling by EGFR Homo sapiens R-HSA-177929                                                                                                 | 12/355 | 0.096776 | 0.387<br>945 | 0 | 0 | 1.56336  | 3.6509<br>99 |

|                                                                                                       |        |          |              |   |   |          |              |
|-------------------------------------------------------------------------------------------------------|--------|----------|--------------|---|---|----------|--------------|
| RNA Polymerase I Transcription Homo sapiens R-HSA-73864                                               | 4/79   | 0.097602 | 0.387<br>945 | 0 | 0 | 2.372359 | 5.5201<br>4  |
| Glucose metabolism Homo sapiens R-HSA-70326                                                           | 4/79   | 0.097602 | 0.387<br>945 | 0 | 0 | 2.372359 | 5.5201<br>4  |
| Endogenous sterols Homo sapiens R-HSA-211976                                                          | 2/24   | 0.097797 | 0.387<br>945 | 0 | 0 | 4.036364 | 9.3839<br>98 |
| HDR through Homologous Recombination (HR) or Single Strand Annealing (SSA) Homo sapiens R-HSA-5693567 | 5/112  | 0.10271  | 0.390<br>061 | 0 | 0 | 2.07992  | 4.7335<br>8  |
| DAP12 interactions Homo sapiens R-HSA-2172127                                                         | 12/359 | 0.102838 | 0.390<br>061 | 0 | 0 | 1.545017 | 3.5142<br>89 |
| Processing of DNA double-strand break ends Homo sapiens R-HSA-5693607                                 | 4/81   | 0.104552 | 0.390<br>061 | 0 | 0 | 2.310502 | 5.2172<br>87 |
| Constitutive Signaling by AKT1 E17K in Cancer Homo sapiens R-HSA-5674400                              | 2/25   | 0.104806 | 0.390<br>061 | 0 | 0 | 3.860672 | 8.7082<br>99 |
| Budding and maturation of HIV virion Homo sapiens R-HSA-162588                                        | 2/25   | 0.104806 | 0.390<br>061 | 0 | 0 | 3.860672 | 8.7082<br>99 |
| APC-Cdc20 mediated degradation of Nek2A Homo sapiens R-HSA-179409                                     | 2/25   | 0.104806 | 0.390<br>061 | 0 | 0 | 3.860672 | 8.7082<br>99 |
| Abacavir metabolism Homo sapiens R-HSA-2161541                                                        | 1/5    | 0.105732 | 0.390<br>061 | 0 | 0 | 11.08503 | 24.906<br>34 |
| Na+-dependent glucose transporters Homo sapiens R-HSA-428808                                          | 1/5    | 0.105732 | 0.390<br>061 | 0 | 0 | 11.08503 | 24.906<br>34 |
| The fatty acid cycling model Homo sapiens R-HSA-167826                                                | 1/5    | 0.105732 | 0.390<br>061 | 0 | 0 | 11.08503 | 24.906<br>34 |
| The proton buffering model Homo sapiens R-HSA-167827                                                  | 1/5    | 0.105732 | 0.390<br>061 | 0 | 0 | 11.08503 | 24.906<br>34 |
| Mitochondrial Uncoupling Proteins Homo sapiens R-HSA-166187                                           | 1/5    | 0.105732 | 0.390<br>061 | 0 | 0 | 11.08503 | 24.906<br>34 |
| Signaling by FGFR2 Homo sapiens R-HSA-5654738                                                         | 12/361 | 0.105953 | 0.390<br>061 | 0 | 0 | 1.536003 | 3.4479<br>61 |
| Diseases of signal transduction Homo sapiens R-HSA-5663202                                            | 10/288 | 0.107359 | 0.390<br>061 | 0 | 0 | 1.605382 | 3.5825<br>39 |
| Deposition of new CENPA-containing nucleosomes at the centromere Homo sapiens R-HSA-606279            | 3/52   | 0.107439 | 0.390<br>061 | 0 | 0 | 2.720794 | 6.0696<br>44 |
| Nucleosome assembly Homo sapiens R-HSA-774815                                                         | 3/52   | 0.107439 | 0.390<br>061 | 0 | 0 | 2.720794 | 6.0696<br>44 |
| Toll Like Receptor 10 (TLR10) Cascade Homo sapiens R-HSA-168142                                       | 4/82   | 0.108109 | 0.390<br>061 | 0 | 0 | 2.280763 | 5.0738<br>24 |

|                                                                                                        |        |          |          |   |   |          |          |
|--------------------------------------------------------------------------------------------------------|--------|----------|----------|---|---|----------|----------|
| Toll Like Receptor 5 (TLR5) Cascade Homo sapiens R-HSA-168176                                          | 4/82   | 0.108109 | 0.390061 | 0 | 0 | 2.280763 | 5.073824 |
| MyD88 cascade initiated on plasma membrane Homo sapiens R-HSA-975871                                   | 4/82   | 0.108109 | 0.390061 | 0 | 0 | 2.280763 | 5.073824 |
| Signaling by PDGF Homo sapiens R-HSA-186797                                                            | 12/364 | 0.110728 | 0.397514 | 0 | 0 | 1.522674 | 3.350917 |
| TRAF6 mediated induction of NFkB and MAP kinases upon TLR7/8 or 9 activation Homo sapiens R-HSA-975138 | 4/83   | 0.11172  | 0.399079 | 0 | 0 | 2.251777 | 4.935355 |
| Signaling by FGFR Homo sapiens R-HSA-190236                                                            | 12/366 | 0.11398  | 0.405138 | 0 | 0 | 1.513914 | 3.287811 |
| TP53 Regulates Metabolic Genes Homo sapiens R-HSA-5628897                                              | 4/84   | 0.115384 | 0.408108 | 0 | 0 | 2.223516 | 4.801656 |
| Meiotic recombination Homo sapiens R-HSA-912446                                                        | 3/54   | 0.116874 | 0.409533 | 0 | 0 | 2.613828 | 5.610989 |
| MyD88 dependent cascade initiated on endosome Homo sapiens R-HSA-975155                                | 4/85   | 0.119101 | 0.409533 | 0 | 0 | 2.195952 | 4.67252  |
| Toll Like Receptor 7/8 (TLR7/8) Cascade Homo sapiens R-HSA-168181                                      | 4/85   | 0.119101 | 0.409533 | 0 | 0 | 2.195952 | 4.67252  |
| Uptake and actions of bacterial toxins Homo sapiens R-HSA-5339562                                      | 2/27   | 0.119209 | 0.409533 | 0 | 0 | 3.551455 | 7.553496 |
| EGFR downregulation Homo sapiens R-HSA-182971                                                          | 2/27   | 0.119209 | 0.409533 | 0 | 0 | 3.551455 | 7.553496 |
| Synthesis of bile acids and bile salts Homo sapiens R-HSA-192105                                       | 2/27   | 0.119209 | 0.409533 | 0 | 0 | 3.551455 | 7.553496 |
| Homology Directed Repair Homo sapiens R-HSA-5693538                                                    | 5/118  | 0.120864 | 0.413241 | 0 | 0 | 1.968875 | 4.1604   |
| Hh mutants that don't undergo autocatalytic processing are degraded by ERAD Homo sapiens R-HSA-5362768 | 3/55   | 0.121705 | 0.414142 | 0 | 0 | 2.563431 | 5.398989 |
| Unfolded Protein Response (UPR) Homo sapiens R-HSA-381119                                              | 4/86   | 0.122868 | 0.414175 | 0 | 0 | 2.169061 | 4.547749 |
| PI3K/AKT Signaling in Cancer Homo sapiens R-HSA-2219528                                                | 4/86   | 0.122868 | 0.414175 | 0 | 0 | 2.169061 | 4.547749 |
| Recognition of DNA damage by PCNA-containing replication complex Homo sapiens R-HSA-110314             | 2/28   | 0.126585 | 0.419173 | 0 | 0 | 3.414685 | 7.057607 |

|                                                                                    |        |          |              |   |   |          |              |
|------------------------------------------------------------------------------------|--------|----------|--------------|---|---|----------|--------------|
| Endosomal Sorting Complex Required For Transport (ESCRT) Homo sapiens R-HSA-917729 | 2/28   | 0.126585 | 0.419<br>173 | 0 | 0 | 3.414685 | 7.0576<br>07 |
| Chemokine receptors bind chemokines Homo sapiens R-HSA-380108                      | 3/56   | 0.126607 | 0.419<br>173 | 0 | 0 | 2.514935 | 5.1975<br>34 |
| Regulation of PLK1 Activity at G2/M Transition Homo sapiens R-HSA-2565942          | 4/87   | 0.126686 | 0.419<br>173 | 0 | 0 | 2.142818 | 4.4271<br>56 |
| NGF signalling via TRKA from the plasma membrane Homo sapiens R-HSA-187037         | 12/374 | 0.127537 | 0.420<br>052 | 0 | 0 | 1.479841 | 3.0475<br>11 |
| Toll Like Receptor 9 (TLR9) Cascade Homo sapiens R-HSA-168138                      | 4/88   | 0.130553 | 0.425<br>557 | 0 | 0 | 2.117199 | 4.3105<br>64 |
| Meiotic synapsis Homo sapiens R-HSA-1221632                                        | 3/57   | 0.131579 | 0.425<br>557 | 0 | 0 | 2.468236 | 5.0059<br>47 |
| RNA Polymerase I Chain Elongation Homo sapiens R-HSA-73777                         | 3/57   | 0.131579 | 0.425<br>557 | 0 | 0 | 2.468236 | 5.0059<br>47 |
| Hh mutants abrogate ligand secretion Homo sapiens R-HSA-5387390                    | 3/57   | 0.131579 | 0.425<br>557 | 0 | 0 | 2.468236 | 5.0059<br>47 |
| Signaling by NOTCH Homo sapiens R-HSA-157118                                       | 5/122  | 0.133744 | 0.430<br>232 | 0 | 0 | 1.901172 | 3.8248<br>27 |
| Downstream signaling events of B Cell Receptor (BCR) Homo sapiens R-HSA-1168372    | 7/192  | 0.134223 | 0.430<br>232 | 0 | 0 | 1.685132 | 3.3841<br>73 |
| B-WICH complex positively regulates rRNA expression Homo sapiens R-HSA-5250924     | 3/58   | 0.136618 | 0.435<br>964 | 0 | 0 | 2.423235 | 4.8236<br>04 |
| Termination of translesion DNA synthesis Homo sapiens R-HSA-5656169                | 2/30   | 0.141643 | 0.446<br>302 | 0 | 0 | 3.170455 | 6.1964<br>87 |
| Telomere Maintenance Homo sapiens R-HSA-157579                                     | 3/59   | 0.141723 | 0.446<br>302 | 0 | 0 | 2.379841 | 4.6499<br>29 |
| SCF(Skp2)-mediated degradation of p27/p21 Homo sapiens R-HSA-187577                | 3/59   | 0.141723 | 0.446<br>302 | 0 | 0 | 2.379841 | 4.6499<br>29 |
| Inositol transporters Homo sapiens R-HSA-429593                                    | 1/7    | 0.144833 | 0.452<br>13  | 0 | 0 | 7.389267 | 14.277<br>36 |
| PTK6 promotes HIF1A stabilization Homo sapiens R-HSA-8857538                       | 1/7    | 0.144833 | 0.452<br>13  | 0 | 0 | 7.389267 | 14.277<br>36 |
| Phase 1 - Functionalization of compounds Homo sapiens R-HSA-211945                 | 4/92   | 0.146497 | 0.452<br>648 | 0 | 0 | 2.020548 | 3.8809<br>73 |

|                                                                                                 |        |          |              |   |   |          |              |
|-------------------------------------------------------------------------------------------------|--------|----------|--------------|---|---|----------|--------------|
| RHO GTPases activate PKNs<br>Homo sapiens R-HSA-<br>5625740                                     | 3/60   | 0.14689  | 0.452<br>648 | 0 | 0 | 2.337969 | 4.4843<br>92 |
| MAP kinase activation in TLR<br>cascade Homo sapiens R-HSA-<br>450294                           | 3/60   | 0.14689  | 0.452<br>648 | 0 | 0 | 2.337969 | 4.4843<br>92 |
| HS-GAG biosynthesis Homo<br>sapiens R-HSA-2022928                                               | 2/31   | 0.149308 | 0.456<br>184 | 0 | 0 | 3.060972 | 5.8211<br>8  |
| Regulation of TNFR1 signaling<br>Homo sapiens R-HSA-<br>5357905                                 | 2/31   | 0.149308 | 0.456<br>184 | 0 | 0 | 3.060972 | 5.8211<br>8  |
| Biological oxidations Homo<br>sapiens R-HSA-211859                                              | 7/199  | 0.15286  | 0.465<br>058 | 0 | 0 | 1.623108 | 3.0485<br>72 |
| Regulation of beta-cell<br>development Homo sapiens<br>R-HSA-186712                             | 2/32   | 0.157055 | 0.466<br>525 | 0 | 0 | 2.958788 | 5.4771<br>92 |
| EPH-Ephrin signaling Homo<br>sapiens R-HSA-2682334                                              | 4/95   | 0.158925 | 0.466<br>525 | 0 | 0 | 1.953635 | 3.5933<br>72 |
| Signaling by Interleukins<br>Homo sapiens R-HSA-449147                                          | 12/392 | 0.16115  | 0.466<br>525 | 0 | 0 | 1.408421 | 2.5709<br>6  |
| Circadian Clock Homo sapiens<br>R-HSA-400253                                                    | 3/63   | 0.162745 | 0.466<br>525 | 0 | 0 | 2.220729 | 4.0318<br>85 |
| p53-Dependent G1/S DNA<br>damage checkpoint Homo<br>sapiens R-HSA-69580                         | 3/63   | 0.162745 | 0.466<br>525 | 0 | 0 | 2.220729 | 4.0318<br>85 |
| p53-Dependent G1 DNA<br>Damage Response Homo<br>sapiens R-HSA-69563                             | 3/63   | 0.162745 | 0.466<br>525 | 0 | 0 | 2.220729 | 4.0318<br>85 |
| Asymmetric localization of<br>PCP proteins Homo sapiens R-<br>HSA-4608870                       | 3/63   | 0.162745 | 0.466<br>525 | 0 | 0 | 2.220729 | 4.0318<br>85 |
| Gastrin-CREB signalling<br>pathway via PKC and MAPK<br>Homo sapiens R-HSA-881907                | 13/432 | 0.162904 | 0.466<br>525 | 0 | 0 | 1.384176 | 2.5117<br>14 |
| Erythrocytes take up oxygen<br>and release carbon dioxide<br>Homo sapiens R-HSA-<br>1247673     | 1/8    | 0.163739 | 0.466<br>525 | 0 | 0 | 6.333333 | 11.460<br>06 |
| Sema4D mediated inhibition<br>of cell attachment and<br>migration Homo sapiens R-<br>HSA-416550 | 1/8    | 0.163739 | 0.466<br>525 | 0 | 0 | 6.333333 | 11.460<br>06 |
| Terminal pathway of<br>complement Homo sapiens R-<br>HSA-166665                                 | 1/8    | 0.163739 | 0.466<br>525 | 0 | 0 | 6.333333 | 11.460<br>06 |
| Release of Hh-Np from the<br>secreting cell Homo sapiens<br>R-HSA-5362798                       | 1/8    | 0.163739 | 0.466<br>525 | 0 | 0 | 6.333333 | 11.460<br>06 |
| Ligand-receptor interactions<br>Homo sapiens R-HSA-<br>5632681                                  | 1/8    | 0.163739 | 0.466<br>525 | 0 | 0 | 6.333333 | 11.460<br>06 |

|                                                                                              |      |          |              |   |   |          |              |
|----------------------------------------------------------------------------------------------|------|----------|--------------|---|---|----------|--------------|
| AMPK inhibits chREBP transcriptional activation activity Homo sapiens R-HSA-163680           | 1/8  | 0.163739 | 0.466<br>525 | 0 | 0 | 6.333333 | 11.460<br>06 |
| NR1D1 (REV-ERBA) represses gene expression Homo sapiens R-HSA-1368071                        | 1/8  | 0.163739 | 0.466<br>525 | 0 | 0 | 6.333333 | 11.460<br>06 |
| Synthesis of epoxy (EET) and dihydroxyeicosatrienoic acids (DHET) Homo sapiens R-HSA-2142670 | 1/8  | 0.163739 | 0.466<br>525 | 0 | 0 | 6.333333 | 11.460<br>06 |
| Visual phototransduction Homo sapiens R-HSA-2187338                                          | 4/97 | 0.167418 | 0.467<br>927 | 0 | 0 | 1.911425 | 3.4162<br>12 |
| MyD88-independent TLR3/TLR4 cascade Homo sapiens R-HSA-166166                                | 4/97 | 0.167418 | 0.467<br>927 | 0 | 0 | 1.911425 | 3.4162<br>12 |
| Toll Like Receptor 3 (TLR3) Cascade Homo sapiens R-HSA-168164                                | 4/97 | 0.167418 | 0.467<br>927 | 0 | 0 | 1.911425 | 3.4162<br>12 |
| TRIF-mediated TLR3/TLR4 signaling Homo sapiens R-HSA-937061                                  | 4/97 | 0.167418 | 0.467<br>927 | 0 | 0 | 1.911425 | 3.4162<br>12 |
| HDR through Homologous Recombination (HRR) Homo sapiens R-HSA-5685942                        | 3/64 | 0.168141 | 0.467<br>927 | 0 | 0 | 2.184212 | 3.8943<br>47 |
| Hedgehog ligand biogenesis Homo sapiens R-HSA-5358346                                        | 3/64 | 0.168141 | 0.467<br>927 | 0 | 0 | 2.184212 | 3.8943<br>47 |
| EPHA-mediated growth cone collapse Homo sapiens R-HSA-3928663                                | 2/34 | 0.172762 | 0.477<br>089 | 0 | 0 | 2.77358  | 4.8699<br>65 |
| Negative regulators of RIG-I/MDA5 signaling Homo sapiens R-HSA-936440                        | 2/34 | 0.172762 | 0.477<br>089 | 0 | 0 | 2.77358  | 4.8699<br>65 |
| G1/S DNA Damage Checkpoints Homo sapiens R-HSA-69615                                         | 3/65 | 0.173588 | 0.477<br>533 | 0 | 0 | 2.148872 | 3.7628<br>29 |
| Activation of NF-kappaB in B cells Homo sapiens R-HSA-1169091                                | 3/66 | 0.179084 | 0.479<br>265 | 0 | 0 | 2.114655 | 3.6369<br>97 |
| Lysosome Vesicle Biogenesis Homo sapiens R-HSA-432720                                        | 2/35 | 0.180709 | 0.479<br>265 | 0 | 0 | 2.689394 | 4.6012<br>01 |
| Bile acid and bile salt metabolism Homo sapiens R-HSA-194068                                 | 2/35 | 0.180709 | 0.479<br>265 | 0 | 0 | 2.689394 | 4.6012<br>01 |
| Regulation of TP53 Degradation Homo sapiens R-HSA-6804757                                    | 2/35 | 0.180709 | 0.479<br>265 | 0 | 0 | 2.689394 | 4.6012<br>01 |
| Sperm Motility And Taxes Homo sapiens R-HSA-1300642                                          | 1/9  | 0.182227 | 0.479<br>265 | 0 | 0 | 5.541383 | 9.4342<br>05 |

|                                                                                                              |       |          |              |   |   |          |              |
|--------------------------------------------------------------------------------------------------------------|-------|----------|--------------|---|---|----------|--------------|
| CHL1 interactions Homo sapiens R-HSA-447041                                                                  | 1/9   | 0.182227 | 0.479<br>265 | 0 | 0 | 5.541383 | 9.4342<br>05 |
| Ca2+ activated K+ channels Homo sapiens R-HSA-1296052                                                        | 1/9   | 0.182227 | 0.479<br>265 | 0 | 0 | 5.541383 | 9.4342<br>05 |
| Prostanoid ligand receptors Homo sapiens R-HSA-391908                                                        | 1/9   | 0.182227 | 0.479<br>265 | 0 | 0 | 5.541383 | 9.4342<br>05 |
| AKT phosphorylates targets in the nucleus Homo sapiens R-HSA-198693                                          | 1/9   | 0.182227 | 0.479<br>265 | 0 | 0 | 5.541383 | 9.4342<br>05 |
| Synthesis of (16-20)-hydroxyeicosatetraenoic acids (HETE) Homo sapiens R-HSA-2142816                         | 1/9   | 0.182227 | 0.479<br>265 | 0 | 0 | 5.541383 | 9.4342<br>05 |
| Highly calcium permeable nicotinic acetylcholine receptors Homo sapiens R-HSA-629597                         | 1/9   | 0.182227 | 0.479<br>265 | 0 | 0 | 5.541383 | 9.4342<br>05 |
| EGFR Transactivation by Gastrin Homo sapiens R-HSA-2179392                                                   | 1/9   | 0.182227 | 0.479<br>265 | 0 | 0 | 5.541383 | 9.4342<br>05 |
| Semaphorin interactions Homo sapiens R-HSA-373755                                                            | 3/67  | 0.184627 | 0.480<br>928 | 0 | 0 | 2.081506 | 3.5165<br>35 |
| Signaling by PTK6 Homo sapiens R-HSA-8848021                                                                 | 3/67  | 0.184627 | 0.480<br>928 | 0 | 0 | 2.081506 | 3.5165<br>35 |
| Gene Silencing by RNA Homo sapiens R-HSA-211000                                                              | 4/101 | 0.184869 | 0.480<br>928 | 0 | 0 | 1.832227 | 3.0929<br>96 |
| Regulation of TP53 Expression and Degradation Homo sapiens R-HSA-6806003                                     | 2/36  | 0.188709 | 0.488<br>811 | 0 | 0 | 2.61016  | 4.3525<br>72 |
| Cyclin E associated events during G1/S transition Homo sapiens R-HSA-69202                                   | 3/68  | 0.190215 | 0.488<br>811 | 0 | 0 | 2.049378 | 3.4011<br>53 |
| Cyclin A:Cdk2-associated events at S phase entry Homo sapiens R-HSA-69656                                    | 3/69  | 0.195845 | 0.488<br>811 | 0 | 0 | 2.018223 | 3.2905<br>77 |
| NCAM1 interactions Homo sapiens R-HSA-419037                                                                 | 2/37  | 0.196756 | 0.488<br>811 | 0 | 0 | 2.535455 | 4.1221<br>14 |
| Translesion synthesis by Y family DNA polymerases bypasses lesions on DNA template Homo sapiens R-HSA-110313 | 2/37  | 0.196756 | 0.488<br>811 | 0 | 0 | 2.535455 | 4.1221<br>14 |
| Abacavir transport and metabolism Homo sapiens R-HSA-2161522                                                 | 1/10  | 0.200308 | 0.488<br>811 | 0 | 0 | 4.925422 | 7.9195<br>75 |
| eNOS activation Homo sapiens R-HSA-203615                                                                    | 1/10  | 0.200308 | 0.488<br>811 | 0 | 0 | 4.925422 | 7.9195<br>75 |
| Tetrahydrobiopterin (BH4) synthesis. recycling. salvage and regulation Homo sapiens R-HSA-1474151            | 1/10  | 0.200308 | 0.488<br>811 | 0 | 0 | 4.925422 | 7.9195<br>75 |

|                                                                                      |       |          |              |   |   |          |              |
|--------------------------------------------------------------------------------------|-------|----------|--------------|---|---|----------|--------------|
| ATF6-alpha activates chaperone genes Homo sapiens R-HSA-381183                       | 1/10  | 0.200308 | 0.488<br>811 | 0 | 0 | 4.925422 | 7.9195<br>75 |
| Regulation of signaling by NODAL Homo sapiens R-HSA-1433617                          | 1/10  | 0.200308 | 0.488<br>811 | 0 | 0 | 4.925422 | 7.9195<br>75 |
| Glycoprotein hormones Homo sapiens R-HSA-209822                                      | 1/10  | 0.200308 | 0.488<br>811 | 0 | 0 | 4.925422 | 7.9195<br>75 |
| SLBP independent Processing of Histone Pre-mRNAs Homo sapiens R-HSA-111367           | 1/10  | 0.200308 | 0.488<br>811 | 0 | 0 | 4.925422 | 7.9195<br>75 |
| Regulation of gene expression by Hypoxia-inducible Factor Homo sapiens R-HSA-1234158 | 1/10  | 0.200308 | 0.488<br>811 | 0 | 0 | 4.925422 | 7.9195<br>75 |
| Signaling by FGFR3 fusions in cancer Homo sapiens R-HSA-8853334                      | 1/10  | 0.200308 | 0.488<br>811 | 0 | 0 | 4.925422 | 7.9195<br>75 |
| Activation of the AP-1 family of transcription factors Homo sapiens R-HSA-450341     | 1/10  | 0.200308 | 0.488<br>811 | 0 | 0 | 4.925422 | 7.9195<br>75 |
| IRAK1 recruits IKK complex Homo sapiens R-HSA-937039                                 | 1/10  | 0.200308 | 0.488<br>811 | 0 | 0 | 4.925422 | 7.9195<br>75 |
| IRAK1 recruits IKK complex upon TLR7/8 or 9 stimulation Homo sapiens R-HSA-975144    | 1/10  | 0.200308 | 0.488<br>811 | 0 | 0 | 4.925422 | 7.9195<br>75 |
| TRIF-mediated programmed cell death Homo sapiens R-HSA-2562578                       | 1/10  | 0.200308 | 0.488<br>811 | 0 | 0 | 4.925422 | 7.9195<br>75 |
| Switching of origins to a post-replicative state Homo sapiens R-HSA-69052            | 3/70  | 0.201515 | 0.488<br>811 | 0 | 0 | 1.987999 | 3.1845<br>54 |
| Orc1 removal from chromatin Homo sapiens R-HSA-68949                                 | 3/70  | 0.201515 | 0.488<br>811 | 0 | 0 | 1.987999 | 3.1845<br>54 |
| DNA Replication Homo sapiens R-HSA-69306                                             | 4/105 | 0.20288  | 0.490<br>464 | 0 | 0 | 1.759302 | 2.8063<br>34 |
| DNA Damage Recognition in GG-NER Homo sapiens R-HSA-5696394                          | 2/38  | 0.204845 | 0.493<br>553 | 0 | 0 | 2.464899 | 3.9081       |
| Transcriptional regulation by small RNAs Homo sapiens R-HSA-5578749                  | 3/72  | 0.212969 | 0.495<br>461 | 0 | 0 | 1.930177 | 2.9852<br>28 |
| ISG15 antiviral mechanism Homo sapiens R-HSA-1169408                                 | 3/72  | 0.212969 | 0.495<br>461 | 0 | 0 | 1.930177 | 2.9852<br>28 |
| Antiviral mechanism by IFN-stimulated genes Homo sapiens R-HSA-1169410               | 3/72  | 0.212969 | 0.495<br>461 | 0 | 0 | 1.930177 | 2.9852<br>28 |
| Removal of licensing factors from origins Homo sapiens R-HSA-69300                   | 3/72  | 0.212969 | 0.495<br>461 | 0 | 0 | 1.930177 | 2.9852<br>28 |

|                                                                                                         |        |          |              |   |   |          |              |
|---------------------------------------------------------------------------------------------------------|--------|----------|--------------|---|---|----------|--------------|
| TRAF6 Mediated Induction of proinflammatory cytokines<br>Homo sapiens R-HSA-168180                      | 3/72   | 0.212969 | 0.495<br>461 | 0 | 0 | 1.930177 | 2.9852<br>28 |
| Activation of NMDA receptor upon glutamate binding and postsynaptic events<br>Homo sapiens R-HSA-442755 | 2/39   | 0.212969 | 0.495<br>461 | 0 | 0 | 2.398157 | 3.7090<br>07 |
| Dual Incision in GG-NER<br>Homo sapiens R-HSA-5696400                                                   | 2/39   | 0.212969 | 0.495<br>461 | 0 | 0 | 2.398157 | 3.7090<br>07 |
| Cytokine Signaling in Immune system<br>Homo sapiens R-HSA-1280215                                       | 17/620 | 0.213667 | 0.495<br>461 | 0 | 0 | 1.25738  | 1.9405<br>58 |
| Import of palmitoyl-CoA into the mitochondrial matrix<br>Homo sapiens R-HSA-200425                      | 1/11   | 0.21799  | 0.495<br>461 | 0 | 0 | 4.432653 | 6.7522<br>82 |
| SLBP Dependent Processing of Replication-Dependent Histone Pre-mRNAs<br>Homo sapiens R-HSA-77588        | 1/11   | 0.21799  | 0.495<br>461 | 0 | 0 | 4.432653 | 6.7522<br>82 |
| Highly calcium permeable postsynaptic nicotinic acetylcholine receptors<br>Homo sapiens R-HSA-629594    | 1/11   | 0.21799  | 0.495<br>461 | 0 | 0 | 4.432653 | 6.7522<br>82 |
| Response to metal ions<br>Homo sapiens R-HSA-5660526                                                    | 1/11   | 0.21799  | 0.495<br>461 | 0 | 0 | 4.432653 | 6.7522<br>82 |
| Metallothioneins bind metals<br>Homo sapiens R-HSA-5661231                                              | 1/11   | 0.21799  | 0.495<br>461 | 0 | 0 | 4.432653 | 6.7522<br>82 |
| Signaling by FGFR4 in disease<br>Homo sapiens R-HSA-5655291                                             | 1/11   | 0.21799  | 0.495<br>461 | 0 | 0 | 4.432653 | 6.7522<br>82 |
| MyD88 deficiency (TLR2/4)<br>Homo sapiens R-HSA-5602498                                                 | 1/11   | 0.21799  | 0.495<br>461 | 0 | 0 | 4.432653 | 6.7522<br>82 |
| IRAK4 deficiency (TLR2/4)<br>Homo sapiens R-HSA-5603041                                                 | 1/11   | 0.21799  | 0.495<br>461 | 0 | 0 | 4.432653 | 6.7522<br>82 |
| DNA Double-Strand Break Repair<br>Homo sapiens R-HSA-5693532                                            | 5/145  | 0.218051 | 0.495<br>461 | 0 | 0 | 1.586957 | 2.4169<br>75 |
| Positive epigenetic regulation of rRNA expression<br>Homo sapiens R-HSA-5250913                         | 3/73   | 0.218748 | 0.495<br>461 | 0 | 0 | 1.902506 | 2.8914<br>95 |
| NoRC negatively regulates rRNA expression<br>Homo sapiens R-HSA-427413                                  | 3/73   | 0.218748 | 0.495<br>461 | 0 | 0 | 1.902506 | 2.8914<br>95 |
| TNF signaling<br>Homo sapiens R-HSA-75893                                                               | 2/41   | 0.229302 | 0.507<br>517 | 0 | 0 | 2.274942 | 3.3503<br>37 |
| Regulation of DNA replication<br>Homo sapiens R-HSA-69304                                               | 3/75   | 0.230399 | 0.507<br>517 | 0 | 0 | 1.849468 | 2.7149<br>12 |

|                                                                                           |       |          |              |   |   |          |              |
|-------------------------------------------------------------------------------------------|-------|----------|--------------|---|---|----------|--------------|
| Erythrocytes take up carbon dioxide and release oxygen<br>Homo sapiens R-HSA-1237044      | 1/12  | 0.235282 | 0.507<br>517 | 0 | 0 | 4.029478 | 5.8305<br>33 |
| O2/CO2 exchange in erythrocytes<br>Homo sapiens R-HSA-1480926                             | 1/12  | 0.235282 | 0.507<br>517 | 0 | 0 | 4.029478 | 5.8305<br>33 |
| Reversible hydration of carbon dioxide<br>Homo sapiens R-HSA-1475029                      | 1/12  | 0.235282 | 0.507<br>517 | 0 | 0 | 4.029478 | 5.8305<br>33 |
| Defective EXT2 causes exostoses 2<br>Homo sapiens R-HSA-3656237                           | 1/12  | 0.235282 | 0.507<br>517 | 0 | 0 | 4.029478 | 5.8305<br>33 |
| Defective EXT1 causes exostoses 1. TRPS2 and CHDS<br>Homo sapiens R-HSA-3656253           | 1/12  | 0.235282 | 0.507<br>517 | 0 | 0 | 4.029478 | 5.8305<br>33 |
| ATF6-alpha activates chaperones<br>Homo sapiens R-HSA-381033                              | 1/12  | 0.235282 | 0.507<br>517 | 0 | 0 | 4.029478 | 5.8305<br>33 |
| TP53 Regulates Transcription of Death Receptors and Ligands<br>Homo sapiens R-HSA-6803211 | 1/12  | 0.235282 | 0.507<br>517 | 0 | 0 | 4.029478 | 5.8305<br>33 |
| The NLRP3 inflammasome<br>Homo sapiens R-HSA-844456                                       | 1/12  | 0.235282 | 0.507<br>517 | 0 | 0 | 4.029478 | 5.8305<br>33 |
| Peptide hormone biosynthesis<br>Homo sapiens R-HSA-209952                                 | 1/12  | 0.235282 | 0.507<br>517 | 0 | 0 | 4.029478 | 5.8305<br>33 |
| Presynaptic nicotinic acetylcholine receptors<br>Homo sapiens R-HSA-622323                | 1/12  | 0.235282 | 0.507<br>517 | 0 | 0 | 4.029478 | 5.8305<br>33 |
| G1/S Transition<br>Homo sapiens R-HSA-69206                                               | 4/112 | 0.23554  | 0.507<br>517 | 0 | 0 | 1.644681 | 2.378        |
| Negative epigenetic regulation of rRNA expression<br>Homo sapiens R-HSA-5250941           | 3/76  | 0.236268 | 0.507<br>517 | 0 | 0 | 1.82404  | 2.6317<br>07 |
| RNA Polymerase I Promoter Clearance<br>Homo sapiens R-HSA-73854                           | 3/76  | 0.236268 | 0.507<br>517 | 0 | 0 | 1.82404  | 2.6317<br>07 |
| Netrin-1 signaling<br>Homo sapiens R-HSA-373752                                           | 2/42  | 0.237501 | 0.507<br>517 | 0 | 0 | 2.217955 | 3.1884<br>94 |
| EPHB-mediated forward signaling<br>Homo sapiens R-HSA-3928662                             | 2/42  | 0.237501 | 0.507<br>517 | 0 | 0 | 2.217955 | 3.1884<br>94 |
| Retinoid metabolism and transport<br>Homo sapiens R-HSA-975634                            | 2/42  | 0.237501 | 0.507<br>517 | 0 | 0 | 2.217955 | 3.1884<br>94 |
| Transcriptional regulation of pluripotent stem cells<br>Homo sapiens R-HSA-452723         | 2/42  | 0.237501 | 0.507<br>517 | 0 | 0 | 2.217955 | 3.1884<br>94 |

|                                                                                                                        |        |          |              |   |   |          |              |
|------------------------------------------------------------------------------------------------------------------------|--------|----------|--------------|---|---|----------|--------------|
| Formation of Incision Complex in GG-NER Homo sapiens R-HSA-5696395                                                     | 2/43   | 0.245714 | 0.523<br>51  | 0 | 0 | 2.163747 | 3.0370<br>04 |
| Innate Immune System Homo sapiens R-HSA-168249                                                                         | 21/807 | 0.250714 | 0.524<br>853 | 0 | 0 | 1.191311 | 1.6481<br>08 |
| Facilitative Na+-independent glucose transporters Homo sapiens R-HSA-428790                                            | 1/13   | 0.252193 | 0.524<br>853 | 0 | 0 | 3.6935   | 5.0880<br>26 |
| Cytosolic iron-sulfur cluster assembly Homo sapiens R-HSA-2564830                                                      | 1/13   | 0.252193 | 0.524<br>853 | 0 | 0 | 3.6935   | 5.0880<br>26 |
| Synthesis, secretion, and inactivation of Glucose-dependent Insulinotropic Polypeptide (GIP) Homo sapiens R-HSA-400511 | 1/13   | 0.252193 | 0.524<br>853 | 0 | 0 | 3.6935   | 5.0880<br>26 |
| TP53 Regulates Transcription of Genes Involved in G1 Cell Cycle Arrest Homo sapiens R-HSA-6804116                      | 1/13   | 0.252193 | 0.524<br>853 | 0 | 0 | 3.6935   | 5.0880<br>26 |
| Signaling by Activin Homo sapiens R-HSA-1502540                                                                        | 1/13   | 0.252193 | 0.524<br>853 | 0 | 0 | 3.6935   | 5.0880<br>26 |
| AKT phosphorylates targets in the cytosol Homo sapiens R-HSA-198323                                                    | 1/13   | 0.252193 | 0.524<br>853 | 0 | 0 | 3.6935   | 5.0880<br>26 |
| ERBB2 Activates PTK6 Signaling Homo sapiens R-HSA-8847993                                                              | 1/13   | 0.252193 | 0.524<br>853 | 0 | 0 | 3.6935   | 5.0880<br>26 |
| Intra-Golgi traffic Homo sapiens R-HSA-6811438                                                                         | 2/44   | 0.253938 | 0.526<br>958 | 0 | 0 | 2.112121 | 2.8950<br>11 |
| RNA Polymerase I, RNA Polymerase III, and Mitochondrial Transcription Homo sapiens R-HSA-504046                        | 4/116  | 0.254738 | 0.527<br>094 | 0 | 0 | 1.585616 | 2.1683<br>63 |
| Signaling by the B Cell Receptor (BCR) Homo sapiens R-HSA-983705                                                       | 7/233  | 0.257735 | 0.531<br>763 | 0 | 0 | 1.376503 | 1.8662<br>95 |
| Diseases of metabolism Homo sapiens R-HSA-5668914                                                                      | 2/45   | 0.262167 | 0.533<br>006 | 0 | 0 | 2.062896 | 2.7617<br>49 |
| Interferon Signaling Homo sapiens R-HSA-913531                                                                         | 6/196  | 0.266765 | 0.533<br>006 | 0 | 0 | 1.402801 | 1.8536<br>45 |
| SEMA3A-Plexin repulsion signaling by inhibiting Integrin adhesion Homo sapiens R-HSA-399955                            | 1/14   | 0.26873  | 0.533<br>006 | 0 | 0 | 3.40921  | 4.4798<br>68 |
| Repression of WNT target genes Homo sapiens R-HSA-4641265                                                              | 1/14   | 0.26873  | 0.533<br>006 | 0 | 0 | 3.40921  | 4.4798<br>68 |
| Early Phase of HIV Life Cycle Homo sapiens R-HSA-162594                                                                | 1/14   | 0.26873  | 0.533<br>006 | 0 | 0 | 3.40921  | 4.4798<br>68 |

|                                                                                                                                                                 |       |          |          |   |   |          |          |
|-----------------------------------------------------------------------------------------------------------------------------------------------------------------|-------|----------|----------|---|---|----------|----------|
| Regulation of TP53 Activity through Association with Co-factors Homo sapiens R-HSA-6804759                                                                      | 1/14  | 0.26873  | 0.533006 | 0 | 0 | 3.40921  | 4.479868 |
| TP53 regulates transcription of several additional cell death genes whose specific roles in p53-dependent apoptosis remain uncertain Homo sapiens R-HSA-6803205 | 1/14  | 0.26873  | 0.533006 | 0 | 0 | 3.40921  | 4.479868 |
| Synthesis of bile acids and bile salts via 24-hydroxycholesterol Homo sapiens R-HSA-193775                                                                      | 1/14  | 0.26873  | 0.533006 | 0 | 0 | 3.40921  | 4.479868 |
| Glutathione synthesis and recycling Homo sapiens R-HSA-174403                                                                                                   | 1/14  | 0.26873  | 0.533006 | 0 | 0 | 3.40921  | 4.479868 |
| Regulation of pyruvate dehydrogenase (PDH) complex Homo sapiens R-HSA-204174                                                                                    | 1/14  | 0.26873  | 0.533006 | 0 | 0 | 3.40921  | 4.479868 |
| Activation of Nicotinic Acetylcholine Receptors Homo sapiens R-HSA-629602                                                                                       | 1/14  | 0.26873  | 0.533006 | 0 | 0 | 3.40921  | 4.479868 |
| Postsynaptic nicotinic acetylcholine receptors Homo sapiens R-HSA-622327                                                                                        | 1/14  | 0.26873  | 0.533006 | 0 | 0 | 3.40921  | 4.479868 |
| Acetylcholine Binding And Downstream Events Homo sapiens R-HSA-181431                                                                                           | 1/14  | 0.26873  | 0.533006 | 0 | 0 | 3.40921  | 4.479868 |
| Regulation of IFNG signaling Homo sapiens R-HSA-877312                                                                                                          | 1/14  | 0.26873  | 0.533006 | 0 | 0 | 3.40921  | 4.479868 |
| DNA Damage Bypass Homo sapiens R-HSA-73893                                                                                                                      | 2/46  | 0.270398 | 0.533501 | 0 | 0 | 2.015909 | 2.636527 |
| Degradation of beta-catenin by the destruction complex Homo sapiens R-HSA-195253                                                                                | 3/82  | 0.271952 | 0.533501 | 0 | 0 | 1.684986 | 2.194072 |
| DNA Replication Pre-Initiation Homo sapiens R-HSA-69002                                                                                                         | 3/82  | 0.271952 | 0.533501 | 0 | 0 | 1.684986 | 2.194072 |
| M/G1 Transition Homo sapiens R-HSA-68874                                                                                                                        | 3/82  | 0.271952 | 0.533501 | 0 | 0 | 1.684986 | 2.194072 |
| TCF dependent signaling in response to WNT Homo sapiens R-HSA-201681                                                                                            | 6/199 | 0.27805  | 0.537746 | 0 | 0 | 1.380781 | 1.767335 |
| PI-3K cascade:FGFR1 Homo sapiens R-HSA-5654689                                                                                                                  | 4/122 | 0.284084 | 0.537746 | 0 | 0 | 1.504528 | 1.893426 |
| PI-3K cascade:FGFR3 Homo sapiens R-HSA-5654710                                                                                                                  | 4/122 | 0.284084 | 0.537746 | 0 | 0 | 1.504528 | 1.893426 |
| PI3K events in ERBB4 signaling Homo sapiens R-HSA-1250342                                                                                                       | 4/122 | 0.284084 | 0.537746 | 0 | 0 | 1.504528 | 1.893426 |

|                                                                                               |        |          |              |   |   |          |              |
|-----------------------------------------------------------------------------------------------|--------|----------|--------------|---|---|----------|--------------|
| PIP3 activates AKT signaling<br>Homo sapiens R-HSA-1257604                                    | 4/122  | 0.284084 | 0.537<br>746 | 0 | 0 | 1.504528 | 1.8934<br>26 |
| PI-3K cascade:FGFR4 Homo sapiens R-HSA-5654720                                                | 4/122  | 0.284084 | 0.537<br>746 | 0 | 0 | 1.504528 | 1.8934<br>26 |
| PI-3K cascade:FGFR2 Homo sapiens R-HSA-5654695                                                | 4/122  | 0.284084 | 0.537<br>746 | 0 | 0 | 1.504528 | 1.8934<br>26 |
| CREB phosphorylation through the activation of CaMKII Homo sapiens R-HSA-442729               | 1/15   | 0.284902 | 0.537<br>746 | 0 | 0 | 3.165533 | 3.9746<br>72 |
| Eicosanoid ligand-binding receptors Homo sapiens R-HSA-391903                                 | 1/15   | 0.284902 | 0.537<br>746 | 0 | 0 | 3.165533 | 3.9746<br>72 |
| Recycling of bile acids and salts Homo sapiens R-HSA-159418                                   | 1/15   | 0.284902 | 0.537<br>746 | 0 | 0 | 3.165533 | 3.9746<br>72 |
| Glycogen breakdown (glycogenolysis) Homo sapiens R-HSA-70221                                  | 1/15   | 0.284902 | 0.537<br>746 | 0 | 0 | 3.165533 | 3.9746<br>72 |
| ERBB2 Regulates Cell Motility Homo sapiens R-HSA-6785631                                      | 1/15   | 0.284902 | 0.537<br>746 | 0 | 0 | 3.165533 | 3.9746<br>72 |
| Signaling by EGFRvIII in Cancer Homo sapiens R-HSA-5637812                                    | 1/15   | 0.284902 | 0.537<br>746 | 0 | 0 | 3.165533 | 3.9746<br>72 |
| Constitutive Signaling by EGFRvIII Homo sapiens R-HSA-5637810                                 | 1/15   | 0.284902 | 0.537<br>746 | 0 | 0 | 3.165533 | 3.9746<br>72 |
| Metabolism of carbohydrates Homo sapiens R-HSA-71387                                          | 8/282  | 0.286513 | 0.537<br>746 | 0 | 0 | 1.297319 | 1.6216<br>14 |
| Hexose transport Homo sapiens R-HSA-189200                                                    | 2/48   | 0.286848 | 0.537<br>746 | 0 | 0 | 1.928063 | 2.4077<br>73 |
| Death Receptor Signalling Homo sapiens R-HSA-73887                                            | 2/48   | 0.286848 | 0.537<br>746 | 0 | 0 | 1.928063 | 2.4077<br>73 |
| Meiosis Homo sapiens R-HSA-1500620                                                            | 3/85   | 0.290014 | 0.540<br>857 | 0 | 0 | 1.62309  | 2.0091<br>03 |
| Hedgehog 'on' state Homo sapiens R-HSA-5632684                                                | 3/85   | 0.290014 | 0.540<br>857 | 0 | 0 | 1.62309  | 2.0091<br>03 |
| Signalling by NGF Homo sapiens R-HSA-166520                                                   | 12/450 | 0.294229 | 0.545<br>71  | 0 | 0 | 1.218222 | 1.4903<br>71 |
| Mitochondrial biogenesis Homo sapiens R-HSA-1592230                                           | 2/49   | 0.295059 | 0.545<br>71  | 0 | 0 | 1.886944 | 2.3031<br>66 |
| Regulation of activated PAK-2p34 by proteasome mediated degradation Homo sapiens R-HSA-211733 | 2/49   | 0.295059 | 0.545<br>71  | 0 | 0 | 1.886944 | 2.3031<br>66 |
| Chromosome Maintenance Homo sapiens R-HSA-73886                                               | 3/86   | 0.296055 | 0.545<br>71  | 0 | 0 | 1.603453 | 1.9517<br>36 |
| GAB1 signalosome Homo sapiens R-HSA-180292                                                    | 4/125  | 0.298945 | 0.545<br>71  | 0 | 0 | 1.466999 | 1.7713<br>95 |

|                                                                                |       |          |              |   |   |          |              |
|--------------------------------------------------------------------------------|-------|----------|--------------|---|---|----------|--------------|
| PI3K/AKT activation Homo sapiens R-HSA-198203                                  | 4/125 | 0.298945 | 0.545<br>71  | 0 | 0 | 1.466999 | 1.7713<br>95 |
| Regulation of KIT signaling Homo sapiens R-HSA-1433559                         | 1/16  | 0.300718 | 0.545<br>71  | 0 | 0 | 2.954346 | 3.5498<br>93 |
| Sema3A PAK dependent Axon repulsion Homo sapiens R-HSA-399954                  | 1/16  | 0.300718 | 0.545<br>71  | 0 | 0 | 2.954346 | 3.5498<br>93 |
| PI3K events in ERBB2 signaling Homo sapiens R-HSA-1963642                      | 1/16  | 0.300718 | 0.545<br>71  | 0 | 0 | 2.954346 | 3.5498<br>93 |
| GRB2 events in ERBB2 signaling Homo sapiens R-HSA-1963640                      | 1/16  | 0.300718 | 0.545<br>71  | 0 | 0 | 2.954346 | 3.5498<br>93 |
| CDK-mediated phosphorylation and removal of Cdc6 Homo sapiens R-HSA-69017      | 2/50  | 0.303257 | 0.545<br>71  | 0 | 0 | 1.847538 | 2.2044<br>38 |
| Ubiquitin-dependent degradation of Cyclin D1 Homo sapiens R-HSA-69229          | 2/50  | 0.303257 | 0.545<br>71  | 0 | 0 | 1.847538 | 2.2044<br>38 |
| Ubiquitin-dependent degradation of Cyclin D Homo sapiens R-HSA-75815           | 2/50  | 0.303257 | 0.545<br>71  | 0 | 0 | 1.847538 | 2.2044<br>38 |
| Regulation of Apoptosis Homo sapiens R-HSA-169911                              | 2/50  | 0.303257 | 0.545<br>71  | 0 | 0 | 1.847538 | 2.2044<br>38 |
| Diseases of glycosylation Homo sapiens R-HSA-3781865                           | 3/88  | 0.308159 | 0.548<br>358 | 0 | 0 | 1.565563 | 1.8428<br>86 |
| Neurotransmitter Release Cycle Homo sapiens R-HSA-112310                       | 2/51  | 0.311437 | 0.548<br>358 | 0 | 0 | 1.80974  | 2.1111<br>68 |
| Metabolism of fat-soluble vitamins Homo sapiens R-HSA-6806667                  | 2/51  | 0.311437 | 0.548<br>358 | 0 | 0 | 1.80974  | 2.1111<br>68 |
| Nuclear Receptor transcription pathway Homo sapiens R-HSA-383280               | 2/51  | 0.311437 | 0.548<br>358 | 0 | 0 | 1.80974  | 2.1111<br>68 |
| Vpu mediated degradation of CD4 Homo sapiens R-HSA-180534                      | 2/51  | 0.311437 | 0.548<br>358 | 0 | 0 | 1.80974  | 2.1111<br>68 |
| Autodegradation of the E3 ubiquitin ligase COP1 Homo sapiens R-HSA-349425      | 2/51  | 0.311437 | 0.548<br>358 | 0 | 0 | 1.80974  | 2.1111<br>68 |
| Regulation of TP53 Activity through Phosphorylation Homo sapiens R-HSA-6804756 | 3/89  | 0.314218 | 0.548<br>358 | 0 | 0 | 1.54728  | 1.7912<br>36 |
| Acetylcholine Neurotransmitter Release Cycle Homo sapiens R-HSA-264642         | 1/17  | 0.316184 | 0.548<br>358 | 0 | 0 | 2.769558 | 3.1889<br>53 |

|                                                                                                              |       |          |              |   |   |          |              |
|--------------------------------------------------------------------------------------------------------------|-------|----------|--------------|---|---|----------|--------------|
| Ras activation upon Ca <sup>2+</sup> influx through NMDA receptor<br>Homo sapiens R-HSA-442982               | 1/17  | 0.316184 | 0.548<br>358 | 0 | 0 | 2.769558 | 3.1889<br>53 |
| TNF receptor superfamily (TNFSF) members mediating non-canonical NF-κB pathway<br>Homo sapiens R-HSA-5676594 | 1/17  | 0.316184 | 0.548<br>358 | 0 | 0 | 2.769558 | 3.1889<br>53 |
| Trafficking of GluR2-containing AMPA receptors<br>Homo sapiens R-HSA-416993                                  | 1/17  | 0.316184 | 0.548<br>358 | 0 | 0 | 2.769558 | 3.1889<br>53 |
| Tristetraprolin (TTP, ZFP36) binds and destabilizes mRNA<br>Homo sapiens R-HSA-450513                        | 1/17  | 0.316184 | 0.548<br>358 | 0 | 0 | 2.769558 | 3.1889<br>53 |
| Inflammasomes<br>Homo sapiens R-HSA-622312                                                                   | 1/17  | 0.316184 | 0.548<br>358 | 0 | 0 | 2.769558 | 3.1889<br>53 |
| Formation of Senescence-Associated Heterochromatin Foci (SAHF)<br>Homo sapiens R-HSA-2559584                 | 1/17  | 0.316184 | 0.548<br>358 | 0 | 0 | 2.769558 | 3.1889<br>53 |
| Ligand-dependent caspase activation<br>Homo sapiens R-HSA-140534                                             | 1/17  | 0.316184 | 0.548<br>358 | 0 | 0 | 2.769558 | 3.1889<br>53 |
| Nonhomologous End-Joining (NHEJ)<br>Homo sapiens R-HSA-5693571                                               | 2/52  | 0.319597 | 0.548<br>973 | 0 | 0 | 1.773455 | 2.0229<br>7  |
| p53-Independent DNA Damage Response<br>Homo sapiens R-HSA-69610                                              | 2/52  | 0.319597 | 0.548<br>973 | 0 | 0 | 1.773455 | 2.0229<br>7  |
| p53-Independent G1/S DNA damage checkpoint<br>Homo sapiens R-HSA-69613                                       | 2/52  | 0.319597 | 0.548<br>973 | 0 | 0 | 1.773455 | 2.0229<br>7  |
| Ubiquitin Mediated Degradation of Phosphorylated Cdc25A<br>Homo sapiens R-HSA-69601                          | 2/52  | 0.319597 | 0.548<br>973 | 0 | 0 | 1.773455 | 2.0229<br>7  |
| Transmission across Chemical Synapses<br>Homo sapiens R-HSA-112315                                           | 6/211 | 0.324154 | 0.554<br>499 | 0 | 0 | 1.29915  | 1.4635<br>4  |
| PCP/CE pathway<br>Homo sapiens R-HSA-4086400                                                                 | 3/91  | 0.326342 | 0.554<br>499 | 0 | 0 | 1.511959 | 1.6931<br>04 |
| Formation of TC-NER Pre-Incision Complex<br>Homo sapiens R-HSA-6781823                                       | 2/53  | 0.327733 | 0.554<br>499 | 0 | 0 | 1.738592 | 1.9394<br>95 |
| Vif-mediated degradation of APOBEC3G<br>Homo sapiens R-HSA-180585                                            | 2/53  | 0.327733 | 0.554<br>499 | 0 | 0 | 1.738592 | 1.9394<br>95 |
| Signaling by Wnt<br>Homo sapiens R-HSA-195721                                                                | 8/295 | 0.32874  | 0.554<br>499 | 0 | 0 | 1.237721 | 1.3769<br>48 |
| Serotonin Neurotransmitter Release Cycle<br>Homo sapiens R-HSA-181429                                        | 1/18  | 0.331309 | 0.554<br>499 | 0 | 0 | 2.606509 | 2.8794<br>18 |

|                                                                                                         |       |          |              |   |   |          |              |
|---------------------------------------------------------------------------------------------------------|-------|----------|--------------|---|---|----------|--------------|
| Norepinephrine Neurotransmitter Release Cycle Homo sapiens R-HSA-181430                                 | 1/18  | 0.331309 | 0.554<br>499 | 0 | 0 | 2.606509 | 2.8794<br>18 |
| Defective GALNT12 causes colorectal cancer 1 (CRCS1) Homo sapiens R-HSA-5083636                         | 1/18  | 0.331309 | 0.554<br>499 | 0 | 0 | 2.606509 | 2.8794<br>18 |
| Defective GALNT3 causes familial hyperphosphatemic tumoral calcinosis (HFTC) Homo sapiens R-HSA-5083625 | 1/18  | 0.331309 | 0.554<br>499 | 0 | 0 | 2.606509 | 2.8794<br>18 |
| Activation of SMO Homo sapiens R-HSA-5635838                                                            | 1/18  | 0.331309 | 0.554<br>499 | 0 | 0 | 2.606509 | 2.8794<br>18 |
| SHC1 events in ERBB2 signaling Homo sapiens R-HSA-1250196                                               | 1/18  | 0.331309 | 0.554<br>499 | 0 | 0 | 2.606509 | 2.8794<br>18 |
| Heparan sulfate/heparin (HS-GAG) metabolism Homo sapiens R-HSA-1638091                                  | 2/54  | 0.335843 | 0.554<br>792 | 0 | 0 | 1.70507  | 1.8604<br>2  |
| Golgi Associated Vesicle Biogenesis Homo sapiens R-HSA-432722                                           | 2/54  | 0.335843 | 0.554<br>792 | 0 | 0 | 1.70507  | 1.8604<br>2  |
| SCF-beta-TrCP mediated degradation of Emi1 Homo sapiens R-HSA-174113                                    | 2/54  | 0.335843 | 0.554<br>792 | 0 | 0 | 1.70507  | 1.8604<br>2  |
| Stabilization of p53 Homo sapiens R-HSA-69541                                                           | 2/54  | 0.335843 | 0.554<br>792 | 0 | 0 | 1.70507  | 1.8604<br>2  |
| Degradation of AXIN Homo sapiens R-HSA-4641257                                                          | 2/54  | 0.335843 | 0.554<br>792 | 0 | 0 | 1.70507  | 1.8604<br>2  |
| G2/M Transition Homo sapiens R-HSA-69275                                                                | 5/173 | 0.33612  | 0.554<br>792 | 0 | 0 | 1.320557 | 1.4397<br>85 |
| Mitotic G2-G2/M phases Homo sapiens R-HSA-453274                                                        | 5/175 | 0.344861 | 0.558<br>428 | 0 | 0 | 1.304886 | 1.3892       |
| GABA synthesis. release. reuptake and degradation Homo sapiens R-HSA-888590                             | 1/19  | 0.346101 | 0.558<br>428 | 0 | 0 | 2.461577 | 2.6117<br>96 |
| Other semaphorin interactions Homo sapiens R-HSA-416700                                                 | 1/19  | 0.346101 | 0.558<br>428 | 0 | 0 | 2.461577 | 2.6117<br>96 |
| Ephrin signaling Homo sapiens R-HSA-3928664                                                             | 1/19  | 0.346101 | 0.558<br>428 | 0 | 0 | 2.461577 | 2.6117<br>96 |
| Defective B3GALT6 causes EDSP2 and SEMDJL1 Homo sapiens R-HSA-4420332                                   | 1/19  | 0.346101 | 0.558<br>428 | 0 | 0 | 2.461577 | 2.6117<br>96 |
| Defective B4GALT7 causes EDS. progeroid type Homo sapiens R-HSA-3560783                                 | 1/19  | 0.346101 | 0.558<br>428 | 0 | 0 | 2.461577 | 2.6117<br>96 |
| Defective B3GAT3 causes JDSSDHD Homo sapiens R-HSA-3560801                                              | 1/19  | 0.346101 | 0.558<br>428 | 0 | 0 | 2.461577 | 2.6117<br>96 |

|                                                                                                   |       |          |              |   |   |          |              |
|---------------------------------------------------------------------------------------------------|-------|----------|--------------|---|---|----------|--------------|
| TP53 Regulates Transcription of Genes Involved in Cytochrome C Release Homo sapiens R-HSA-6803204 | 1/19  | 0.346101 | 0.558<br>428 | 0 | 0 | 2.461577 | 2.6117<br>96 |
| Signaling by NODAL Homo sapiens R-HSA-1181150                                                     | 1/19  | 0.346101 | 0.558<br>428 | 0 | 0 | 2.461577 | 2.6117<br>96 |
| Phase 4 - resting membrane potential Homo sapiens R-HSA-5576886                                   | 1/19  | 0.346101 | 0.558<br>428 | 0 | 0 | 2.461577 | 2.6117<br>96 |
| TNFR2 non-canonical NF-kB pathway Homo sapiens R-HSA-5668541                                      | 3/95  | 0.350574 | 0.564<br>377 | 0 | 0 | 1.445925 | 1.5155<br>95 |
| Degradation of DVL Homo sapiens R-HSA-4641258                                                     | 2/56  | 0.351973 | 0.565<br>361 | 0 | 0 | 1.641751 | 1.7143<br>19 |
| Mitotic G1-G1/S phases Homo sapiens R-HSA-453279                                                  | 4/136 | 0.354013 | 0.567<br>369 | 0 | 0 | 1.343988 | 1.3956<br>26 |
| Defective C1GALT1C1 causes Tn polyagglutination syndrome (TNPS) Homo sapiens R-HSA-5083632        | 1/20  | 0.360566 | 0.574<br>027 | 0 | 0 | 2.331901 | 2.3787<br>29 |
| eNOS activation and regulation Homo sapiens R-HSA-203765                                          | 1/20  | 0.360566 | 0.574<br>027 | 0 | 0 | 2.331901 | 2.3787<br>29 |
| Metabolism of nitric oxide Homo sapiens R-HSA-202131                                              | 1/20  | 0.360566 | 0.574<br>027 | 0 | 0 | 2.331901 | 2.3787<br>29 |
| Synthesis of DNA Homo sapiens R-HSA-69239                                                         | 3/97  | 0.362658 | 0.576<br>081 | 0 | 0 | 1.415015 | 1.4352<br>42 |
| NIK-->noncanonical NF-kB signaling Homo sapiens R-HSA-5676590                                     | 2/58  | 0.367965 | 0.581<br>935 | 0 | 0 | 1.582955 | 1.5825<br>88 |
| CDT1 association with the CDC6:ORC:origin complex Homo sapiens R-HSA-68827                        | 2/58  | 0.367965 | 0.581<br>935 | 0 | 0 | 1.582955 | 1.5825<br>88 |
| CLEC7A (Dectin-1) signaling Homo sapiens R-HSA-5607764                                            | 3/99  | 0.374707 | 0.585<br>463 | 0 | 0 | 1.385393 | 1.3599<br>17 |
| Downstream TCR signaling Homo sapiens R-HSA-202424                                                | 3/99  | 0.374707 | 0.585<br>463 | 0 | 0 | 1.385393 | 1.3599<br>17 |
| HS-GAG degradation Homo sapiens R-HSA-2024096                                                     | 1/21  | 0.374711 | 0.585<br>463 | 0 | 0 | 2.215193 | 2.1744<br>32 |
| Cell Cycle Checkpoints Homo sapiens R-HSA-69620                                                   | 5/182 | 0.375538 | 0.585<br>463 | 0 | 0 | 1.252828 | 1.2270<br>13 |
| Degradation of GLI1 by the proteasome Homo sapiens R-HSA-5610780                                  | 2/59  | 0.375903 | 0.585<br>463 | 0 | 0 | 1.555104 | 1.5215<br>52 |
| GLI3 is processed to GLI3R by the proteasome Homo sapiens R-HSA-5610785                           | 2/59  | 0.375903 | 0.585<br>463 | 0 | 0 | 1.555104 | 1.5215<br>52 |
| Degradation of GLI2 by the proteasome Homo sapiens R-HSA-5610783                                  | 2/59  | 0.375903 | 0.585<br>463 | 0 | 0 | 1.555104 | 1.5215<br>52 |

|                                                                                                                  |       |          |              |   |   |          |              |
|------------------------------------------------------------------------------------------------------------------|-------|----------|--------------|---|---|----------|--------------|
| Neurotransmitter Receptor Binding And Downstream Transmission In The Postsynaptic Cell Homo sapiens R-HSA-112314 | 4/142 | 0.384128 | 0.596<br>978 | 0 | 0 | 1.285157 | 1.2296<br>11 |
| Signaling by FGFR3 point mutants in cancer Homo sapiens R-HSA-8853338                                            | 1/22  | 0.388545 | 0.601<br>239 | 0 | 0 | 2.109599 | 1.9943<br>04 |
| Signaling by FGFR3 in disease Homo sapiens R-HSA-5655332                                                         | 1/22  | 0.388545 | 0.601<br>239 | 0 | 0 | 2.109599 | 1.9943<br>04 |
| Cell death signalling via NRAGE. NRIF and NADE Homo sapiens R-HSA-204998                                         | 2/61  | 0.391653 | 0.602<br>157 | 0 | 0 | 1.502234 | 1.4081<br>61 |
| Constitutive Signaling by Aberrant PI3K in Cancer Homo sapiens R-HSA-2219530                                     | 2/61  | 0.391653 | 0.602<br>157 | 0 | 0 | 1.502234 | 1.4081<br>61 |
| Dectin-1 mediated noncanonical NF-kB signaling Homo sapiens R-HSA-5607761                                        | 2/61  | 0.391653 | 0.602<br>157 | 0 | 0 | 1.502234 | 1.4081<br>61 |
| Diseases associated with O-glycosylation of proteins Homo sapiens R-HSA-3906995                                  | 2/62  | 0.399462 | 0.603<br>95  | 0 | 0 | 1.477121 | 1.3554<br>61 |
| Cytochrome P450 - arranged by substrate type Homo sapiens R-HSA-211897                                           | 2/62  | 0.399462 | 0.603<br>95  | 0 | 0 | 1.477121 | 1.3554<br>61 |
| Gap-filling DNA repair synthesis and ligation in TC-NER Homo sapiens R-HSA-6782210                               | 2/62  | 0.399462 | 0.603<br>95  | 0 | 0 | 1.477121 | 1.3554<br>61 |
| Autodegradation of Cdh1 by Cdh1:APC/C Homo sapiens R-HSA-174084                                                  | 2/62  | 0.399462 | 0.603<br>95  | 0 | 0 | 1.477121 | 1.3554<br>61 |
| Dopamine Neurotransmitter Release Cycle Homo sapiens R-HSA-212676                                                | 1/23  | 0.402073 | 0.603<br>95  | 0 | 0 | 2.013605 | 1.8346<br>41 |
| The canonical retinoid cycle in rods (twilight vision) Homo sapiens R-HSA-2453902                                | 1/23  | 0.402073 | 0.603<br>95  | 0 | 0 | 2.013605 | 1.8346<br>41 |
| Incretin synthesis. secretion. and inactivation Homo sapiens R-HSA-400508                                        | 1/23  | 0.402073 | 0.603<br>95  | 0 | 0 | 2.013605 | 1.8346<br>41 |
| Deadenylation of mRNA Homo sapiens R-HSA-429947                                                                  | 1/23  | 0.402073 | 0.603<br>95  | 0 | 0 | 2.013605 | 1.8346<br>41 |
| Signaling by BMP Homo sapiens R-HSA-201451                                                                       | 1/23  | 0.402073 | 0.603<br>95  | 0 | 0 | 2.013605 | 1.8346<br>41 |
| Branched-chain amino acid catabolism Homo sapiens R-HSA-70895                                                    | 1/23  | 0.402073 | 0.603<br>95  | 0 | 0 | 2.013605 | 1.8346<br>41 |

|                                                                                                          |       |          |              |   |   |          |              |
|----------------------------------------------------------------------------------------------------------|-------|----------|--------------|---|---|----------|--------------|
| SHC-mediated cascade:FGFR4<br>Homo sapiens R-HSA-<br>5654719                                             | 1/23  | 0.402073 | 0.603<br>95  | 0 | 0 | 2.013605 | 1.8346<br>41 |
| Dual incision in TC-NER Homo<br>sapiens R-HSA-6782135                                                    | 2/63  | 0.407223 | 0.610<br>409 | 0 | 0 | 1.452832 | 1.3052<br>16 |
| Glutamate Neurotransmitter<br>Release Cycle Homo sapiens<br>R-HSA-210500                                 | 1/24  | 0.415302 | 0.611<br>039 | 0 | 0 | 1.925959 | 1.6924<br>35 |
| Sema4D induced cell<br>migration and growth-cone<br>collapse Homo sapiens R-<br>HSA-416572               | 1/24  | 0.415302 | 0.611<br>039 | 0 | 0 | 1.925959 | 1.6924<br>35 |
| TNFs bind their physiological<br>receptors Homo sapiens R-<br>HSA-5669034                                | 1/24  | 0.415302 | 0.611<br>039 | 0 | 0 | 1.925959 | 1.6924<br>35 |
| Post-Elongation Processing of<br>Intronless pre-mRNA Homo<br>sapiens R-HSA-112297                        | 1/24  | 0.415302 | 0.611<br>039 | 0 | 0 | 1.925959 | 1.6924<br>35 |
| Processing of Capped<br>Intronless Pre-mRNA Homo<br>sapiens R-HSA-75067                                  | 1/24  | 0.415302 | 0.611<br>039 | 0 | 0 | 1.925959 | 1.6924<br>35 |
| Synthesis of bile acids and<br>bile salts via 7alpha-<br>hydroxycholesterol Homo<br>sapiens R-HSA-193368 | 1/24  | 0.415302 | 0.611<br>039 | 0 | 0 | 1.925959 | 1.6924<br>35 |
| Growth hormone receptor<br>signaling Homo sapiens R-<br>HSA-982772                                       | 1/24  | 0.415302 | 0.611<br>039 | 0 | 0 | 1.925959 | 1.6924<br>35 |
| Diseases associated with the<br>TLR signaling cascade Homo<br>sapiens R-HSA-5602358                      | 1/24  | 0.415302 | 0.611<br>039 | 0 | 0 | 1.925959 | 1.6924<br>35 |
| Diseases of Immune System<br>Homo sapiens R-HSA-<br>5260271                                              | 1/24  | 0.415302 | 0.611<br>039 | 0 | 0 | 1.925959 | 1.6924<br>35 |
| Mitotic Prophase Homo<br>sapiens R-HSA-68875                                                             | 3/107 | 0.422352 | 0.617<br>777 | 0 | 0 | 1.278299 | 1.1017<br>86 |
| HATs acetylate histones<br>Homo sapiens R-HSA-<br>3214847                                                | 3/107 | 0.422352 | 0.617<br>777 | 0 | 0 | 1.278299 | 1.1017<br>86 |
| ER-Phagosome pathway<br>Homo sapiens R-HSA-<br>1236974                                                   | 2/65  | 0.422597 | 0.617<br>777 | 0 | 0 | 1.406566 | 1.2115<br>26 |
| G2/M Checkpoints Homo<br>sapiens R-HSA-69481                                                             | 4/150 | 0.42399  | 0.617<br>777 | 0 | 0 | 1.214237 | 1.0418<br>7  |
| Activation of G protein gated<br>Potassium channels Homo<br>sapiens R-HSA-1296041                        | 1/25  | 0.428239 | 0.617<br>777 | 0 | 0 | 1.845616 | 1.5652<br>17 |
| Inhibition of voltage gated<br>Ca2+ channels via<br>Gbeta/gamma subunits<br>Homo sapiens R-HSA-997272    | 1/25  | 0.428239 | 0.617<br>777 | 0 | 0 | 1.845616 | 1.5652<br>17 |

|                                                                                                                |        |          |              |   |   |          |              |
|----------------------------------------------------------------------------------------------------------------|--------|----------|--------------|---|---|----------|--------------|
| G protein gated Potassium channels Homo sapiens R-HSA-1296059                                                  | 1/25   | 0.428239 | 0.617<br>777 | 0 | 0 | 1.845616 | 1.5652<br>17 |
| HDMs demethylate histones Homo sapiens R-HSA-3214842                                                           | 1/25   | 0.428239 | 0.617<br>777 | 0 | 0 | 1.845616 | 1.5652<br>17 |
| Regulation of IFNA signaling Homo sapiens R-HSA-912694                                                         | 1/25   | 0.428239 | 0.617<br>777 | 0 | 0 | 1.845616 | 1.5652<br>17 |
| Regulation of TP53 Activity Homo sapiens R-HSA-5633007                                                         | 4/151  | 0.428933 | 0.617<br>777 | 0 | 0 | 1.205914 | 1.0207<br>52 |
| APC/C:Cdc20 mediated degradation of Securin Homo sapiens R-HSA-174154                                          | 2/66   | 0.430207 | 0.617<br>777 | 0 | 0 | 1.384517 | 1.1678<br>25 |
| Cytosolic sensors of pathogen-associated DNA Homo sapiens R-HSA-1834949                                        | 2/66   | 0.430207 | 0.617<br>777 | 0 | 0 | 1.384517 | 1.1678<br>25 |
| Disease Homo sapiens R-HSA-1643685                                                                             | 17/725 | 0.436279 | 0.618<br>281 | 0 | 0 | 1.064972 | 0.8833<br>66 |
| Macroautophagy Homo sapiens R-HSA-1632852                                                                      | 2/67   | 0.437763 | 0.618<br>281 | 0 | 0 | 1.363147 | 1.1260<br>64 |
| Regulation of RAS by GAPs Homo sapiens R-HSA-5658442                                                           | 2/67   | 0.437763 | 0.618<br>281 | 0 | 0 | 1.363147 | 1.1260<br>64 |
| Assembly of the pre-replicative complex Homo sapiens R-HSA-68867                                               | 2/67   | 0.437763 | 0.618<br>281 | 0 | 0 | 1.363147 | 1.1260<br>64 |
| WNT ligand biogenesis and trafficking Homo sapiens R-HSA-3238698                                               | 1/26   | 0.440891 | 0.618<br>281 | 0 | 0 | 1.771701 | 1.4509<br>48 |
| Fertilization Homo sapiens R-HSA-1187000                                                                       | 1/26   | 0.440891 | 0.618<br>281 | 0 | 0 | 1.771701 | 1.4509<br>48 |
| Reproduction Homo sapiens R-HSA-1474165                                                                        | 1/26   | 0.440891 | 0.618<br>281 | 0 | 0 | 1.771701 | 1.4509<br>48 |
| Diseases associated with glycosaminoglycan metabolism Homo sapiens R-HSA-3560782                               | 1/26   | 0.440891 | 0.618<br>281 | 0 | 0 | 1.771701 | 1.4509<br>48 |
| A tetrasaccharide linker sequence is required for GAG synthesis Homo sapiens R-HSA-1971475                     | 1/26   | 0.440891 | 0.618<br>281 | 0 | 0 | 1.771701 | 1.4509<br>48 |
| Termination of O-glycan biosynthesis Homo sapiens R-HSA-977068                                                 | 1/26   | 0.440891 | 0.618<br>281 | 0 | 0 | 1.771701 | 1.4509<br>48 |
| Resolution of D-loop Structures through Synthesis-Dependent Strand Annealing (SDSA) Homo sapiens R-HSA-5693554 | 1/26   | 0.440891 | 0.618<br>281 | 0 | 0 | 1.771701 | 1.4509<br>48 |

|                                                                                                                              |       |          |              |   |   |          |              |
|------------------------------------------------------------------------------------------------------------------------------|-------|----------|--------------|---|---|----------|--------------|
| SHC-mediated cascade:FGFR2<br>Homo sapiens R-HSA-<br>5654699                                                                 | 1/26  | 0.440891 | 0.618<br>281 | 0 | 0 | 1.771701 | 1.4509<br>48 |
| Interferon alpha/beta<br>signaling Homo sapiens R-<br>HSA-909733                                                             | 2/68  | 0.445265 | 0.622<br>624 | 0 | 0 | 1.342424 | 1.0861<br>37 |
| FCERI mediated NF-kB<br>activation Homo sapiens R-<br>HSA-2871837                                                            | 3/111 | 0.445722 | 0.622<br>624 | 0 | 0 | 1.230701 | 0.9944<br>8  |
| Loss of Nlp from mitotic<br>centrosomes Homo sapiens<br>R-HSA-380259                                                         | 2/69  | 0.45271  | 0.623<br>454 | 0 | 0 | 1.32232  | 1.0479<br>43 |
| Loss of proteins required for<br>interphase microtubule<br>organization?from the<br>centrosome Homo sapiens R-<br>HSA-380284 | 2/69  | 0.45271  | 0.623<br>454 | 0 | 0 | 1.32232  | 1.0479<br>43 |
| Sema4D in semaphorin<br>signaling Homo sapiens R-<br>HSA-400685                                                              | 1/27  | 0.453263 | 0.623<br>454 | 0 | 0 | 1.703471 | 1.3479<br>26 |
| CREB phosphorylation<br>through the activation of Ras<br>Homo sapiens R-HSA-442742                                           | 1/27  | 0.453263 | 0.623<br>454 | 0 | 0 | 1.703471 | 1.3479<br>26 |
| VEGFR2 mediated vascular<br>permeability Homo sapiens R-<br>HSA-5218920                                                      | 1/27  | 0.453263 | 0.623<br>454 | 0 | 0 | 1.703471 | 1.3479<br>26 |
| RORA activates gene<br>expression Homo sapiens R-<br>HSA-1368082                                                             | 1/27  | 0.453263 | 0.623<br>454 | 0 | 0 | 1.703471 | 1.3479<br>26 |
| Pyruvate metabolism Homo<br>sapiens R-HSA-70268                                                                              | 1/27  | 0.453263 | 0.623<br>454 | 0 | 0 | 1.703471 | 1.3479<br>26 |
| Caspase activation via<br>extrinsic apoptotic signalig<br>pathway Homo sapiens R-<br>HSA-5357769                             | 1/27  | 0.453263 | 0.623<br>454 | 0 | 0 | 1.703471 | 1.3479<br>26 |
| PPARA activates gene<br>expression Homo sapiens R-<br>HSA-1989781                                                            | 3/113 | 0.457267 | 0.627<br>759 | 0 | 0 | 1.2082   | 0.9454<br>02 |
| trans-Golgi Network Vesicle<br>Budding Homo sapiens R-<br>HSA-199992                                                         | 2/70  | 0.460098 | 0.629<br>239 | 0 | 0 | 1.302807 | 1.0113<br>9  |
| Clathrin derived vesicle<br>budding Homo sapiens R-<br>HSA-421837                                                            | 2/70  | 0.460098 | 0.629<br>239 | 0 | 0 | 1.302807 | 1.0113<br>9  |
| Energy dependent regulation<br>of mTOR by LKB1-AMPK<br>Homo sapiens R-HSA-380972                                             | 1/28  | 0.465363 | 0.635<br>229 | 0 | 0 | 1.640296 | 1.2547<br>25 |
| APC/C:Cdh1 mediated<br>degradation of Cdc20 and<br>other APC/C:Cdh1 targeted<br>proteins in late mitosis/early               | 2/71  | 0.467428 | 0.635<br>631 | 0 | 0 | 1.28386  | 0.9763<br>89 |

|                                                                                                                                    |       |          |              |   |   |          |              |
|------------------------------------------------------------------------------------------------------------------------------------|-------|----------|--------------|---|---|----------|--------------|
| G1 Homo sapiens R-HSA-174178                                                                                                       |       |          |              |   |   |          |              |
| Cdc20:Phospho-APC/C mediated degradation of Cyclin A Homo sapiens R-HSA-174184                                                     | 2/71  | 0.467428 | 0.635<br>631 | 0 | 0 | 1.28386  | 0.9763<br>89 |
| Epigenetic regulation of gene expression Homo sapiens R-HSA-212165                                                                 | 3/115 | 0.468709 | 0.636<br>169 | 0 | 0 | 1.186503 | 0.8991       |
| Regulation of lipid metabolism by Peroxisome proliferator-activated receptor alpha (PPARalpha) Homo sapiens R-HSA-400206           | 3/116 | 0.47439  | 0.639<br>227 | 0 | 0 | 1.175943 | 0.8769<br>31 |
| APC:Cdc20 mediated degradation of cell cycle proteins prior to satisfaction of the cell cycle checkpoint Homo sapiens R-HSA-179419 | 2/72  | 0.474698 | 0.639<br>227 | 0 | 0 | 1.265455 | 0.9428<br>6  |
| AURKA Activation by TPX2 Homo sapiens R-HSA-8854518                                                                                | 2/72  | 0.474698 | 0.639<br>227 | 0 | 0 | 1.265455 | 0.9428<br>6  |
| Surfactant metabolism Homo sapiens R-HSA-5683826                                                                                   | 1/29  | 0.477195 | 0.639<br>227 | 0 | 0 | 1.581633 | 1.1701<br>41 |
| COPI-independent Golgi-to-ER retrograde traffic Homo sapiens R-HSA-6811436                                                         | 1/29  | 0.477195 | 0.639<br>227 | 0 | 0 | 1.581633 | 1.1701<br>41 |
| Activation of BH3-only proteins Homo sapiens R-HSA-114452                                                                          | 1/29  | 0.477195 | 0.639<br>227 | 0 | 0 | 1.581633 | 1.1701<br>41 |
| PIWI-interacting RNA (piRNA) biogenesis Homo sapiens R-HSA-5601884                                                                 | 1/29  | 0.477195 | 0.639<br>227 | 0 | 0 | 1.581633 | 1.1701<br>41 |
| Role of LAT2/NTAL/LAB on calcium mobilization Homo sapiens R-HSA-2730905                                                           | 4/162 | 0.482439 | 0.645<br>049 | 0 | 0 | 1.121322 | 0.8173<br>32 |
| TCR signaling Homo sapiens R-HSA-202403                                                                                            | 3/118 | 0.485667 | 0.645<br>483 | 0 | 0 | 1.155373 | 0.8344<br>48 |
| Apoptosis Homo sapiens R-HSA-109581                                                                                                | 4/163 | 0.48721  | 0.645<br>483 | 0 | 0 | 1.114213 | 0.8011<br>85 |
| Tight junction interactions Homo sapiens R-HSA-420029                                                                              | 1/30  | 0.488765 | 0.645<br>483 | 0 | 0 | 1.527015 | 1.0931<br>49 |
| Activation of the pre-replicative complex Homo sapiens R-HSA-68962                                                                 | 1/30  | 0.488765 | 0.645<br>483 | 0 | 0 | 1.527015 | 1.0931<br>49 |
| MAPK targets/ Nuclear events mediated by MAP kinases Homo sapiens R-HSA-450282                                                     | 1/30  | 0.488765 | 0.645<br>483 | 0 | 0 | 1.527015 | 1.0931<br>49 |
| Binding and Uptake of Ligands by Scavenger Receptors Homo sapiens R-HSA-2173782                                                    | 2/74  | 0.489057 | 0.645<br>483 | 0 | 0 | 1.230177 | 0.8799<br>17 |

|                                                                                                        |       |          |              |   |   |          |              |
|--------------------------------------------------------------------------------------------------------|-------|----------|--------------|---|---|----------|--------------|
| APC/C:Cdc20 mediated degradation of mitotic proteins Homo sapiens R-HSA-176409                         | 2/74  | 0.489057 | 0.645<br>483 | 0 | 0 | 1.230177 | 0.8799<br>17 |
| Activation of APC/C and APC/C:Cdc20 mediated degradation of mitotic proteins Homo sapiens R-HSA-176814 | 2/75  | 0.496143 | 0.652<br>832 | 0 | 0 | 1.213263 | 0.8503<br>65 |
| Neuronal System Homo sapiens R-HSA-112316                                                              | 7/301 | 0.499159 | 0.652<br>832 | 0 | 0 | 1.054406 | 0.7326<br>34 |
| Inwardly rectifying K+ channels Homo sapiens R-HSA-1296065                                             | 1/31  | 0.500081 | 0.652<br>832 | 0 | 0 | 1.476039 | 1.0228<br>75 |
| Trafficking of AMPA receptors Homo sapiens R-HSA-399719                                                | 1/31  | 0.500081 | 0.652<br>832 | 0 | 0 | 1.476039 | 1.0228<br>75 |
| Glutamate Binding. Activation of AMPA Receptors and Synaptic Plasticity Homo sapiens R-HSA-399721      | 1/31  | 0.500081 | 0.652<br>832 | 0 | 0 | 1.476039 | 1.0228<br>75 |
| Export of Viral Ribonucleoproteins from Nucleus Homo sapiens R-HSA-168274                              | 1/31  | 0.500081 | 0.652<br>832 | 0 | 0 | 1.476039 | 1.0228<br>75 |
| Programmed Cell Death Homo sapiens R-HSA-5357801                                                       | 4/166 | 0.501413 | 0.653<br>384 | 0 | 0 | 1.09341  | 0.7548<br>08 |
| Transcription-Coupled Nucleotide Excision Repair (TC-NER) Homo sapiens R-HSA-6781827                   | 2/76  | 0.503167 | 0.654<br>481 | 0 | 0 | 1.196806 | 0.8220<br>07 |
| Activation of Matrix Metalloproteinases Homo sapiens R-HSA-1592389                                     | 1/32  | 0.511146 | 0.661<br>266 | 0 | 0 | 1.428352 | 0.9585<br>67 |
| RNA Polymerase I Transcription Termination Homo sapiens R-HSA-73863                                    | 1/32  | 0.511146 | 0.661<br>266 | 0 | 0 | 1.428352 | 0.9585<br>67 |
| Gluconeogenesis Homo sapiens R-HSA-70263                                                               | 1/32  | 0.511146 | 0.661<br>266 | 0 | 0 | 1.428352 | 0.9585<br>67 |
| C-type lectin receptors (CLRs) Homo sapiens R-HSA-5621481                                              | 3/123 | 0.513334 | 0.662<br>902 | 0 | 0 | 1.106948 | 0.7381<br>45 |
| G2/M DNA damage checkpoint Homo sapiens R-HSA-69473                                                    | 2/78  | 0.517023 | 0.665<br>712 | 0 | 0 | 1.165191 | 0.7686<br>4  |
| S Phase Homo sapiens R-HSA-69242                                                                       | 3/124 | 0.518772 | 0.665<br>712 | 0 | 0 | 1.097743 | 0.7204<br>38 |
| Inactivation. recovery and regulation of the phototransduction cascade Homo sapiens R-HSA-2514859      | 1/33  | 0.521967 | 0.665<br>712 | 0 | 0 | 1.383645 | 0.8995<br>78 |

|                                                                                          |        |          |              |   |   |          |              |
|------------------------------------------------------------------------------------------|--------|----------|--------------|---|---|----------|--------------|
| Resolution of D-Loop Structures Homo sapiens R-HSA-5693537                               | 1/33   | 0.521967 | 0.665<br>712 | 0 | 0 | 1.383645 | 0.8995<br>78 |
| PI3K Cascade Homo sapiens R-HSA-109704                                                   | 2/79   | 0.523854 | 0.665<br>712 | 0 | 0 | 1.15     | 0.7435<br>24 |
| Regulation of APC/C activators between G1/S and early anaphase Homo sapiens R-HSA-176408 | 2/79   | 0.523854 | 0.665<br>712 | 0 | 0 | 1.15     | 0.7435<br>24 |
| RIG-I/MDA5 mediated induction of IFN-alpha/beta pathways Homo sapiens R-HSA-168928       | 2/79   | 0.523854 | 0.665<br>712 | 0 | 0 | 1.15     | 0.7435<br>24 |
| Centrosome maturation Homo sapiens R-HSA-380287                                          | 2/79   | 0.523854 | 0.665<br>712 | 0 | 0 | 1.15     | 0.7435<br>24 |
| Recruitment of mitotic centrosome proteins and complexes Homo sapiens R-HSA-380270       | 2/79   | 0.523854 | 0.665<br>712 | 0 | 0 | 1.15     | 0.7435<br>24 |
| Vesicle-mediated transport Homo sapiens R-HSA-5653656                                    | 11/492 | 0.527362 | 0.668<br>986 | 0 | 0 | 1.012233 | 0.6476<br>95 |
| The phototransduction cascade Homo sapiens R-HSA-2514856                                 | 1/34   | 0.532549 | 0.674<br>374 | 0 | 0 | 1.341648 | 0.8453<br>46 |
| Peptide hormone metabolism Homo sapiens R-HSA-2980736                                    | 2/81   | 0.53732  | 0.679<br>218 | 0 | 0 | 1.120771 | 0.6961<br>79 |
| Post NMDA receptor activation events Homo sapiens R-HSA-438064                           | 1/35   | 0.542897 | 0.683<br>992 | 0 | 0 | 1.302121 | 0.7953<br>82 |
| Global Genome Nucleotide Excision Repair (GG-NER) Homo sapiens R-HSA-5696399             | 2/82   | 0.543955 | 0.683<br>992 | 0 | 0 | 1.106705 | 0.6738<br>61 |
| Antigen processing-Cross presentation Homo sapiens R-HSA-1236975                         | 2/82   | 0.543955 | 0.683<br>992 | 0 | 0 | 1.106705 | 0.6738<br>61 |
| p75 NTR receptor-mediated signalling Homo sapiens R-HSA-193704                           | 2/83   | 0.550522 | 0.689<br>834 | 0 | 0 | 1.092985 | 0.6523<br>9  |
| PI5P, PP2A and IER3 Regulate PI3K/AKT Signaling Homo sapiens R-HSA-6811558               | 2/83   | 0.550522 | 0.689<br>834 | 0 | 0 | 1.092985 | 0.6523<br>9  |
| Class B/2 (Secretin family receptors) Homo sapiens R-HSA-373080                          | 2/84   | 0.557023 | 0.696<br>764 | 0 | 0 | 1.079601 | 0.6317<br>27 |
| Intra-Golgi and retrograde Golgi-to-ER traffic Homo sapiens R-HSA-6811442                | 4/179  | 0.560816 | 0.697<br>521 | 0 | 0 | 1.011507 | 0.5850<br>18 |

|                                                                                             |       |          |              |   |   |          |              |
|---------------------------------------------------------------------------------------------|-------|----------|--------------|---|---|----------|--------------|
| Chromatin organization<br>Homo sapiens R-HSA-<br>4839726                                    | 5/226 | 0.561494 | 0.697<br>521 | 0 | 0 | 1.001118 | 0.5778       |
| Chromatin modifying<br>enzymes Homo sapiens R-<br>HSA-3247509                               | 5/226 | 0.561494 | 0.697<br>521 | 0 | 0 | 1.001118 | 0.5778       |
| Defective B3GALTL causes<br>Peters-plus syndrome (PpS)<br>Homo sapiens R-HSA-<br>5083635    | 1/37  | 0.562913 | 0.697<br>521 | 0 | 0 | 1.229655 | 0.7065<br>97 |
| APC/C-mediated degradation<br>of cell cycle proteins Homo<br>sapiens R-HSA-174143           | 2/85  | 0.563457 | 0.697<br>521 | 0 | 0 | 1.066539 | 0.6118<br>35 |
| Regulation of mitotic cell<br>cycle Homo sapiens R-HSA-<br>453276                           | 2/85  | 0.563457 | 0.697<br>521 | 0 | 0 | 1.066539 | 0.6118<br>35 |
| O-glycosylation of TSR<br>domain-containing proteins<br>Homo sapiens R-HSA-<br>5173214      | 1/38  | 0.57259  | 0.705<br>18  | 0 | 0 | 1.19636  | 0.6670<br>72 |
| Glutathione conjugation<br>Homo sapiens R-HSA-156590                                        | 1/38  | 0.57259  | 0.705<br>18  | 0 | 0 | 1.19636  | 0.6670<br>72 |
| Signaling by FGFR1 in disease<br>Homo sapiens R-HSA-<br>5655302                             | 1/38  | 0.57259  | 0.705<br>18  | 0 | 0 | 1.19636  | 0.6670<br>72 |
| Signaling by Hedgehog Homo<br>sapiens R-HSA-5358351                                         | 3/136 | 0.581335 | 0.709<br>533 | 0 | 0 | 0.998082 | 0.5413<br>87 |
| GABA B receptor activation<br>Homo sapiens R-HSA-977444                                     | 1/39  | 0.582054 | 0.709<br>533 | 0 | 0 | 1.164817 | 0.6303<br>89 |
| Activation of GABAB<br>receptors Homo sapiens R-<br>HSA-991365                              | 1/39  | 0.582054 | 0.709<br>533 | 0 | 0 | 1.164817 | 0.6303<br>89 |
| mTOR signalling Homo<br>sapiens R-HSA-165159                                                | 1/39  | 0.582054 | 0.709<br>533 | 0 | 0 | 1.164817 | 0.6303<br>89 |
| NS1 Mediated Effects on Host<br>Pathways Homo sapiens R-<br>HSA-168276                      | 1/39  | 0.582054 | 0.709<br>533 | 0 | 0 | 1.164817 | 0.6303<br>89 |
| Nuclear signaling by ERBB4<br>Homo sapiens R-HSA-<br>1251985                                | 1/39  | 0.582054 | 0.709<br>533 | 0 | 0 | 1.164817 | 0.6303<br>89 |
| Membrane Trafficking Homo<br>sapiens R-HSA-199991                                           | 9/420 | 0.584425 | 0.711<br>216 | 0 | 0 | 0.968308 | 0.5201<br>03 |
| PKB-mediated events Homo<br>sapiens R-HSA-109703                                            | 1/40  | 0.591309 | 0.717<br>162 | 0 | 0 | 1.134892 | 0.5962<br>91 |
| Transcriptional activation of<br>mitochondrial biogenesis<br>Homo sapiens R-HSA-<br>2151201 | 1/40  | 0.591309 | 0.717<br>162 | 0 | 0 | 1.134892 | 0.5962<br>91 |
| Negative regulation of the<br>PI3K/AKT network Homo<br>sapiens R-HSA-199418                 | 2/90  | 0.594615 | 0.719<br>956 | 0 | 0 | 1.005682 | 0.5227<br>94 |

|                                                                                                 |       |          |              |   |   |          |              |
|-------------------------------------------------------------------------------------------------|-------|----------|--------------|---|---|----------|--------------|
| Intraflagellar transport Homo sapiens R-HSA-5620924                                             | 1/41  | 0.600359 | 0.724<br>192 | 0 | 0 | 1.106463 | 0.5645<br>48 |
| Host Interactions with Influenza Factors Homo sapiens R-HSA-168253                              | 1/41  | 0.600359 | 0.724<br>192 | 0 | 0 | 1.106463 | 0.5645<br>48 |
| DNA Repair Homo sapiens R-HSA-73894                                                             | 6/285 | 0.604614 | 0.724<br>192 | 0 | 0 | 0.950922 | 0.4784<br>72 |
| Factors involved in megakaryocyte development and platelet production Homo sapiens R-HSA-983231 | 3/141 | 0.605838 | 0.724<br>192 | 0 | 0 | 0.961672 | 0.4819<br>34 |
| HIV Life Cycle Homo sapiens R-HSA-162587                                                        | 3/141 | 0.605838 | 0.724<br>192 | 0 | 0 | 0.961672 | 0.4819<br>34 |
| Signaling by Retinoic Acid Homo sapiens R-HSA-5362517                                           | 1/42  | 0.609209 | 0.724<br>192 | 0 | 0 | 1.07942  | 0.5349<br>54 |
| Non-integrin membrane-ECM interactions Homo sapiens R-HSA-3000171                               | 1/42  | 0.609209 | 0.724<br>192 | 0 | 0 | 1.07942  | 0.5349<br>54 |
| Intrinsic Pathway for Apoptosis Homo sapiens R-HSA-109606                                       | 1/42  | 0.609209 | 0.724<br>192 | 0 | 0 | 1.07942  | 0.5349<br>54 |
| Glucose transport Homo sapiens R-HSA-70153                                                      | 1/42  | 0.609209 | 0.724<br>192 | 0 | 0 | 1.07942  | 0.5349<br>54 |
| BMAL1:CLOCK.NPAS2 activates circadian gene expression Homo sapiens R-HSA-1368108                | 1/42  | 0.609209 | 0.724<br>192 | 0 | 0 | 1.07942  | 0.5349<br>54 |
| Activation of gene expression by SREBF (SREBP) Homo sapiens R-HSA-2426168                       | 1/42  | 0.609209 | 0.724<br>192 | 0 | 0 | 1.07942  | 0.5349<br>54 |
| Interferon gamma signaling Homo sapiens R-HSA-877300                                            | 2/93  | 0.612498 | 0.726<br>898 | 0 | 0 | 0.972378 | 0.4766<br>69 |
| Signaling by FGFR2 in disease Homo sapiens R-HSA-5655253                                        | 1/43  | 0.617864 | 0.732<br>056 | 0 | 0 | 1.053666 | 0.5073<br>27 |
| Beta-catenin independent WNT signaling Homo sapiens R-HSA-3858494                               | 3/144 | 0.620077 | 0.732<br>467 | 0 | 0 | 0.941065 | 0.4497<br>47 |
| Peptide ligand-binding receptors Homo sapiens R-HSA-375276                                      | 4/193 | 0.620251 | 0.732<br>467 | 0 | 0 | 0.935904 | 0.4470<br>17 |
| Influenza Infection Homo sapiens R-HSA-168254                                                   | 3/147 | 0.633962 | 0.746<br>668 | 0 | 0 | 0.921317 | 0.4199<br>06 |
| RMTs methylate histone arginines Homo sapiens R-HSA-3214858                                     | 1/45  | 0.634603 | 0.746<br>668 | 0 | 0 | 1.005669 | 0.4573<br>33 |
| Anchoring of the basal body to the plasma membrane Homo sapiens R-HSA-5620912                   | 2/97  | 0.635396 | 0.746<br>668 | 0 | 0 | 0.931244 | 0.4223<br>26 |

|                                                                                                                               |       |          |              |   |   |          |              |
|-------------------------------------------------------------------------------------------------------------------------------|-------|----------|--------------|---|---|----------|--------------|
| Potassium Channels Homo sapiens R-HSA-1296071                                                                                 | 2/99  | 0.646442 | 0.757<br>17  | 0 | 0 | 0.911949 | 0.3978<br>58 |
| Hedgehog 'off' state Homo sapiens R-HSA-5610787                                                                               | 2/99  | 0.646442 | 0.757<br>17  | 0 | 0 | 0.911949 | 0.3978<br>58 |
| Nucleotide-binding domain. leucine rich repeat containing receptor (NLR) signaling pathways Homo sapiens R-HSA-168643         | 1/47  | 0.650611 | 0.759<br>803 | 0 | 0 | 0.961846 | 0.4134<br>42 |
| Infectious disease Homo sapiens R-HSA-5663205                                                                                 | 7/348 | 0.651851 | 0.759<br>803 | 0 | 0 | 0.906859 | 0.3880<br>81 |
| Stimuli-sensing channels Homo sapiens R-HSA-2672351                                                                           | 2/100 | 0.651865 | 0.759<br>803 | 0 | 0 | 0.902597 | 0.3862<br>38 |
| Transport of glucose and other sugars. bile salts and organic acids. metal ions and amine compounds Homo sapiens R-HSA-425366 | 2/101 | 0.657221 | 0.763<br>645 | 0 | 0 | 0.893434 | 0.3750<br>05 |
| EPH-ephrin mediated repulsion of cells Homo sapiens R-HSA-3928665                                                             | 1/48  | 0.658351 | 0.763<br>645 | 0 | 0 | 0.941333 | 0.3934<br>93 |
| Pyruvate metabolism and Citric Acid (TCA) cycle Homo sapiens R-HSA-71406                                                      | 1/48  | 0.658351 | 0.763<br>645 | 0 | 0 | 0.941333 | 0.3934<br>93 |
| Retrograde transport at the Trans-Golgi-Network Homo sapiens R-HSA-6811440                                                    | 1/49  | 0.66592  | 0.771<br>178 | 0 | 0 | 0.921674 | 0.3747<br>4  |
| Chondroitin sulfate/dermatan sulfate metabolism Homo sapiens R-HSA-1793185                                                    | 1/50  | 0.673321 | 0.777<br>242 | 0 | 0 | 0.902818 | 0.3570<br>95 |
| Deadenylation-dependent mRNA decay Homo sapiens R-HSA-429914                                                                  | 1/50  | 0.673321 | 0.777<br>242 | 0 | 0 | 0.902818 | 0.3570<br>95 |
| Platelet degranulation Homo sapiens R-HSA-114608                                                                              | 2/105 | 0.67799  | 0.781<br>376 | 0 | 0 | 0.858561 | 0.3336<br>56 |
| Degradation of the extracellular matrix Homo sapiens R-HSA-1474228                                                            | 2/106 | 0.68302  | 0.785<br>77  | 0 | 0 | 0.850262 | 0.3241<br>47 |
| Antigen processing: Ubiquitination & Proteasome degradation Homo sapiens R-HSA-983168                                         | 5/260 | 0.683992 | 0.785<br>77  | 0 | 0 | 0.86611  | 0.3289<br>57 |
| Nucleotide Excision Repair Homo sapiens R-HSA-5696398                                                                         | 2/108 | 0.692886 | 0.794<br>716 | 0 | 0 | 0.834134 | 0.3060<br>35 |
| Arachidonic acid metabolism Homo sapiens R-HSA-2142753                                                                        | 1/53  | 0.694557 | 0.795<br>362 | 0 | 0 | 0.850602 | 0.3100<br>28 |
| Cell Cycle. Mitotic Homo sapiens R-HSA-69278                                                                                  | 9/462 | 0.695789 | 0.795<br>504 | 0 | 0 | 0.876604 | 0.3179<br>52 |

|                                                                                    |       |          |              |   |   |          |              |
|------------------------------------------------------------------------------------|-------|----------|--------------|---|---|----------|--------------|
| Response to elevated platelet cytosolic Ca <sup>2+</sup> Homo sapiens R-HSA-76005  | 2/110 | 0.702498 | 0.800<br>625 | 0 | 0 | 0.818603 | 0.2890<br>59 |
| O-linked glycosylation Homo sapiens R-HSA-5173105                                  | 2/110 | 0.702498 | 0.800<br>625 | 0 | 0 | 0.818603 | 0.2890<br>59 |
| GABA receptor activation Homo sapiens R-HSA-977443                                 | 1/55  | 0.707944 | 0.803<br>667 | 0 | 0 | 0.819014 | 0.2828<br>79 |
| Regulation of cholesterol biosynthesis by SREBP (SREBF) Homo sapiens R-HSA-1655829 | 1/55  | 0.707944 | 0.803<br>667 | 0 | 0 | 0.819014 | 0.2828<br>79 |
| M Phase Homo sapiens R-HSA-68886                                                   | 5/268 | 0.7092   | 0.803<br>667 | 0 | 0 | 0.839417 | 0.2884<br>39 |
| Fatty acid. triacylglycerol. and ketone body metabolism Homo sapiens R-HSA-535734  | 4/217 | 0.709645 | 0.803<br>667 | 0 | 0 | 0.829421 | 0.2844<br>84 |
| tRNA processing in the nucleus Homo sapiens R-HSA-6784531                          | 1/57  | 0.720745 | 0.814<br>708 | 0 | 0 | 0.789683 | 0.2585<br>97 |
| Class A/1 (Rhodopsin-like receptors) Homo sapiens R-HSA-373076                     | 6/323 | 0.721663 | 0.814<br>708 | 0 | 0 | 0.835282 | 0.2724<br>66 |
| rRNA modification in the nucleus Homo sapiens R-HSA-6790901                        | 1/58  | 0.726935 | 0.819<br>371 | 0 | 0 | 0.775789 | 0.2474<br>14 |
| Translocation of GLUT4 to the plasma membrane Homo sapiens R-HSA-1445148           | 1/60  | 0.738905 | 0.827<br>666 | 0 | 0 | 0.749414 | 0.2267<br>62 |
| Cleavage of Growing Transcript in the Termination Region Homo sapiens R-HSA-109688 | 1/60  | 0.738905 | 0.827<br>666 | 0 | 0 | 0.749414 | 0.2267<br>62 |
| RNA Polymerase II Transcription Termination Homo sapiens R-HSA-73856               | 1/60  | 0.738905 | 0.827<br>666 | 0 | 0 | 0.749414 | 0.2267<br>62 |
| Post-Elongation Processing of the Transcript Homo sapiens R-HSA-76044              | 1/60  | 0.738905 | 0.827<br>666 | 0 | 0 | 0.749414 | 0.2267<br>62 |
| Cell-cell junction organization Homo sapiens R-HSA-421270                          | 1/61  | 0.744693 | 0.831<br>554 | 0 | 0 | 0.736886 | 0.2172<br>22 |
| TP53 Regulates Transcription of DNA Repair Genes Homo sapiens R-HSA-6796648        | 1/61  | 0.744693 | 0.831<br>554 | 0 | 0 | 0.736886 | 0.2172<br>22 |
| FCERI mediated Ca <sup>2+</sup> mobilization Homo sapiens R-HSA-2871809            | 1/62  | 0.750352 | 0.835<br>966 | 0 | 0 | 0.724769 | 0.2081<br>63 |
| Glycosaminoglycan metabolism Homo sapiens R-HSA-1630316                            | 2/121 | 0.750972 | 0.835<br>966 | 0 | 0 | 0.742513 | 0.2126<br>46 |
| Rho GTPase cycle Homo sapiens R-HSA-194840                                         | 2/122 | 0.755024 | 0.837<br>541 | 0 | 0 | 0.736288 | 0.2069<br>01 |

|                                                                                  |             |          |              |   |   |          |              |
|----------------------------------------------------------------------------------|-------------|----------|--------------|---|---|----------|--------------|
| Collagen biosynthesis and modifying enzymes Homo sapiens R-HSA-1650814           | 1/63        | 0.755887 | 0.837<br>541 | 0 | 0 | 0.713042 | 0.1995<br>55 |
| Signaling by FGFR in disease Homo sapiens R-HSA-1226099                          | 1/63        | 0.755887 | 0.837<br>541 | 0 | 0 | 0.713042 | 0.1995<br>55 |
| O-linked glycosylation of mucins Homo sapiens R-HSA-913709                       | 1/66        | 0.771766 | 0.853<br>818 | 0 | 0 | 0.680028 | 0.1761<br>78 |
| GPCR ligand binding Homo sapiens R-HSA-500792                                    | 8/447       | 0.77468  | 0.855<br>724 | 0 | 0 | 0.802788 | 0.2049<br>56 |
| Late Phase of HIV Life Cycle Homo sapiens R-HSA-162599                           | 2/128       | 0.778158 | 0.858<br>245 | 0 | 0 | 0.70101  | 0.1758<br>32 |
| Host Interactions of HIV factors Homo sapiens R-HSA-162909                       | 2/129       | 0.781822 | 0.860<br>964 | 0 | 0 | 0.695455 | 0.1711<br>71 |
| G alpha (q) signalling events Homo sapiens R-HSA-416476                          | 3/191       | 0.797157 | 0.876<br>506 | 0 | 0 | 0.704091 | 0.1596<br>2  |
| Immune System Homo sapiens R-HSA-168256                                          | 30/154<br>7 | 0.798841 | 0.877<br>015 | 0 | 0 | 0.865962 | 0.1944<br>9  |
| Influenza Life Cycle Homo sapiens R-HSA-168255                                   | 2/136       | 0.806017 | 0.883<br>517 | 0 | 0 | 0.658887 | 0.1420<br>9  |
| Class I MHC mediated antigen processing & presentation Homo sapiens R-HSA-983169 | 5/305       | 0.807224 | 0.883<br>517 | 0 | 0 | 0.734477 | 0.1572<br>91 |
| G alpha (s) signalling events Homo sapiens R-HSA-418555                          | 2/142       | 0.824827 | 0.900<br>906 | 0 | 0 | 0.630455 | 0.1214<br>14 |
| COPI-mediated anterograde transport Homo sapiens R-HSA-6807878                   | 1/78        | 0.825622 | 0.900<br>906 | 0 | 0 | 0.573696 | 0.1099<br>31 |
| Complement cascade Homo sapiens R-HSA-166658                                     | 1/80        | 0.833274 | 0.907<br>876 | 0 | 0 | 0.559115 | 0.1019<br>79 |
| Metabolism of vitamins and cofactors Homo sapiens R-HSA-196854                   | 2/148       | 0.841983 | 0.915<br>976 | 0 | 0 | 0.604359 | 0.1039<br>47 |
| Signal Transduction Homo sapiens R-HSA-162582                                    | 48/246<br>5 | 0.846621 | 0.916<br>517 | 0 | 0 | 0.863982 | 0.1438<br>54 |
| Mitochondrial translation initiation Homo sapiens R-HSA-5368286                  | 1/84        | 0.847587 | 0.916<br>517 | 0 | 0 | 0.53206  | 0.0879<br>82 |
| Mitochondrial translation termination Homo sapiens R-HSA-5419276                 | 1/84        | 0.847587 | 0.916<br>517 | 0 | 0 | 0.53206  | 0.0879<br>82 |
| Mitochondrial translation elongation Homo sapiens R-HSA-5389840                  | 1/84        | 0.847587 | 0.916<br>517 | 0 | 0 | 0.53206  | 0.0879<br>82 |
| Organelle biogenesis and maintenance Homo sapiens R-HSA-1852241                  | 5/326       | 0.850018 | 0.917<br>412 | 0 | 0 | 0.685679 | 0.1114<br>21 |
| Collagen formation Homo sapiens R-HSA-1474290                                    | 1/85        | 0.85097  | 0.917<br>412 | 0 | 0 | 0.525699 | 0.0848<br>37 |

|                                                                                                                 |        |          |              |   |   |          |              |
|-----------------------------------------------------------------------------------------------------------------|--------|----------|--------------|---|---|----------|--------------|
| Cell junction organization<br>Homo sapiens R-HSA-446728                                                         | 1/86   | 0.854277 | 0.919<br>107 | 0 | 0 | 0.519488 | 0.0818<br>19 |
| The citric acid (TCA) cycle and<br>respiratory electron transport<br>Homo sapiens R-HSA-<br>1428517             | 2/153  | 0.855102 | 0.919<br>107 | 0 | 0 | 0.584196 | 0.0914<br>47 |
| Adaptive Immune System<br>Homo sapiens R-HSA-<br>1280218                                                        | 13/762 | 0.86448  | 0.926<br>835 | 0 | 0 | 0.760974 | 0.1108<br>19 |
| Immunoregulatory<br>interactions between a<br>Lymphoid and a non-<br>Lymphoid cell Homo sapiens<br>R-HSA-198933 | 2/157  | 0.864874 | 0.926<br>835 | 0 | 0 | 0.569003 | 0.0826<br>03 |
| Mitochondrial translation<br>Homo sapiens R-HSA-<br>5368287                                                     | 1/90   | 0.866791 | 0.927<br>505 | 0 | 0 | 0.496038 | 0.0709<br>12 |
| HIV Infection Homo sapiens<br>R-HSA-162906                                                                      | 3/222  | 0.871524 | 0.931<br>181 | 0 | 0 | 0.603457 | 0.0829<br>83 |
| Extracellular matrix<br>organization Homo sapiens R-<br>HSA-1474244                                             | 4/283  | 0.874714 | 0.933<br>202 | 0 | 0 | 0.631054 | 0.0844<br>71 |
| Separation of Sister<br>Chromatids Homo sapiens R-<br>HSA-2467813                                               | 2/162  | 0.876239 | 0.933<br>442 | 0 | 0 | 0.55108  | 0.0728<br>07 |
| Cell Cycle Homo sapiens R-<br>HSA-1640170                                                                       | 9/566  | 0.881812 | 0.937<br>986 | 0 | 0 | 0.709048 | 0.0891<br>82 |
| L1CAM interactions Homo<br>sapiens R-HSA-373760                                                                 | 1/96   | 0.88358  | 0.938<br>477 | 0 | 0 | 0.464566 | 0.0575<br>01 |
| Regulation of actin dynamics<br>for phagocytic cup formation<br>Homo sapiens R-HSA-<br>2029482                  | 1/97   | 0.886165 | 0.939<br>833 | 0 | 0 | 0.459703 | 0.0555<br>56 |
| Phase II conjugation Homo<br>sapiens R-HSA-156580                                                               | 1/100  | 0.893583 | 0.946<br>301 | 0 | 0 | 0.445704 | 0.0501<br>49 |
| Cell surface interactions at<br>the vascular wall Homo<br>sapiens R-HSA-202733                                  | 1/101  | 0.895946 | 0.946<br>664 | 0 | 0 | 0.441224 | 0.0484<br>8  |
| Mitotic Anaphase Homo<br>sapiens R-HSA-68882                                                                    | 2/173  | 0.898207 | 0.946<br>664 | 0 | 0 | 0.515338 | 0.0553<br>24 |
| Mitotic Metaphase and<br>Anaphase Homo sapiens R-<br>HSA-2555396                                                | 2/174  | 0.900014 | 0.946<br>664 | 0 | 0 | 0.512315 | 0.0539<br>7  |
| MHC class II antigen<br>presentation Homo sapiens<br>R-HSA-2132295                                              | 1/103  | 0.900517 | 0.946<br>664 | 0 | 0 | 0.432529 | 0.0453<br>23 |
| tRNA processing Homo<br>sapiens R-HSA-72306                                                                     | 1/103  | 0.900517 | 0.946<br>664 | 0 | 0 | 0.432529 | 0.0453<br>23 |
| G alpha (i) signalling events<br>Homo sapiens R-HSA-418594                                                      | 3/240  | 0.902659 | 0.947<br>528 | 0 | 0 | 0.557106 | 0.0570<br>53 |

|                                                                                                                                               |       |          |              |   |   |          |              |
|-----------------------------------------------------------------------------------------------------------------------------------------------|-------|----------|--------------|---|---|----------|--------------|
| Nonsense-Mediated Decay (NMD) Homo sapiens R-HSA-927802                                                                                       | 1/106 | 0.907001 | 0.949<br>31  | 0 | 0 | 0.420106 | 0.0410<br>07 |
| Nonsense Mediated Decay (NMD) enhanced by the Exon Junction Complex (EJC) Homo sapiens R-HSA-975957                                           | 1/106 | 0.907001 | 0.949<br>31  | 0 | 0 | 0.420106 | 0.0410<br>07 |
| Signaling by Rho GTPases Homo sapiens R-HSA-194315                                                                                            | 5/367 | 0.911022 | 0.952<br>125 | 0 | 0 | 0.606723 | 0.0565<br>39 |
| Respiratory electron transport. ATP synthesis by chemiosmotic coupling. and heat production by uncoupling proteins. Homo sapiens R-HSA-163200 | 1/109 | 0.913063 | 0.952<br>125 | 0 | 0 | 0.408373 | 0.0371<br>42 |
| Integration of energy metabolism Homo sapiens R-HSA-163685                                                                                    | 1/110 | 0.914995 | 0.952<br>125 | 0 | 0 | 0.404606 | 0.0359<br>44 |
| Golgi-to-ER retrograde transport Homo sapiens R-HSA-8856688                                                                                   | 1/110 | 0.914995 | 0.952<br>125 | 0 | 0 | 0.404606 | 0.0359<br>44 |
| Assembly of the primary cilium Homo sapiens R-HSA-5617833                                                                                     | 2/187 | 0.920928 | 0.956<br>913 | 0 | 0 | 0.475995 | 0.0392<br>09 |
| RHO GTPase Effectors Homo sapiens R-HSA-195258                                                                                                | 3/255 | 0.923222 | 0.957<br>91  | 0 | 0 | 0.523538 | 0.0418<br>23 |
| Fcgamma receptor (FCGR) dependent phagocytosis Homo sapiens R-HSA-2029480                                                                     | 1/120 | 0.932107 | 0.965<br>733 | 0 | 0 | 0.370415 | 0.0260<br>43 |
| RNA Polymerase II Transcription Homo sapiens R-HSA-73857                                                                                      | 1/124 | 0.937947 | 0.970<br>383 | 0 | 0 | 0.358295 | 0.0229<br>53 |
| Ion channel transport Homo sapiens R-HSA-983712                                                                                               | 2/203 | 0.941035 | 0.972<br>177 | 0 | 0 | 0.437743 | 0.0266<br>04 |
| Influenza Viral RNA Transcription and Replication Homo sapiens R-HSA-168273                                                                   | 1/128 | 0.943285 | 0.973<br>102 | 0 | 0 | 0.346939 | 0.0202<br>57 |
| Cell-Cell communication Homo sapiens R-HSA-1500931                                                                                            | 1/131 | 0.946986 | 0.974<br>12  | 0 | 0 | 0.33888  | 0.0184<br>59 |
| ER to Golgi Anterograde Transport Homo sapiens R-HSA-199977                                                                                   | 1/131 | 0.946986 | 0.974<br>12  | 0 | 0 | 0.33888  | 0.0184<br>59 |
| mRNA Splicing - Major Pathway Homo sapiens R-HSA-72163                                                                                        | 1/134 | 0.950446 | 0.976<br>017 | 0 | 0 | 0.331185 | 0.0168<br>32 |
| Cardiac conduction Homo sapiens R-HSA-5576891                                                                                                 | 1/135 | 0.951549 | 0.976<br>017 | 0 | 0 | 0.328697 | 0.0163<br>25 |
| mRNA Splicing Homo sapiens R-HSA-72172                                                                                                        | 1/144 | 0.960432 | 0.983<br>724 | 0 | 0 | 0.307867 | 0.0124<br>29 |

|                                                                              |         |          |          |   |   |          |          |
|------------------------------------------------------------------------------|---------|----------|----------|---|---|----------|----------|
| Metabolism of proteins Homo sapiens R-HSA-392499                             | 16/1074 | 0.966751 | 0.988155 | 0 | 0 | 0.656745 | 0.022207 |
| Signaling by GPCR Homo sapiens R-HSA-372790                                  | 20/1293 | 0.967511 | 0.988155 | 0 | 0 | 0.680744 | 0.022484 |
| Transport to the Golgi and subsequent modification Homo sapiens R-HSA-948021 | 1/162   | 0.973619 | 0.99298  | 0 | 0 | 0.273193 | 0.007304 |
| Major pathway of rRNA processing in the nucleolus Homo sapiens R-HSA-6791226 | 1/166   | 0.975892 | 0.993657 | 0 | 0 | 0.266515 | 0.006504 |
| Platelet activation, signaling and aggregation Homo sapiens R-HSA-76002      | 2/253   | 0.97705  | 0.993657 | 0 | 0 | 0.349638 | 0.008118 |
| rRNA processing Homo sapiens R-HSA-72312                                     | 1/180   | 0.982417 | 0.996514 | 0 | 0 | 0.245493 | 0.004355 |
| SLC-mediated transmembrane transport Homo sapiens R-HSA-425407               | 2/268   | 0.982821 | 0.996514 | 0 | 0 | 0.329665 | 0.005712 |
| Hemostasis Homo sapiens R-HSA-109582                                         | 6/552   | 0.984023 | 0.996514 | 0 | 0 | 0.479181 | 0.007718 |
| Processing of Capped Intron-Containing Pre-mRNA Homo sapiens R-HSA-72203     | 1/193   | 0.986886 | 0.997469 | 0 | 0 | 0.228718 | 0.003019 |
| Muscle contraction Homo sapiens R-HSA-397014                                 | 1/196   | 0.987744 | 0.997469 | 0 | 0 | 0.225164 | 0.002777 |
| Metabolism of lipids and lipoproteins Homo sapiens R-HSA-556833              | 7/659   | 0.991372 | 0.999727 | 0 | 0 | 0.466617 | 0.004043 |
| Metabolism Homo sapiens R-HSA-1430728                                        | 28/1908 | 0.994177 | 0.999833 | 0 | 0 | 0.635965 | 0.003714 |
| Asparagine N-linked glycosylation Homo sapiens R-HSA-446203                  | 1/259   | 0.997048 | 0.999833 | 0 | 0 | 0.169629 | 5.01E-04 |
| Transmembrane transport of small molecules Homo sapiens R-HSA-382551         | 4/594   | 0.999229 | 0.999833 | 0 | 0 | 0.2936   | 2.26E-04 |
| Post-translational protein modification Homo sapiens R-HSA-597592            | 3/521   | 0.999351 | 0.999833 | 0 | 0 | 0.251185 | 1.63E-04 |
| Metabolism of amino acids and derivatives Homo sapiens R-HSA-71291           | 1/335   | 0.999471 | 0.999833 | 0 | 0 | 0.130514 | 6.90E-05 |
| GPCR downstream signaling Homo sapiens R-HSA-388396                          | 8/983   | 0.999833 | 0.999833 | 0 | 0 | 0.351327 | 5.88E-05 |
