# Supplementary material for: Evidence for mitochondrial Lonp1 expression in the nucleus
Source: PubMed Central journal article supplement (PMC9237102; doi:10.1038/s41598-022-14860-0), 2022-06-27
Supplement: 41598_2022_14860_MOESM5_ESM.pdf [file 41598_2022_14860_MOESM5_ESM.pdf]

**Supplementary Table 3**

| Ctrl siLonp1 vs siScramble                                         |      |       |       |           |           |            |             |
|--------------------------------------------------------------------|------|-------|-------|-----------|-----------|------------|-------------|
| NAME                                                               | SIZE | ES    | NES   | NOM p-val | FDR q-val | FWER p-val | RANK AT MAX |
| REACTOME_NUCLEAR_EVENTS_KINASE_AND_TRANSCRIPTION_FACTOR_ACTIVATION | 54   | 0.724 | 2.478 | 0.000     | 0.000     | 0          | 1692        |
| REACTOME_NGF_STIMULATED_TRANSCRIPTION                              | 33   | 0.780 | 2.386 | 0.000     | 0.000     | 0          | 1342        |
| REACTOME_ELASTIC_FIBRE_FORMATION                                   | 25   | 0.785 | 2.294 | 0.000     | 0.000     | 0          | 1534        |
| REACTOME_SIGNALING_BY_NTRKS                                        | 113  | 0.573 | 2.209 | 0.000     | 0.000     | 0          | 2902        |
| REACTOME_EXTRACELLULAR_MATRIX_ORGANIZATION                         | 164  | 0.539 | 2.170 | 0.000     | 0.000     | 0          | 1559        |
| REACTOME KERATINIZATION                                            | 38   | 0.664 | 2.130 | 0.000     | 0.000     | 0.001      | 1514        |
| REACTOME MOLECULES ASSOCIATED WITH ELASTIC FIBRES                  | 19   | 0.782 | 2.121 | 0.000     | 0.000     | 0.001      | 1534        |
| REACTOME CONSTITUTIVE SIGNALING BY ABERRANT PI3K IN CANCER         | 39   | 0.647 | 2.067 | 0.000     | 0.001     | 0.008      | 1477        |
| REACTOME ASSEMBLY AND CELL SURFACE PRESENTATION OF NMDA RECEPTORS  | 24   | 0.710 | 2.064 | 0.000     | 0.001     | 0.009      | 2396        |
| REACTOME FORMATION OF THE CORNIFIED ENVELOPE                       | 34   | 0.671 | 2.064 | 0.000     | 0.001     | 0.009      | 1020        |
| REACTOME SIGNALING BY RECEPTOR TYROSINE KINASES                    | 377  | 0.464 | 2.050 | 0.000     | 0.001     | 0.011      | 3113        |
| REACTOME MAPK TARGETS NUCLEAR EVENTS MEDIATED BY MAP KINASES       | 29   | 0.669 | 2.023 | 0.000     | 0.002     | 0.021      | 2240        |
| REACTOME SYNDECAN INTERACTIONS                                     | 18   | 0.757 | 2.015 | 0.000     | 0.002     | 0.025      | 1687        |
| REACTOME ROS AND RNS PRODUCTION IN PHAGOCYTES                      | 21   | 0.702 | 1.993 | 0.000     | 0.003     | 0.039      | 3038        |
| REACTOME PI3K AKT SIGNALING IN CANCER                              | 66   | 0.566 | 1.991 | 0.000     | 0.003     | 0.04       | 2102        |
| REACTOME CHONDROITIN SULFATE DERMATAN SULFATE METABOLISM           | 36   | 0.628 | 1.990 | 0.000     | 0.003     | 0.042      | 2333        |
| REACTOME NEGATIVE REGULATION OF THE PI3K AKT NETWORK               | 70   | 0.547 | 1.942 | 0.000     | 0.009     | 0.118      | 2742        |
| REACTOME FORMATION OF TUBULIN FOLDING INTERMEDIATES BY CCT TRIC    | 19   | 0.713 | 1.932 | 0.002     | 0.010     | 0.139      | 2113        |
| REACTOME DEGRADATION OF THE EXTRACELLULAR MATRIX                   | 70   | 0.540 | 1.924 | 0.000     | 0.011     | 0.162      | 1321        |
| REACTOME VOLTAGE GATED POTASSIUM CHANNELS                          | 12   | 0.772 | 1.921 | 0.002     | 0.011     | 0.168      | 1676        |

|                                                                                 |    |       |       |       |       |       |      |
|---------------------------------------------------------------------------------|----|-------|-------|-------|-------|-------|------|
| REACTOME_SIGNALING_BY_INSULIN_RECEPTOR                                          | 54 | 0.561 | 1.917 | 0.000 | 0.011 | 0.18  | 3038 |
| REACTOME_HEPARAN_SULFATE_HEPARIN_HS_GAG_METABOLISM                              | 34 | 0.613 | 1.912 | 0.003 | 0.011 | 0.19  | 1755 |
| REACTOME_GAP_JUNCTION_TRAFFICKING_AND_REGULATION                                | 31 | 0.629 | 1.911 | 0.000 | 0.011 | 0.19  | 2601 |
| REACTOME_ESTROGEN_DEPENDENT_NUCLEAR_EVENTS_DOWNSTREAM_OF_ESR_MEMBRANE_SIGNALING | 20 | 0.691 | 1.910 | 0.000 | 0.010 | 0.193 | 2042 |
| REACTOME_INTEGRIN_CELL_SURFACE_INTERACTIONS                                     | 45 | 0.574 | 1.906 | 0.000 | 0.010 | 0.201 | 1511 |
| REACTOME_ECM_PROTEOGLYCANS                                                      | 37 | 0.603 | 1.906 | 0.000 | 0.010 | 0.204 | 1511 |
| REACTOME_NEUREXINS_AND_NEUROLIGINS                                              | 34 | 0.613 | 1.900 | 0.000 | 0.010 | 0.215 | 2396 |
| REACTOME_COLLAGEN_DEGRADATION                                                   | 29 | 0.626 | 1.894 | 0.000 | 0.011 | 0.232 | 1250 |
| REACTOME_A_TETRASACCHARIDE_LINKER_SEQUENCE_IS_REQUIRED_FOR_GAG_SYNTHESIS        | 15 | 0.747 | 1.883 | 0.000 | 0.012 | 0.26  | 2333 |
| REACTOME_INSULIN_RECEPTOR_RECYCLING                                             | 21 | 0.676 | 1.872 | 0.002 | 0.015 | 0.316 | 3330 |
| REACTOME DISSOLUTION_OF_FIBRIN_CLOT                                             | 10 | 0.806 | 1.868 | 0.000 | 0.016 | 0.333 | 1236 |
| REACTOME_COLLAGEN_CHAIN_TRIMERIZATION                                           | 15 | 0.721 | 1.866 | 0.000 | 0.016 | 0.349 | 1250 |
| REACTOME_PLASMA_LIPOPROTEIN_ASSEMBLY                                            | 9  | 0.820 | 1.855 | 0.002 | 0.018 | 0.405 | 685  |
| REACTOME_RHO_GTPASES_ACTIVATION_CIT                                             | 18 | 0.675 | 1.855 | 0.002 | 0.018 | 0.411 | 2597 |
| REACTOME_GAP_JUNCTION_ASSEMBLY                                                  | 18 | 0.690 | 1.853 | 0.000 | 0.018 | 0.417 | 2209 |
| REACTOME_CELL_EXTRACELLULAR_MATRIX_INTERACTIONS                                 | 17 | 0.701 | 1.847 | 0.002 | 0.018 | 0.438 | 2601 |
| REACTOME_RAF_INDEPENDENT_MAPK1_3_ACTIVATION                                     | 22 | 0.658 | 1.843 | 0.002 | 0.020 | 0.465 | 3595 |
| REACTOME_DEFECTIVE_B4GALT7_CAUSES_EDS_PROGEROID_TYPE                            | 11 | 0.774 | 1.841 | 0.002 | 0.020 | 0.474 | 1541 |
| REACTOME_NON_INTEGRIN_MEMBRANE_ECM_INTERACTIONS                                 | 37 | 0.577 | 1.838 | 0.000 | 0.020 | 0.489 | 1687 |
| REACTOME_RECYCLING_PATHWAY_OF_L1                                                | 39 | 0.573 | 1.829 | 0.002 | 0.022 | 0.53  | 1399 |
| REACTOME_CHONDROITIN_SULFATE_BIOSYNTHESIS                                       | 13 | 0.753 | 1.828 | 0.002 | 0.022 | 0.538 | 1917 |
| REACTOME_SHC1_EVENTS_IN_EGFR_SIGNALING                                          | 10 | 0.794 | 1.825 | 0.002 | 0.022 | 0.556 | 770  |
| REACTOME_TGF_BETA_RECEPTOR_SIGNALING_ACTIVATES_SMAPS                            | 32 | 0.588 | 1.823 | 0.000 | 0.022 | 0.567 | 2290 |

|                                                                             |     |       |       |       |       |       |      |
|-----------------------------------------------------------------------------|-----|-------|-------|-------|-------|-------|------|
| REACTOME_RESPONSE_TO_METAL_IONS                                             | 10  | 0.776 | 1.810 | 0.002 | 0.026 | 0.626 | 1747 |
| REACTOME_COLLAGEN_FORMATION                                                 | 50  | 0.532 | 1.808 | 0.000 | 0.026 | 0.635 | 1817 |
| REACTOME_INTERLEUKIN_6_FAMILY_SIGNALING                                     | 14  | 0.707 | 1.806 | 0.003 | 0.026 | 0.645 | 787  |
| REACTOME_NEGATIVE_REGULATION_OF_MAPK_PATHWAY                                | 42  | 0.551 | 1.801 | 0.000 | 0.028 | 0.671 | 3513 |
| REACTOME_YAP1_AND_WWTR1_TAZ_STIMULATED_GENE_EXPRESSION                      | 12  | 0.747 | 1.801 | 0.004 | 0.027 | 0.671 | 2313 |
| REACTOME_SIGNALING_BY_INTERLEUKINS                                          | 302 | 0.417 | 1.800 | 0.000 | 0.027 | 0.677 | 1692 |
| REACTOME_CHEMOKINE_RECEPTORS_BIND_CHEMOKINES                                | 10  | 0.780 | 1.800 | 0.002 | 0.026 | 0.681 | 899  |
| REACTOME_INTERLEUKIN_17_SIGNALING                                           | 65  | 0.507 | 1.799 | 0.000 | 0.026 | 0.681 | 2920 |
| REACTOME_BASIGIN_INTERACTIONS                                               | 19  | 0.659 | 1.795 | 0.002 | 0.027 | 0.704 | 2929 |
| REACTOME_TRANSPORT_OF_CONNEXONS_TO_THE_PLASMA_MEMBRANE                      | 12  | 0.750 | 1.794 | 0.002 | 0.027 | 0.705 | 1399 |
| REACTOME_WNT_LIGAND_BIOGENESIS_AND_TRAFFICKING                              | 13  | 0.712 | 1.790 | 0.006 | 0.028 | 0.72  | 1887 |
| REACTOME_ACTIVATION_OF_NMDA_RECEPTORS_AND_POSTSYNAPTIC_EVENTS               | 63  | 0.501 | 1.786 | 0.000 | 0.029 | 0.74  | 2419 |
| REACTOME_PARASITE_INFECTIO<br>N                                             | 48  | 0.533 | 1.785 | 0.000 | 0.029 | 0.747 | 3175 |
| REACTOME_FLT3_SIGNALING                                                     | 217 | 0.424 | 1.783 | 0.000 | 0.029 | 0.754 | 2029 |
| REACTOME_COLLAGEN_BIOSYNTHESIS_AND_MODIFYING_ENZYMES                        | 33  | 0.572 | 1.779 | 0.003 | 0.030 | 0.775 | 1250 |
| REACTOME_MAPK_FAMILY_SIGNALING_CASCADES                                     | 245 | 0.420 | 1.775 | 0.000 | 0.031 | 0.788 | 3074 |
| REACTOME_COOPERATION_OF_PREFOLDIN_AND_TRIC_CCT_IN_ACTIN_AND_TUBULIN_FOLDING | 26  | 0.607 | 1.774 | 0.000 | 0.031 | 0.79  | 2753 |
| REACTOME_SEALING_OF_THE_NUCLEAR_ENVELOPE_NE_BY_ESCRT_III                    | 24  | 0.625 | 1.774 | 0.003 | 0.031 | 0.792 | 2949 |
| REACTOME_NEURONAL_SYSTEM                                                    | 196 | 0.431 | 1.773 | 0.000 | 0.030 | 0.795 | 2466 |
| REACTOME_ASSEMBLY_OF_COLLAGEN_FIBRILS_AND_OTHER_MULTIMERIC_STRUCTURES       | 32  | 0.572 | 1.772 | 0.003 | 0.031 | 0.803 | 1530 |
| REACTOME_HEMOSTASIS                                                         | 385 | 0.398 | 1.765 | 0.000 | 0.033 | 0.827 | 2447 |
| REACTOME_EPHRIN_SIGNALING                                                   | 17  | 0.661 | 1.760 | 0.002 | 0.035 | 0.843 | 3298 |
| REACTOME_DOWNREGULATION_OF_TGF_BETA_RECEPTOR_SIGNALING                      | 26  | 0.598 | 1.759 | 0.003 | 0.035 | 0.845 | 2290 |

|                                                                                                                                  |     |       |       |       |       |       |      |
|----------------------------------------------------------------------------------------------------------------------------------|-----|-------|-------|-------|-------|-------|------|
| REACTOME_FOXO_MEDIATED_TRANSCRIPTION_OF_CELL_CYCLE_GENES                                                                         | 16  | 0.660 | 1.756 | 0.004 | 0.036 | 0.858 | 1367 |
| REACTOME_HS_GAG_BIOSYNTHESIS                                                                                                     | 18  | 0.652 | 1.747 | 0.004 | 0.039 | 0.887 | 1755 |
| REACTOME_RHO_GTPASES_ACTIVATE_WASPS_AND_WAVES                                                                                    | 33  | 0.572 | 1.742 | 0.002 | 0.041 | 0.9   | 3175 |
| REACTOME_PROTEIN_PROTEIN_INTERACTIONS_AT_SYNAPSES                                                                                | 50  | 0.518 | 1.741 | 0.002 | 0.041 | 0.905 | 2674 |
| REACTOME_INTERLEUKIN_4_AND_INTERLEUKIN_13_SIGNALING                                                                              | 62  | 0.503 | 1.741 | 0.002 | 0.041 | 0.906 | 2163 |
| REACTOME_GLYCOSAMINOGLYCAN_METABOLISM                                                                                            | 85  | 0.475 | 1.739 | 0.003 | 0.041 | 0.909 | 1917 |
| REACTOME_CELL_SURFACE_INTERACTIONS_AT_THE_VASCULAR_WALL                                                                          | 75  | 0.475 | 1.735 | 0.000 | 0.043 | 0.924 | 1732 |
| REACTOME_RHO_GTPASES_ACTIVATE_IQGAPS                                                                                             | 23  | 0.602 | 1.726 | 0.000 | 0.047 | 0.942 | 3589 |
| REACTOME_METALLOTHIONEIN_S_BIND_METALS                                                                                           | 8   | 0.784 | 1.725 | 0.004 | 0.047 | 0.942 | 1747 |
| REACTOME_GPCR_LIGAND_BINDING                                                                                                     | 106 | 0.450 | 1.724 | 0.000 | 0.047 | 0.944 | 1669 |
| REACTOME_MUSCLE_CONTRACTION                                                                                                      | 99  | 0.460 | 1.724 | 0.000 | 0.047 | 0.946 | 2076 |
| REACTOME_LOSS_OF_FUNCTION_OF_SMAD2_3_IN_CANCER                                                                                   | 7   | 0.820 | 1.723 | 0.000 | 0.047 | 0.948 | 2290 |
| REACTOME_IL_6_TYPE_CYTOKINE_RECEPTOR_LIGAND_INTERACTIONS                                                                         | 8   | 0.800 | 1.722 | 0.007 | 0.046 | 0.95  | 787  |
| REACTOME_ERK_MAPK_TARGETS                                                                                                        | 21  | 0.612 | 1.716 | 0.005 | 0.049 | 0.966 | 2240 |
| REACTOME_TOLL_LIKE_RECEPTOR_TLR1_TLR2_CASCADE                                                                                    | 82  | 0.458 | 1.715 | 0.000 | 0.049 | 0.971 | 2920 |
| REACTOME_NEGATIVE_REGULATION_OF_TCF_DEPENDENT_SIGNALING_BY_WNT_LIGAND_ANTAGONISTS                                                | 5   | 0.906 | 1.713 | 0.002 | 0.049 | 0.972 | 734  |
| REACTOME_REGULATION_OF_INSULIN_LIKE_GROWTH_FACTOR_IGF_TRANSPORT_AND_UPTAKE_BY_INSULIN_LIKE_GROWTH_FACTOR_BINDING_PROTEINS_IGFBPS | 65  | 0.483 | 1.710 | 0.003 | 0.051 | 0.975 | 2600 |
| REACTOME_SIGNAL_TRANSDUCTION_BY_L1                                                                                               | 17  | 0.652 | 1.708 | 0.004 | 0.051 | 0.977 | 3513 |
| REACTOME_PLASMA_LIPOPROTEIN_REMODELING                                                                                           | 15  | 0.664 | 1.700 | 0.010 | 0.055 | 0.981 | 1539 |
| REACTOME_POST_CHAPERONIN_TUBULIN_FOLDING_PATHWAY                                                                                 | 17  | 0.643 | 1.698 | 0.008 | 0.055 | 0.981 | 1399 |
| REACTOME_INTEGRIN_SIGNALING                                                                                                      | 21  | 0.594 | 1.696 | 0.013 | 0.056 | 0.982 | 2395 |
| REACTOME_GROWTH_HORMONE_RECEPTOR_SIGNALING                                                                                       | 19  | 0.619 | 1.694 | 0.009 | 0.057 | 0.984 | 399  |

|                                                                                           |     |       |       |       |       |       |      |
|-------------------------------------------------------------------------------------------|-----|-------|-------|-------|-------|-------|------|
| REACTOME_STRIATED_MUSCLE_CONTRACTION                                                      | 15  | 0.658 | 1.694 | 0.007 | 0.057 | 0.984 | 1569 |
| REACTOME_SIGNALING_BY_TGF_BETA_RECEPTOR_COMPLEX_IN_CANCER                                 | 8   | 0.784 | 1.693 | 0.006 | 0.056 | 0.986 | 2290 |
| REACTOME_RESPONSE_TO_ELEVATED_PLATELET_CYTOSOLIC_C_A2_                                    | 85  | 0.454 | 1.682 | 0.000 | 0.063 | 0.992 | 2704 |
| REACTOME_DISEASES_OF_SIGNAL_TRANSDUCTION_BY_GROWTH_FACTOR_RECEPTORS_AND_SECOND_MESSENGERS | 329 | 0.383 | 1.681 | 0.000 | 0.063 | 0.992 | 2607 |
| REACTOME_SIGNALING_BY_PDGF                                                                | 40  | 0.528 | 1.681 | 0.004 | 0.063 | 0.992 | 1707 |
| REACTOME_TYPE_I_HEMIDESMOSOME_ASSEMBLY                                                    | 9   | 0.747 | 1.678 | 0.011 | 0.064 | 0.993 | 1817 |
| REACTOME_MISSPLICED_LRP5_MUTANTS_HAVE_ENHANCED_BETA_CATENIN_DEPENDENT_SIGNALING           | 4   | 0.936 | 1.675 | 0.004 | 0.065 | 0.993 | 734  |
| REACTOME_PLATELET_ACTIVATION_SIGNALING_AND_AGGREGATION                                    | 167 | 0.416 | 1.675 | 0.000 | 0.065 | 0.993 | 3235 |
| REACTOME_PLASMA_LIPOPROTEIN_ASSEMBLY_REMODELING_AND_CLEARANCE                             | 47  | 0.501 | 1.673 | 0.000 | 0.065 | 0.995 | 1539 |
| REACTOME_P130CAS_LINKAGE_TO_MAPK_SIGNALING_FOR_INTEGRINS                                  | 11  | 0.710 | 1.670 | 0.013 | 0.066 | 0.996 | 998  |
| REACTOME_ER_TO_GOLGI_ANTEROGRADE_TRANSPORT                                                | 139 | 0.421 | 1.669 | 0.001 | 0.067 | 0.996 | 3709 |
| REACTOME_FOXO_MEDIATED_TRANSCRIPTION_OF_OXIDATIVE_STRESS_METABOLIC_AND_NEURONAL_GENES     | 20  | 0.595 | 1.665 | 0.016 | 0.069 | 0.996 | 1765 |
| REACTOME_CLASS_A_1_RHODOPSIN_LIKE_RECEPTORS                                               | 65  | 0.463 | 1.662 | 0.002 | 0.071 | 0.997 | 1669 |
| REACTOME_GENERATION_OF_SECOND_MESSENGER_MOLECULES                                         | 13  | 0.673 | 1.659 | 0.017 | 0.072 | 0.997 | 1355 |
| REACTOME_TRANSLOCATION_OF_SLC2A4_Glut4_TO_THE_PLASMA_MEMBRANE                             | 63  | 0.472 | 1.657 | 0.007 | 0.073 | 0.997 | 3523 |
| REACTOME_ACTIVATION_OF_BAD_AND_TRANSLOCATION_TO_MITOCHONDRIA                              | 15  | 0.637 | 1.656 | 0.026 | 0.073 | 0.998 | 3484 |
| REACTOME_RUNX2_REGULATES_BONE_DEVELOPMENT                                                 | 23  | 0.571 | 1.652 | 0.010 | 0.075 | 0.998 | 3195 |
| REACTOME_O_GLYCOSYLATION_OF_TSR_DOMAIN_CONTAINING_PROTEINS                                | 20  | 0.601 | 1.651 | 0.019 | 0.075 | 0.998 | 640  |
| REACTOME_CREB_PHOSPHORYLATION                                                             | 7   | 0.783 | 1.647 | 0.022 | 0.079 | 0.998 | 1267 |

|                                                                         |     |       |       |       |       |       |      |
|-------------------------------------------------------------------------|-----|-------|-------|-------|-------|-------|------|
| REACTOME_SIGNALING_BY_LEP<br>TIN                                        | 10  | 0.708 | 1.644 | 0.025 | 0.080 | 0.999 | 255  |
| REACTOME_GAB1_SIGNALOSO<br>ME                                           | 12  | 0.694 | 1.640 | 0.020 | 0.083 | 0.999 | 1406 |
| REACTOME_CELL_CELL_COMMU<br>NICATION                                    | 84  | 0.441 | 1.640 | 0.003 | 0.082 | 0.999 | 1817 |
| REACTOME_TOLL_LIKE_RECEPT<br>OR_10_TLR10_CASCADE                        | 77  | 0.460 | 1.635 | 0.003 | 0.086 | 0.999 | 2920 |
| REACTOME_COPI_MEDIATED_A<br>NTEROGRADE_TRANSPORT                        | 88  | 0.437 | 1.633 | 0.003 | 0.087 | 1     | 3276 |
| REACTOME_PEPTIDE_LIGAND_BI<br>NDING_RECEPTORS                           | 37  | 0.513 | 1.632 | 0.015 | 0.087 | 1     | 2379 |
| REACTOME_DEFECTIVE_EXT2_C<br>AUSES_EXOSTOSES_2                          | 10  | 0.722 | 1.630 | 0.027 | 0.089 | 1     | 1511 |
| REACTOME_ACTIVATION_OF_TH<br>E_AP_1_FAMILY_OF_TRANSCRIP<br>TION_FACTORS | 9   | 0.746 | 1.629 | 0.018 | 0.088 | 1     | 2887 |
| REACTOME_TOLL_LIKE_RECEPT<br>OR_9_TLR9_CASCADE                          | 85  | 0.441 | 1.623 | 0.005 | 0.093 | 1     | 2920 |
| REACTOME_FCERI_MEDIATED_<br>MAPK_ACTIVATION                             | 25  | 0.549 | 1.622 | 0.016 | 0.094 | 1     | 3335 |
| REACTOME_EGFR_DOWNREGUL<br>ATION                                        | 25  | 0.558 | 1.619 | 0.012 | 0.095 | 1     | 3855 |
| REACTOME_PLATELET_AGGREG<br>ATION_PLUG_FORMATION_                       | 24  | 0.556 | 1.618 | 0.015 | 0.096 | 1     | 2395 |
| REACTOME_SIGNALING_BY_MA<br>PK_MUTANTS                                  | 7   | 0.768 | 1.615 | 0.017 | 0.098 | 1     | 2887 |
| REACTOME_CARDIAC_CONDUCT<br>ION                                         | 65  | 0.461 | 1.614 | 0.002 | 0.098 | 1     | 2076 |
| REACTOME_TRANSFERRIN_END<br>OCYTOSIS_AND_RECYCLING                      | 26  | 0.554 | 1.614 | 0.019 | 0.097 | 1     | 3330 |
| REACTOME_SIGNAL_ATTENUATI<br>ON                                         | 9   | 0.719 | 1.614 | 0.015 | 0.097 | 1     | 770  |
| REACTOME_P75NTR_NEGATIVEL<br>Y_REGULATES_CELL_CYCLE_VIA_<br>SC1         | 5   | 0.841 | 1.612 | 0.008 | 0.097 | 1     | 4    |
| REACTOME_CHYLOMICRON_ASS<br>SEMBLY                                      | 3   | 0.967 | 1.609 | 0.000 | 0.100 | 1     | 112  |
| REACTOME_SIGNALING_BY_WN<br>T_IN_CANCER                                 | 30  | 0.534 | 1.607 | 0.005 | 0.101 | 1     | 2549 |
| REACTOME_NERVOUS_SYSTEM_<br>DEVELOPMENT                                 | 448 | 0.360 | 1.606 | 0.000 | 0.101 | 1     | 2159 |
| REACTOME_EGFR_INTERACTS_<br>WITH_PHOSPHOLIPASE_C_GAM<br>MA              | 5   | 0.859 | 1.606 | 0.014 | 0.101 | 1     | 750  |
| REACTOME_NEUTROPHIL_DEGR<br>ANULATION                                   | 342 | 0.364 | 1.603 | 0.000 | 0.102 | 1     | 3019 |
| REACTOME_TOLL_LIKE_RECEPT<br>OR_4_TLR4_CASCADE                          | 106 | 0.412 | 1.600 | 0.000 | 0.105 | 1     | 3122 |
| REACTOME_CTLA4_INHIBITORY_<br>SIGNALING                                 | 18  | 0.595 | 1.600 | 0.024 | 0.104 | 1     | 3080 |

|                                                                                           |     |       |       |       |       |   |      |
|-------------------------------------------------------------------------------------------|-----|-------|-------|-------|-------|---|------|
| REACTOME_COPI_INDEPENDENT_GOLGI_TO_ER_RETROGRADE_TRAFFIC                                  | 41  | 0.496 | 1.599 | 0.010 | 0.104 | 1 | 2113 |
| REACTOME_INSULIN_RECEPTOR_SIGNALING_CASCADE                                               | 34  | 0.520 | 1.598 | 0.015 | 0.104 | 1 | 3012 |
| REACTOME_CELL_JUNCTION_ORGANIZATION                                                       | 59  | 0.466 | 1.598 | 0.005 | 0.104 | 1 | 1817 |
| REACTOME_GASTRIN_CREB_SIGNALING_PATHWAY_VIA_PKC_AND_MAPK                                  | 14  | 0.630 | 1.597 | 0.020 | 0.104 | 1 | 716  |
| REACTOME_SIGNALING_BY_FGF_R1                                                              | 33  | 0.520 | 1.597 | 0.012 | 0.104 | 1 | 2887 |
| REACTOME_REGULATION_OF_LOCALIZATION_OF_FOXO_TRANSCRIPTION_FACTORS                         | 12  | 0.662 | 1.594 | 0.023 | 0.105 | 1 | 4003 |
| REACTOME_RHO_GTPASES_ACTIVATES_ROCKS                                                      | 18  | 0.598 | 1.586 | 0.025 | 0.114 | 1 | 3499 |
| REACTOME_TRANSCRIPTIONAL_REGULATION_BY_THE_AP_2_FAMILY_OF_TRANSCRIPTION_FACTORS           | 28  | 0.539 | 1.585 | 0.019 | 0.114 | 1 | 750  |
| REACTOME_SHC_MEDIATED_CASCADE_FGFR4                                                       | 10  | 0.674 | 1.584 | 0.024 | 0.114 | 1 | 1208 |
| REACTOME_INTERLEUKIN_7_SIGNALING                                                          | 16  | 0.609 | 1.584 | 0.024 | 0.113 | 1 | 255  |
| REACTOME_INTERLEUKIN_10_SIGNALING                                                         | 18  | 0.597 | 1.582 | 0.022 | 0.114 | 1 | 763  |
| REACTOME_NCAM_SIGNALING_FOR_NEURITE_OUTGROWTH                                             | 34  | 0.506 | 1.582 | 0.019 | 0.113 | 1 | 2967 |
| REACTOME_CREB1_PHOSPHORYLATION_THROUGH_NMDA_RECEPTOR_MEDIATED_ACTIVATION_OF_RAS_SIGNALING | 22  | 0.553 | 1.582 | 0.009 | 0.113 | 1 | 2887 |
| REACTOME_MYD88_INDEPENDENT_TLR4_CASCADE                                                   | 90  | 0.418 | 1.580 | 0.006 | 0.114 | 1 | 3122 |
| REACTOME_SIGNALING_BY_VEGF                                                                | 86  | 0.420 | 1.580 | 0.008 | 0.113 | 1 | 3192 |
| REACTOME_FOXO_MEDIATED_TRANSCRIPTION                                                      | 55  | 0.454 | 1.576 | 0.015 | 0.117 | 1 | 3199 |
| REACTOME_CARGO_CONCENTRATION_IN_THE_ER                                                    | 31  | 0.515 | 1.575 | 0.016 | 0.117 | 1 | 2028 |
| REACTOME_EXTRA_NUCLEAR_ESTROGEN_SIGNALING                                                 | 52  | 0.472 | 1.575 | 0.007 | 0.117 | 1 | 2053 |
| REACTOME_DOWNREGULATION_OF_SMAD2_3_SMAD4_TRANSCRIPTIONAL_ACTIVITY                         | 23  | 0.549 | 1.574 | 0.029 | 0.117 | 1 | 3842 |
| REACTOME_SIGNALING_BY_MST1                                                                | 5   | 0.817 | 1.573 | 0.020 | 0.117 | 1 | 1708 |
| REACTOME_TRAFFICKING_OF_AMPAR_RECEPTORS                                                   | 18  | 0.591 | 1.573 | 0.027 | 0.116 | 1 | 2466 |
| REACTOME_ION_CHANNEL_TRANSPORT                                                            | 111 | 0.409 | 1.573 | 0.003 | 0.116 | 1 | 3082 |

|                                                                          |     |       |       |       |       |   |      |
|--------------------------------------------------------------------------|-----|-------|-------|-------|-------|---|------|
| REACTOME_REVERSIBLE_HYDRATION_OF_CARBOXYLIC_ACID_DERIVATIVES             | 7   | 0.755 | 1.572 | 0.020 | 0.116 | 1 | 2318 |
| REACTOME_COSTIMULATION_BY_THE_CD28_FAMILY                                | 44  | 0.471 | 1.570 | 0.020 | 0.117 | 1 | 3235 |
| REACTOME_SEMAPHORIN_INTERACTIONS                                         | 51  | 0.460 | 1.567 | 0.015 | 0.120 | 1 | 1745 |
| REACTOME_GRB2_SOS_PROVIDES_LINKAGE_TO_MAPK_SIGNALING_FOR_INTEGRINS       | 11  | 0.644 | 1.567 | 0.036 | 0.119 | 1 | 2029 |
| REACTOME_SIGNALING_TO_ERKS                                               | 30  | 0.513 | 1.567 | 0.027 | 0.119 | 1 | 3687 |
| REACTOME_RAB_GERANYLGERANYLATION                                         | 48  | 0.466 | 1.563 | 0.012 | 0.122 | 1 | 3851 |
| REACTOME_REGULATION_OF_GENE_EXPRESSION_BY_HYPOXIA_INDUCIBLE_FACTOR       | 9   | 0.701 | 1.562 | 0.029 | 0.122 | 1 | 1852 |
| REACTOME_RUNX3_REGULATES_CDKN1A_TRANSCRIPTION                            | 7   | 0.772 | 1.562 | 0.030 | 0.122 | 1 | 2084 |
| REACTOME_HDL_REMODELING                                                  | 4   | 0.879 | 1.561 | 0.014 | 0.122 | 1 | 1539 |
| REACTOME_RET_SIGNALING                                                   | 29  | 0.519 | 1.560 | 0.016 | 0.122 | 1 | 1470 |
| REACTOME_PHYSIOLOGICAL_FACTORS                                           | 7   | 0.738 | 1.559 | 0.037 | 0.122 | 1 | 2076 |
| REACTOME_NEUROTRANSMITTER_RECEPTORS_AND_POSTSYNAPTIC_SIGNAL_TRANSMISSION | 109 | 0.407 | 1.558 | 0.002 | 0.123 | 1 | 2466 |
| REACTOME_TRANSPORT_TO_THE_GOLGI_AND_SUBSEQUENT_MODIFICATION              | 159 | 0.384 | 1.556 | 0.000 | 0.124 | 1 | 3709 |
| REACTOME_CD163_MEDIATING_AN_ANTI_INFLAMMATORY_RESPONSE                   | 7   | 0.742 | 1.553 | 0.019 | 0.127 | 1 | 2962 |
| REACTOME_UPTAKE_AND_ACTIONS_OF_BACTERIAL_TOXINS                          | 23  | 0.531 | 1.552 | 0.026 | 0.128 | 1 | 4224 |
| REACTOME_CLATHRIN_MEDIATED_ENDOCYTOSIS                                   | 116 | 0.403 | 1.551 | 0.002 | 0.127 | 1 | 4123 |
| REACTOME_ACTIVATION_OF_AMPK_DOWNSTREAM_OF_NMDARS                         | 20  | 0.566 | 1.551 | 0.019 | 0.127 | 1 | 1399 |
| REACTOME_SEMA4D_IN_SEMAPHORIN_SIGNALING                                  | 23  | 0.551 | 1.551 | 0.032 | 0.127 | 1 | 3574 |
| REACTOME_SIGNALING_BY_TGF_B_FAMILY_MEMBERS                               | 86  | 0.418 | 1.550 | 0.008 | 0.126 | 1 | 3842 |
| REACTOME_INFECTION_WITH_MYCOBACTERIUM_TUBERCULOSIS                       | 23  | 0.541 | 1.548 | 0.030 | 0.128 | 1 | 3275 |
| REACTOME_DISEASES_ASSOCIATED_WITH_GLYCOSAMINOGLYCAN_METABOLISM           | 27  | 0.516 | 1.544 | 0.024 | 0.132 | 1 | 1541 |
| REACTOME_SIGNALING_BY_TGF_BETA_RECEPTOR_COMPLEX                          | 72  | 0.434 | 1.543 | 0.013 | 0.132 | 1 | 3842 |
| REACTOME_FGFR2_MUTANT_RECEPTOR_ACTIVATION                                | 19  | 0.562 | 1.540 | 0.030 | 0.135 | 1 | 2715 |

|                                                                                          |     |       |       |       |       |   |      |
|------------------------------------------------------------------------------------------|-----|-------|-------|-------|-------|---|------|
| REACTOME_GPVI_MEDIATED_ACTIVATION_CASCADE                                                | 24  | 0.521 | 1.539 | 0.021 | 0.135 | 1 | 3235 |
| REACTOME_HS_GAG_DEGRADATION                                                              | 17  | 0.586 | 1.539 | 0.030 | 0.135 | 1 | 1511 |
| REACTOME_MET_RECEPTOR_ACTIVATION                                                         | 4   | 0.866 | 1.539 | 0.014 | 0.135 | 1 | 1708 |
| REACTOME_SYNAPTIC_ADHESION_LIKE_MOLECULES                                                | 14  | 0.603 | 1.538 | 0.040 | 0.135 | 1 | 2639 |
| REACTOME_DISEASES_OF_GLYCOSYLATION                                                       | 97  | 0.409 | 1.537 | 0.009 | 0.136 | 1 | 1541 |
| REACTOME_INTERLEUKIN_6_SIGNALING                                                         | 10  | 0.656 | 1.534 | 0.048 | 0.138 | 1 | 3168 |
| REACTOME_NEGATIVE_REGULATION_OF_FGFR4_SIGNALING                                          | 21  | 0.549 | 1.534 | 0.026 | 0.137 | 1 | 2887 |
| REACTOME_SIGNALING_BY_EGFR_IN_CANCER                                                     | 20  | 0.550 | 1.534 | 0.043 | 0.137 | 1 | 770  |
| REACTOME_SIGNALING_BY_PTK6                                                               | 42  | 0.478 | 1.534 | 0.015 | 0.136 | 1 | 2804 |
| REACTOME_SHC_MEDIATED_CASCADE_FGFR3                                                      | 9   | 0.680 | 1.534 | 0.039 | 0.136 | 1 | 1208 |
| REACTOME_RESPONSE_OF_MTB_TO_PHAGOCYTOSIS                                                 | 21  | 0.554 | 1.533 | 0.041 | 0.136 | 1 | 3275 |
| REACTOME_SIGNALING_BY_GPCR                                                               | 314 | 0.351 | 1.530 | 0.000 | 0.138 | 1 | 1725 |
| REACTOME_MAP2K_AND_MAPK_ACTIVATION                                                       | 35  | 0.478 | 1.530 | 0.035 | 0.137 | 1 | 3589 |
| REACTOME_OLFACTORY_SIGNALING_PATHWAY                                                     | 8   | 0.712 | 1.530 | 0.031 | 0.137 | 1 | 308  |
| REACTOME_FORMATION_OF_FIBRIN_CLOT_CLOTTING_CASCADE                                       | 18  | 0.565 | 1.528 | 0.054 | 0.139 | 1 | 301  |
| REACTOME_ION_TRANSPORT_BY_P_TYPE_ATPASES                                                 | 36  | 0.484 | 1.527 | 0.040 | 0.140 | 1 | 1306 |
| REACTOME_IONOTROPIC_ACTIVITY_OF_KAINATE_RECEPTORS                                        | 6   | 0.771 | 1.526 | 0.025 | 0.140 | 1 | 2305 |
| REACTOME_NEGATIVE_REGULATION_OF_FGFR2_SIGNALING                                          | 20  | 0.550 | 1.522 | 0.050 | 0.144 | 1 | 2887 |
| REACTOME_FGFR3B_LIGAND_BINDING_AND_ACTIVATION                                            | 3   | 0.905 | 1.518 | 0.020 | 0.149 | 1 | 1208 |
| REACTOME_CD28_DEPENDENT_VAV1_PATHWAY                                                     | 8   | 0.693 | 1.517 | 0.035 | 0.150 | 1 | 3687 |
| REACTOME_TFAP2_AP_2_FAMILY_REGULATES_TRANSCRIPTION_OF_GROWTH_FACTORS_AND_THEIR_RECEPTORS | 7   | 0.728 | 1.513 | 0.048 | 0.153 | 1 | 750  |
| REACTOME_FGFR1_MODULATION_OF_FGFR1_SIGNALING                                             | 5   | 0.786 | 1.510 | 0.028 | 0.156 | 1 | 1108 |
| REACTOME_ACETYLCHOLINE_BINDING_AND_DOWNSTREAM_EVENTS                                     | 5   | 0.799 | 1.508 | 0.030 | 0.159 | 1 | 236  |
| REACTOME_AKT_PHOSPHORYLATED_TARGETS_IN_THE_NUCLEUS                                       | 10  | 0.664 | 1.508 | 0.053 | 0.158 | 1 | 714  |

|                                                                                   |     |       |       |       |       |   |      |
|-----------------------------------------------------------------------------------|-----|-------|-------|-------|-------|---|------|
| REACTOME_METABOLISM_OF_CARBOHYDRATES                                              | 221 | 0.357 | 1.508 | 0.000 | 0.157 | 1 | 2265 |
| REACTOME_NEGATIVE_REGULATION_OF_FGFR3_SIGNALING                                   | 20  | 0.553 | 1.506 | 0.036 | 0.158 | 1 | 2887 |
| REACTOME_PRESYNAPTIC_DEPOLARIZATION_AND_CALCIUM_CHANNEL_OPENING                   | 4   | 0.836 | 1.504 | 0.022 | 0.160 | 1 | 210  |
| REACTOME_ESR_MEDIATED_SIGNALING                                                   | 142 | 0.375 | 1.503 | 0.003 | 0.161 | 1 | 2057 |
| REACTOME_DEFECTS_OF_CONTACT_ACTIVATION_SYSTEM_CAS_AND_KALLIKREIN_KININ_SYSTEM_KKS | 8   | 0.697 | 1.502 | 0.055 | 0.161 | 1 | 892  |
| REACTOME_TRANSMISSION_ACROSS_CHEMICAL_SYNAPSES                                    | 139 | 0.377 | 1.498 | 0.006 | 0.165 | 1 | 2466 |
| REACTOME_PECAM1_INTERACTIONS                                                      | 10  | 0.647 | 1.498 | 0.059 | 0.165 | 1 | 782  |
| REACTOME_POTASSIUM_CHANNELS                                                       | 33  | 0.494 | 1.496 | 0.024 | 0.166 | 1 | 1819 |
| REACTOME_RUNX2_REGULATES_OSTEOBLAST_DIFFERENTIATION                               | 18  | 0.555 | 1.494 | 0.047 | 0.169 | 1 | 3195 |
| REACTOME_DISEASES_ASSOCIATED_WITH_OGLYCOSYLATION_OF_PROTEINS                      | 36  | 0.475 | 1.491 | 0.043 | 0.171 | 1 | 1369 |
| REACTOME_COPI_DEPENDENT_GOLGI_TO_ER_RETROGRADE_TRAFFIC                            | 88  | 0.401 | 1.491 | 0.014 | 0.171 | 1 | 2894 |
| REACTOME_CASPASE_ACTIVATION_VIA_DEPENDENCE_RECEPTORS_IN_THE_ABSENCE_OF_LIGAND     | 7   | 0.713 | 1.491 | 0.043 | 0.171 | 1 | 464  |
| REACTOME_COPII_MEDIATED_VESICLE_TRANSPORT                                         | 66  | 0.423 | 1.490 | 0.017 | 0.170 | 1 | 3709 |
| REACTOME_ERYTHROPOIETIN_ACTIVATES_RAS                                             | 13  | 0.596 | 1.487 | 0.048 | 0.175 | 1 | 770  |
| REACTOME_LGI_ADAM_INTERACTIONS                                                    | 6   | 0.756 | 1.484 | 0.039 | 0.178 | 1 | 210  |
| REACTOME_TFAP2_AP_2_FAMILY_REGULATES_TRANSCRIPTION_OF_CELL_CYCLE_FACTORS          | 5   | 0.774 | 1.483 | 0.055 | 0.178 | 1 | 1978 |
| REACTOME_IRON_UPTAKE_AND_TRANSPORT                                                | 47  | 0.451 | 1.483 | 0.023 | 0.177 | 1 | 3330 |
| REACTOME_TP53_REGULATES_TRANSCRIPTION_OF_GENES_INVOLVED_IN_CYTOCHROME_C_RELEASE   | 18  | 0.549 | 1.480 | 0.041 | 0.181 | 1 | 704  |
| REACTOME_CATION_COUPLED_CHLORIDE_COTRANSPORTERS                                   | 4   | 0.839 | 1.479 | 0.049 | 0.182 | 1 | 1126 |
| REACTOME_NEGATIVE_REGULATION_OF_FGFR1_SIGNALING                                   | 20  | 0.539 | 1.477 | 0.043 | 0.183 | 1 | 2887 |

|                                                                                              |     |       |       |       |       |   |      |
|----------------------------------------------------------------------------------------------|-----|-------|-------|-------|-------|---|------|
| REACTOME_RUNX3_REGULATES_YAP1_MEDIATED_TRANSCRIPTION                                         | 8   | 0.673 | 1.477 | 0.062 | 0.182 | 1 | 2313 |
| REACTOME_DEFECTIVE_CHST14_CAUSES_EDS_MUSCULOCONTRACTURAL_TYPE                                | 3   | 0.879 | 1.477 | 0.033 | 0.182 | 1 | 1541 |
| REACTOME_EXTRINSIC_PATHWAY_OF_FIBRIN_CLOT_FORMATION                                          | 4   | 0.823 | 1.476 | 0.046 | 0.183 | 1 | 301  |
| REACTOME_SIGNALING_BY_FGF_R                                                                  | 65  | 0.422 | 1.473 | 0.031 | 0.186 | 1 | 3842 |
| REACTOME_LISTERIA_MONOCYTOGENES_ENTRY_INTO_HOST_CELLS                                        | 18  | 0.550 | 1.473 | 0.061 | 0.186 | 1 | 3855 |
| REACTOME_P75NTR_REGULATES_AXONOGENESIS                                                       | 5   | 0.768 | 1.472 | 0.056 | 0.186 | 1 | 1327 |
| REACTOME_ERKS_ARE_INACTIVATED                                                                | 13  | 0.587 | 1.471 | 0.085 | 0.186 | 1 | 2887 |
| REACTOME_EPH_EPHRIN_SIGNALING                                                                | 79  | 0.400 | 1.470 | 0.014 | 0.186 | 1 | 3499 |
| REACTOME_INTERLEUKIN_2_FAMILY_SIGNALING                                                      | 26  | 0.492 | 1.468 | 0.053 | 0.189 | 1 | 3342 |
| REACTOME_CARBOXYTERMINAL_POST_TRANSLATIONAL_MODIFICATIONS_OF_TUBULIN                         | 26  | 0.498 | 1.466 | 0.033 | 0.191 | 1 | 2113 |
| REACTOME_PTK6_PROMOTES_HIF1A_STABILIZATION                                                   | 3   | 0.900 | 1.463 | 0.024 | 0.194 | 1 | 860  |
| REACTOME_UPTAKE_AND_FUNCTION_OF_ANTHRAX_TOXINS                                               | 11  | 0.623 | 1.462 | 0.057 | 0.196 | 1 | 3513 |
| REACTOME_EPHB_MEDIATED_FORWARD_SIGNALING                                                     | 39  | 0.451 | 1.462 | 0.035 | 0.195 | 1 | 3499 |
| REACTOME_SIGNALING_BY_EGFR                                                                   | 42  | 0.450 | 1.458 | 0.039 | 0.200 | 1 | 4119 |
| REACTOME_RUNX3_REGULATES_P14_ARF                                                             | 10  | 0.637 | 1.455 | 0.068 | 0.204 | 1 | 3249 |
| REACTOME_INTERLEUKIN_12_FAMILY_SIGNALING                                                     | 42  | 0.440 | 1.454 | 0.044 | 0.204 | 1 | 3443 |
| REACTOME_L1CAM_INTERACTIONS                                                                  | 84  | 0.402 | 1.452 | 0.022 | 0.206 | 1 | 2113 |
| REACTOME_SIGNALING_BY_FGF_R4                                                                 | 30  | 0.487 | 1.447 | 0.049 | 0.213 | 1 | 2887 |
| REACTOME_DEFECTIVE_CHST3_CAUSES_SEDCJD                                                       | 3   | 0.879 | 1.445 | 0.038 | 0.216 | 1 | 1541 |
| REACTOME_LEISHMANIA_INFECTION                                                                | 122 | 0.369 | 1.442 | 0.017 | 0.220 | 1 | 3050 |
| REACTOME_FCGAMMA_RECEPTOR_FCGR_DEPENDENT_PHAGOCYTOSIS                                        | 71  | 0.402 | 1.441 | 0.016 | 0.220 | 1 | 3192 |
| REACTOME_RUNX1_REGULATES_TRANSCRIPTION_OF_GENES_INVOLVED_IN_DIFFERENTIATION_OF_MYELOID_CELLS | 5   | 0.745 | 1.438 | 0.071 | 0.224 | 1 | 3249 |

|                                                                                             |     |       |       |       |       |   |      |
|---------------------------------------------------------------------------------------------|-----|-------|-------|-------|-------|---|------|
| REACTOME_TRANSCRIPTIONAL_ACTIVITY_OF_SMAD2_SMAD3_SMAD4_HETEROTRIMER                         | 43  | 0.434 | 1.437 | 0.041 | 0.224 | 1 | 3842 |
| REACTOME_SIGNALING_BY_TYROSINE_1_INSULIN_LIKE_GROWTH_FACTOR_1_RECEPTOR_IGF1R                | 31  | 0.468 | 1.437 | 0.064 | 0.224 | 1 | 1997 |
| REACTOME_VITAMIN_C_ASCORBATE_METABOLISM                                                     | 7   | 0.691 | 1.431 | 0.066 | 0.233 | 1 | 2297 |
| REACTOME_ADVANCED_GLYCOSYLATION_ENDPRODUCT_RECEPTOR_SIGNALING                               | 10  | 0.623 | 1.430 | 0.077 | 0.233 | 1 | 3602 |
| REACTOME_RHO_GTPASE_EFFECTORS                                                               | 241 | 0.338 | 1.429 | 0.010 | 0.234 | 1 | 3589 |
| REACTOME_PLATELET_SENSITIZATION_BY_LDL                                                      | 13  | 0.580 | 1.428 | 0.103 | 0.235 | 1 | 3235 |
| REACTOME_SEMA4D_INDUCED_CELL_MIGRATION_AND_GROWTH_CONE_COLLAPSE                             | 19  | 0.519 | 1.428 | 0.084 | 0.234 | 1 | 3574 |
| REACTOME_REGULATION_OF_CYTOSKELETAL_REMODELING_AND_CELL_SPREADING_BY_IPP_COMPLEX_COMPONENTS | 7   | 0.679 | 1.427 | 0.099 | 0.234 | 1 | 3882 |
| REACTOME_SIGNALING_BY_MET                                                                   | 63  | 0.404 | 1.427 | 0.040 | 0.234 | 1 | 3855 |
| REACTOME_BIOSYNTHESIS_OF_MARESINS                                                           | 2   | 0.964 | 1.426 | 0.008 | 0.234 | 1 | 243  |
| REACTOME_AGGREPHAGY                                                                         | 32  | 0.467 | 1.424 | 0.061 | 0.236 | 1 | 2317 |
| REACTOME_NCAM1_INTERACTIONS                                                                 | 15  | 0.552 | 1.424 | 0.090 | 0.236 | 1 | 1511 |
| REACTOME_ONCOGENIC_MAPK_SIGNALING                                                           | 74  | 0.394 | 1.423 | 0.023 | 0.237 | 1 | 2887 |
| REACTOME_ADRENOCEPTORS                                                                      | 2   | 0.948 | 1.420 | 0.022 | 0.241 | 1 | 172  |
| REACTOME_RHO_GTPASES_ACTIVATE_PAKS                                                          | 19  | 0.519 | 1.419 | 0.079 | 0.242 | 1 | 3546 |
| REACTOME_HSP90_CHAPERONE_CYCLE_FOR_STEROID_HORMONE_RECEPTORS_SHR                            | 44  | 0.432 | 1.419 | 0.064 | 0.241 | 1 | 2113 |
| REACTOME_VISUAL_PHOTOTRANSDUCTION                                                           | 47  | 0.427 | 1.416 | 0.048 | 0.245 | 1 | 1511 |
| REACTOME_ION_HOMEOSTASIS                                                                    | 32  | 0.458 | 1.415 | 0.055 | 0.246 | 1 | 2074 |
| REACTOME_DEFECTIVE_FACTOR_VIII_CAUSES_HEMOPHILIA_A                                          | 6   | 0.704 | 1.413 | 0.089 | 0.248 | 1 | 892  |
| REACTOME_ABERRANT_REGULATION_OF_MITOTIC_G1_S_TRANSITION_IN_CANCER_DUE_TO_RB1_DEFECTS        | 16  | 0.544 | 1.412 | 0.071 | 0.249 | 1 | 1052 |
| REACTOME_RUNX2_REGULATES_GENES_INVOLVED_IN_CELL_MIGRATION                                   | 6   | 0.706 | 1.407 | 0.092 | 0.256 | 1 | 3080 |
| REACTOME_ACTIVATION_OF_RAC1                                                                 | 10  | 0.617 | 1.406 | 0.110 | 0.256 | 1 | 3342 |

|                                                                                 |     |       |       |       |       |   |      |
|---------------------------------------------------------------------------------|-----|-------|-------|-------|-------|---|------|
| REACTOME_TRANSPORT_OF_FATTY_ACIDS                                               | 2   | 0.955 | 1.406 | 0.021 | 0.257 | 1 | 383  |
| REACTOME_SYNTHESIS_OF_ACTIVE_UBIQUITIN_ROLES_OF_E1_AND_E2_ENZYMES               | 30  | 0.469 | 1.405 | 0.066 | 0.256 | 1 | 4023 |
| REACTOME_SIGNALING_BY_NUCLEAR_CLEAR_RECEPTORS                                   | 195 | 0.339 | 1.404 | 0.013 | 0.257 | 1 | 2057 |
| REACTOME_IRS_MEDIATED_SIGNALING                                                 | 29  | 0.462 | 1.402 | 0.063 | 0.260 | 1 | 1997 |
| REACTOME_GOLGI_TO_ER_RETROGRADE_TRANSPORT                                       | 118 | 0.361 | 1.401 | 0.030 | 0.260 | 1 | 1883 |
| REACTOME_NADE_MODULATES_DEATH_SIGNALING                                         | 5   | 0.751 | 1.400 | 0.083 | 0.261 | 1 | 4    |
| REACTOME_FGFR2_LIGAND_BINDING_AND_ACTIVATION                                    | 5   | 0.736 | 1.400 | 0.092 | 0.260 | 1 | 1208 |
| REACTOME_EARLY_PHASE_OF_HIV_LIFE_CYCLE                                          | 13  | 0.575 | 1.396 | 0.093 | 0.266 | 1 | 2792 |
| REACTOME_PHOSPHOLIPASE_C_MEDIATED_CASCADE_FGFR4                                 | 5   | 0.743 | 1.395 | 0.090 | 0.268 | 1 | 1208 |
| REACTOME_PI_3K_CASCADE_FGFR4                                                    | 9   | 0.627 | 1.392 | 0.099 | 0.271 | 1 | 1208 |
| REACTOME_SMAD2_SMAD3_SMAD4_HETEROTRIMER_REGULATES_TRANSCRIPTION                 | 31  | 0.455 | 1.391 | 0.067 | 0.272 | 1 | 2159 |
| REACTOME_ACTIVATION_OF_THE_TFAP2_AP_2_FAMILY_OF_TRANSCRIPTION_FACTORS           | 9   | 0.615 | 1.391 | 0.091 | 0.271 | 1 | 234  |
| REACTOME_REGULATION_OF_GLYCOLYSIS_BY_FRUCTOSE_2_6_BISPHOSPHATE_METABOLISM       | 10  | 0.603 | 1.390 | 0.103 | 0.271 | 1 | 2960 |
| REACTOME_SIGNALING_BY_FGF_R2                                                    | 57  | 0.403 | 1.389 | 0.047 | 0.272 | 1 | 4118 |
| REACTOME_SHC_MEDIATED_CASCADE_FGFR1                                             | 9   | 0.621 | 1.386 | 0.100 | 0.276 | 1 | 4118 |
| REACTOME_COMMON_PATHWAY_OF_FIBRIN_CLOT_FORMATION                                | 11  | 0.576 | 1.386 | 0.109 | 0.275 | 1 | 301  |
| REACTOME_RSK_ACTIVATION                                                         | 7   | 0.663 | 1.386 | 0.094 | 0.274 | 1 | 2887 |
| REACTOME_FGFR1_LIGAND_BINDING_AND_ACTIVATION                                    | 3   | 0.843 | 1.385 | 0.058 | 0.275 | 1 | 1997 |
| REACTOME_RUNX2_REGULATES_CHONDROCYTE_MATURATION                                 | 3   | 0.832 | 1.385 | 0.078 | 0.275 | 1 | 1966 |
| REACTOME_DERMATAN_SULFATE_BIOSYNTHESIS                                          | 5   | 0.732 | 1.384 | 0.101 | 0.276 | 1 | 1541 |
| REACTOME_TP53_REGULATES_TRANSCRIPTION_OF_GENES_INVOLVED_IN_G1_CELL_CYCLE_ARREST | 13  | 0.551 | 1.384 | 0.113 | 0.275 | 1 | 462  |
| REACTOME_INTRACELLULAR_SIGNALING_BY_SECOND_MESSENGERS                           | 247 | 0.326 | 1.383 | 0.006 | 0.276 | 1 | 2742 |
| REACTOME_EPHA_MEDIATED_GROWTH_CONE_COLLAPSE                                     | 23  | 0.481 | 1.382 | 0.091 | 0.277 | 1 | 1916 |

|                                                                                    |     |       |       |       |       |   |      |
|------------------------------------------------------------------------------------|-----|-------|-------|-------|-------|---|------|
| REACTOME_TBC_RABGAPS                                                               | 39  | 0.421 | 1.381 | 0.082 | 0.276 | 1 | 2814 |
| REACTOME_TOLL_LIKE_RECEPTOR_CASCADES                                               | 121 | 0.355 | 1.381 | 0.031 | 0.277 | 1 | 2317 |
| REACTOME_CHYLOMICRON_CLEARANCE                                                     | 4   | 0.763 | 1.380 | 0.102 | 0.276 | 1 | 1141 |
| REACTOME_PI_3K_CASCADE_FGFR2                                                       | 8   | 0.624 | 1.377 | 0.115 | 0.282 | 1 | 1208 |
| REACTOME_SIGNALING_BY_ACTIVIN                                                      | 10  | 0.592 | 1.375 | 0.105 | 0.284 | 1 | 1697 |
| REACTOME_SPHINGOLIPID_DENOVO_BIOSYNTHESIS                                          | 35  | 0.440 | 1.375 | 0.072 | 0.283 | 1 | 2947 |
| REACTOME_SIGNALING_BY_RHO_GTPASES                                                  | 348 | 0.313 | 1.374 | 0.001 | 0.283 | 1 | 2632 |
| REACTOME_SUMOYLATION_OF_TRANSCRIPTION_COFACTORS                                    | 43  | 0.412 | 1.374 | 0.064 | 0.283 | 1 | 3604 |
| REACTOME_SIGNALLING_TO_RAS                                                         | 17  | 0.528 | 1.373 | 0.102 | 0.284 | 1 | 4526 |
| REACTOME_ACTIVATION_OF_MATRIX_METALLOPROTEINASES                                   | 14  | 0.550 | 1.370 | 0.118 | 0.288 | 1 | 1528 |
| REACTOME_PI5P_REGULATES_TP53_ACETYLATION                                           | 9   | 0.615 | 1.369 | 0.117 | 0.288 | 1 | 2725 |
| REACTOME_RUNX1_AND_FOXP3_CONTROL_THE_DEVELOPMENT_OF_REGULATORY_T_LYMPHOCYTES_TREGS | 5   | 0.731 | 1.369 | 0.106 | 0.288 | 1 | 3426 |
| REACTOME_IRS_ACTIVATION                                                            | 4   | 0.756 | 1.369 | 0.106 | 0.287 | 1 | 570  |
| REACTOME_NUCLEAR_ENVELOPE_NE_REASSEMBLY                                            | 68  | 0.382 | 1.368 | 0.043 | 0.288 | 1 | 2949 |
| REACTOME_CARGO_RECOGNITION_FOR_CLATHRIN_MEDIATED_ENDOCYTOSIS                       | 78  | 0.376 | 1.367 | 0.052 | 0.288 | 1 | 3953 |
| REACTOME_DOWNSTREAM_SIGNALING_OF_ACTIVATED_FGFR4                                   | 16  | 0.511 | 1.366 | 0.101 | 0.290 | 1 | 1208 |
| REACTOME_CLASS_B_2_SECRETIN_FAMILY_RECEPTORS                                       | 38  | 0.424 | 1.365 | 0.073 | 0.291 | 1 | 1257 |
| REACTOME_CROSS_PRESENTATION_OF_PARTICULATE_EXOGENOUS_ANTIGENS_PHAGOSOMES           | 3   | 0.813 | 1.364 | 0.101 | 0.291 | 1 | 1967 |
| REACTOME_INTERLEUKIN_21_SIGNALING                                                  | 6   | 0.686 | 1.358 | 0.132 | 0.302 | 1 | 2771 |
| REACTOME_SIGNALING_BY_NTRK3_TRKC                                                   | 15  | 0.530 | 1.357 | 0.110 | 0.303 | 1 | 770  |
| REACTOME_SIGNALING_BY_NODAL                                                        | 12  | 0.573 | 1.356 | 0.112 | 0.303 | 1 | 1367 |
| REACTOME_EGR2_AND_SOX10_MEDIATED_INITIATION_OF_SCHWANN_CELL_MYELINATION            | 24  | 0.472 | 1.352 | 0.101 | 0.309 | 1 | 1320 |
| REACTOME_SUPPRESSION_OF_APOPTOSIS                                                  | 6   | 0.681 | 1.352 | 0.122 | 0.309 | 1 | 3275 |
| REACTOME_PHASE_0_RAPID_DEPOLARISATION                                              | 16  | 0.517 | 1.351 | 0.122 | 0.310 | 1 | 2906 |

|                                                                                          |     |       |       |       |       |   |      |
|------------------------------------------------------------------------------------------|-----|-------|-------|-------|-------|---|------|
| REACTOME_CHYLOMICRON_REMODELING                                                          | 1   | 0.992 | 1.350 | 0.020 | 0.311 | 1 | 99   |
| REACTOME_PI_3K_CASCADE_FR3                                                               | 8   | 0.632 | 1.349 | 0.109 | 0.311 | 1 | 1208 |
| REACTOME_REGULATION_OF_IFNG_SIGNALING                                                    | 13  | 0.552 | 1.348 | 0.110 | 0.313 | 1 | 4537 |
| REACTOME_INTRINSIC_PATHWAY_OF_FIBRIN_CLOT_FORMATI<br>ON                                  | 10  | 0.584 | 1.346 | 0.144 | 0.316 | 1 | 301  |
| REACTOME_METABOLISM_OF_FAT_SOLUBLE_VITAMINS                                              | 27  | 0.459 | 1.345 | 0.120 | 0.316 | 1 | 1511 |
| REACTOME_DEFECTIVE_CHSY1_CAUSES_TPBS                                                     | 3   | 0.816 | 1.344 | 0.097 | 0.318 | 1 | 1541 |
| REACTOME_NR1H3_NR1H2_REGULATE_GENE_EXPRESSION_LINKED_TO_CHOLESTEROL_TRANSPORT_AND_EFFLUX | 31  | 0.434 | 1.343 | 0.090 | 0.318 | 1 | 1671 |
| REACTOME_TRANSPORT_OF_SMALL_MOLECULES                                                    | 455 | 0.298 | 1.342 | 0.001 | 0.320 | 1 | 1863 |
| REACTOME_INTERLEUKIN_2_SIGNALING                                                         | 7   | 0.651 | 1.341 | 0.130 | 0.320 | 1 | 971  |
| REACTOME_KINESINS                                                                        | 50  | 0.398 | 1.341 | 0.062 | 0.320 | 1 | 1025 |
| REACTOME_P38MAPK_EVENTS                                                                  | 13  | 0.542 | 1.339 | 0.112 | 0.322 | 1 | 4927 |
| REACTOME_REGULATION_OF_COMMISSURAL_AXON_PATHFINDING_BY_SLIT_AND_ROBO                     | 4   | 0.749 | 1.333 | 0.113 | 0.332 | 1 | 2948 |
| REACTOME_SYNTHESIS_OF_PIP3_AT_THE_PLASMA_MEMBRANE                                        | 45  | 0.403 | 1.333 | 0.085 | 0.331 | 1 | 2725 |
| REACTOME_SIGNALING_BY_ERBB4                                                              | 38  | 0.419 | 1.333 | 0.100 | 0.332 | 1 | 1375 |
| REACTOME_MHC_CLASS_II_ANTIGEN_PRESENTATION                                               | 95  | 0.358 | 1.331 | 0.061 | 0.334 | 1 | 2913 |
| REACTOME_FGFR2C_LIGAND_BINDING_AND_ACTIVATION                                            | 2   | 0.905 | 1.328 | 0.080 | 0.339 | 1 | 1208 |
| REACTOME_ACTIVATION_OF_THE_PHOTOTRANSDUCTION_CASCADE                                     | 2   | 0.867 | 1.327 | 0.117 | 0.339 | 1 | 254  |
| REACTOME_ACTIVATED_NTRK3_SIGNALS_THROUGH_RAS                                             | 7   | 0.636 | 1.327 | 0.153 | 0.340 | 1 | 770  |
| REACTOME_INLA_MEDIATED_ENTRY_OF_LISTERIA_MONOCYTOGENES_INTO_HOST_CELLS                   | 9   | 0.597 | 1.326 | 0.147 | 0.339 | 1 | 3842 |
| REACTOME_UPTAKE_AND_FUNCTION_OF_DIPHTEHRIA_TOXIN                                         | 6   | 0.676 | 1.326 | 0.140 | 0.338 | 1 | 1562 |
| REACTOME_PHASE_3_RAPID_REPOLARISATION                                                    | 4   | 0.745 | 1.326 | 0.137 | 0.338 | 1 | 446  |
| REACTOME_PRE_NOTCH_PROCESSING_IN_GOLGI                                                   | 16  | 0.500 | 1.325 | 0.141 | 0.338 | 1 | 2606 |
| REACTOME_NEGATIVE_REGULATION_OF_MET_ACTIVITY                                             | 18  | 0.482 | 1.325 | 0.146 | 0.337 | 1 | 4537 |
| REACTOME_RUNX1_REGULATES_GENES_INVOLVED_IN_MEGAK                                         | 44  | 0.396 | 1.323 | 0.107 | 0.340 | 1 | 1204 |

|                                                                                                                    |     |       |       |       |       |   |      |
|--------------------------------------------------------------------------------------------------------------------|-----|-------|-------|-------|-------|---|------|
| ARYOCYTE_DIFFERENTIATION_A<br>ND_PLATELET_FUNCTION<br>REACTOME_ACTIVATED_TAK1_<br>MEDIATES_P38_MAPK_ACTIVAT<br>ION | 23  | 0.460 | 1.322 | 0.115 | 0.342 | 1 | 2889 |
| REACTOME_SIGNALING_BY_FGF<br>R3                                                                                    | 30  | 0.436 | 1.320 | 0.114 | 0.344 | 1 | 2887 |
| REACTOME_LAMININ_INTERACT<br>IONS                                                                                  | 22  | 0.457 | 1.320 | 0.124 | 0.344 | 1 | 1462 |
| REACTOME_SUPPRESSION_OF_P<br>HAGOSOMAL_MATURATION                                                                  | 12  | 0.547 | 1.318 | 0.144 | 0.346 | 1 | 2653 |
| REACTOME_INFLAMMASOMES                                                                                             | 12  | 0.562 | 1.316 | 0.148 | 0.349 | 1 | 2185 |
| REACTOME_DEFECTIVE_FACTOR<br>_IX_CAUSES_HEMOPHILIA_B                                                               | 3   | 0.790 | 1.316 | 0.135 | 0.349 | 1 | 301  |
| REACTOME_PTK6_REGULATES_R<br>HO_GTPASES_RAS_GTPASE_AN<br>D_MAP_KINASES                                             | 13  | 0.529 | 1.315 | 0.156 | 0.350 | 1 | 4118 |
| REACTOME_ASSEMBLY_OF_ACTI<br>VE_LPL_AND_LIPC_LIPASE_COM<br>PLEXES                                                  | 11  | 0.563 | 1.315 | 0.148 | 0.349 | 1 | 1248 |
| REACTOME_PHOSPHOLIPASE_C_<br>MEDIATED_CASCADE_FGFR2                                                                | 4   | 0.751 | 1.313 | 0.149 | 0.351 | 1 | 1208 |
| REACTOME_FRS_MEDIATED_FG<br>FR4_SIGNALING                                                                          | 12  | 0.536 | 1.311 | 0.151 | 0.355 | 1 | 1208 |
| REACTOME_SIGNALING_BY_FGF<br>R_IN_DISEASE                                                                          | 48  | 0.390 | 1.310 | 0.100 | 0.355 | 1 | 3012 |
| REACTOME_RAS_ACTIVATION_U<br>PON_CA2_INFLUX_THROUGH_N<br>MDA_RECEPTOR                                              | 14  | 0.509 | 1.308 | 0.140 | 0.358 | 1 | 2027 |
| REACTOME_INTERLEUKIN_20_F<br>AMILY_SIGNALING                                                                       | 16  | 0.486 | 1.307 | 0.140 | 0.359 | 1 | 146  |
| REACTOME_DOWNSTREAM_SIG<br>NALING_OF_ACTIVATED_FGFR2                                                               | 15  | 0.503 | 1.306 | 0.135 | 0.361 | 1 | 1208 |
| REACTOME_BIOSYNTHESIS_OF_<br>MARESIN_LIKE_SPMS                                                                     | 1   | 0.981 | 1.306 | 0.045 | 0.360 | 1 | 243  |
| REACTOME_CREATINE_METABO<br>LISM                                                                                   | 5   | 0.689 | 1.305 | 0.169 | 0.361 | 1 | 889  |
| REACTOME_DOWNSTREAM_SIG<br>NALING_OF_ACTIVATED_FGFR3                                                               | 15  | 0.509 | 1.303 | 0.133 | 0.363 | 1 | 1208 |
| REACTOME_MYOGENESIS                                                                                                | 16  | 0.501 | 1.303 | 0.127 | 0.362 | 1 | 3463 |
| REACTOME_GAP_JUNCTION_DE<br>GRADATION                                                                              | 11  | 0.550 | 1.303 | 0.156 | 0.361 | 1 | 2601 |
| REACTOME_MET_ACTIVATES_R<br>AS_SIGNALING                                                                           | 9   | 0.585 | 1.303 | 0.169 | 0.361 | 1 | 4118 |
| REACTOME_RHO_GTPASE_CYCL<br>E                                                                                      | 117 | 0.337 | 1.301 | 0.051 | 0.363 | 1 | 2102 |
| REACTOME_NUCLEAR_SIGNALIN<br>G_BY_ERBB4                                                                            | 20  | 0.478 | 1.300 | 0.147 | 0.364 | 1 | 1375 |
| REACTOME_PROTEIN_FOLDING                                                                                           | 75  | 0.361 | 1.300 | 0.078 | 0.363 | 1 | 3770 |
| REACTOME_NEF_AND_SIGNAL_<br>TRANSDUCTION                                                                           | 4   | 0.726 | 1.299 | 0.156 | 0.365 | 1 | 2981 |

|                                                                                              |     |       |       |       |       |   |      |
|----------------------------------------------------------------------------------------------|-----|-------|-------|-------|-------|---|------|
| REACTOME_THYROXINE_BIOSYNTHESIS                                                              | 1   | 0.965 | 1.296 | 0.065 | 0.370 | 1 | 443  |
| REACTOME_SIGNALING_BY_MODERATE_KINASE_ACTIVITY_BRAF_MUTANTS                                  | 38  | 0.407 | 1.296 | 0.128 | 0.370 | 1 | 3589 |
| REACTOME_SUMOYLATION_OF_TRANSCRIPTION_FACTORS                                                | 19  | 0.466 | 1.296 | 0.134 | 0.369 | 1 | 3483 |
| REACTOME_ACTIVATED_NTRK3_SIGNALS_THROUGH_PI3K                                                | 5   | 0.704 | 1.296 | 0.164 | 0.368 | 1 | 226  |
| REACTOME_RUNX1_REGULATES_TRANSCRIPTION_OF_GENES_INVOLVED_IN_DIFFERENTIATION_OF_KERATINOCYTES | 7   | 0.615 | 1.295 | 0.169 | 0.369 | 1 | 686  |
| REACTOME_MET_INTERACTS_WITH_TNS_PROTEINS                                                     | 4   | 0.731 | 1.295 | 0.171 | 0.368 | 1 | 2143 |
| REACTOME_CHOLINE_CATABOLISM                                                                  | 4   | 0.729 | 1.295 | 0.184 | 0.367 | 1 | 353  |
| REACTOME_VEGF_LIGAND_RECEPTOR_INTERACTIONS                                                   | 3   | 0.783 | 1.294 | 0.164 | 0.368 | 1 | 1621 |
| REACTOME_PLATELET_HOMEOSTASIS                                                                | 45  | 0.391 | 1.293 | 0.133 | 0.369 | 1 | 2618 |
| REACTOME_EGFR_TRANSACTIVATION_BY_GASTRIN                                                     | 7   | 0.618 | 1.291 | 0.181 | 0.372 | 1 | 102  |
| REACTOME_PD_1_SIGNALING                                                                      | 6   | 0.636 | 1.291 | 0.194 | 0.371 | 1 | 4442 |
| REACTOME_NOTCH2_ACTIVATION_AND_TRANSMISSION_OF_SIGNAL_TO_THE_NUCLEUS                         | 20  | 0.457 | 1.289 | 0.157 | 0.373 | 1 | 1273 |
| REACTOME_RHO_GTPASES_ACTIVATE_PKNS                                                           | 39  | 0.393 | 1.288 | 0.130 | 0.375 | 1 | 2597 |
| REACTOME_VLDL_ASSEMBLY                                                                       | 2   | 0.862 | 1.287 | 0.140 | 0.376 | 1 | 685  |
| REACTOME_DISEASES_OF_METABOLISM                                                              | 165 | 0.319 | 1.287 | 0.054 | 0.375 | 1 | 1541 |
| REACTOME_ASPARAGINE_N_LINKED_GLYCOSYLATION                                                   | 262 | 0.303 | 1.287 | 0.033 | 0.374 | 1 | 3899 |
| REACTOME_CONSTITUTIVE_SIGNALING_BY_AKT1_E17K_IN_CANCER                                       | 26  | 0.434 | 1.284 | 0.155 | 0.378 | 1 | 714  |
| REACTOME_MAPK3_ERK1_ACTIVATION                                                               | 9   | 0.568 | 1.283 | 0.182 | 0.379 | 1 | 3168 |
| REACTOME_ABC_TRANSPORTERS_IN_LIPID_HOMEOSTASIS                                               | 9   | 0.565 | 1.283 | 0.173 | 0.380 | 1 | 3568 |
| REACTOME_SHC1_EVENTS_IN_ERBB2_SIGNALING                                                      | 15  | 0.500 | 1.280 | 0.189 | 0.385 | 1 | 1170 |
| REACTOME_MET_ACTIVATES_PT_K2_SIGNALING                                                       | 20  | 0.471 | 1.279 | 0.170 | 0.385 | 1 | 1146 |
| REACTOME_THE_ROLE_OF_NEF_IN_HIV_1_REPLICATION_AND_DISEASE_PATHOGENESIS                       | 22  | 0.462 | 1.279 | 0.160 | 0.385 | 1 | 2981 |
| REACTOME_INTERLEUKIN_RECEPTOR_SHC_SIGNALING                                                  | 15  | 0.493 | 1.278 | 0.155 | 0.385 | 1 | 3687 |
| REACTOME_SPRY_REGULATION_OF_FGF_SIGNALING                                                    | 16  | 0.495 | 1.277 | 0.163 | 0.386 | 1 | 3842 |

|                                                                                                               |     |       |       |       |       |   |      |
|---------------------------------------------------------------------------------------------------------------|-----|-------|-------|-------|-------|---|------|
| REACTOME_SIGNALING_BY_ERYTHROPOIETIN                                                                          | 21  | 0.462 | 1.274 | 0.152 | 0.391 | 1 | 3288 |
| REACTOME_PTK6_REGULATES_RTKS_AND_THEIR_EFFECTORS_AKT1_AND_DOK1                                                | 9   | 0.559 | 1.273 | 0.183 | 0.393 | 1 | 3842 |
| REACTOME_TRANSCRIPTIONAL_REGULATION_BY_RUNX1                                                                  | 162 | 0.314 | 1.273 | 0.065 | 0.392 | 1 | 1204 |
| REACTOME_INLB_MEDIATED_ENTRY_OF_LISTERIA_MONOCYTOGENES_INTO_HOST_CELL                                         | 13  | 0.513 | 1.273 | 0.203 | 0.392 | 1 | 3855 |
| REACTOME_EPH_EPHRIN_MEDIATED_REPULSION_OF_CELLS                                                               | 42  | 0.395 | 1.272 | 0.126 | 0.392 | 1 | 2601 |
| REACTOME_FCERI_MEDIATED_CLASS_2_MOBILIZATION                                                                  | 23  | 0.442 | 1.271 | 0.160 | 0.392 | 1 | 937  |
| REACTOME_CLASS_C_3_METABOTROPIC_Glutamate_PHEROMONE_RECEPTORS                                                 | 3   | 0.769 | 1.271 | 0.161 | 0.393 | 1 | 266  |
| REACTOME_HCMV_EARLY_EVENTS                                                                                    | 72  | 0.360 | 1.270 | 0.108 | 0.393 | 1 | 2113 |
| REACTOME_THROMBIN_SIGNALING_THROUGH_PROTEINASE_ACTIVATED_RECEPTORS_PARS                                       | 19  | 0.477 | 1.270 | 0.170 | 0.393 | 1 | 1425 |
| REACTOME_MET_ACTIVATES_RAP1_AND_RAC1                                                                          | 9   | 0.568 | 1.269 | 0.185 | 0.393 | 1 | 3687 |
| REACTOME_IRE1ALPHA_ACTIVATES_CHAPERONES                                                                       | 47  | 0.380 | 1.268 | 0.125 | 0.394 | 1 | 2724 |
| REACTOME_SUMO_IS_PROTEOLYTICALLY_PROCESSED                                                                    | 6   | 0.626 | 1.268 | 0.204 | 0.394 | 1 | 4753 |
| REACTOME_FGFR1C_LIGAND_BINDING_AND_ACTIVATION                                                                 | 2   | 0.843 | 1.266 | 0.150 | 0.397 | 1 | 1997 |
| REACTOME_CROSSLINKING_OF_COLLAGEN_FIBRILS                                                                     | 9   | 0.553 | 1.265 | 0.175 | 0.398 | 1 | 611  |
| REACTOME_PROSTANOID_LIGAND_RECEPTORS                                                                          | 1   | 0.949 | 1.263 | 0.102 | 0.400 | 1 | 652  |
| REACTOME_SYNTHESIS_OF_PEP                                                                                     | 10  | 0.543 | 1.262 | 0.188 | 0.402 | 1 | 2886 |
| REACTOME_IMMUNOREGULATORY_INTERACTIONS_BETWEEN_A_LYMPHOID_AND_A_NON_LYMPHOID_CELL                             | 29  | 0.414 | 1.261 | 0.168 | 0.404 | 1 | 2991 |
| REACTOME_REGULATION_OF_SIGNALING_BY_CBL                                                                       | 20  | 0.450 | 1.259 | 0.171 | 0.407 | 1 | 2159 |
| REACTOME_RUNX3_REGULATES_BCL2L1_BIM_TRANSCRIPTION                                                             | 5   | 0.658 | 1.257 | 0.197 | 0.410 | 1 | 1367 |
| REACTOME_DEFECTIVE_C1GALT1C1_CAUSES_TN_POLYAGGLUTINATION_SYNDROME_TNPS                                        | 5   | 0.669 | 1.257 | 0.184 | 0.409 | 1 | 1156 |
| REACTOME_SURFACTANT_METABOLISM                                                                                | 11  | 0.536 | 1.256 | 0.174 | 0.409 | 1 | 1592 |
| REACTOME_PHOSPHORYLATION_SITE_MUTANTS_OF_CTNNB1_ARE_NOT_TARGETED_TO_THE_PROTEASOME_BY_THE_DESTRUCTIVE_COMPLEX | 15  | 0.482 | 1.255 | 0.200 | 0.411 | 1 | 4060 |

|                                                                                |     |       |       |       |       |   |      |
|--------------------------------------------------------------------------------|-----|-------|-------|-------|-------|---|------|
| REACTOME_LYSOSOME_VESICLE_BIOGENESIS                                           | 31  | 0.411 | 1.255 | 0.162 | 0.410 | 1 | 4650 |
| REACTOME_P75NTR_RECRUITS_SIGNALLING_COMPLEXES                                  | 12  | 0.502 | 1.255 | 0.190 | 0.409 | 1 | 3842 |
| REACTOME_POST_TRANSLATIONAL_MODIFICATION_SYNTHESIS_OF_GPI_ANCHORED_PROTEINS    | 40  | 0.391 | 1.254 | 0.146 | 0.409 | 1 | 872  |
| REACTOME_FRS_MEDIATED_FG_FR2_SIGNALING                                         | 11  | 0.527 | 1.254 | 0.213 | 0.408 | 1 | 1208 |
| REACTOME_LONG_TERM_POTENTIATION                                                | 11  | 0.519 | 1.253 | 0.191 | 0.409 | 1 | 2027 |
| REACTOME_FRS_MEDIATED_FG_FR3_SIGNALING                                         | 11  | 0.536 | 1.252 | 0.215 | 0.411 | 1 | 1208 |
| REACTOME_DSCAM_INTERACTIONS                                                    | 7   | 0.600 | 1.251 | 0.211 | 0.412 | 1 | 3067 |
| REACTOME_REGULATION_OF_TLR_BY_ENDOGENOUS_LIGAND                                | 5   | 0.654 | 1.251 | 0.221 | 0.411 | 1 | 1424 |
| REACTOME_UNBLOCKING_OF_NMDA_RECEPTORS_GLUTAMATE_BINDING_AND_ACTIVATION         | 10  | 0.540 | 1.251 | 0.207 | 0.411 | 1 | 2027 |
| REACTOME_SIGNAL_REGULATORY_PROTEIN_FAMILY_INTERACTIONS                         | 10  | 0.541 | 1.248 | 0.190 | 0.415 | 1 | 4442 |
| REACTOME_RAF_ACTIVATION                                                        | 32  | 0.412 | 1.248 | 0.158 | 0.416 | 1 | 4224 |
| REACTOME_CIRCADIAN_CLOCK                                                       | 67  | 0.351 | 1.247 | 0.129 | 0.415 | 1 | 3842 |
| REACTOME_PHENYLALANINE_AND_TYROSINE_METABOLISM                                 | 7   | 0.595 | 1.247 | 0.233 | 0.416 | 1 | 3543 |
| REACTOME_NETRIN_MEDIATED_REPULSION_SIGNALS                                     | 4   | 0.707 | 1.246 | 0.202 | 0.416 | 1 | 453  |
| REACTOME_INTERLEUKIN_23_SIGNALING                                              | 5   | 0.661 | 1.246 | 0.230 | 0.415 | 1 | 31   |
| REACTOME_DISEASES_OF_PROGRAMMED_CELL_DEATH                                     | 23  | 0.436 | 1.246 | 0.180 | 0.414 | 1 | 673  |
| REACTOME_INTERLEUKIN_3_INTERLEUKIN_5_AND_GM-CSF_SIGNALING                      | 34  | 0.394 | 1.246 | 0.158 | 0.414 | 1 | 4643 |
| REACTOME_FACTORS_INVOLVED_IN_MEGAKARYOCYTE_DEVELOPMENT_AND_PLATELET_PRODUCTION | 117 | 0.319 | 1.245 | 0.090 | 0.415 | 1 | 2113 |
| REACTOME_LYSOSPHINGOLIPID_AND_LPA_RECEPTORS                                    | 6   | 0.621 | 1.245 | 0.220 | 0.414 | 1 | 1478 |
| REACTOME_SUMOYLATION_OF_IMMUNE_RESPONSE_PROTEINS                               | 11  | 0.528 | 1.243 | 0.198 | 0.417 | 1 | 5290 |
| REACTOME_MET_PROMOTES_CELL_MOTILITY                                            | 30  | 0.407 | 1.243 | 0.180 | 0.416 | 1 | 3341 |
| REACTOME_CREATION_OF_C4_AND_C2_ACTIVATORS                                      | 2   | 0.838 | 1.240 | 0.190 | 0.421 | 1 | 2064 |
| REACTOME_ESTROGEN_DEPENDENT_GENE_EXPRESSION                                    | 93  | 0.333 | 1.238 | 0.121 | 0.423 | 1 | 3542 |
| REACTOME_CYCLIN_D_ASSOCIATED_EVENTS_IN_G1                                      | 46  | 0.376 | 1.236 | 0.140 | 0.428 | 1 | 2397 |

|                                                                                                         |     |       |       |       |       |   |      |
|---------------------------------------------------------------------------------------------------------|-----|-------|-------|-------|-------|---|------|
| REACTOME_SIGNALING_BY_MRAS_COMPLEX_MUTANTS                                                              | 8   | 0.567 | 1.235 | 0.213 | 0.429 | 1 | 3484 |
| REACTOME_STIMULI_SENSING_CHANNELS                                                                       | 57  | 0.355 | 1.232 | 0.148 | 0.434 | 1 | 2203 |
| REACTOME_RNA_POLYMERASE_III_CHAIN_ELONGATION                                                            | 18  | 0.458 | 1.232 | 0.200 | 0.433 | 1 | 1742 |
| REACTOME_RUNX3_REGULATES_IMMUNE_RESPONSE_AND_CELL_MIGRATION                                             | 2   | 0.809 | 1.231 | 0.189 | 0.433 | 1 | 1966 |
| REACTOME_ONCOGENE_INDUCED_SENESCENCE                                                                    | 33  | 0.402 | 1.231 | 0.181 | 0.433 | 1 | 3170 |
| REACTOME_ENOS_ACTIVATION                                                                                | 10  | 0.534 | 1.231 | 0.225 | 0.432 | 1 | 1167 |
| REACTOME_FGFR1B_LIGAND_BINDING_AND_ACTIVATION                                                           | 2   | 0.843 | 1.229 | 0.194 | 0.436 | 1 | 1997 |
| REACTOME_PROLONGED_ERK_ACTIVATION_EVENTS                                                                | 12  | 0.507 | 1.227 | 0.208 | 0.438 | 1 | 3513 |
| REACTOME_ACTIVATED_NTRK2_SIGNALS_THROUGH_CDK5                                                           | 5   | 0.625 | 1.224 | 0.259 | 0.443 | 1 | 2678 |
| REACTOME_NEF_MEDIATED_CD4_DOWN_REGULATION                                                               | 9   | 0.548 | 1.223 | 0.235 | 0.446 | 1 | 2653 |
| REACTOME_ACTIVATION_OF_BH3_ONLY_PROTEINS                                                                | 29  | 0.405 | 1.222 | 0.194 | 0.446 | 1 | 3484 |
| REACTOME_ELECTRIC_TRANSMISSION_ACROSS_GAP_JUNCTIONS                                                     | 2   | 0.826 | 1.222 | 0.181 | 0.445 | 1 | 2209 |
| REACTOME_SIGNALING_BY_KIT_IN_DISEASE                                                                    | 19  | 0.451 | 1.222 | 0.213 | 0.444 | 1 | 4612 |
| REACTOME_G_ALPHA_I_SIGNALING_EVENTS                                                                     | 145 | 0.307 | 1.222 | 0.103 | 0.444 | 1 | 3414 |
| REACTOME_TP53_REGULATES_TRANSCRIPTION_OF_CELL_CYCLE_GENES                                               | 48  | 0.362 | 1.220 | 0.155 | 0.446 | 1 | 1074 |
| REACTOME_APOBEC3G_MEDIATED_RESISTANCE_TO_HIV_1_INFECTION                                                | 5   | 0.638 | 1.220 | 0.222 | 0.445 | 1 | 3854 |
| REACTOME_RUNX1_REGULATES_TRANSCRIPTION_OF_GENES_INVOLVED_IN_WNT_SIGNALING                               | 4   | 0.678 | 1.220 | 0.234 | 0.445 | 1 | 3426 |
| REACTOME_NEF_MEDIATES_DOWN_MODULATION_OF_CELL_SURFACE_RECEPTORS_BY_RECRUITING_THEM_TO_CLATHRIN_ADAPTERS | 19  | 0.450 | 1.219 | 0.213 | 0.447 | 1 | 2755 |
| REACTOME_TRAF6_MEDIATED_INDUCION_OF_TAK1_COMPLEX_WITHIN_TLR4_COMPLEX                                    | 14  | 0.487 | 1.218 | 0.228 | 0.447 | 1 | 4190 |
| REACTOME_INTERLEUKIN_27_SIGNALING                                                                       | 8   | 0.564 | 1.218 | 0.245 | 0.446 | 1 | 3168 |
| REACTOME_VEGFR2_MEDIATED_VASCULAR_PERMEABILITY                                                          | 23  | 0.425 | 1.216 | 0.208 | 0.450 | 1 | 3080 |
| REACTOME_SOS_MEDIATED_SIGNALING                                                                         | 7   | 0.591 | 1.215 | 0.243 | 0.450 | 1 | 4118 |

|                                                                                            |     |       |       |       |       |   |      |
|--------------------------------------------------------------------------------------------|-----|-------|-------|-------|-------|---|------|
| REACTOME_NRAGE_SIGNALS_D<br>EATH_THROUGH_JNK                                               | 52  | 0.359 | 1.215 | 0.162 | 0.449 | 1 | 615  |
| REACTOME_SELECTIVE_AUTOPH<br>AGY                                                           | 69  | 0.338 | 1.214 | 0.169 | 0.451 | 1 | 2317 |
| REACTOME_TRANSPORT_OF_N<br>UCLEOTIDE_SUGARS                                                | 9   | 0.531 | 1.214 | 0.227 | 0.451 | 1 | 1636 |
| REACTOME_G_ALPHA_12_13_SI<br>GNALLING_EVENTS                                               | 60  | 0.348 | 1.213 | 0.163 | 0.450 | 1 | 1916 |
| REACTOME_RECEPTOR_MEDIAT<br>ED_MITOPHAGY                                                   | 11  | 0.514 | 1.213 | 0.215 | 0.449 | 1 | 4201 |
| REACTOME_UNFOLDED_PROTEI<br>N_RESPONSE_UPR_                                                | 87  | 0.322 | 1.210 | 0.143 | 0.455 | 1 | 1783 |
| REACTOME_ESTROGEN_STIMUL<br>ATED_SIGNALING_THROUGH_P<br>RKCZ                               | 6   | 0.613 | 1.209 | 0.247 | 0.455 | 1 | 4927 |
| REACTOME_REGULATED_PROTE<br>OLYSIS_OF_P75NTR                                               | 11  | 0.505 | 1.209 | 0.248 | 0.456 | 1 | 4    |
| REACTOME_ROBO_RECEPTORS_<br>BIND_AKAP5                                                     | 7   | 0.579 | 1.208 | 0.237 | 0.456 | 1 | 2206 |
| REACTOME_OXIDATIVE_STRESS<br>_INDUCED_SENESCENCE                                           | 72  | 0.334 | 1.208 | 0.165 | 0.455 | 1 | 3877 |
| REACTOME_RNA_POLYMERASE_<br>III_TRANSCRIPTION_INITIATION_<br>FROM_TYPE_3_PROMOTER          | 28  | 0.401 | 1.208 | 0.196 | 0.455 | 1 | 2381 |
| REACTOME_INTERLEUKIN_35_SI<br>GNALLING                                                     | 8   | 0.564 | 1.207 | 0.260 | 0.456 | 1 | 3168 |
| REACTOME_ERYTHROPOIETIN_A<br>CTIVATES_STAT5                                                | 6   | 0.615 | 1.207 | 0.246 | 0.455 | 1 | 255  |
| REACTOME_CALCINEURIN_ACTI<br>VATES_NFAT                                                    | 9   | 0.548 | 1.207 | 0.261 | 0.454 | 1 | 4224 |
| REACTOME_INACTIVATION_OF_<br>CDC42_AND_RAC1                                                | 6   | 0.606 | 1.206 | 0.264 | 0.454 | 1 | 2870 |
| REACTOME_HIGHLY_CALCIUM_<br>PERMEABLE_NICOTINIC_ACETYL<br>CHOLINE_RECEPTORS                | 4   | 0.665 | 1.204 | 0.252 | 0.457 | 1 | 236  |
| REACTOME_DARPP_32_EVENTS                                                                   | 19  | 0.440 | 1.201 | 0.213 | 0.462 | 1 | 3697 |
| REACTOME_THE_ROLE_OF_GTS<br>E1_IN_G2_M_PROGRESSION_AF<br>TER_G2_CHECKPOINT                 | 69  | 0.334 | 1.201 | 0.172 | 0.462 | 1 | 2159 |
| REACTOME_NR1H2_AND_NR1H<br>3_MEDIATED_SIGNALING                                            | 37  | 0.380 | 1.199 | 0.204 | 0.465 | 1 | 1765 |
| REACTOME_GOLGI_CISTERNAE_<br>PERICENTRIOLAR_STACK_REORG<br>ANIZATION                       | 14  | 0.489 | 1.198 | 0.221 | 0.467 | 1 | 3062 |
| REACTOME_RAS_SIGNALING_D<br>OWNSTREAM_OF_NF1_LOSS_O<br>F_FUNCTION_VARIANTS                 | 7   | 0.589 | 1.198 | 0.269 | 0.466 | 1 | 4927 |
| REACTOME_REMOVAL_OF_AMI<br>NOTERMINAL_PROPEPTIDES_FR<br>OM_GAMMA_CARBOXYLATED_<br>PROTEINS | 7   | 0.561 | 1.197 | 0.264 | 0.467 | 1 | 1175 |
| REACTOME_CELLULAR_SENESCE<br>NCE                                                           | 134 | 0.299 | 1.196 | 0.138 | 0.467 | 1 | 3641 |

|                                                                                                                                               |     |       |       |       |       |   |      |
|-----------------------------------------------------------------------------------------------------------------------------------------------|-----|-------|-------|-------|-------|---|------|
| REACTOME_TP53_REGULATES_TRANSCRIPTION_OF_CELL_DEATH_GENES                                                                                     | 37  | 0.379 | 1.196 | 0.194 | 0.466 | 1 | 2084 |
| REACTOME_DOWNREGULATION_OF_ERBB2_ERBB3_SIGNALING                                                                                              | 11  | 0.499 | 1.192 | 0.241 | 0.474 | 1 | 3842 |
| REACTOME_CALNEXIN_CALRETICULIN_CYCLE                                                                                                          | 26  | 0.400 | 1.192 | 0.239 | 0.474 | 1 | 4248 |
| REACTOME_NOSTRIN_MEDIATE_D_ENOS_TRAFFICKING                                                                                                   | 3   | 0.718 | 1.192 | 0.281 | 0.473 | 1 | 240  |
| REACTOME_SLC_MEDIATED_TRANSMEMBRANE_TRANSPORT                                                                                                 | 132 | 0.305 | 1.190 | 0.144 | 0.475 | 1 | 1793 |
| REACTOME_GAMMA_CARBOXYLATION_TRANSPORT_AND_AMINO_TERMINAL_CLEAVAGE_OF_PROTEINS                                                                | 8   | 0.560 | 1.188 | 0.271 | 0.480 | 1 | 1175 |
| REACTOME_HIGHLY_SODIUM_PERMEABLE_POSTSYNAPTIC_ACETYLCHOLINE_NICOTINIC_RECEPTORS                                                               | 2   | 0.796 | 1.186 | 0.259 | 0.482 | 1 | 189  |
| REACTOME_INTEGRATION_OF_POROVIRUS                                                                                                             | 9   | 0.529 | 1.185 | 0.271 | 0.484 | 1 | 3854 |
| REACTOME_HIGHLY_CALCIIUM_PERMEABLE_POSTSYNAPTIC_NICOTINIC_ACETYLCHOLINE_RECEPTORS                                                             | 4   | 0.665 | 1.184 | 0.280 | 0.485 | 1 | 236  |
| REACTOME_CD28_CO_STIMULATION                                                                                                                  | 28  | 0.403 | 1.180 | 0.232 | 0.493 | 1 | 3080 |
| REACTOME_INTERLEUKIN_9_SIGNALING                                                                                                              | 5   | 0.633 | 1.179 | 0.284 | 0.494 | 1 | 2771 |
| REACTOME_RHO_GTPASES_ACTIVATE_NADPH_OXIDASES                                                                                                  | 14  | 0.469 | 1.179 | 0.250 | 0.493 | 1 | 2887 |
| REACTOME_P75NTR_SIGNALS_VIA_NF_KB                                                                                                             | 15  | 0.458 | 1.178 | 0.254 | 0.495 | 1 | 3842 |
| REACTOME_CELLULAR_HEXOSE_TRANSPORT                                                                                                            | 12  | 0.486 | 1.176 | 0.273 | 0.499 | 1 | 1476 |
| REACTOME_TP53_REGULATES_TRANSCRIPTION_OF_SEVERAL_ADDITIONAL_CELL_DEATH_GENES_WHOSE_SPECIFIC_ROLES_IN_P53_DEPENDENT_APOPTOSIS_REMAIN_UNCERTAIN | 12  | 0.484 | 1.174 | 0.251 | 0.500 | 1 | 2084 |
| REACTOME_ACROSOME_REACTION_AND_SPERM_OOCYTE_MBRANE_BINDING                                                                                    | 1   | 0.877 | 1.174 | 0.234 | 0.500 | 1 | 1562 |
| REACTOME_NF_KB_IS_ACTIVATED_AND_SIGNALS_SURVIVAL                                                                                              | 12  | 0.483 | 1.172 | 0.277 | 0.504 | 1 | 4    |
| REACTOME_GLUCURONIDATION                                                                                                                      | 4   | 0.656 | 1.171 | 0.303 | 0.505 | 1 | 1222 |
| REACTOME_ER_QUALITY_CONTROL_COMPARTMENT_ERQC                                                                                                  | 21  | 0.423 | 1.171 | 0.274 | 0.504 | 1 | 4248 |
| REACTOME_UREA_CYCLE                                                                                                                           | 5   | 0.620 | 1.170 | 0.311 | 0.504 | 1 | 824  |
| REACTOME_O_LINKED_GLYCOSYLATION                                                                                                               | 61  | 0.332 | 1.170 | 0.213 | 0.504 | 1 | 2874 |

|                                                                                                   |     |       |       |       |       |   |      |
|---------------------------------------------------------------------------------------------------|-----|-------|-------|-------|-------|---|------|
| REACTOME_PYRIMIDINE_SALVAGE                                                                       | 8   | 0.528 | 1.169 | 0.288 | 0.504 | 1 | 1122 |
| REACTOME_PTK6_REGULATES_CELL_CYCLE                                                                | 6   | 0.579 | 1.168 | 0.295 | 0.507 | 1 | 1052 |
| REACTOME_GLYCOGEN_SYNTHESIS                                                                       | 13  | 0.481 | 1.167 | 0.282 | 0.507 | 1 | 3842 |
| REACTOME_DISEASES_OF_MITOTIC_CELL_CYCLE                                                           | 35  | 0.373 | 1.166 | 0.250 | 0.508 | 1 | 1433 |
| REACTOME_FGFR3_LIGAND_BINDING_AND_ACTIVATION                                                      | 4   | 0.658 | 1.163 | 0.309 | 0.513 | 1 | 1208 |
| REACTOME_SMOOTH_MUSCLE_CONTRACTION                                                                | 25  | 0.403 | 1.163 | 0.238 | 0.513 | 1 | 3067 |
| REACTOME_TRANSCRIPTIONAL_REGULATION_BY_RUNX3                                                      | 92  | 0.308 | 1.163 | 0.178 | 0.512 | 1 | 2466 |
| REACTOME_NEGATIVE_REGULATION_OF_NMDA_RECEPTOR_MEDIATED_NEURONAL_TRANSMISSION                      | 12  | 0.476 | 1.161 | 0.276 | 0.514 | 1 | 2027 |
| REACTOME_PLASMA_LIPOPROTEIN_CLEARANCE                                                             | 27  | 0.397 | 1.161 | 0.246 | 0.515 | 1 | 1372 |
| REACTOME_TRANSPORT_OF_VITAMINS_NUCLEOSIDES_AND_RELATED_MOLECULES                                  | 28  | 0.394 | 1.159 | 0.254 | 0.517 | 1 | 1636 |
| REACTOME_FRS_MEDIATED_FGFR1_SIGNALING                                                             | 11  | 0.497 | 1.157 | 0.290 | 0.520 | 1 | 4442 |
| REACTOME_SIGNALING_BY_FGFR2_IN_DISEASE                                                            | 28  | 0.396 | 1.157 | 0.251 | 0.519 | 1 | 2804 |
| REACTOME_DOWNSTREAM_SIGNAL_TRANSDUCTION                                                           | 28  | 0.390 | 1.157 | 0.258 | 0.519 | 1 | 2804 |
| REACTOME_CS_DS_DEGRADATION                                                                        | 9   | 0.517 | 1.157 | 0.297 | 0.518 | 1 | 1541 |
| REACTOME_BMAL1_CLOCK_NPAS2_ACTIVATES_CIRCADIAN_GENE_EXPRESSION                                    | 26  | 0.398 | 1.156 | 0.255 | 0.518 | 1 | 1695 |
| REACTOME_RUNX1_REGULATES_EXPRESSION_OF_COMPONENTS_OF_TIGHT_JUNCTIONS                              | 4   | 0.649 | 1.156 | 0.323 | 0.518 | 1 | 4464 |
| REACTOME_NUCLEOTIDE_BINDING_DOMAIN_LEUCINE_RICH_REPEAT_CONTAINING_RECEPTOR_NLR_SIGNALING_PATHWAYS | 47  | 0.349 | 1.156 | 0.234 | 0.517 | 1 | 2742 |
| REACTOME_METABOLISM_OF_NITRIC_OXIDE_NOS3_ACTIVATION_AND_REGULATION                                | 13  | 0.472 | 1.155 | 0.293 | 0.519 | 1 | 1167 |
| REACTOME_CYP2E1_REACTIONS                                                                         | 3   | 0.706 | 1.151 | 0.321 | 0.526 | 1 | 243  |
| REACTOME_SEMA4D_MEDIATED_INHIBITION_OF_CELL_ATTACHMENT_AND_MIGRATION                              | 8   | 0.525 | 1.151 | 0.293 | 0.525 | 1 | 2958 |
| REACTOME_NRIF_SIGNALS_CELL_DEATH_FROM_THE_NUCLEUS                                                 | 15  | 0.453 | 1.151 | 0.286 | 0.525 | 1 | 4    |
| REACTOME_INTRA_GOLGI_AND_RETROGRADE_GOLGI_TO_ER_TRAFFIC                                           | 183 | 0.278 | 1.148 | 0.173 | 0.530 | 1 | 2170 |

|                                                                                                         |     |       |       |       |       |   |      |
|---------------------------------------------------------------------------------------------------------|-----|-------|-------|-------|-------|---|------|
| REACTOME_PI_3K_CASCADE_FG<br>FR1                                                                        | 8   | 0.528 | 1.147 | 0.305 | 0.532 | 1 | 1997 |
| REACTOME_ERYTHROPOIETIN_A<br>CTIVATES_PHOSPHOINOSITIDE_<br>3_KINASE_PI3K_                               | 8   | 0.531 | 1.146 | 0.301 | 0.532 | 1 | 1470 |
| REACTOME_RAP1_SIGNALLING                                                                                | 13  | 0.459 | 1.145 | 0.306 | 0.533 | 1 | 3484 |
| REACTOME_INTRINSIC_PATHWA<br>Y_FOR_APOPTOSIS                                                            | 51  | 0.338 | 1.143 | 0.246 | 0.536 | 1 | 3264 |
| REACTOME_SIGNALING_BY_BRA<br>F_AND_RAF_FUSIONS                                                          | 57  | 0.329 | 1.143 | 0.231 | 0.536 | 1 | 3589 |
| REACTOME_ACTIVATION_OF_IR<br>F3_IRF7_MEDIATED_BY_TBK1_I<br>KK_EPSILON                                   | 15  | 0.447 | 1.143 | 0.303 | 0.535 | 1 | 2159 |
| REACTOME_AUTOPHAGY                                                                                      | 134 | 0.286 | 1.140 | 0.195 | 0.539 | 1 | 3259 |
| REACTOME_REGULATION_OF_F<br>OXO_TRANSCRIPTIONAL_ACTIVI<br>TY_BY_ACETYLATION                             | 10  | 0.499 | 1.139 | 0.321 | 0.541 | 1 | 1204 |
| REACTOME_PREVENTION_OF_P<br>HAGOSOMAL_LYSOSOMAL_FUSI<br>ON                                              | 9   | 0.508 | 1.136 | 0.330 | 0.548 | 1 | 2538 |
| REACTOME_SHC1_EVENTS_IN_E<br>RBB4_SIGNALING                                                             | 9   | 0.522 | 1.136 | 0.312 | 0.547 | 1 | 770  |
| REACTOME_CELLULAR_RESPON<br>SES_TO_EXTERNAL_STIMULI                                                     | 499 | 0.252 | 1.132 | 0.133 | 0.553 | 1 | 3038 |
| REACTOME_MAPK1_ERK2_ACTI<br>VATION                                                                      | 8   | 0.517 | 1.131 | 0.310 | 0.556 | 1 | 3513 |
| REACTOME_RHO_GTPASES_ACTI<br>VATE_FORMINS                                                               | 129 | 0.285 | 1.129 | 0.206 | 0.559 | 1 | 2870 |
| REACTOME_SIGNALLING_TO_P3<br>8_VIA_RIT_AND_RIN                                                          | 2   | 0.739 | 1.129 | 0.338 | 0.558 | 1 | 486  |
| REACTOME_RUNX1_INTERACTS<br>_WITH_CO_FACTORS_WHOSE_P<br>RECISE_EFFECT_ON_RUNX1_TAR<br>GETS_IS_NOT_KNOWN | 35  | 0.361 | 1.129 | 0.269 | 0.558 | 1 | 4020 |
| REACTOME_PI3K_AKT_ACTIVATI<br>ON                                                                        | 7   | 0.544 | 1.128 | 0.340 | 0.557 | 1 | 255  |
| REACTOME_NEGATIVE_FEEDBA<br>CK_REGULATION_OF_MAPK_PA<br>THWAY                                           | 6   | 0.558 | 1.126 | 0.354 | 0.561 | 1 | 3513 |
| REACTOME_ALPHA_PROTEIN_KI<br>NASE_1_SIGNALING_PATHWAY                                                   | 11  | 0.474 | 1.125 | 0.336 | 0.563 | 1 | 3849 |
| REACTOME_ROLE_OF_LAT2_NT<br>AL_LAB_ON_CALCIIUM_MOBILIZ<br>ATION                                         | 13  | 0.465 | 1.125 | 0.337 | 0.563 | 1 | 1652 |
| REACTOME_NEGATIVE_REGULA<br>TION_OF_ACTIVITY_OF_TFAP2_<br>AP_2_FAMILY_TRANSCRIPTION_<br>FACTORS         | 7   | 0.528 | 1.124 | 0.353 | 0.562 | 1 | 78   |
| REACTOME_INSULIN_PROCESSI<br>NG                                                                         | 22  | 0.392 | 1.123 | 0.305 | 0.564 | 1 | 3527 |

|                                                                                             |     |       |       |       |       |   |      |
|---------------------------------------------------------------------------------------------|-----|-------|-------|-------|-------|---|------|
| REACTOME_SENESCENCE_ASSOCIATED_SECRETORY_PHENOTYPE_SASP_                                    | 57  | 0.330 | 1.120 | 0.277 | 0.570 | 1 | 3842 |
| REACTOME_GLYCOGEN_BREAKDOWN_GLYCOGENOLYSIS_                                                 | 15  | 0.438 | 1.116 | 0.319 | 0.578 | 1 | 377  |
| REACTOME_G_ALPHA_Q_SIGNALING_EVENTS                                                         | 87  | 0.303 | 1.116 | 0.264 | 0.578 | 1 | 1263 |
| REACTOME_ANTI_INFLAMMATORY_RESPONSE_FAVOURING_LEISHMANIA_PARASITE_INFECTION                 | 58  | 0.320 | 1.114 | 0.277 | 0.580 | 1 | 3192 |
| REACTOME_ROLE_OF_ABL_IN_ROBO_SLIT_SIGNALING                                                 | 7   | 0.527 | 1.113 | 0.368 | 0.583 | 1 | 2324 |
| REACTOME_TYROSINE_CATABOLISM                                                                | 3   | 0.695 | 1.112 | 0.376 | 0.583 | 1 | 3543 |
| REACTOME_TOXICITY_OF_BOTULINUM_TOXIN_TYPE_D_BONT_D                                          | 3   | 0.672 | 1.109 | 0.377 | 0.589 | 1 | 4173 |
| REACTOME_RHO_GTPASES_ACTIVATE_KTN1                                                          | 11  | 0.468 | 1.106 | 0.336 | 0.594 | 1 | 3357 |
| REACTOME_THE_NLRP3_INFLAMMASOME                                                             | 10  | 0.477 | 1.105 | 0.339 | 0.596 | 1 | 2185 |
| REACTOME_SIGNALING_BY_NTRK2_TRKB_                                                           | 21  | 0.394 | 1.104 | 0.337 | 0.596 | 1 | 770  |
| REACTOME_SLC_TRANSPORTER_DISORDERS                                                          | 54  | 0.320 | 1.104 | 0.291 | 0.597 | 1 | 2107 |
| REACTOME_HCMV_INFECTION                                                                     | 96  | 0.289 | 1.102 | 0.286 | 0.599 | 1 | 2152 |
| REACTOME_THE_PHOTOTRANSDUCTION_CASCADE                                                      | 15  | 0.426 | 1.101 | 0.327 | 0.601 | 1 | 1257 |
| REACTOME_GENE_AND_PROTEIN_EXPRESSION_BY_JAK_STAT_SIGNALING_AFTER_INTERLEUKIN_12_STIMULATION | 31  | 0.358 | 1.100 | 0.327 | 0.601 | 1 | 4510 |
| REACTOME_ATF4_ACTIVATES_GENES_IN_RESPONSE_TO_ENDOPLASMIC_RETICULUM_STRESS                   | 26  | 0.378 | 1.099 | 0.330 | 0.602 | 1 | 792  |
| REACTOME_MAP3K8_TPL2_DEPENDENT_MAPK1_3_ACTIVATION                                           | 16  | 0.422 | 1.099 | 0.333 | 0.601 | 1 | 4551 |
| REACTOME_REGULATION_OF_RUNX1_EXPRESSION_AND_ACTIVITY                                        | 16  | 0.425 | 1.098 | 0.330 | 0.602 | 1 | 2397 |
| REACTOME_CRMP5_IN_SEMA3A_SIGNALING                                                          | 12  | 0.451 | 1.093 | 0.368 | 0.615 | 1 | 1228 |
| REACTOME_REDUCTION_OF_CYTOSOLIC_CA_LEVELS                                                   | 7   | 0.517 | 1.091 | 0.370 | 0.617 | 1 | 604  |
| REACTOME_FC_EPSILON_RECEPTOR_FCERI_SIGNALING                                                | 117 | 0.280 | 1.091 | 0.320 | 0.617 | 1 | 3067 |
| REACTOME_CELL_DEATH_SIGNALING_VIA_NRAGE_NRIF_AND_NADE                                       | 69  | 0.305 | 1.090 | 0.302 | 0.617 | 1 | 615  |
| REACTOME_ERBB2_ACTIVATES_PTK6_SIGNALING                                                     | 6   | 0.550 | 1.090 | 0.385 | 0.616 | 1 | 695  |
| REACTOME_MATURATION_OF_SPIKE_PROTEIN                                                        | 5   | 0.581 | 1.089 | 0.388 | 0.617 | 1 | 4107 |

|                                                                            |     |       |       |       |       |   |      |
|----------------------------------------------------------------------------|-----|-------|-------|-------|-------|---|------|
| REACTOME_PI3K_EVENTS_IN_ERBB2_SIGNALING                                    | 8   | 0.495 | 1.086 | 0.360 | 0.625 | 1 | 695  |
| REACTOME_KERATAN_SULFATE_KERATIN_METABOLISM                                | 23  | 0.377 | 1.086 | 0.351 | 0.624 | 1 | 2876 |
| REACTOME_REGULATION_OF_FZD_BY_UBIQUITINATION                               | 15  | 0.427 | 1.085 | 0.368 | 0.623 | 1 | 2159 |
| REACTOME_REGULATION_OF_P107_P130_GENE_TRANSCRIPTION                        | 60  | 0.313 | 1.084 | 0.320 | 0.625 | 1 | 2605 |
| REACTOME_INTERACTIONS_OF_VPR_WITH_HOST_CELLULAR_PROTEINS                   | 37  | 0.340 | 1.083 | 0.324 | 0.627 | 1 | 4177 |
| REACTOME_ERBB2_REGULATES_CELL_MOTILITY                                     | 8   | 0.511 | 1.082 | 0.392 | 0.627 | 1 | 695  |
| REACTOME_SIGNALING_BY_NOTCH2                                               | 28  | 0.365 | 1.081 | 0.360 | 0.628 | 1 | 472  |
| REACTOME_SEMA3A_PLEXIN_REPULSION_SIGNALING_BY_INHIBITING_INTEGRIN_ADHESION | 12  | 0.444 | 1.081 | 0.364 | 0.628 | 1 | 2958 |
| REACTOME_REACTIONS_SPECIFIC_TO_THE_COMPLEX_N_GLYCAN_SYNTHESIS_PATHWAY      | 5   | 0.567 | 1.079 | 0.418 | 0.632 | 1 | 2489 |
| REACTOME_VXPX_CARGO_TARGETING_TO_CILIUM                                    | 17  | 0.407 | 1.078 | 0.374 | 0.633 | 1 | 3269 |
| REACTOME_NETRIN_1_SIGNALING                                                | 36  | 0.343 | 1.078 | 0.336 | 0.632 | 1 | 3067 |
| REACTOME_GLYCOLYSIS                                                        | 62  | 0.308 | 1.076 | 0.314 | 0.635 | 1 | 2240 |
| REACTOME_GLYCOGEN_METABOLISM                                               | 24  | 0.379 | 1.076 | 0.375 | 0.634 | 1 | 1171 |
| REACTOME_TCR_SIGNALING                                                     | 94  | 0.283 | 1.075 | 0.320 | 0.634 | 1 | 3067 |
| REACTOME_REGULATION_OF_TP53_ACTIVITY_THROUGH_ACETYLATION                   | 30  | 0.354 | 1.075 | 0.336 | 0.633 | 1 | 5067 |
| REACTOME_SIGNALING_BY_WNT                                                  | 221 | 0.255 | 1.075 | 0.282 | 0.634 | 1 | 1710 |
| REACTOME_2_LTR_CIRCLE_FORMATION                                            | 7   | 0.515 | 1.073 | 0.399 | 0.635 | 1 | 3854 |
| REACTOME_DOWNSTREAM_SIGNALING_OF_ACTIVATED_FGFR1                           | 15  | 0.414 | 1.073 | 0.362 | 0.634 | 1 | 2804 |
| REACTOME_PTK6_EXPRESSION                                                   | 5   | 0.576 | 1.072 | 0.417 | 0.636 | 1 | 1852 |
| REACTOME_HORMONE_LIGAND_BINDING_RECEPTORS                                  | 1   | 0.809 | 1.070 | 0.398 | 0.640 | 1 | 2429 |
| REACTOME_INTRAFLAGELLAR_TRANSPORT                                          | 48  | 0.318 | 1.069 | 0.367 | 0.641 | 1 | 910  |
| REACTOME_RNF_MUTANTS_SHOW_ENHANCED_WNT_SIGNALING_AND_PROLIFERATION         | 6   | 0.532 | 1.068 | 0.407 | 0.642 | 1 | 990  |
| REACTOME_MET_ACTIVATES_PTEN                                                | 3   | 0.651 | 1.068 | 0.437 | 0.642 | 1 | 4442 |
| REACTOME_PLATELET_CALCIIUM_HOMEOSTASIS                                     | 17  | 0.393 | 1.067 | 0.365 | 0.642 | 1 | 2373 |
| REACTOME_INTERLEUKIN_12_SIGNALING                                          | 36  | 0.338 | 1.067 | 0.355 | 0.641 | 1 | 4017 |

|                                                                        |     |       |       |       |       |   |      |
|------------------------------------------------------------------------|-----|-------|-------|-------|-------|---|------|
| REACTOME_INTERLEUKIN_37_SIGNALING                                      | 14  | 0.420 | 1.067 | 0.388 | 0.641 | 1 | 3283 |
| REACTOME_MISCELLANEOUS_TRANSPORT_AND_BINDING_EVENTS                    | 21  | 0.374 | 1.067 | 0.367 | 0.641 | 1 | 2664 |
| REACTOME_SIGNALING_BY_HIPPO                                            | 19  | 0.395 | 1.064 | 0.369 | 0.646 | 1 | 2944 |
| REACTOME_ARYL_HYDROCARBON_RECEPTOR_SIGNALING                           | 6   | 0.526 | 1.064 | 0.387 | 0.645 | 1 | 2050 |
| REACTOME_SIGNALING_BY_ERBB2_IN_CANCER                                  | 18  | 0.404 | 1.060 | 0.384 | 0.653 | 1 | 1170 |
| REACTOME_SYNTHESIS_OF_IP2_IP_AND_INS_IN_THE_CYTOSOL                    | 11  | 0.456 | 1.060 | 0.373 | 0.652 | 1 | 2901 |
| REACTOME_MUCOPOLYSACCHARIDOSES                                         | 11  | 0.442 | 1.059 | 0.378 | 0.652 | 1 | 1498 |
| REACTOME_PI_METABOLISM                                                 | 69  | 0.297 | 1.059 | 0.378 | 0.652 | 1 | 2725 |
| REACTOME_ACYL_CHAIN_REMODELING_OF_PG                                   | 6   | 0.527 | 1.056 | 0.424 | 0.658 | 1 | 2191 |
| REACTOME_RHO_GTPASES_ACTIVATE_RHOTEKIN_AND_RHOPHILINS                  | 8   | 0.473 | 1.054 | 0.403 | 0.660 | 1 | 4089 |
| REACTOME_PHASE_2_PLATEAU_PHASE                                         | 9   | 0.470 | 1.054 | 0.427 | 0.661 | 1 | 2906 |
| REACTOME_TRANSCRIPTIONAL_REGULATION_BY_RUNX2                           | 101 | 0.278 | 1.053 | 0.336 | 0.660 | 1 | 3249 |
| REACTOME_NEPHRIN_FAMILY_INTERACTIONS                                   | 16  | 0.401 | 1.051 | 0.403 | 0.665 | 1 | 3589 |
| REACTOME_AMINO_ACIDS_REGULATE_MTORC1                                   | 50  | 0.311 | 1.051 | 0.367 | 0.665 | 1 | 3038 |
| REACTOME_AMINO_ACID_TRANSPORT_ACROSS_THE_PLASMA_MEMBRANE               | 21  | 0.375 | 1.050 | 0.400 | 0.665 | 1 | 3233 |
| REACTOME_RAB_REGULATION_OF_TRAFFICKING                                 | 111 | 0.270 | 1.048 | 0.353 | 0.667 | 1 | 3679 |
| REACTOME_INTERFERON_SIGNALING                                          | 142 | 0.265 | 1.048 | 0.347 | 0.668 | 1 | 3688 |
| REACTOME_LTC4_CYSLTR_MEDIATED_IL4_PRODUCTION                           | 2   | 0.699 | 1.047 | 0.461 | 0.668 | 1 | 3827 |
| REACTOME_ABORTIVE_ELONGATION_OF_HIV_1_TRANSCRIPT_IN_THE_ABSENCE_OF_TAT | 23  | 0.370 | 1.046 | 0.398 | 0.671 | 1 | 3778 |
| REACTOME_PRE_NOTCH_EXPRESSION_AND_PROCESSING                           | 57  | 0.306 | 1.044 | 0.400 | 0.674 | 1 | 2126 |
| REACTOME_PERK_REGULATES_GENE_EXPRESSION                                | 31  | 0.340 | 1.042 | 0.394 | 0.676 | 1 | 792  |
| REACTOME_SRP_DEPENDENT_COTRANSLATIONAL_PROTEIN_TARGETING_TO_MEMBRANE   | 108 | 0.267 | 1.040 | 0.379 | 0.681 | 1 | 5937 |
| REACTOME_FGFR2B_LIGAND_BINDING_AND_ACTIVATION                          | 3   | 0.635 | 1.039 | 0.495 | 0.682 | 1 | 3003 |
| REACTOME_IRAK2_MEDIATED_ACTIVATION_OF_TAK1_COMPLEX                     | 10  | 0.455 | 1.038 | 0.409 | 0.684 | 1 | 4190 |

|                                                                                  |    |       |       |       |       |   |      |
|----------------------------------------------------------------------------------|----|-------|-------|-------|-------|---|------|
| REACTOME_INTERLEUKIN_15_SIGNALING                                                | 10 | 0.446 | 1.036 | 0.406 | 0.686 | 1 | 3687 |
| REACTOME_PEPTIDE_HORMONE_BIOSYNTHESIS                                            | 3  | 0.644 | 1.035 | 0.481 | 0.688 | 1 | 2127 |
| REACTOME_ATTACHMENT_OF_GPI_ANCHOR_TO_UPAR                                        | 7  | 0.499 | 1.035 | 0.438 | 0.687 | 1 | 3455 |
| REACTOME_PROTON_COUPLED_MONOCARBOXYLATE_TRANSPORT                                | 3  | 0.624 | 1.034 | 0.470 | 0.689 | 1 | 4784 |
| REACTOME_FCGR_ACTIVATION                                                         | 5  | 0.553 | 1.033 | 0.470 | 0.689 | 1 | 484  |
| REACTOME_ACTIVATION_OF_KAINATE_RECEPTORS_UPON_GLUTAMATE_BINDING                  | 15 | 0.406 | 1.032 | 0.407 | 0.690 | 1 | 2618 |
| REACTOME_TGF_BETA_RECEPTOR_SIGNALING_IN_EMT_EPITHELIAL_TO_MESENCHYMAL_TRANSITION | 16 | 0.402 | 1.031 | 0.432 | 0.691 | 1 | 4089 |
| REACTOME_FGFR1_MUTANT_RECEPTOR_ACTIVATION                                        | 22 | 0.371 | 1.031 | 0.425 | 0.690 | 1 | 5475 |
| REACTOME_TRP_CHANNELS                                                            | 13 | 0.419 | 1.029 | 0.435 | 0.693 | 1 | 1969 |
| REACTOME_ADORA2B_MEDIATED_ANTI_INFLAMMATORY_CYTOKINES_PRODUCTION                 | 37 | 0.320 | 1.025 | 0.430 | 0.703 | 1 | 3050 |
| REACTOME_ZINC_EFFLUX_AND_COMPARTMENTALIZATION_BY_THE_SLC30_FAMILY                | 6  | 0.516 | 1.024 | 0.443 | 0.702 | 1 | 3880 |
| REACTOME_SIGNALING_BY_NOTCH1_HD_DOMAIN_MUTANTS_IN_CANCER                         | 14 | 0.414 | 1.021 | 0.427 | 0.708 | 1 | 2159 |
| REACTOME_INOSITOL_PHOSPHATE_METABOLISM                                           | 36 | 0.318 | 1.021 | 0.419 | 0.709 | 1 | 3487 |
| REACTOME_ACTIVATION_OF_RAS_IN_B_CELLS                                            | 3  | 0.612 | 1.019 | 0.482 | 0.711 | 1 | 4927 |
| REACTOME_PREGNENOLONE_BIOSYNTHESIS                                               | 9  | 0.464 | 1.019 | 0.462 | 0.711 | 1 | 530  |
| REACTOME_RUNX1_REGULATES_TRANSCRIPTION_OF_GENES_INVOLVED_IN_BCR_SIGNALING        | 4  | 0.574 | 1.018 | 0.479 | 0.711 | 1 | 3249 |
| REACTOME_SIGNALING_BY_NOTCH1_PEST_DOMAIN_MUTANTS_IN_CANCER                       | 56 | 0.293 | 1.018 | 0.424 | 0.711 | 1 | 2159 |
| REACTOME_PHENYLALANINE_METABOLISM                                                | 4  | 0.573 | 1.017 | 0.485 | 0.711 | 1 | 2045 |
| REACTOME_PI3K_EVENTS_IN_EBFB4_SIGNALING                                          | 5  | 0.539 | 1.017 | 0.492 | 0.711 | 1 | 695  |
| REACTOME_SODIUM_COUPLED_PHOSPHATE_COTRANSPORTERS                                 | 2  | 0.692 | 1.016 | 0.489 | 0.711 | 1 | 1525 |
| REACTOME_WAX_AND_PLASMALOGEN_BIOSYNTHESIS                                        | 4  | 0.561 | 1.016 | 0.492 | 0.711 | 1 | 753  |
| REACTOME_SODIUM_PROTON_EXCHANGERS                                                | 5  | 0.526 | 1.010 | 0.492 | 0.723 | 1 | 4045 |

|                                                                        |    |       |       |       |       |   |      |
|------------------------------------------------------------------------|----|-------|-------|-------|-------|---|------|
| REACTOME_SIGNALING_BY_FGF<br>R2_III_A_TM                               | 16 | 0.386 | 1.009 | 0.445 | 0.725 | 1 | 2715 |
| REACTOME_P75_NTR_RECEPTOR_MEDIATED_SIGNALLING                          | 87 | 0.273 | 1.008 | 0.420 | 0.725 | 1 | 3450 |
| REACTOME_OPSINS                                                        | 1  | 0.757 | 1.004 | 0.525 | 0.734 | 1 | 3093 |
| REACTOME_COMPETING_ENDOGENOUS_RNAS_CERNAS_REGULATE_PTEN_TRANSLATION    | 8  | 0.455 | 1.004 | 0.459 | 0.733 | 1 | 1061 |
| REACTOME_GLUCAGON_LIKE_PEPTIDE_1_GLP1_REGULATES_INSULIN_SECRETION      | 22 | 0.360 | 1.004 | 0.446 | 0.732 | 1 | 2618 |
| REACTOME_CYTOSOLIC_SULFONATION_OF_SMALL_MOLECULES                      | 15 | 0.388 | 1.004 | 0.437 | 0.731 | 1 | 926  |
| REACTOME_GRB2_EVENTS_IN_ERBB2_SIGNALING                                | 9  | 0.450 | 1.001 | 0.464 | 0.737 | 1 | 695  |
| REACTOME_INWARDLY_RECTIFYING_K_CHANNELS                                | 13 | 0.407 | 0.999 | 0.464 | 0.740 | 1 | 266  |
| REACTOME_THROMBOXANE_SIGNALLING_THROUGH_TP_RECEPTOR                    | 11 | 0.421 | 0.998 | 0.466 | 0.742 | 1 | 1425 |
| REACTOME_SUMOYLATION_OF_DNA_METHYLATION_PROTEINS                       | 16 | 0.379 | 0.997 | 0.444 | 0.742 | 1 | 3853 |
| REACTOME_PHOSPHORYLATION_OF_EMI1                                       | 6  | 0.499 | 0.993 | 0.508 | 0.751 | 1 | 4176 |
| REACTOME_G_BETA_GAMMA_SIGNALING_THROUGH_PI3K_GAMMA                     | 12 | 0.415 | 0.989 | 0.481 | 0.759 | 1 | 3080 |
| REACTOME_PROTEIN_UBIQUITINATION                                        | 65 | 0.281 | 0.989 | 0.469 | 0.757 | 1 | 4659 |
| REACTOME_CHK1_CHK2_CDS1_MEDIATED_INACTIVATION_OF_CYCLIN_B_CDK1_COMPLEX | 13 | 0.398 | 0.989 | 0.488 | 0.757 | 1 | 3484 |
| REACTOME_ERYTHROPOIETIN_ACTIVATES_PHOSPHOLIPASE_C_GAMMA_PLCG           | 6  | 0.486 | 0.987 | 0.503 | 0.760 | 1 | 3168 |
| REACTOME_PROCESSING_AND_ACTIVATION_OF_SUMO                             | 10 | 0.424 | 0.987 | 0.470 | 0.760 | 1 | 4753 |
| REACTOME_G_ALPHA_S_SIGNALING_EVENTS                                    | 51 | 0.292 | 0.986 | 0.489 | 0.760 | 1 | 2618 |
| REACTOME_CD22_MEDIATED_BCR_REGULATION                                  | 2  | 0.659 | 0.985 | 0.551 | 0.762 | 1 | 4340 |
| REACTOME_DOWNREGULATION_OF_ERBB2_SIGNALING                             | 21 | 0.349 | 0.982 | 0.492 | 0.768 | 1 | 2159 |
| REACTOME_ADP_SIGNALLING_THROUGH_P2Y_PURINOCEPTOR_1                     | 11 | 0.418 | 0.981 | 0.482 | 0.768 | 1 | 2618 |
| REACTOME_ACTIVATION_OF_NIMA_KINASES_NEK9_NEK6_NEK7                     | 7  | 0.466 | 0.981 | 0.507 | 0.768 | 1 | 4176 |
| REACTOME_GLUCOCORTICOID_BIOSYNTHESIS                                   | 2  | 0.654 | 0.980 | 0.561 | 0.768 | 1 | 4197 |
| REACTOME_TRYPTOPHAN_CATABOLISM                                         | 8  | 0.452 | 0.979 | 0.501 | 0.770 | 1 | 3635 |

|                                                                                                        |     |       |       |       |       |   |      |
|--------------------------------------------------------------------------------------------------------|-----|-------|-------|-------|-------|---|------|
| REACTOME_REGULATION_OF_P<br>TEN_MRNA_TRANSLATION                                                       | 9   | 0.440 | 0.978 | 0.505 | 0.770 | 1 | 1061 |
| REACTOME_DISEASES_OF_CARB<br>OHYDRATE_METABOLISM                                                       | 27  | 0.328 | 0.978 | 0.491 | 0.770 | 1 | 1498 |
| REACTOME_ORGANIC_CATION_<br>ANION_ZWITTERION_TRANSPOR<br>T                                             | 6   | 0.483 | 0.977 | 0.506 | 0.770 | 1 | 121  |
| REACTOME_RUNX1_REGULATES<br>_ESTROGEN_RECEPTOR_MEDIAT<br>ED_TRANSCRIPTION                              | 5   | 0.511 | 0.977 | 0.510 | 0.769 | 1 | 3249 |
| REACTOME_JNK_C_JUN_KINASE<br>S_PHOSPHORYLATION_AND_AC<br>TIVATION_MEDIATED_BY_ACTIV<br>ATED_HUMAN_TAK1 | 21  | 0.343 | 0.977 | 0.480 | 0.768 | 1 | 3849 |
| REACTOME_OTHER_INTERLEUKI<br>N_SIGNALING                                                               | 16  | 0.375 | 0.975 | 0.493 | 0.772 | 1 | 3528 |
| REACTOME_TP53_REGULATES_T<br>RANSRIPTION_OF_DEATH_REC<br>EPTORS_AND_LIGANDS                            | 10  | 0.431 | 0.975 | 0.513 | 0.772 | 1 | 2084 |
| REACTOME_SIGNALING_BY_NO<br>TCH                                                                        | 166 | 0.239 | 0.973 | 0.521 | 0.774 | 1 | 2163 |
| REACTOME_SYNTHESIS_OF_IP3_<br>AND_IP4_IN_THE_CYTOSOL                                                   | 20  | 0.347 | 0.973 | 0.498 | 0.774 | 1 | 821  |
| REACTOME_PTK6_REGULATES_P<br>ROTEINS_INVOLVED_IN_RNA_P<br>ROCESSING                                    | 4   | 0.540 | 0.972 | 0.548 | 0.774 | 1 | 3521 |
| REACTOME_NOTCH4_INTRACEL<br>LULAR_DOMAIN_REGULATES_T<br>RANSRIPTION                                    | 17  | 0.362 | 0.972 | 0.478 | 0.773 | 1 | 4374 |
| REACTOME_PHASE_II_CONJUGA<br>TION_OF_COMPOUNDS                                                         | 51  | 0.285 | 0.968 | 0.498 | 0.782 | 1 | 1419 |
| REACTOME_REGULATION_OF_KI<br>T_SIGNALING                                                               | 15  | 0.390 | 0.967 | 0.505 | 0.782 | 1 | 1580 |
| REACTOME_INTERFERON_ALPH<br>A_BETA_SIGNALING                                                           | 47  | 0.287 | 0.965 | 0.499 | 0.785 | 1 | 1150 |
| REACTOME_TRANSCRIPTIONAL_<br>REGULATION_BY_MECP2                                                       | 46  | 0.296 | 0.965 | 0.522 | 0.784 | 1 | 1146 |
| REACTOME_ORGANIC_CATION_<br>TRANSPORT                                                                  | 6   | 0.483 | 0.965 | 0.546 | 0.784 | 1 | 121  |
| REACTOME_SMALL_INTERFERIN<br>G_RNA_SIRNA_BIOGENESIS                                                    | 9   | 0.435 | 0.964 | 0.506 | 0.784 | 1 | 195  |
| REACTOME_FGFR2_ALTERNATIV<br>E_SPLICING                                                                | 26  | 0.325 | 0.961 | 0.509 | 0.791 | 1 | 4379 |
| REACTOME_NUCLEOTIDE_SALV<br>AGE                                                                        | 19  | 0.356 | 0.959 | 0.515 | 0.793 | 1 | 3878 |
| REACTOME_SIGNALING_BY_ERB<br>B2                                                                        | 41  | 0.299 | 0.957 | 0.507 | 0.798 | 1 | 1170 |
| REACTOME_DISASSEMBLY_OF_T<br>HE_DESTRUCTION_COMPLEX_A<br>ND_RECRUITMENT_OF_AXIN_T<br>O_THE_MEMBRANE    | 26  | 0.326 | 0.957 | 0.490 | 0.797 | 1 | 267  |

|                                                                                      |     |       |       |       |       |   |      |
|--------------------------------------------------------------------------------------|-----|-------|-------|-------|-------|---|------|
| REACTOME_METABOLISM_OF_ANGIOTENSINOGEN_TO_ANGIOTENSINS                               | 7   | 0.462 | 0.953 | 0.537 | 0.803 | 1 | 2765 |
| REACTOME_SIGNALING_BY_SCF_KIT                                                        | 38  | 0.299 | 0.953 | 0.537 | 0.804 | 1 | 3235 |
| REACTOME_INSERTION_OF_TAIL_ANCHORED_PROTEINS_INTO_THE_ENDOPLASMIC_RETICULUM_MEMBRANE | 21  | 0.340 | 0.951 | 0.530 | 0.806 | 1 | 2256 |
| REACTOME_HIV_LIFE_CYCLE                                                              | 144 | 0.237 | 0.949 | 0.578 | 0.809 | 1 | 3870 |
| REACTOME_PROTEIN_REPAIR                                                              | 6   | 0.487 | 0.949 | 0.564 | 0.809 | 1 | 4278 |
| REACTOME_SUMOYLATION_OF_RNA_BINDING_PROTEINS                                         | 47  | 0.289 | 0.947 | 0.545 | 0.811 | 1 | 4177 |
| REACTOME_RUNX1_REGULATES_TRANSCRIPTION_OF_GENES_INVOLVED_IN_INTERLEUKIN_SIGNALING    | 3   | 0.579 | 0.946 | 0.577 | 0.812 | 1 | 3249 |
| REACTOME_TRANSCRIPTIONAL_ACTIVATION_OF_MITOCHONDRIAL_BIOGENESIS                      | 51  | 0.275 | 0.943 | 0.587 | 0.819 | 1 | 3542 |
| REACTOME_PROLACTIN_RECEPTOR_SIGNALING                                                | 10  | 0.410 | 0.942 | 0.557 | 0.819 | 1 | 4551 |
| REACTOME_SIGNALING_BY_MEMBRANE_TETHERED_FUSIONS_OF_PDGFRA_OR_PDGFRB                  | 3   | 0.564 | 0.942 | 0.591 | 0.818 | 1 | 2586 |
| REACTOME_ABACAVIR_METABOLISM                                                         | 4   | 0.525 | 0.942 | 0.586 | 0.817 | 1 | 3236 |
| REACTOME_ASPARTATE_AND_ASPARAGINE_METABOLISM                                         | 6   | 0.469 | 0.941 | 0.539 | 0.818 | 1 | 364  |
| REACTOME_FOXO_MEDIATED_TRANSCRIPTION_OF_CELL_DEATH_GENES                             | 16  | 0.359 | 0.941 | 0.545 | 0.818 | 1 | 1452 |
| REACTOME_NOTCH3_INTRACELLULAR_DOMAIN_REGULATES_TRANSCRIPTION                         | 19  | 0.347 | 0.939 | 0.526 | 0.821 | 1 | 4374 |
| REACTOME_REGULATION_OF_TP53_ACTIVITY_THROUGH_ASSOCIATION_WITH_CO_FACTORS             | 12  | 0.386 | 0.938 | 0.540 | 0.821 | 1 | 2084 |
| REACTOME_SIGNALING_BY_FGF_R1_IN_DISEASE                                              | 28  | 0.313 | 0.938 | 0.550 | 0.821 | 1 | 5475 |
| REACTOME_PROSTACYCLIN_SIGNALING_THROUGH_PROSTACYCLIN_RECEPTOR                        | 8   | 0.433 | 0.937 | 0.562 | 0.822 | 1 | 2618 |
| REACTOME_AKT_PHOSPHORYLATES_TARGETS_IN_THE_CYTOSOL                                   | 14  | 0.365 | 0.937 | 0.513 | 0.821 | 1 | 4296 |
| REACTOME_EICOSANOIDS                                                                 | 1   | 0.703 | 0.936 | 0.594 | 0.822 | 1 | 3774 |
| REACTOME_CONSTITUTIVE_SIGNALING_BY_OVEREXPRESSED_ERBB2                               | 11  | 0.403 | 0.935 | 0.555 | 0.823 | 1 | 4118 |
| REACTOME_RAB_GEF_EXCHANGE_GTP_FOR_GDP_ON_RABS                                        | 82  | 0.253 | 0.932 | 0.595 | 0.827 | 1 | 4266 |

|                                                                                        |    |       |       |       |       |   |      |
|----------------------------------------------------------------------------------------|----|-------|-------|-------|-------|---|------|
| REACTOME_NOD1_2_SIGNALING_PATHWAY                                                      | 35 | 0.295 | 0.929 | 0.579 | 0.833 | 1 | 2742 |
| REACTOME_TRANS_GOLGI_NETWORK_VESICLE_BUDDING                                           | 68 | 0.256 | 0.929 | 0.590 | 0.833 | 1 | 4144 |
| REACTOME_INTERFERON_GAMMA_SIGNALING                                                    | 57 | 0.269 | 0.928 | 0.589 | 0.834 | 1 | 3533 |
| REACTOME_NOTCH1_INTRACELLULAR_DOMAIN_REGULATES_TRANSCRIPTION                           | 45 | 0.282 | 0.927 | 0.579 | 0.835 | 1 | 2159 |
| REACTOME_G_BETA_GAMMA_SIGNALING_THROUGH_CDC42                                          | 9  | 0.416 | 0.923 | 0.557 | 0.842 | 1 | 3067 |
| REACTOME_TNF_RECEPTOR_SUPERFAMILY_TNFSF_MEMBERS_MEDIATING_NON_CANONICAL_TNF_KB_PATHWAY | 8  | 0.427 | 0.921 | 0.586 | 0.847 | 1 | 3185 |
| REACTOME_GABA_B_RECEPTOR_ACTIVATION                                                    | 19 | 0.341 | 0.917 | 0.586 | 0.853 | 1 | 266  |
| REACTOME_ANTIVIRAL_MECHANISM_BY_IFN_STIMULATED_GENES                                   | 74 | 0.253 | 0.917 | 0.624 | 0.852 | 1 | 3870 |
| REACTOME_SIGNALING_BY_NOTCH1                                                           | 66 | 0.258 | 0.915 | 0.619 | 0.855 | 1 | 1291 |
| REACTOME_N_GLYCAN_TRIMMING_IN_THE_ER_AND_CALNEXIN_CALRETICULIN_CYCLE                   | 35 | 0.293 | 0.915 | 0.577 | 0.854 | 1 | 3899 |
| REACTOME_MET_RECEPTOR_RECYCLING                                                        | 7  | 0.442 | 0.913 | 0.571 | 0.858 | 1 | 3687 |
| REACTOME_MECP2_REGULATES_TRANSCRIPTION_FACTORS                                         | 3  | 0.554 | 0.913 | 0.625 | 0.857 | 1 | 5367 |
| REACTOME_BUDDING_AND_MATURATION_OF_HIV_VIRION                                          | 28 | 0.304 | 0.910 | 0.596 | 0.861 | 1 | 4257 |
| REACTOME_IKK_COMPLEX_RECRUITMENT_MEDIATED_BY_RIP1                                      | 21 | 0.322 | 0.909 | 0.605 | 0.862 | 1 | 3094 |
| REACTOME_ROLE_OF_SECOND_MESSENGERS_IN_NETRIN_1_SIGNALING                               | 3  | 0.563 | 0.909 | 0.647 | 0.862 | 1 | 1754 |
| REACTOME_FORMATION_OF_RNA_POL_II_ELONGATION_COMPLEX                                    | 56 | 0.266 | 0.909 | 0.596 | 0.861 | 1 | 3815 |
| REACTOME_BETA_CATENIN_PHOSPHORYLATION_CASCADE                                          | 16 | 0.346 | 0.908 | 0.577 | 0.861 | 1 | 4060 |
| REACTOME_TRANSPORT_OF_THE_SLBP_DEPENDANT_MATURE_MRNA                                   | 36 | 0.283 | 0.908 | 0.619 | 0.861 | 1 | 4377 |
| REACTOME_NRCAM_INTERACTIONS                                                            | 6  | 0.455 | 0.907 | 0.603 | 0.862 | 1 | 2027 |
| REACTOME_ANTIGEN_PRESENTATION_FOLDING_ASSEMBLY_AND_PEPTIDE_LOADING_OF_CLASS_I_MHC      | 24 | 0.310 | 0.906 | 0.594 | 0.862 | 1 | 1068 |
| REACTOME_BH3_ONLY_PROTEINS_ASSOCIATE_WITH_AND_INA                                      | 9  | 0.401 | 0.905 | 0.592 | 0.864 | 1 | 704  |

|                                                                              |     |       |       |       |       |   |      |
|------------------------------------------------------------------------------|-----|-------|-------|-------|-------|---|------|
| ACTIVATE_ANTI_APOPTOTIC_BCL_2_MEMBERS                                        |     |       |       |       |       |   |      |
| REACTOME_CREB1_PHOSPHORYLATION_THROUGH_THE_ACTIVATION_OF_ADENYLATE_CYCLASE   | 8   | 0.413 | 0.903 | 0.588 | 0.866 | 1 | 779  |
| REACTOME_SIGNAL_AMPLIFICATION                                                | 16  | 0.338 | 0.902 | 0.602 | 0.868 | 1 | 3050 |
| REACTOME_HIV_ELONGATION_ARREST_AND_RECOVERY                                  | 32  | 0.297 | 0.901 | 0.620 | 0.868 | 1 | 4042 |
| REACTOME_CELLULAR_RESPONSE_TO_HYPOXIA                                        | 70  | 0.252 | 0.900 | 0.659 | 0.870 | 1 | 3159 |
| REACTOME_TERMINATION_OF_O_GLYCAN_BIOSYNTHESIS                                | 8   | 0.420 | 0.894 | 0.605 | 0.882 | 1 | 2813 |
| REACTOME_TRANSCRIPTIONAL_REGULATION_OF_GRANULOPOIESIS                        | 35  | 0.283 | 0.893 | 0.625 | 0.882 | 1 | 1978 |
| REACTOME_G0_AND_EARLY_G1                                                     | 26  | 0.301 | 0.893 | 0.623 | 0.882 | 1 | 2647 |
| REACTOME_PURINE_RIBONUCLEOSIDE_MONOPHOSPHATE_BIOSYNTHESIS                    | 12  | 0.364 | 0.892 | 0.608 | 0.882 | 1 | 676  |
| REACTOME_GLUCOSE_METABOLISM                                                  | 77  | 0.250 | 0.890 | 0.668 | 0.886 | 1 | 3995 |
| REACTOME_RUNX3_REGULATES_WNT_SIGNALING                                       | 8   | 0.406 | 0.889 | 0.607 | 0.886 | 1 | 2079 |
| REACTOME_KILLING_MECHANISMS                                                  | 9   | 0.396 | 0.888 | 0.627 | 0.888 | 1 | 2419 |
| REACTOME_TRANSCRIPTIONAL_REGULATION_BY_TP53                                  | 343 | 0.203 | 0.887 | 0.803 | 0.889 | 1 | 3232 |
| REACTOME_RUNX3_REGULATES_NOTCH_SIGNALING                                     | 14  | 0.349 | 0.884 | 0.633 | 0.895 | 1 | 4374 |
| REACTOME_TRANSPORT_OF_INORGANIC_CATIONS_ANIONS_AND_AMINO_ACIDS_OLIGOPEPTIDES | 53  | 0.258 | 0.883 | 0.667 | 0.895 | 1 | 3233 |
| REACTOME_ACTIVATION_OF_PUMA_AND_TRANSLOCATION_TO_MITOCHONDRIA                | 8   | 0.405 | 0.882 | 0.621 | 0.895 | 1 | 211  |
| REACTOME_AMINE_LIGAND_BINDING_RECEPTORS                                      | 6   | 0.440 | 0.880 | 0.647 | 0.899 | 1 | 172  |
| REACTOME_G1_S_DNA_DAMAGE_CHECKPOINTS                                         | 65  | 0.250 | 0.879 | 0.723 | 0.900 | 1 | 462  |
| REACTOME_GLUCAGON_TYPE_LIGAND_RECEPTORS                                      | 11  | 0.362 | 0.877 | 0.613 | 0.902 | 1 | 2618 |
| REACTOME_GP1B_IX_V_ACTIVATION_SIGNALLING                                     | 7   | 0.422 | 0.877 | 0.621 | 0.902 | 1 | 5244 |
| REACTOME_SYNTHESIS_OF_VERY_LONG_CHAIN_FATTY_ACYLCOAS                         | 15  | 0.342 | 0.876 | 0.614 | 0.901 | 1 | 2450 |
| REACTOME_POU5F1_OCT4_SOX2_NANOG_REPRESS_GENES_RELATED_TO_DIFFERENTIATION     | 7   | 0.414 | 0.874 | 0.637 | 0.906 | 1 | 10   |
| REACTOME_TRANSPORT_OF_NUCLEOSIDES_AND_FREE_PURINE                            | 9   | 0.385 | 0.872 | 0.630 | 0.908 | 1 | 2562 |

|                                                                                                       |     |       |       |       |       |   |      |
|-------------------------------------------------------------------------------------------------------|-----|-------|-------|-------|-------|---|------|
| _AND_PYRIMIDINE_BASES_ACR<br>OSS_THE_PLASMA_MEMBRANE<br>REACTOME_MET_ACTIVATES_PI<br>3K_AKT_SIGNALING | 4   | 0.476 | 0.871 | 0.634 | 0.908 | 1 | 1146 |
| REACTOME_RESPONSE_OF_EIF2<br>AK1_HRI_TO_HEME_DEFICIENCY                                               | 15  | 0.338 | 0.871 | 0.635 | 0.907 | 1 | 2459 |
| REACTOME_REGULATION_OF_IF<br>NA_SIGNALING                                                             | 12  | 0.369 | 0.871 | 0.655 | 0.907 | 1 | 16   |
| REACTOME_SPHINGOLIPID_MET<br>ABOLISM                                                                  | 71  | 0.240 | 0.871 | 0.708 | 0.906 | 1 | 2720 |
| REACTOME_RNA_POLYMERASE_<br>III_TRANSCRIPTION_INITIATION_<br>FROM_TYPE_1_PROMOTER                     | 28  | 0.292 | 0.869 | 0.674 | 0.909 | 1 | 1742 |
| REACTOME_CASPASE_ACTIVATI<br>ON_VIA_EXTRINSIC_APOPTOTIC<br>_SIGNALLING_PATHWAY                        | 21  | 0.308 | 0.868 | 0.668 | 0.909 | 1 | 2464 |
| REACTOME_DECTIN_2_FAMILY                                                                              | 7   | 0.425 | 0.868 | 0.652 | 0.909 | 1 | 341  |
| REACTOME_PEXOPHAGY                                                                                    | 11  | 0.371 | 0.867 | 0.621 | 0.909 | 1 | 2159 |
| REACTOME_SYNTHESIS_OF_PC                                                                              | 23  | 0.307 | 0.867 | 0.631 | 0.908 | 1 | 766  |
| REACTOME_HIV_INFECTION                                                                                | 218 | 0.205 | 0.867 | 0.823 | 0.908 | 1 | 3870 |
| REACTOME_HOST_INTERACTION<br>S_OF_HIV_FACTORS                                                         | 123 | 0.221 | 0.864 | 0.756 | 0.913 | 1 | 3019 |
| REACTOME_COMPLEMENT_CAS<br>CADE                                                                       | 15  | 0.338 | 0.863 | 0.667 | 0.912 | 1 | 2708 |
| REACTOME_NS1_MEDIATED_EF<br>FECTS_ON_HOST_PATHWAYS                                                    | 40  | 0.268 | 0.863 | 0.699 | 0.912 | 1 | 2107 |
| REACTOME_ASSOCIATION_OF_T<br>RIC_CCT_WITH_TARGET_PROTEI<br>NS_DURING_BIOSYNTHESIS                     | 35  | 0.272 | 0.863 | 0.676 | 0.911 | 1 | 3770 |
| REACTOME_SYNTHESIS_OF_PA                                                                              | 27  | 0.288 | 0.863 | 0.692 | 0.910 | 1 | 2469 |
| REACTOME_RAS_PROCESSING                                                                               | 23  | 0.300 | 0.861 | 0.649 | 0.912 | 1 | 4927 |
| REACTOME_PHASE_1_INACTIVA<br>TION_OF_FAST_NA_CHANNELS                                                 | 3   | 0.525 | 0.859 | 0.695 | 0.915 | 1 | 594  |
| REACTOME_GLYCOGEN_STORA<br>GE_DISEASES                                                                | 12  | 0.366 | 0.857 | 0.668 | 0.918 | 1 | 3842 |
| REACTOME_FERTILIZATION                                                                                | 6   | 0.431 | 0.856 | 0.655 | 0.918 | 1 | 1562 |
| REACTOME_NOTCH_HLH_TRAN<br>SCRIPTION_PATHWAY                                                          | 27  | 0.291 | 0.856 | 0.674 | 0.918 | 1 | 4473 |
| REACTOME_PYRUVATE_METAB<br>OLISM                                                                      | 26  | 0.293 | 0.856 | 0.677 | 0.917 | 1 | 2750 |
| REACTOME_BIOSYNTHESIS_OF_<br>EPA_DERIVED_SPMS                                                         | 2   | 0.579 | 0.856 | 0.707 | 0.916 | 1 | 4627 |
| REACTOME_ANTIGEN_ACTIVATE<br>S_B_CELL_RECEPTOR_BCR_LEAD<br>ING_TO_GENERATION_OF_SECO<br>ND_MESSENGERS | 22  | 0.303 | 0.854 | 0.675 | 0.918 | 1 | 3235 |
| REACTOME_KERATAN_SULFATE<br>_BIOSYNTHESIS                                                             | 17  | 0.320 | 0.852 | 0.658 | 0.920 | 1 | 2876 |
| REACTOME_LYSINE_CATABOLIS<br>M                                                                        | 10  | 0.378 | 0.852 | 0.659 | 0.920 | 1 | 2973 |
| REACTOME_SIGNALING_BY_NO<br>TCH3                                                                      | 40  | 0.266 | 0.852 | 0.710 | 0.919 | 1 | 2163 |

|                                                                                                 |     |       |       |       |       |   |      |
|-------------------------------------------------------------------------------------------------|-----|-------|-------|-------|-------|---|------|
| REACTOME_SYNTHESIS_OF_PYR<br>OPHOSPHATES_IN_THE_CYTOSO<br>L                                     | 7   | 0.418 | 0.850 | 0.654 | 0.921 | 1 | 3487 |
| REACTOME_SIGNALING_BY_FGF<br>R3_FUSIONS_IN_CANCER                                               | 9   | 0.379 | 0.850 | 0.670 | 0.921 | 1 | 4118 |
| REACTOME_NEDDYLATI<br>ON                                                                        | 208 | 0.201 | 0.848 | 0.874 | 0.923 | 1 | 3506 |
| REACTOME_PHOSPHOLIPID_ME<br>TABOLISM                                                            | 165 | 0.206 | 0.847 | 0.815 | 0.924 | 1 | 2725 |
| REACTOME_TCF_DEPENDENT_SI<br>GNALING_IN_RESPONSE_TO_W<br>NT                                     | 150 | 0.211 | 0.845 | 0.797 | 0.927 | 1 | 2240 |
| REACTOME_REGULATION_OF_LI<br>PID_METABOLISM_BY_PP<br>ARALPHA                                    | 105 | 0.221 | 0.844 | 0.807 | 0.927 | 1 | 1671 |
| REACTOME_SERINE_BIOSYNTH<br>ESIS                                                                | 9   | 0.380 | 0.843 | 0.660 | 0.927 | 1 | 3160 |
| REACTOME_SPERM_MOTILITY_<br>AND_TAXES                                                           | 2   | 0.570 | 0.843 | 0.751 | 0.927 | 1 | 823  |
| REACTOME_EUKARYOTIC_TRAN<br>SLATION_ELONGATION                                                  | 89  | 0.228 | 0.842 | 0.749 | 0.928 | 1 | 5937 |
| REACTOME_MTORC1_MEDIATE<br>D_SIGNALLING                                                         | 23  | 0.297 | 0.842 | 0.698 | 0.927 | 1 | 2812 |
| REACTOME_SUMO_IS_TRANSFE<br>RRED_FROM_E1_TO_E2_UB<br>E2I_UBC9                                   | 7   | 0.401 | 0.842 | 0.677 | 0.926 | 1 | 4423 |
| REACTOME_ACTIVATED_NTRK2_<br>SIGNALS_THROUGH_RAS                                                | 7   | 0.409 | 0.841 | 0.696 | 0.926 | 1 | 4118 |
| REACTOME_HIV_TRANSCRIPTIO<br>N_ELONGATION                                                       | 41  | 0.260 | 0.839 | 0.742 | 0.929 | 1 | 4042 |
| REACTOME_FATTY_ACIDS                                                                            | 2   | 0.574 | 0.838 | 0.736 | 0.930 | 1 | 1352 |
| REACTOME_AMYLOID_FIBER_FO<br>RMATION                                                            | 42  | 0.261 | 0.836 | 0.728 | 0.932 | 1 | 2333 |
| REACTOME_DIGESTION_OF_DIE<br>TARY_LIPID                                                         | 1   | 0.628 | 0.836 | 0.738 | 0.931 | 1 | 4730 |
| REACTOME_MITOPHAGY                                                                              | 28  | 0.282 | 0.834 | 0.696 | 0.933 | 1 | 4201 |
| REACTOME_IRAK4_DEFICIENCY_<br>TLR2_4                                                            | 5   | 0.436 | 0.834 | 0.672 | 0.933 | 1 | 3437 |
| REACTOME_HDMS_DEMETHYLA<br>TE_HISTONES                                                          | 21  | 0.303 | 0.833 | 0.718 | 0.933 | 1 | 3856 |
| REACTOME_DEFECTIVE_GALNT3<br>_CAUSES_FAMILIAL_HYPERPHOS<br>PHATEMIC_TUMORAL_CALCINO<br>SIS_HFTC | 4   | 0.471 | 0.828 | 0.715 | 0.941 | 1 | 341  |
| REACTOME_DEATH_RECEPTOR_<br>SIGNALLING                                                          | 126 | 0.211 | 0.823 | 0.862 | 0.949 | 1 | 3849 |
| REACTOME_SHC_RELATED_EVE<br>NTS_TRIGGERED_BY_IGF1R                                              | 7   | 0.395 | 0.820 | 0.716 | 0.953 | 1 | 4118 |
| REACTOME_MASTL_FACILITATES<br>_MITOTIC_PROGRESSION                                              | 10  | 0.357 | 0.820 | 0.680 | 0.952 | 1 | 2479 |
| REACTOME_ERYTHROCYTES_TA<br>KE_UP_CARBON_DIOXIDE_AND_<br>RELEASE_OXYGEN                         | 6   | 0.404 | 0.817 | 0.700 | 0.956 | 1 | 358  |

|                                                                                         |    |       |       |       |       |   |      |
|-----------------------------------------------------------------------------------------|----|-------|-------|-------|-------|---|------|
| REACTOME_TRANSLATION_OF_REPLICASE_AND_ASSEMBLY_OF_THE_REPLICATION_TRANSCRIPTION_COMPLEX | 13 | 0.335 | 0.817 | 0.696 | 0.956 | 1 | 2949 |
| REACTOME_BETA_OXIDATION_OF_PRISTANOYL_COA                                               | 8  | 0.377 | 0.817 | 0.720 | 0.955 | 1 | 2748 |
| REACTOME_NOTCH3_ACTIVATION_AND_TRANSMISSION_OF_SIGNAL_TO_THE_NUCLEUS                    | 21 | 0.288 | 0.816 | 0.725 | 0.955 | 1 | 1273 |
| REACTOME_APOPTOTIC_CLEAVAGE_OF_CELL_ADHESION_PROTEINS                                   | 8  | 0.375 | 0.815 | 0.697 | 0.955 | 1 | 3441 |
| REACTOME_SIGNALING_BY_CYTOSOLIC_FGFR1_FUSION_MUTANTS                                    | 18 | 0.298 | 0.813 | 0.704 | 0.958 | 1 | 5475 |
| REACTOME_DOPAMINE_NEUROTRANSMITTER_RELEASE_CYCLE                                        | 14 | 0.323 | 0.813 | 0.741 | 0.957 | 1 | 2674 |
| REACTOME_ACTIVATION_OF_NOXA_AND_TRANSLOCATION_TO_MITOCHONDRIA                           | 5  | 0.414 | 0.811 | 0.685 | 0.959 | 1 | 2084 |
| REACTOME_CA2_PATHWAY                                                                    | 45 | 0.243 | 0.810 | 0.785 | 0.960 | 1 | 2079 |
| REACTOME_SUMOYLATION_OF_UBIQUITINYLATION_PROTEINS                                       | 39 | 0.255 | 0.810 | 0.773 | 0.959 | 1 | 4377 |
| REACTOME_REGULATION_OF_PYRUVATE_DEHYDROGENASE_PDH_COMPLEX                               | 15 | 0.312 | 0.809 | 0.718 | 0.958 | 1 | 2713 |
| REACTOME_MODULATION_BY_MTB_OF_HOST_IMMUNE_SYSTEM                                        | 6  | 0.412 | 0.809 | 0.701 | 0.958 | 1 | 3842 |
| REACTOME_SCAVENGING_BY_CLASS_F_RECEPTORS                                                | 4  | 0.449 | 0.806 | 0.715 | 0.962 | 1 | 1484 |
| REACTOME_NUCLEAR_PORE_COMPLEX_NPC_DISASSEMBLY                                           | 36 | 0.256 | 0.805 | 0.775 | 0.961 | 1 | 2107 |
| REACTOME_CD209_DC_SIGNALING                                                             | 18 | 0.302 | 0.805 | 0.738 | 0.961 | 1 | 4927 |
| REACTOME_SUMOYLATION_OF_CHROMATIN_ORGANIZATION_PROTEINS                                 | 57 | 0.232 | 0.803 | 0.804 | 0.964 | 1 | 3995 |
| REACTOME_GOLGI_ASSOCIATED_VESICLE_BIOGENESIS                                            | 54 | 0.233 | 0.801 | 0.805 | 0.965 | 1 | 4952 |
| REACTOME_INTERACTION_BETWEEN_L1_AND_ANKYRINS                                            | 16 | 0.308 | 0.801 | 0.744 | 0.965 | 1 | 2709 |
| REACTOME_GLUONEOGENESIS                                                                 | 25 | 0.278 | 0.799 | 0.775 | 0.967 | 1 | 3792 |
| REACTOME_NEF_MEDIATED_DOWNREGULATION_OF_MHC_CLASS_I_COMPLEX_CELL_SURFACE_EXPRESSION     | 9  | 0.368 | 0.797 | 0.737 | 0.969 | 1 | 4650 |
| REACTOME_SUMOYLATION_OF_DNA_REPLICATION_PROTEINS                                        | 46 | 0.241 | 0.795 | 0.812 | 0.970 | 1 | 4377 |
| REACTOME_FCGR3A_MEDIATED_IL10_SYNTHESIS                                                 | 24 | 0.275 | 0.794 | 0.748 | 0.971 | 1 | 779  |

|                                                                                                                           |     |       |       |       |       |   |      |
|---------------------------------------------------------------------------------------------------------------------------|-----|-------|-------|-------|-------|---|------|
| REACTOME_TNFR1_MEDIATED_CERAMIDE_PRODUCTION                                                                               | 4   | 0.440 | 0.792 | 0.732 | 0.973 | 1 | 4494 |
| REACTOME_RESOLUTION_OF_SISTER_CHROMATID_COHESION                                                                          | 116 | 0.204 | 0.792 | 0.900 | 0.972 | 1 | 2549 |
| REACTOME_ACTIVATION_OF_THE_MRNA_UPON_BINDING_OF_THE_CAP_BINDING_COMPLEX_AND_EIF5_AND_SUBSEQUENT_BINDING_TO_43S            | 56  | 0.228 | 0.791 | 0.817 | 0.973 | 1 | 9316 |
| REACTOME_G_ALPHA_Z_SIGNALING_EVENTS                                                                                       | 24  | 0.273 | 0.789 | 0.776 | 0.974 | 1 | 3369 |
| REACTOME_VLDL_CLEARANCE                                                                                                   | 3   | 0.474 | 0.785 | 0.747 | 0.980 | 1 | 685  |
| REACTOME_MICRORNA_MIRNA_BIOGENESIS                                                                                        | 24  | 0.272 | 0.781 | 0.787 | 0.984 | 1 | 2830 |
| REACTOME_TP53_REGULATES_TRANSCRIPTION_OF_ADDITIONAL_CELL_CYCLE_GENES_WHOSE_EXACT_ROLE_IN_THE_P53_PATHWAY_REMAIN_UNCERTAIN | 21  | 0.281 | 0.779 | 0.793 | 0.986 | 1 | 2287 |
| REACTOME_CONSTITUTIVE_SIGNALING_BY_LIGAND_RESPONSIVE_EGFR_CANCER_VARIANTS                                                 | 16  | 0.297 | 0.779 | 0.785 | 0.985 | 1 | 4118 |
| REACTOME_SIGNALING_BY_PDGFR_IN_DISEASE                                                                                    | 17  | 0.290 | 0.779 | 0.786 | 0.985 | 1 | 4118 |
| REACTOME_VIRAL_MESSENGER_RNA_SYNTHESIS                                                                                    | 44  | 0.238 | 0.778 | 0.848 | 0.985 | 1 | 2107 |
| REACTOME_TAK1_ACTIVATES_NFKB_BY_PHOSPHORYLATION_AND_ACTIVATION_OF_IKKS_COMPLEX                                            | 29  | 0.259 | 0.778 | 0.783 | 0.984 | 1 | 4296 |
| REACTOME_METHYLATION                                                                                                      | 10  | 0.337 | 0.777 | 0.763 | 0.984 | 1 | 1419 |
| REACTOME_CHAPERONE_MEDIATED_AUTOPHAGY                                                                                     | 17  | 0.290 | 0.777 | 0.799 | 0.983 | 1 | 4166 |
| REACTOME_MAPK6_MAPK4_SIGNALING                                                                                            | 82  | 0.214 | 0.774 | 0.876 | 0.986 | 1 | 3130 |
| REACTOME_SIGNALING_BY_PDGFR_TRANSMEMBRANE_JUXTAMEMBRANE_AND_KINASE_DOMAIN_MUTANTS                                         | 11  | 0.321 | 0.773 | 0.754 | 0.986 | 1 | 4118 |
| REACTOME_HEDGEHOG_OFF_STATE                                                                                               | 97  | 0.206 | 0.772 | 0.918 | 0.986 | 1 | 910  |
| REACTOME_ELEVATION_OF_CYTOSOLIC_CA2_LEVELS                                                                                | 10  | 0.341 | 0.772 | 0.762 | 0.986 | 1 | 1383 |
| REACTOME_TRANSPORT_OF_MATURE_TRANSCRIPT_TO_CYTOPLASM                                                                      | 79  | 0.211 | 0.768 | 0.876 | 0.991 | 1 | 4377 |
| REACTOME_IRAK1_RECRUITS_IKK_COMPLEX                                                                                       | 14  | 0.308 | 0.766 | 0.762 | 0.991 | 1 | 2742 |
| REACTOME_MRNA_CAPPING                                                                                                     | 28  | 0.262 | 0.766 | 0.796 | 0.991 | 1 | 3778 |
| REACTOME_GENOME_REPLICATION_AND_TRANSCRIPTION                                                                             | 6   | 0.385 | 0.765 | 0.753 | 0.991 | 1 | 1276 |

|                                                                        |     |       |       |       |       |   |      |
|------------------------------------------------------------------------|-----|-------|-------|-------|-------|---|------|
| REACTOME_SUMOYLATION_OF_SUMOYLATION_PROTEINS                           | 35  | 0.245 | 0.765 | 0.846 | 0.990 | 1 | 4377 |
| REACTOME_E3_UBIQUITIN_LIGASES_UBIQUITINATE_TARGET_PROTEINS             | 45  | 0.229 | 0.765 | 0.865 | 0.989 | 1 | 4659 |
| REACTOME_ENDOSOMAL_SORTING_COMPLEX_REQUIRED_FOR_TRANSPORT_ESCRT        | 31  | 0.252 | 0.764 | 0.838 | 0.989 | 1 | 4257 |
| REACTOME_DISEASES_ASSOCIATED_WITH_N_GLYCOSYLATION_OF_PROTEINS          | 17  | 0.282 | 0.761 | 0.792 | 0.993 | 1 | 2489 |
| REACTOME_TRANSPORT_OF_MATURE_MRNAS_DERIVED_FROM_INTRONLESS_TRANSCRIPTS | 43  | 0.235 | 0.760 | 0.855 | 0.992 | 1 | 4177 |
| REACTOME_FORMATION_OF_THE_EARLY_ELONGATION_COMPLEX                     | 32  | 0.242 | 0.756 | 0.855 | 0.997 | 1 | 3778 |
| REACTOME_SYNTHESIS_OF_PIP3_AT_THE_GOLGI_MEMBRANE                       | 15  | 0.291 | 0.755 | 0.801 | 0.997 | 1 | 3066 |
| REACTOME_INITIAL_TRIGGERING_OF_COMPLEMENT                              | 7   | 0.363 | 0.753 | 0.791 | 0.999 | 1 | 2379 |
| REACTOME_TRANSCRIPTIONAL_REGULATION_OF_WHITE_ADIPOCYTE_DIFFERENTIATION | 73  | 0.210 | 0.753 | 0.915 | 0.998 | 1 | 1043 |
| REACTOME_GLUCAGON_SIGNALING_IN_METABOLIC_REGULATION                    | 16  | 0.285 | 0.752 | 0.797 | 0.998 | 1 | 779  |
| REACTOME_RNA_POLYMERASE_I_TRANSCRIPTION_TERMINATION                    | 30  | 0.248 | 0.751 | 0.840 | 0.998 | 1 | 3764 |
| REACTOME_VITAMINS                                                      | 3   | 0.447 | 0.751 | 0.774 | 0.997 | 1 | 2118 |
| REACTOME_SCAVENGING_BY_CLASS_B_RECEPTORS                               | 1   | 0.564 | 0.749 | 0.896 | 0.999 | 1 | 5537 |
| REACTOME_VASOPRESSIN_REGULATES_RENAL_WATER_HOMEOSTASIS_VIA_AQUAPORINS  | 21  | 0.268 | 0.748 | 0.828 | 0.999 | 1 | 2618 |
| REACTOME_DEFECTIVE_LFNG_CAUSES_SCDO3                                   | 4   | 0.418 | 0.746 | 0.773 | 0.999 | 1 | 7395 |
| REACTOME_DAP12_SIGNALING                                               | 21  | 0.267 | 0.746 | 0.845 | 0.999 | 1 | 770  |
| REACTOME_TP53_REGULATES_METABOLIC_GENES                                | 81  | 0.203 | 0.743 | 0.934 | 1.000 | 1 | 3232 |
| REACTOME_PTEN_REGULATION                                               | 135 | 0.187 | 0.740 | 0.964 | 1.000 | 1 | 3097 |
| REACTOME_HSF1_DEPENDENT_TRANSACTIVATION                                | 31  | 0.240 | 0.738 | 0.872 | 1.000 | 1 | 4406 |
| REACTOME_REGULATION_OF_TP53_EXPRESSION_AND_DEGRADATION                 | 35  | 0.235 | 0.738 | 0.870 | 1.000 | 1 | 3170 |
| REACTOME_DAP12_INTERACTIONS                                            | 24  | 0.257 | 0.738 | 0.824 | 1.000 | 1 | 2804 |
| REACTOME_MECP2_REGULATES_NEURONAL_RECEPTORS_AND_CHANNELS               | 13  | 0.299 | 0.737 | 0.819 | 1.000 | 1 | 1146 |

|                                                                             |     |       |       |       |       |   |      |
|-----------------------------------------------------------------------------|-----|-------|-------|-------|-------|---|------|
| REACTOME_SUMO_IS_CONJUGATED_TO_E1_UBA2_SAE1                                 | 5   | 0.387 | 0.734 | 0.781 | 1.000 | 1 | 3483 |
| REACTOME_FOLDING_OF_ACTIN_BY_CCT_TRIC                                       | 9   | 0.330 | 0.733 | 0.790 | 1.000 | 1 | 2601 |
| REACTOME_TETRAHYDROBIOPTERIN_BH4_SYNTHESIS_RECYCLING_SALVAGE_AND_REGULATION | 9   | 0.334 | 0.733 | 0.813 | 1.000 | 1 | 1587 |
| REACTOME_EXPORT_OF_VIRAL_RIBONUCLEOPROTEINS_FROM_NUCLEUS                    | 33  | 0.239 | 0.732 | 0.882 | 1.000 | 1 | 2107 |
| REACTOME_MATURATION_OF_PROTEIN_3A                                           | 6   | 0.360 | 0.731 | 0.810 | 1.000 | 1 | 3799 |
| REACTOME_N_GLYCAN_ANTENNAE_ELONGATION_IN_THE_MEDIAL_TRANS_GOLGI             | 16  | 0.287 | 0.731 | 0.843 | 1.000 | 1 | 2876 |
| REACTOME_CYTOCHROME_C_MEDIATED_APOPTOTIC_RESPONSE                           | 13  | 0.296 | 0.731 | 0.825 | 1.000 | 1 | 2887 |
| REACTOME_REGULATION_OF_CHOLESTEROL_BIOSYNTHESIS_BY_SREBP_SREBF              | 55  | 0.212 | 0.730 | 0.904 | 1.000 | 1 | 1248 |
| REACTOME_PURINE_SALVAGE                                                     | 12  | 0.303 | 0.728 | 0.818 | 1.000 | 1 | 2827 |
| REACTOME_METHIONINE_SALVAGE_PATHWAY                                         | 6   | 0.360 | 0.725 | 0.814 | 1.000 | 1 | 3471 |
| REACTOME_METABOLISM_OF_STEROID_HORMONES                                     | 17  | 0.274 | 0.723 | 0.852 | 1.000 | 1 | 4197 |
| REACTOME_PEPTIDE_HORMONE_METABOLISM                                         | 44  | 0.219 | 0.723 | 0.935 | 1.000 | 1 | 3527 |
| REACTOME_HUR_ELAVL1_BINDS_AND_STABILIZES_MRNA                               | 8   | 0.335 | 0.723 | 0.819 | 1.000 | 1 | 4159 |
| REACTOME_TP53_REGULATES_TRANSCRIPTION_OF_CASPASE_ACTIVATORS_AND_CASPASES    | 8   | 0.334 | 0.723 | 0.813 | 1.000 | 1 | 2575 |
| REACTOME_MITOTIC_PROPHASE                                                   | 91  | 0.191 | 0.722 | 0.946 | 1.000 | 1 | 4458 |
| REACTOME_NECTIN_NECL_TRANS_HETERODIMERIZATION                               | 4   | 0.403 | 0.721 | 0.805 | 1.000 | 1 | 2269 |
| REACTOME_PHOSPHATE_BOND_HYDROLYSIS_BY_NUDT_PROTEINS                         | 7   | 0.342 | 0.719 | 0.837 | 1.000 | 1 | 537  |
| REACTOME_SYNTHESIS_OF_12_EICOSATETRAENOIC_ACID_DERIVATIVES                  | 5   | 0.381 | 0.715 | 0.789 | 1.000 | 1 | 1084 |
| REACTOME_DCC_MEDIATED_ATTRACTIVE_SIGNALING                                  | 12  | 0.297 | 0.714 | 0.845 | 1.000 | 1 | 312  |
| REACTOME_PYRUVATE_METABOLISM_AND_CITRIC_ACID_TCA_CYCLE                      | 49  | 0.215 | 0.713 | 0.902 | 1.000 | 1 | 2973 |
| REACTOME_SIGNALING_BY_HEDGEHOG                                              | 123 | 0.184 | 0.713 | 0.979 | 1.000 | 1 | 910  |
| REACTOME_ATTENUATION_PHASE                                                  | 23  | 0.251 | 0.712 | 0.872 | 1.000 | 1 | 4406 |

|                                                                                 |     |       |       |       |       |   |      |
|---------------------------------------------------------------------------------|-----|-------|-------|-------|-------|---|------|
| REACTOME_DISEASES_ASSOCIATED_WITH_SURFACTANT_METABOLISM                         | 1   | 0.539 | 0.709 | 0.933 | 1.000 | 1 | 5856 |
| REACTOME_SIGNALING_BY_BMP                                                       | 16  | 0.268 | 0.709 | 0.847 | 1.000 | 1 | 3722 |
| REACTOME_LRR_FLII_INTERACTING_PROTEIN_1_LRRFIP1_ACTIVATES_TYPE_I_IFN_PRODUCTION | 5   | 0.367 | 0.709 | 0.803 | 1.000 | 1 | 4925 |
| REACTOME_CLEC7A_DECTIN_1_INDUCES_NFAT_ACTIVATION                                | 11  | 0.294 | 0.704 | 0.842 | 1.000 | 1 | 1710 |
| REACTOME_ADP_SIGNALLING_THROUGH_P2Y_PURINOCEPTOR_12                             | 10  | 0.301 | 0.702 | 0.825 | 1.000 | 1 | 3050 |
| REACTOME_N_GLYCAN_ANTENNAE_ELONGATION                                           | 10  | 0.302 | 0.702 | 0.854 | 1.000 | 1 | 2876 |
| REACTOME_SIGNALING_BY_NOTCH1_T_7_9_NOTCH1_M1580_K2555_TRANSLOCATION_MUTANT      | 7   | 0.342 | 0.701 | 0.826 | 1.000 | 1 | 472  |
| REACTOME_CELLULAR_RESPONSE_TO_HEAT_STRESS                                       | 93  | 0.187 | 0.701 | 0.978 | 1.000 | 1 | 4406 |
| REACTOME_SIGNALING_BY_THE_B_CELL_RECEPTOR_BCR                                   | 97  | 0.185 | 0.700 | 0.972 | 1.000 | 1 | 4340 |
| REACTOME_RNA_POLYMERASE_III_TRANSCRIPTION                                       | 40  | 0.220 | 0.700 | 0.926 | 1.000 | 1 | 1742 |
| REACTOME_CLASS_I_MHC_MEDIATED_ANTIGEN_PROCESSING_PPRESENTATION                  | 319 | 0.161 | 0.699 | 1.000 | 1.000 | 1 | 4026 |
| REACTOME_CARGO_TRAFFICKING_TO_THE_PERICILIARY_MEMBRANE                          | 43  | 0.210 | 0.696 | 0.943 | 1.000 | 1 | 3269 |
| REACTOME_HATS_ACETYLATE_HISTONES                                                | 85  | 0.187 | 0.694 | 0.966 | 1.000 | 1 | 3159 |
| REACTOME_PINK1_PRKN_MEDIATED_MITOPHAGY                                          | 21  | 0.248 | 0.693 | 0.899 | 1.000 | 1 | 2159 |
| REACTOME_NEUROTOXICITY_OF_CLOSTRIDIUM_TOXINS                                    | 6   | 0.349 | 0.691 | 0.829 | 1.000 | 1 | 2256 |
| REACTOME_MULTIFUNCTIONAL_ANION_EXCHANGERS                                       | 4   | 0.388 | 0.690 | 0.844 | 1.000 | 1 | 1633 |
| REACTOME_SCF_SKP2_MEDIATED_DEGRADATION_OF_P27_P21                               | 59  | 0.195 | 0.689 | 0.961 | 1.000 | 1 | 1052 |
| REACTOME_ACTIVATION_OF_C3_AND_C5                                                | 5   | 0.360 | 0.686 | 0.822 | 1.000 | 1 | 2379 |
| REACTOME_DNA_DAMAGE_TELOMERE_STRESS_INDUCED_SENESCENCE                          | 38  | 0.215 | 0.686 | 0.931 | 1.000 | 1 | 462  |
| REACTOME_COOPERATION_OF_PDCL_PHLP1_AND_TRIC_CCT_IN_G_PROTEIN_BETA_FOLDING       | 24  | 0.241 | 0.686 | 0.888 | 1.000 | 1 | 3369 |
| REACTOME_MITOCHONDRIAL_BIOGENESIS                                               | 87  | 0.184 | 0.685 | 0.980 | 1.000 | 1 | 3361 |
| REACTOME_TRANSCRIPTION_OF_THE_HIV_GENOME                                        | 66  | 0.195 | 0.682 | 0.963 | 1.000 | 1 | 3815 |

|                                                                                                             |     |       |       |       |       |   |      |
|-------------------------------------------------------------------------------------------------------------|-----|-------|-------|-------|-------|---|------|
| REACTOME_OVARIAN_TUMOR_DOMAIN_PROTEASES                                                                     | 34  | 0.221 | 0.682 | 0.927 | 1.000 | 1 | 3082 |
| REACTOME_NUCLEOTIDE_LIKE_PURINERGIC_RECEPTORS                                                               | 5   | 0.350 | 0.681 | 0.873 | 1.000 | 1 | 948  |
| REACTOME_INFLUENZA_INFECTION                                                                                | 151 | 0.168 | 0.680 | 0.991 | 1.000 | 1 | 5337 |
| REACTOME_SIGNALING_BY_ROBO_RECEPTORS                                                                        | 191 | 0.164 | 0.680 | 0.999 | 1.000 | 1 | 5544 |
| REACTOME_ORGANIC_ANION_TRANSPORTERS                                                                         | 3   | 0.416 | 0.677 | 0.859 | 1.000 | 1 | 1172 |
| REACTOME_ACTIVATED_NOTCH1_TRANSMITS_SIGNAL_TO_THE_NUCLEUS                                                   | 26  | 0.233 | 0.677 | 0.903 | 1.000 | 1 | 1273 |
| REACTOME_REGULATION_OF_GLUCOKINASE_BY_GLUCOKINASE_REGULATORY_PROTEIN                                        | 30  | 0.224 | 0.674 | 0.933 | 1.000 | 1 | 2107 |
| REACTOME_DISEASES_ASSOCIATED_WITH_GLYCOSYLATION_PRECURSOR_BIOSYNTHESIS                                      | 18  | 0.245 | 0.667 | 0.906 | 1.000 | 1 | 2649 |
| REACTOME_CROSS_PRESENTATION_OF_SOLUBLE_EXOGENOUS_ANTIGENS_ENDOSOMES                                         | 45  | 0.202 | 0.667 | 0.952 | 1.000 | 1 | 45   |
| REACTOME_CREB3_FACTORS_ACTIVATE_GENES                                                                       | 8   | 0.310 | 0.666 | 0.865 | 1.000 | 1 | 1248 |
| REACTOME_PRC2_METHYLATES_HISTONES_AND_DNA                                                                   | 23  | 0.234 | 0.665 | 0.924 | 1.000 | 1 | 85   |
| REACTOME_RELEASE_OF_APOPTOTIC_FACTORS_FROM_THE_MITOCHONDRIA                                                 | 5   | 0.352 | 0.663 | 0.844 | 1.000 | 1 | 8232 |
| REACTOME_MTOR_SIGNALLING                                                                                    | 39  | 0.206 | 0.662 | 0.947 | 1.000 | 1 | 3484 |
| REACTOME_VITAMIN_D_CALCIFEROL_METABOLISM                                                                    | 8   | 0.304 | 0.661 | 0.880 | 1.000 | 1 | 3128 |
| REACTOME_FATTY_ACYL_COA_BIOSYNTHESIS                                                                        | 26  | 0.221 | 0.658 | 0.928 | 1.000 | 1 | 2450 |
| REACTOME_REGULATION_OF_HSF1_MEDIATED_HEAT_SHOCK_RESPONSE                                                    | 76  | 0.181 | 0.658 | 0.985 | 1.000 | 1 | 3995 |
| REACTOME_NUCLEAR_ENVELOPE_BREAKDOWN                                                                         | 52  | 0.195 | 0.656 | 0.969 | 1.000 | 1 | 4409 |
| REACTOME_APOPTOTIC_FACTOR_MEDIATED_RESPONSE                                                                 | 18  | 0.240 | 0.655 | 0.927 | 1.000 | 1 | 2887 |
| REACTOME_REGULATION_OF_GENE_EXPRESSION_IN_LATE_STAGE_BRANCHING_MORPHOGENESIS_PANCREATIC_BUD_PRECURSOR_CELLS | 12  | 0.264 | 0.651 | 0.919 | 1.000 | 1 | 4374 |
| REACTOME_ATF6_ATF6_ALPHA_ACTIVATES_CHAPERONES                                                               | 12  | 0.269 | 0.651 | 0.897 | 1.000 | 1 | 4215 |
| REACTOME_TYSND1_CLEAVES_PEROXISOMAL_PROTEINS                                                                | 7   | 0.310 | 0.649 | 0.871 | 1.000 | 1 | 8768 |
| REACTOME_TRAFFICKING_OF_MYRISTOYLATED_PROTEINS_TO_THE_CILIUM                                                | 4   | 0.367 | 0.646 | 0.879 | 1.000 | 1 | 3116 |

|                                                                                                     |     |       |       |       |       |   |      |
|-----------------------------------------------------------------------------------------------------|-----|-------|-------|-------|-------|---|------|
| REACTOME_C_TYPE_LECTIN_RE<br>CEPTORS_CLRS_                                                          | 112 | 0.167 | 0.643 | 0.994 | 1.000 | 1 | 4340 |
| REACTOME_DEX_H_BOX_HELIC<br>ASES_ACTIVATE_TYPE_I_IFN_AN<br>D_INFLAMMATORY_CYTOKINES<br>_PRODUCTION_ | 7   | 0.310 | 0.640 | 0.878 | 1.000 | 1 | 5070 |
| REACTOME_INITIATION_OF_NU<br>CLEAR_ENVELOPE_NE_REFORM<br>ATION                                      | 19  | 0.234 | 0.635 | 0.927 | 1.000 | 1 | 9743 |
| REACTOME_PROCESSING_OF_C<br>APPED_INTRON_CONTAINING_P<br>RE_MRNA                                    | 236 | 0.149 | 0.634 | 1.000 | 1.000 | 1 | 4177 |
| REACTOME_PHOSPHORYLATION<br>_OF_THE_APC_C                                                           | 20  | 0.226 | 0.631 | 0.941 | 1.000 | 1 | 5013 |
| REACTOME_CONSTITUTIVE_SIG<br>NALING_BY_EGFRVIII                                                     | 12  | 0.252 | 0.625 | 0.910 | 1.000 | 1 | 4118 |
| REACTOME_APC_C_CDC20_MED<br>IATED_DEGRADATION_OF_CYCLI<br>N_B                                       | 24  | 0.218 | 0.623 | 0.951 | 1.000 | 1 | 5013 |
| REACTOME_TRANSCRIPTIONAL_<br>REGULATION_BY_SMALL_RNAS                                               | 57  | 0.180 | 0.622 | 0.984 | 1.000 | 1 | 2107 |
| REACTOME_TRANSCRIPTIONAL_<br>REGULATION_BY_VENTX                                                    | 36  | 0.197 | 0.619 | 0.976 | 1.000 | 1 | 1433 |
| REACTOME_LDL_CLEARANCE                                                                              | 18  | 0.230 | 0.619 | 0.948 | 1.000 | 1 | 1372 |
| REACTOME_DEFENSINS                                                                                  | 3   | 0.381 | 0.618 | 0.911 | 1.000 | 1 | 1251 |
| REACTOME_ALPHA_DEFENSINS                                                                            | 3   | 0.381 | 0.617 | 0.909 | 1.000 | 1 | 1251 |
| REACTOME_EUKARYOTIC_TRAN<br>SLATION_INITIATION                                                      | 113 | 0.158 | 0.615 | 0.999 | 1.000 | 1 | 5937 |
| REACTOME_ARACHIDONATE_PR<br>ODUCTION_FROM_DAG                                                       | 4   | 0.351 | 0.615 | 0.887 | 1.000 | 1 | 4067 |
| REACTOME_MRNA_SPLICING                                                                              | 186 | 0.149 | 0.612 | 1.000 | 1.000 | 1 | 4161 |
| REACTOME_AQUAPORIN_MEDI<br>ATED_TRANSPORT                                                           | 24  | 0.212 | 0.612 | 0.963 | 1.000 | 1 | 2618 |
| REACTOME_NONSENSE_MEDIAT<br>ED_DECAY_NMD_                                                           | 110 | 0.161 | 0.610 | 0.997 | 1.000 | 1 | 6007 |
| REACTOME_MITOTIC_TELOPHAS<br>E_CYTOKINESIS                                                          | 13  | 0.245 | 0.609 | 0.927 | 1.000 | 1 | 9605 |
| REACTOME_BETA_OXIDATION_<br>OF_HEXANOYL_COA_TO_BUTAN<br>OYL_COA                                     | 5   | 0.319 | 0.608 | 0.909 | 1.000 | 1 | 8660 |
| REACTOME_NUCLEAR_IMPORT_<br>OF_REV_PROTEIN                                                          | 34  | 0.192 | 0.608 | 0.973 | 1.000 | 1 | 2107 |
| REACTOME_ALPHA_LINOLENIC_<br>OMEGA3_AND_LINOLEIC_OMEG<br>A6_ACID_METABOLISM                         | 11  | 0.252 | 0.606 | 0.925 | 1.000 | 1 | 4978 |
| REACTOME_MYOCLONIC_EPILEP<br>SY_OF_LAFORA                                                           | 7   | 0.287 | 0.604 | 0.922 | 1.000 | 1 | 3842 |
| REACTOME_DEACTIVATION_OF_<br>THE_BETA_CATENIN_TRANSACTI<br>VATING_COMPLEX                           | 35  | 0.192 | 0.603 | 0.974 | 1.000 | 1 | 3842 |

|                                                                                                                                      |     |       |       |       |       |   |       |
|--------------------------------------------------------------------------------------------------------------------------------------|-----|-------|-------|-------|-------|---|-------|
| REACTOME_TP53_REGULATES_TRANSCRIPTION_OF_DNA_REPAIR_GENES                                                                            | 60  | 0.171 | 0.603 | 0.995 | 1.000 | 1 | 3815  |
| REACTOME_RNA_POLYMERASE_II_TRANSCRIPTION_TERMINATION                                                                                 | 63  | 0.171 | 0.599 | 0.997 | 1.000 | 1 | 4271  |
| REACTOME_LINOLEIC_ACID_LAMETABOLISM                                                                                                  | 6   | 0.302 | 0.598 | 0.918 | 1.000 | 1 | 4292  |
| REACTOME_PROTEIN_METHYLATION                                                                                                         | 16  | 0.228 | 0.593 | 0.958 | 1.000 | 1 | 4224  |
| REACTOME_POSTMITOTIC_NUCLEAR_PORE_COMPLEX_NPC_REFORMATION                                                                            | 27  | 0.200 | 0.591 | 0.964 | 1.000 | 1 | 2107  |
| REACTOME_CD28_DEPENDENT_PI3K_AKT_SIGNALING                                                                                           | 19  | 0.212 | 0.589 | 0.969 | 1.000 | 1 | 3080  |
| REACTOME_ANTIGEN_PROCESSING_UBIQUITINATION_PROTEASOME_DEGRADATION                                                                    | 272 | 0.136 | 0.587 | 1.000 | 1.000 | 1 | 4026  |
| REACTOME_RNA_POLYMERASE_II_TRANSCRIBES_SNRNA_GENES                                                                                   | 74  | 0.162 | 0.584 | 0.995 | 1.000 | 1 | 3815  |
| REACTOME_INTERLEUKIN_1_FAMILY_SIGNALING                                                                                              | 108 | 0.151 | 0.584 | 1.000 | 1.000 | 1 | 3449  |
| REACTOME_MRNA_SPLICING_MINOR_PATHWAY                                                                                                 | 52  | 0.172 | 0.581 | 0.984 | 1.000 | 1 | 2715  |
| REACTOME_DOWNSTREAM_SIGNALING_EVENTS_OF_B_CELL_RECEPTOR_BCR                                                                          | 76  | 0.161 | 0.578 | 0.998 | 1.000 | 1 | 4991  |
| REACTOME_PKA_MEDIATED_PHOSPHORYLATION_OF_CREB                                                                                        | 13  | 0.231 | 0.573 | 0.954 | 1.000 | 1 | 779   |
| REACTOME_MITOTIC_METAPHASE_AND_ANAPHASE                                                                                              | 224 | 0.134 | 0.567 | 1.000 | 1.000 | 1 | 2240  |
| REACTOME_CLEC7A_DECTIN_1_SIGNALING                                                                                                   | 94  | 0.151 | 0.566 | 0.998 | 1.000 | 1 | 4335  |
| REACTOME_INHIBITION_OF_THE_PROTEOLYTIC_ACTIVITY_OF_APC_C_REQUIRED_FOR_THE_ONSET_OF_ANAPHASE_BY_MITOTIC_SPINDLE_CHECKPOINT_COMPONENTS | 21  | 0.200 | 0.564 | 0.977 | 1.000 | 1 | 10167 |
| REACTOME_CONVERSION_FROM_APC_C_CDC20_TO_APC_C_CDH1_IN_LATE_ANAPHASE                                                                  | 20  | 0.202 | 0.554 | 0.986 | 1.000 | 1 | 3783  |
| REACTOME_REGULATION_OF_P_TEN_LOCALIZATION                                                                                            | 9   | 0.244 | 0.549 | 0.951 | 1.000 | 1 | 9613  |
| REACTOME_ERYTHROCYTES_TAKE_UP_OXYGEN_AND_RELEASE_CARBOONDIOXIDE                                                                      | 2   | 0.362 | 0.549 | 0.959 | 1.000 | 1 | 2318  |
| REACTOME_MECP2_REGULATES_TRANSCRIPTION_OF_NEURONALL_LIGANDS                                                                          | 5   | 0.288 | 0.546 | 0.960 | 1.000 | 1 | 9046  |
| REACTOME_SEPARATION_OF_SISTER_CHROMATIDS                                                                                             | 179 | 0.133 | 0.544 | 1.000 | 1.000 | 1 | 2240  |

|                                                                                                |     |       |       |       |       |   |      |
|------------------------------------------------------------------------------------------------|-----|-------|-------|-------|-------|---|------|
| REACTOME_CHROMATIN_MODIFYING_ENZYMES                                                           | 208 | 0.129 | 0.542 | 1.000 | 1.000 | 1 | 3168 |
| REACTOME_REGULATION_OF_MECP2_EXPRESSION_AND_ACTIVITY                                           | 29  | 0.184 | 0.541 | 0.993 | 1.000 | 1 | 1061 |
| REACTOME_B_WICH_COMPLEX_POSITIVELY_REGULATES_RRNA_EXPRESSION                                   | 41  | 0.168 | 0.539 | 0.993 | 1.000 | 1 | 3793 |
| REACTOME_NEF_MEDIATED_CD8_DOWN_REGULATION                                                      | 7   | 0.258 | 0.539 | 0.960 | 1.000 | 1 | 2755 |
| REACTOME_DOWNREGULATION_OF_ERBB4_SIGNALING                                                     | 8   | 0.248 | 0.536 | 0.956 | 1.000 | 1 | 3842 |
| REACTOME_BETA_OXIDATION_OF_BUTANOYL_COA_TO_ACETYL_COA                                          | 3   | 0.319 | 0.531 | 0.948 | 1.000 | 1 | 8660 |
| REACTOME_PKA_ACTIVATION_IN_GLUCAGON_SIGNALLING                                                 | 10  | 0.223 | 0.520 | 0.979 | 1.000 | 1 | 2328 |
| REACTOME_ARMS_MEDIATED_ACTIVATION                                                              | 5   | 0.268 | 0.519 | 0.964 | 1.000 | 1 | 3484 |
| REACTOME_HCMV_LATE_EVENTS                                                                      | 60  | 0.148 | 0.516 | 1.000 | 1.000 | 1 | 4377 |
| REACTOME_ACYL_CHAIN_REMODELING_OF_CL                                                           | 5   | 0.269 | 0.511 | 0.970 | 1.000 | 1 | 1237 |
| REACTOME_INHIBITION_OF_DNA_RECOMBINATION_AT_TELOMERE                                           | 30  | 0.166 | 0.510 | 1.000 | 1.000 | 1 | 2835 |
| REACTOME_TIE2_SIGNALING                                                                        | 13  | 0.209 | 0.507 | 0.978 | 1.000 | 1 | 4442 |
| REACTOME_INTERACTIONS_OF_REV_WITH_HOST_CELLULAR_PROTEINS                                       | 37  | 0.159 | 0.503 | 0.998 | 1.000 | 1 | 2107 |
| REACTOME_SIGNALING_BY_ERB_B2_ECD_MUTANTS                                                       | 13  | 0.201 | 0.502 | 0.987 | 1.000 | 1 | 4118 |
| REACTOME_SNRNP_ASSEMBLY                                                                        | 52  | 0.147 | 0.500 | 0.998 | 1.000 | 1 | 4377 |
| REACTOME_DEUBIQUITINATION                                                                      | 226 | 0.117 | 0.498 | 1.000 | 1.000 | 1 | 3181 |
| REACTOME_ANDROGEN_BIOSYNTHESIS                                                                 | 4   | 0.280 | 0.494 | 0.976 | 1.000 | 1 | 3910 |
| REACTOME_NR1H2_NR1H3_REGULATE_GENE_EXPRESSION_TO_CONTROL_BILE_ACID_HOMEOSTASIS                 | 7   | 0.245 | 0.493 | 0.973 | 1.000 | 1 | 5158 |
| REACTOME_CITRIC_ACID_CYCLE_TCA_CYCLE                                                           | 22  | 0.176 | 0.489 | 0.991 | 1.000 | 1 | 2082 |
| REACTOME_ACTIVATION_OF_ANTERIOR_HOX_GENES_IN_HIND_BRAIN_DEVELOPMENT_DURING_EARLY_EMBRYOGENESIS | 66  | 0.139 | 0.486 | 1.000 | 1.000 | 1 | 3821 |
| REACTOME_ATF6_ATF6_ALPHA_ACTIVATES_CHAPERONE_GENES                                             | 10  | 0.213 | 0.485 | 0.981 | 1.000 | 1 | 4215 |
| REACTOME_APC_CDC20_MEDIATED_DEGRADATION_OF_NEK2A                                               | 26  | 0.165 | 0.484 | 0.995 | 1.000 | 1 | 3892 |

|                                                                                 |    |       |       |       |       |   |       |
|---------------------------------------------------------------------------------|----|-------|-------|-------|-------|---|-------|
| REACTOME_SYNTHESIS_OF_PIP3_AT_THE_EARLY_ENDOSOME_MEMBRANE                       | 15 | 0.187 | 0.482 | 0.984 | 1.000 | 1 | 2243  |
| REACTOME_RNA_POLYMERASE_I_TRANSCRIPTION                                         | 60 | 0.137 | 0.479 | 1.000 | 1.000 | 1 | 3522  |
| REACTOME_ACTIVATION_OF_RAC1_DOWNSTREAM_OF_NMDARS                                | 7  | 0.232 | 0.476 | 0.996 | 1.000 | 1 | 4281  |
| REACTOME_ABERRANT_REGULATION_OF_MITOTIC_EXIT_IN_CANCER_DUE_TO_RB1_DEFECTS       | 20 | 0.169 | 0.469 | 0.996 | 1.000 | 1 | 3783  |
| REACTOME_REGULATION_OF_TP53_ACTIVITY_THROUGH_METHYLATION                        | 19 | 0.170 | 0.461 | 0.993 | 1.000 | 1 | 3170  |
| REACTOME_KSRP_KHSRP_BINDS_AND_DESTABILIZES_MRNA                                 | 17 | 0.171 | 0.455 | 0.997 | 1.000 | 1 | 3199  |
| REACTOME_TRNA_PROCESSING_IN_THE_NUCLEUS                                         | 58 | 0.129 | 0.448 | 1.000 | 1.000 | 1 | 4682  |
| REACTOME_NEGATIVE_EPIGENETIC_REGULATION_OF_RRNA_EXPRESSION                      | 58 | 0.129 | 0.445 | 1.000 | 1.000 | 1 | 11074 |
| REACTOME_RETROGRADE_NEUROTROPHIN_SIGNALLING                                     | 11 | 0.191 | 0.445 | 0.995 | 1.000 | 1 | 10291 |
| REACTOME_NA_CL_DEPENDENT_NEUROTRANSMITTER_TRANSPORTERS                          | 2  | 0.296 | 0.445 | 0.994 | 1.000 | 1 | 3207  |
| REACTOME_NTRK2_ACTIVATES_RAC1                                                   | 3  | 0.275 | 0.441 | 0.996 | 1.000 | 1 | 2419  |
| REACTOME_RECYCLING_OF_EIF2_GDP                                                  | 8  | 0.201 | 0.435 | 0.993 | 1.000 | 1 | 1783  |
| REACTOME_TP53_REGULATES_TRANSCRIPTION_OF_GENES_INVOLVED_IN_G2_CELL_CYCLE_ARREST | 18 | 0.162 | 0.434 | 0.996 | 1.000 | 1 | 2407  |
| REACTOME_SENSING_OF_DNA_DOUBLE_STRAND_BREAKS                                    | 6  | 0.215 | 0.430 | 0.994 | 1.000 | 1 | 4604  |
| REACTOME_P2Y_RECEPTORS                                                          | 3  | 0.256 | 0.426 | 1.000 | 1.000 | 1 | 4466  |
| REACTOME_RNA_POLYMERASE_I_PROMOTER_ESCAPE                                       | 40 | 0.129 | 0.414 | 1.000 | 1.000 | 1 | 11074 |
| REACTOME_MITOCHONDRIAL_FATTY_ACID_BETA_OXIDATION_OF_SATURATED_FATTY_ACIDS       | 8  | 0.187 | 0.412 | 0.998 | 1.000 | 1 | 4992  |
| REACTOME_REGULATION_OF_RUNX3_EXPRESSION_AND_ACTIVITY                            | 55 | 0.115 | 0.401 | 1.000 | 1.000 | 1 | 184   |
| REACTOME_RESPONSE_OF_EIF2AK4_GCN2_TO_AMINO_ACID_DEFICIENCY                      | 97 | 0.092 | 0.352 | 1.000 | 1.000 | 1 | 5937  |
| REACTOME_RETROGRADE_TRANSPORT_AT_THE_TRANS_GOLGI_NETWORK                        | 47 | 0.103 | 0.348 | 1.000 | 1.000 | 1 | 1985  |
| REACTOME_FCERI_MEDIATED_NF_KB_ACTIVATION                                        | 73 | 0.097 | 0.347 | 1.000 | 1.000 | 1 | 4991  |



HS\_siLonp vs siScramble

| NAME                                                                     | SIZE | ES    | NES   | NOM p-val | FDR q-val | FWER p-val | RANK AT MAX |
|--------------------------------------------------------------------------|------|-------|-------|-----------|-----------|------------|-------------|
| REACTOME_NUCLEAR_EVENTS_KINASE_AND_TRANSCRIPTION_FACTOR_ACTIVATION       | 54   | 0.649 | 2.320 | 0.000     | 0.000     | 0.000      | 2088        |
| REACTOME_NGF_STIMULATED_TRANSCRIPTION                                    | 33   | 0.721 | 2.298 | 0.000     | 0.000     | 0.000      | 1589        |
| REACTOME_SRP_DEPENDENT_COTRANSLATIONAL_PROTEIN_TARGETING_TO_MEMBRANE     | 108  | 0.552 | 2.250 | 0.000     | 0.000     | 0.000      | 4689        |
| REACTOME_EUKARYOTIC_TRANSLATION_ELONGATION                               | 89   | 0.568 | 2.201 | 0.000     | 0.000     | 0.000      | 4689        |
| REACTOME KERATINIZATION                                                  | 38   | 0.655 | 2.195 | 0.000     | 0.000     | 0.000      | 1499        |
| REACTOME_ELASTIC_FIBRE_FORMATION                                         | 25   | 0.722 | 2.192 | 0.000     | 0.000     | 0.000      | 1821        |
| REACTOME_EXTRACELLULAR_MATRIX_ORGANIZATION                               | 164  | 0.511 | 2.188 | 0.000     | 0.000     | 0.000      | 1289        |
| REACTOME_ASSEMBLY_AND_CELL_SURFACE_PRESENTATION_OF_NMDA_RECEPTORS        | 24   | 0.696 | 2.109 | 0.000     | 0.002     | 0.010      | 2861        |
| REACTOME_FORMATION_OF_THE_CORNIFIED_ENVELOPE                             | 34   | 0.657 | 2.108 | 0.000     | 0.001     | 0.010      | 1741        |
| REACTOME_RESPONSE_OF_EIF2AK4_GCN2_TO_AMINO_ACID_DEFICIENCY               | 97   | 0.524 | 2.094 | 0.000     | 0.001     | 0.010      | 4689        |
| REACTOME_FORMATION_OF_TUBULIN_FOLDING_INTERMEDIATES_BY_CCTTRIC           | 19   | 0.745 | 2.088 | 0.000     | 0.001     | 0.013      | 1710        |
| REACTOME_MOLECULES_ASSOCIATED_WITH_ELASTIC_FIBRES                        | 19   | 0.734 | 2.072 | 0.000     | 0.002     | 0.015      | 1821        |
| REACTOME_INTEGRIN_CELL_SURFACE_INTERACTIONS                              | 45   | 0.578 | 2.024 | 0.000     | 0.004     | 0.043      | 1119        |
| REACTOME_A_TETRASACCHARIDE_LINKER_SEQUENCE_IS_REQUIRED_FOR_GAG_SYNTHESIS | 15   | 0.772 | 2.012 | 0.000     | 0.005     | 0.058      | 2177        |
| REACTOME_DEGRADATION_OF_THE_EXTRACELLULAR_MATRIX                         | 70   | 0.541 | 2.011 | 0.000     | 0.005     | 0.060      | 1119        |
| REACTOME_RESPONSE_TO_METAL_IONS                                          | 10   | 0.829 | 2.010 | 0.000     | 0.005     | 0.061      | 1424        |
| REACTOME_EUKARYOTIC_TRANSLATION_INITIATION                               | 113  | 0.486 | 1.986 | 0.000     | 0.006     | 0.087      | 4732        |
| REACTOME_METALLOTHIONEIN_BIND_METALS                                     | 8    | 0.874 | 1.983 | 0.000     | 0.007     | 0.092      | 1066        |
| REACTOME_CHONDROITIN_SULFATE_DERMATAN_SULFATE_METABOLISM                 | 36   | 0.598 | 1.977 | 0.000     | 0.007     | 0.103      | 1682        |
| REACTOME_ASSEMBLY_OF_COLLAGEN_FIBRILS_AND_OTHER_MULTIMERIC_STRUCTURES    | 32   | 0.615 | 1.974 | 0.000     | 0.007     | 0.108      | 1289        |

|                                                                                     |     |       |       |       |       |       |      |
|-------------------------------------------------------------------------------------|-----|-------|-------|-------|-------|-------|------|
| REACTOME_DEFECTIVE_B4GALT<br>7_CAUSES_EDS_PROGEROID_TY<br>PE                        | 11  | 0.804 | 1.971 | 0.000 | 0.007 | 0.110 | 2177 |
| REACTOME_SYNDECAN_INTERA<br>CTIONS                                                  | 18  | 0.710 | 1.971 | 0.002 | 0.007 | 0.112 | 2065 |
| REACTOME_SIGNALING_BY_NTR<br>KS                                                     | 113 | 0.484 | 1.966 | 0.000 | 0.007 | 0.122 | 2088 |
| REACTOME DISSOLUTION_OF_FI<br>BRIN_CLOT                                             | 10  | 0.819 | 1.962 | 0.000 | 0.007 | 0.134 | 2250 |
| REACTOME_RESPONSE_TO_ELEV<br>ATED_PLATELET_CYTOSOLIC_CA<br>2_                       | 85  | 0.499 | 1.939 | 0.000 | 0.009 | 0.177 | 2642 |
| REACTOME_COOPERATION_OF_<br>PREFOLDIN_AND_TRIC_CCT_IN_<br>ACTIN_AND_TUBULIN_FOLDING | 26  | 0.633 | 1.934 | 0.000 | 0.010 | 0.190 | 1710 |
| REACTOME_CONSTITUTIVE_SIG<br>NALING_BY_ABERRANT_PI3K_IN<br>_CANCER                  | 39  | 0.579 | 1.934 | 0.000 | 0.009 | 0.190 | 1771 |
| REACTOME_CELL_EXTRACELLUL<br>AR_MATRIX_INTERACTIONS                                 | 17  | 0.703 | 1.924 | 0.000 | 0.011 | 0.223 | 2504 |
| REACTOME_NONSENSE_MEDIAT<br>ED_DECAY_NMD_                                           | 110 | 0.481 | 1.920 | 0.000 | 0.011 | 0.236 | 4689 |
| REACTOME_COLLAGEN_CHAIN_<br>TRIMERIZATION                                           | 15  | 0.712 | 1.918 | 0.000 | 0.011 | 0.240 | 1119 |
| REACTOME_ECM_PROTEOGLYCA<br>NS                                                      | 37  | 0.577 | 1.901 | 0.000 | 0.014 | 0.306 | 2186 |
| REACTOME_ROS_AND_RNS_PRO<br>DUCTION_IN_PHAGOCYTES                                   | 21  | 0.641 | 1.898 | 0.002 | 0.014 | 0.312 | 3485 |
| REACTOME_COLLAGEN_FORMA<br>TION                                                     | 50  | 0.528 | 1.884 | 0.000 | 0.017 | 0.362 | 1289 |
| REACTOME_COLLAGEN_DEGRAD<br>ATION                                                   | 29  | 0.595 | 1.881 | 0.000 | 0.017 | 0.379 | 708  |
| REACTOME_SHC1_EVENTS_IN_E<br>GFR_SIGNALING                                          | 10  | 0.793 | 1.880 | 0.002 | 0.017 | 0.383 | 922  |
| REACTOME_NEUREXINS_AND_N<br>EUROLIGINS                                              | 34  | 0.582 | 1.879 | 0.000 | 0.016 | 0.387 | 2063 |
| REACTOME_CHEMOKINE_RECEP<br>TORS_BIND_CHEMOKINES                                    | 10  | 0.792 | 1.875 | 0.000 | 0.017 | 0.408 | 1549 |
| REACTOME_PLASMA_LIPOPROT<br>EIN_ASSEMBLY                                            | 9   | 0.804 | 1.871 | 0.002 | 0.018 | 0.427 | 406  |
| REACTOME_RECYCLING_PATHW<br>AY_OF_L1                                                | 39  | 0.560 | 1.867 | 0.002 | 0.018 | 0.441 | 1810 |
| REACTOME_NON_INTEGRIN_ME<br>MBRANE_ECM_INTERACTIONS                                 | 37  | 0.559 | 1.858 | 0.000 | 0.020 | 0.479 | 2264 |
| REACTOME_ACTIVATION_OF_A<br>MPK_DOWNSTREAM_OF_NMDA<br>RS                            | 20  | 0.650 | 1.856 | 0.002 | 0.020 | 0.492 | 1710 |
| REACTOME_HEPARAN_SULFATE<br>_HEPARIN_HS_GAG_METABOLIS<br>M                          | 34  | 0.564 | 1.837 | 0.004 | 0.027 | 0.597 | 2418 |
| REACTOME_SIGNALING_BY_REC<br>EPTOR_TYROSINE_KINASES                                 | 377 | 0.387 | 1.813 | 0.000 | 0.036 | 0.719 | 2147 |

|                                                                                                                                |     |       |       |       |       |       |      |
|--------------------------------------------------------------------------------------------------------------------------------|-----|-------|-------|-------|-------|-------|------|
| REACTOME_GAP_JUNCTION_ASS<br>EMBL                                                                                              | 18  | 0.647 | 1.808 | 0.000 | 0.037 | 0.739 | 1710 |
| REACTOME_REGULATION_OF_E<br>XPRESSON_OF_SLITS_AND_ROB<br>OS                                                                    | 156 | 0.424 | 1.807 | 0.000 | 0.037 | 0.740 | 4025 |
| REACTOME_COLLAGEN_BIOSYN<br>THESIS_AND_MODIFYING_ENZY<br>MES                                                                   | 33  | 0.557 | 1.807 | 0.004 | 0.036 | 0.741 | 1728 |
| REACTOME_UPTAKE_AND_ACTI<br>ONS_OF_BACTERIAL_TOXINS                                                                            | 23  | 0.594 | 1.806 | 0.002 | 0.036 | 0.750 | 2848 |
| REACTOME_NEGATIVE_REGULA<br>TION_OF_MAPK_PATHWAY                                                                               | 42  | 0.527 | 1.796 | 0.000 | 0.039 | 0.789 | 4650 |
| REACTOME_RHO_GTPASES_ACTI<br>VATE_IQGAPS                                                                                       | 23  | 0.598 | 1.795 | 0.000 | 0.039 | 0.789 | 1751 |
| REACTOME_TOLL_LIKE_RECEPTO<br>R_TLR1_TLR2_CASCADE                                                                              | 82  | 0.456 | 1.790 | 0.000 | 0.041 | 0.815 | 2936 |
| REACTOME_SELENOAMINO_ACI<br>D_METABOLISM                                                                                       | 107 | 0.445 | 1.785 | 0.002 | 0.043 | 0.832 | 4689 |
| REACTOME_SEALING_OF_THE_N<br>UCLEAR_ENVELOPE_NE_BY_ESC<br>RT_III                                                               | 24  | 0.603 | 1.782 | 0.004 | 0.044 | 0.844 | 3118 |
| REACTOME_ACTIVATION_OF_TH<br>E_MRNA_UPON_BINDING_OF_T<br>HE_CAP_BINDING_COMPLEX_AN<br>D_EIFS_AND_SUBSEQUENT_BIN<br>DING_TO_43S | 56  | 0.483 | 1.756 | 0.002 | 0.058 | 0.908 | 4732 |
| REACTOME_NEGATIVE_REGULA<br>TION_OF_FGFR2_SIGNALING                                                                            | 20  | 0.613 | 1.753 | 0.007 | 0.059 | 0.914 | 2088 |
| REACTOME_GAP_JUNCTION_TR<br>AFFICKING_AND_REGULATION                                                                           | 31  | 0.555 | 1.753 | 0.002 | 0.058 | 0.915 | 1857 |
| REACTOME_NEGATIVE_REGULA<br>TION_OF_FGFR4_SIGNALING                                                                            | 21  | 0.604 | 1.750 | 0.004 | 0.059 | 0.923 | 2088 |
| REACTOME_GRB2_SOS_PROVID<br>ES_LINKAGE_TO_MAPK_SIGNALI<br>NG_FOR_INTEGRINS_                                                    | 11  | 0.692 | 1.748 | 0.013 | 0.059 | 0.926 | 897  |
| REACTOME_RESPONSE_OF_EIF2<br>AK1_HRI_TO_HEME_DEFICIENCY                                                                        | 15  | 0.655 | 1.748 | 0.011 | 0.058 | 0.926 | 2415 |
| REACTOME_PI3K_AKT_SIGNALIN<br>G_IN_CANCER                                                                                      | 66  | 0.473 | 1.747 | 0.002 | 0.058 | 0.931 | 1771 |
| REACTOME_DEFECTIVE_EXT2_C<br>AUSES_EXOSTOSES_2                                                                                 | 10  | 0.748 | 1.745 | 0.007 | 0.059 | 0.935 | 2212 |
| REACTOME_TRANSPORT_OF_CO<br>NNEXONS_TO_THE_PLASMA_M<br>EMBRANE                                                                 | 12  | 0.707 | 1.744 | 0.002 | 0.058 | 0.937 | 1710 |
| REACTOME_SIGNALING_BY_ROB<br>O_RECEPTORS                                                                                       | 191 | 0.400 | 1.743 | 0.000 | 0.058 | 0.940 | 4025 |
| REACTOME_HSP90_CHAPERONE<br>_CYCLE_FOR_STEROID_HORMO<br>NE_RECEPTORS_SHR_                                                      | 44  | 0.507 | 1.741 | 0.005 | 0.059 | 0.944 | 2078 |
| REACTOME_ACTIVATION_OF_N<br>MDA_RECEPTORS_AND_POSTSY<br>NAPTIC_EVENTS                                                          | 63  | 0.459 | 1.723 | 0.002 | 0.070 | 0.973 | 2486 |

|                                                                                 |     |       |       |       |       |       |      |
|---------------------------------------------------------------------------------|-----|-------|-------|-------|-------|-------|------|
| REACTOME_NEGATIVE_REGULATION_OF_THE_PI3K_AKT_NETWORK                            | 70  | 0.464 | 1.722 | 0.000 | 0.070 | 0.975 | 2759 |
| REACTOME_ACETYLCHOLINE_BINDING_AND_DOWNSTREAM_EVENTS                            | 5   | 0.888 | 1.721 | 0.009 | 0.070 | 0.977 | 123  |
| REACTOME_NEGATIVE_REGULATION_OF_FGFR3_SIGNALING                                 | 20  | 0.608 | 1.718 | 0.009 | 0.071 | 0.981 | 2088 |
| REACTOME_POST_TRANSLATIONAL_MODIFICATION_SYNTHESIS_OF_GPI_ANCHORED_PROTEINS     | 40  | 0.509 | 1.713 | 0.007 | 0.075 | 0.984 | 1207 |
| REACTOME_COPI_INDEPENDENT_GOLGI_TO_ER_RETROGRADE_TRAFFIC                        | 41  | 0.506 | 1.710 | 0.005 | 0.076 | 0.986 | 2360 |
| REACTOME_FLT3_SIGNALING                                                         | 217 | 0.385 | 1.707 | 0.000 | 0.077 | 0.989 | 3989 |
| REACTOME_INTERLEUKIN_6_FAMILY_SIGNALING                                         | 14  | 0.646 | 1.707 | 0.011 | 0.075 | 0.989 | 3707 |
| REACTOME_CTLA4_INHIBITORY_SIGNALING                                             | 18  | 0.609 | 1.704 | 0.011 | 0.077 | 0.990 | 2441 |
| REACTOME_NERVOUS_SYSTEM_DEVELOPMENT                                             | 448 | 0.359 | 1.704 | 0.000 | 0.076 | 0.990 | 4044 |
| REACTOME_CELL_SURFACE_INTERACTIONS_AT_THE_VASCULAR_WALL                         | 75  | 0.445 | 1.703 | 0.000 | 0.076 | 0.990 | 1657 |
| REACTOME_P75NTR_NEGATIVELY_REGULATES_CELL_CYCLE_VIA_SC1                         | 5   | 0.859 | 1.697 | 0.004 | 0.079 | 0.992 | 6    |
| REACTOME_CARGO_CONCENTRATION_IN_THE_ER                                          | 31  | 0.531 | 1.696 | 0.009 | 0.079 | 0.992 | 2582 |
| REACTOME_PLATELET_ACTIVATION_SIGNALING_AND_AGGREGATION                          | 167 | 0.400 | 1.695 | 0.000 | 0.079 | 0.992 | 2675 |
| REACTOME_INSULIN_RECEPTOR_RECYCLING                                             | 21  | 0.589 | 1.695 | 0.009 | 0.078 | 0.992 | 3485 |
| REACTOME_MAPK_FAMILY_SIGNALING_CASCADES                                         | 245 | 0.379 | 1.693 | 0.000 | 0.078 | 0.992 | 3989 |
| REACTOME_SIGNALING_BY_EGFR_IN_CANCER                                            | 20  | 0.584 | 1.692 | 0.018 | 0.078 | 0.992 | 2078 |
| REACTOME_HEMOSTASIS                                                             | 385 | 0.359 | 1.690 | 0.000 | 0.079 | 0.993 | 2383 |
| REACTOME_NEUTROPHIL_DEGRANULATION                                               | 342 | 0.359 | 1.687 | 0.000 | 0.081 | 0.994 | 2892 |
| REACTOME_VOLTAGE_GATED_POTASSIUM_CHANNELS                                       | 12  | 0.654 | 1.682 | 0.019 | 0.083 | 0.995 | 513  |
| REACTOME_NEURONAL_SYSTEM                                                        | 196 | 0.387 | 1.680 | 0.000 | 0.084 | 0.996 | 2209 |
| REACTOME_ESTROGEN_DEPENDENT_NUCLEAR_EVENTS_DOWNSTREAM_OF_ESR_MEMBRANE_SIGNALING | 20  | 0.584 | 1.678 | 0.014 | 0.085 | 0.996 | 2026 |
| REACTOME_MAPK_TARGETS_NUCLEAR_EVENTS_MEDIATED_BY_MAP_KINASES                    | 29  | 0.533 | 1.676 | 0.005 | 0.086 | 0.996 | 2088 |

|                                                        |     |       |       |       |       |       |      |
|--------------------------------------------------------|-----|-------|-------|-------|-------|-------|------|
| REACTOME_DERMATAN_SULFATE_BIOSYNTHESIS                 | 5   | 0.861 | 1.670 | 0.002 | 0.090 | 0.997 | 850  |
| REACTOME_ATTENUATION_PHASE                             | 23  | 0.566 | 1.669 | 0.013 | 0.089 | 0.997 | 4503 |
| REACTOME_TOLL_LIKE_RECEPTOR_4_TLR4_CASCADE             | 106 | 0.410 | 1.669 | 0.000 | 0.088 | 0.997 | 2936 |
| REACTOME_RHO_GTPASES_ACTIVATION_CIT                    | 18  | 0.586 | 1.669 | 0.007 | 0.088 | 0.999 | 3725 |
| REACTOME_PEPTIDE_LIGAND_BINDING_RECEPTORS              | 37  | 0.502 | 1.668 | 0.012 | 0.088 | 0.999 | 1549 |
| REACTOME_CHONDROITIN_SULFATE_BIOSYNTHESIS              | 13  | 0.664 | 1.668 | 0.011 | 0.087 | 0.999 | 1010 |
| REACTOME_BASIGIN_INTERACTIONS                          | 19  | 0.588 | 1.665 | 0.013 | 0.089 | 0.999 | 4186 |
| REACTOME_SIGNAL_ATTENUATION                            | 9   | 0.717 | 1.664 | 0.010 | 0.089 | 0.999 | 1544 |
| REACTOME_YAP1_AND_WWTR1_TAZ_STIMULATED_GENE_EXPRESSION | 12  | 0.671 | 1.663 | 0.013 | 0.089 | 0.999 | 2187 |
| REACTOME_CHYLOMICRON_ASSEMBLY                          | 3   | 0.979 | 1.662 | 0.000 | 0.089 | 0.999 | 191  |
| REACTOME_MUSCLE_CONTRACTION                            | 99  | 0.421 | 1.661 | 0.003 | 0.089 | 0.999 | 2515 |
| REACTOME_LGI_ADAM_INTERACTIONS                         | 6   | 0.822 | 1.660 | 0.010 | 0.089 | 0.999 | 1110 |
| REACTOME_ER_TO_GOLGI_ANTEROGRADE_TRANSPORT             | 139 | 0.396 | 1.660 | 0.002 | 0.088 | 0.999 | 2468 |
| REACTOME_NCAM_SIGNALING_FOR_NEURITE_OUT_GROWTH         | 34  | 0.507 | 1.658 | 0.014 | 0.088 | 0.999 | 579  |
| REACTOME_LOSS_OF_FUNCTION_OF_SMAD2_3_IN_CANCER         | 7   | 0.765 | 1.657 | 0.011 | 0.089 | 0.999 | 2988 |
| REACTOME_TYPE_I_HEMIDESMOsome_ASSEMBLY                 | 9   | 0.715 | 1.656 | 0.017 | 0.089 | 0.999 | 2065 |
| REACTOME_PROTEIN_PROTEIN_INTERACTIONS_AT_SYNAPSES      | 50  | 0.468 | 1.653 | 0.005 | 0.090 | 1.000 | 2063 |
| REACTOME_RAB_GERANYLGERANYLATION                       | 48  | 0.470 | 1.653 | 0.003 | 0.090 | 1.000 | 4020 |
| REACTOME_SIGNALING_BY_INTERLEUKINS                     | 302 | 0.360 | 1.648 | 0.000 | 0.093 | 1.000 | 3243 |
| REACTOME_GPCR_LIGAND_BINDING                           | 106 | 0.410 | 1.648 | 0.000 | 0.093 | 1.000 | 1689 |
| REACTOME_CELL_JUNCTION_ORGANIZATION                    | 59  | 0.461 | 1.648 | 0.002 | 0.092 | 1.000 | 1751 |
| REACTOME_POST_CHAPERONIN_TUBULIN_FOLDING_PATHWAY       | 17  | 0.600 | 1.645 | 0.017 | 0.094 | 1.000 | 2421 |
| REACTOME_SIGNALING_BY_INSULIN_RECEPTOR                 | 54  | 0.461 | 1.643 | 0.004 | 0.095 | 1.000 | 3485 |
| REACTOME_HS_GAG_DEGRADATION                            | 17  | 0.601 | 1.637 | 0.025 | 0.099 | 1.000 | 2177 |
| REACTOME_INTERLEUKIN_17_SIGNALING                      | 65  | 0.439 | 1.636 | 0.008 | 0.099 | 1.000 | 2911 |
| REACTOME_RAF_INDEPENDENT_MAPK1_3_ACTIVATION            | 22  | 0.560 | 1.634 | 0.017 | 0.101 | 1.000 | 4416 |

|                                                                                                                                  |     |       |       |       |       |       |      |
|----------------------------------------------------------------------------------------------------------------------------------|-----|-------|-------|-------|-------|-------|------|
| REACTOME_RHO_GTPASES_ACTIVATE_WASPS_AND WAVES                                                                                    | 33  | 0.517 | 1.633 | 0.007 | 0.100 | 1.000 | 3912 |
| REACTOME_SIGNALING_BY_TGF_BETA_RECEPTOR_COMPLEX_IN_CANCER                                                                        | 8   | 0.729 | 1.632 | 0.015 | 0.100 | 1.000 | 3446 |
| REACTOME_NEGATIVE_REGULATION_OF_FGFR1_SIGNALING                                                                                  | 20  | 0.574 | 1.631 | 0.016 | 0.101 | 1.000 | 2088 |
| REACTOME_INTEGRIN_SIGNALING                                                                                                      | 21  | 0.550 | 1.628 | 0.019 | 0.102 | 1.000 | 2038 |
| REACTOME_INFLUENZA_INFECTION                                                                                                     | 151 | 0.381 | 1.625 | 0.000 | 0.106 | 1.000 | 4025 |
| REACTOME_EGFR_DOWNREGULATION                                                                                                     | 25  | 0.534 | 1.621 | 0.014 | 0.108 | 1.000 | 1986 |
| REACTOME_TOLL_LIKE_RECEPTOR_9_TLR9_CASCADE                                                                                       | 85  | 0.418 | 1.620 | 0.005 | 0.108 | 1.000 | 2936 |
| REACTOME_TRANSLOCATION_OF_SLC2A4 GLUT4_TO_THE_PLASMA_MEMBRANE                                                                    | 63  | 0.441 | 1.620 | 0.009 | 0.108 | 1.000 | 3691 |
| REACTOME_GROWTH_HORMONE_RECEPTOR_SIGNALING                                                                                       | 19  | 0.575 | 1.619 | 0.018 | 0.108 | 1.000 | 3480 |
| REACTOME_SIGNALING_BY_PDGFR                                                                                                      | 40  | 0.486 | 1.616 | 0.006 | 0.110 | 1.000 | 846  |
| REACTOME_CELLULAR_RESPONSES_TO_EXTERNAL_STIMULI                                                                                  | 499 | 0.338 | 1.615 | 0.000 | 0.110 | 1.000 | 3576 |
| REACTOME_RHO_GTPASES_ACTIVATE_PKNS                                                                                               | 39  | 0.469 | 1.613 | 0.010 | 0.111 | 1.000 | 3507 |
| REACTOME_REGULATION_OF_TLR_BY_ENDOGENOUS_LIGAND                                                                                  | 5   | 0.822 | 1.613 | 0.010 | 0.111 | 1.000 | 355  |
| REACTOME_REGULATION_OF_INSULIN_LIKE_GROWTH_FACTOR_IGF_TRANSPORT_AND_UPTAKE_BY_INSULIN_LIKE_GROWTH_FACTOR_BINDING_PROTEINS_IGFBPS | 65  | 0.434 | 1.611 | 0.005 | 0.111 | 1.000 | 2249 |
| REACTOME_O_GLYCOSYLATION_OF_TSR_DOMAIN_CONTAINING_PROTEINS                                                                       | 20  | 0.565 | 1.611 | 0.023 | 0.111 | 1.000 | 1450 |
| REACTOME_PLASMA_LIPOPROTEIN_REMODELING                                                                                           | 15  | 0.603 | 1.606 | 0.026 | 0.115 | 1.000 | 1700 |
| REACTOME_TRAF6_MEDIATED_INDUCION_OF_TAK1_COMPLEX_WITHIN_TLR4_COMPLEX                                                             | 14  | 0.619 | 1.604 | 0.031 | 0.117 | 1.000 | 1569 |
| REACTOME_CLASS_A_1_RHODOPSIN_LIKE_RECEPTORS                                                                                      | 65  | 0.428 | 1.603 | 0.007 | 0.117 | 1.000 | 1549 |
| REACTOME_ACTIVATION_OF_IRF3_IRF7_MEDIATED_BY_TBK1_IKK_EPSILON                                                                    | 15  | 0.608 | 1.602 | 0.016 | 0.117 | 1.000 | 1755 |
| REACTOME_TRANSFERRIN_ENDOCYTOSIS_AND_RECYCLING                                                                                   | 26  | 0.531 | 1.602 | 0.019 | 0.116 | 1.000 | 3485 |
| REACTOME_HS_GAG_BIOSYNTHESIS                                                                                                     | 18  | 0.579 | 1.602 | 0.021 | 0.116 | 1.000 | 2820 |
| REACTOME_SPRY_REGULATION_OF_FGF_SIGNALING                                                                                        | 16  | 0.600 | 1.600 | 0.027 | 0.116 | 1.000 | 2088 |

|                                                                                           |     |       |       |       |       |       |      |
|-------------------------------------------------------------------------------------------|-----|-------|-------|-------|-------|-------|------|
| REACTOME_EGFR_INTERACTS_WITH_PHOSPHOLIPASE_C_GAMMA                                        | 5   | 0.831 | 1.599 | 0.020 | 0.117 | 1.000 | 922  |
| REACTOME_ACTIVATION_OF_BAD_AND_TRANSLOCATION_TO_MITOCHONDRIA                              | 15  | 0.596 | 1.599 | 0.039 | 0.116 | 1.000 | 3691 |
| REACTOME_ADVANCED_GLYCOYLATION_ENDPRODUCT_RECEPTOR_SIGNALING                              | 10  | 0.672 | 1.599 | 0.029 | 0.115 | 1.000 | 2936 |
| REACTOME_ION_TRANSPORT_BY_P_TYPE_ATPASES                                                  | 36  | 0.487 | 1.598 | 0.020 | 0.115 | 1.000 | 1427 |
| REACTOME_TOLL_LIKE_RECEPTOR_10_TLR10_CASCADE                                              | 77  | 0.429 | 1.597 | 0.007 | 0.115 | 1.000 | 2936 |
| REACTOME_DEFECTIVE_CHST14_CAUSES_EDS_MUSCULOCONTRACTURAL_TYPE                             | 3   | 0.933 | 1.595 | 0.004 | 0.116 | 1.000 | 850  |
| REACTOME_CREB1_PHOSPHORYLATION_THROUGH_NMDA_RECEPTOR_MEDIATED_ACTIVATION_OF_RAS_SIGNALING | 22  | 0.535 | 1.593 | 0.009 | 0.118 | 1.000 | 649  |
| REACTOME_REGULATION_OF_LOCALIZATION_OF_FOXO_TRANSCRIPTION_FACTORS                         | 12  | 0.639 | 1.590 | 0.033 | 0.121 | 1.000 | 3691 |
| REACTOME_SIGNALLING_TO_ERKS                                                               | 30  | 0.498 | 1.585 | 0.021 | 0.125 | 1.000 | 4322 |
| REACTOME_NEUROTRANSMITTER_RECEPTORS_AND_POSTSYNAPTIC_SIGNAL_TRANSMISSION                  | 109 | 0.393 | 1.585 | 0.002 | 0.125 | 1.000 | 2182 |
| REACTOME_MYD88_INDEPENDENT_TLR4_CASCADE                                                   | 90  | 0.400 | 1.584 | 0.007 | 0.125 | 1.000 | 2936 |
| REACTOME_COPII_MEDIATED_VESICLE_TRANSPORT                                                 | 66  | 0.426 | 1.578 | 0.003 | 0.131 | 1.000 | 2582 |
| REACTOME_COPI_MEDIATED_ANTEROGRADE_TRANSPORT                                              | 88  | 0.399 | 1.575 | 0.008 | 0.133 | 1.000 | 3023 |
| REACTOME_P130CAS_LINKAGE_TO_MAPK_SIGNALING_FOR_INTEGRINS                                  | 11  | 0.647 | 1.574 | 0.037 | 0.133 | 1.000 | 897  |
| REACTOME_TRANSMISSION_ACROSS_CHEMICAL_SYNAPSES                                            | 139 | 0.375 | 1.574 | 0.003 | 0.133 | 1.000 | 2182 |
| REACTOME_GENERATION_OF_SECOND_MESSENGER_MOLECULES                                         | 13  | 0.621 | 1.572 | 0.034 | 0.134 | 1.000 | 1595 |
| REACTOME_OLFACTORY_SIGNALING_PATHWAY                                                      | 8   | 0.712 | 1.569 | 0.024 | 0.136 | 1.000 | 2916 |
| REACTOME_CELL_CELL_COMMUNICATION                                                          | 84  | 0.401 | 1.569 | 0.005 | 0.136 | 1.000 | 1751 |
| REACTOME_DISEASES_OF_GLYCOSYLATION                                                        | 97  | 0.395 | 1.567 | 0.010 | 0.137 | 1.000 | 1630 |
| REACTOME_PLASMA_LIPOPROTEIN_ASSEMBLY_REMODELING_AND_CLEARANCE                             | 47  | 0.450 | 1.564 | 0.004 | 0.140 | 1.000 | 817  |
| REACTOME_SIGNAL_TRANSDUCTION_BY_L1                                                        | 17  | 0.570 | 1.555 | 0.023 | 0.150 | 1.000 | 3355 |

|                                                                                                       |     |       |       |       |       |       |      |
|-------------------------------------------------------------------------------------------------------|-----|-------|-------|-------|-------|-------|------|
| REACTOME_PARASITE_INFECTIO<br>N                                                                       | 48  | 0.444 | 1.554 | 0.017 | 0.151 | 1.000 | 3912 |
| REACTOME_PYRIMIDINE_SALVA<br>GE                                                                       | 8   | 0.682 | 1.551 | 0.041 | 0.153 | 1.000 | 2256 |
| REACTOME_AGGREPHAGY                                                                                   | 32  | 0.485 | 1.549 | 0.029 | 0.154 | 1.000 | 2078 |
| REACTOME_WNT_LIGAND_BIOG<br>ENESIS_AND_TRAFFICKING                                                    | 13  | 0.591 | 1.545 | 0.036 | 0.159 | 1.000 | 617  |
| REACTOME_DEFECTIVE_CHST3_<br>CAUSES_SEDCJD                                                            | 3   | 0.921 | 1.543 | 0.008 | 0.161 | 1.000 | 1010 |
| REACTOME_IMMUNOREGULATO<br>RY_INTERACTIONS_BETWEEN_A<br>_LYMPHOID_AND_A_NON_LYM<br>PHOID_CELL         | 29  | 0.484 | 1.543 | 0.026 | 0.161 | 1.000 | 1740 |
| REACTOME_ACTIVATION_OF_TH<br>E_AP_1_FAMILY_OF_TRANSCRIP<br>TION_FACTORS                               | 9   | 0.680 | 1.539 | 0.047 | 0.165 | 1.000 | 1028 |
| REACTOME_REVERSIBLE_HYDRA<br>TION_OF CARBON_DIOXIDE                                                   | 7   | 0.715 | 1.529 | 0.031 | 0.177 | 1.000 | 2164 |
| REACTOME_TP53_REGULATES_<br>METABOLIC_GENES                                                           | 81  | 0.397 | 1.528 | 0.012 | 0.177 | 1.000 | 3381 |
| REACTOME_TGF_BETA_RECEPTO<br>R_SIGNALING_ACTIVATES_SMAD<br>S                                          | 32  | 0.473 | 1.527 | 0.034 | 0.178 | 1.000 | 3779 |
| REACTOME_CLASS_C_3_METAB<br>OTROPIC_Glutamate_PHEROM<br>ONE_RECEPTORS_                                | 3   | 0.908 | 1.526 | 0.012 | 0.178 | 1.000 | 782  |
| REACTOME_MAP2K_AND_MAPK<br>_ACTIVATION                                                                | 35  | 0.456 | 1.524 | 0.035 | 0.180 | 1.000 | 1751 |
| REACTOME_COMPLEMENT_CAS<br>CADE                                                                       | 15  | 0.575 | 1.522 | 0.037 | 0.182 | 1.000 | 2284 |
| REACTOME_DISEASES_OF_SIGN<br>AL_TRANSDUCTION_BY_GROWT<br>H_FACTOR_RECEPTORS_AND_SE<br>COND_MESSENGERS | 329 | 0.328 | 1.520 | 0.000 | 0.184 | 1.000 | 3989 |
| REACTOME_REGULATION_OF_G<br>LYCOLYSIS_BY_FRUCTOSE_2_6_B<br>ISPHOSPHATE_METABOLISM                     | 10  | 0.641 | 1.520 | 0.043 | 0.183 | 1.000 | 2666 |
| REACTOME_TP53_REGULATES_T<br>RANSCRIPTION_OF_GENES_INV<br>OLVED_IN_CYTOCHROME_C_REL<br>EASE           | 18  | 0.543 | 1.520 | 0.034 | 0.182 | 1.000 | 2991 |
| REACTOME_SYNAPTIC_ADHESIO<br>N_LIKE_MOLECULES                                                         | 14  | 0.575 | 1.520 | 0.043 | 0.182 | 1.000 | 3181 |
| REACTOME_IL_6_TYPE_CYTOKIN<br>E_RECEPTOR_LIGAND_INTERACT<br>IONS                                      | 8   | 0.686 | 1.516 | 0.046 | 0.186 | 1.000 | 1206 |
| REACTOME_ACTIVATION_OF_C3<br>_AND_C5                                                                  | 5   | 0.773 | 1.512 | 0.045 | 0.191 | 1.000 | 2284 |
| REACTOME_HDL_REMODELING                                                                               | 4   | 0.833 | 1.511 | 0.032 | 0.191 | 1.000 | 1370 |
| REACTOME_GAB1_SIGNALOSOM<br>E                                                                         | 12  | 0.617 | 1.510 | 0.060 | 0.192 | 1.000 | 922  |

|                                                                                              |     |       |       |       |       |       |      |
|----------------------------------------------------------------------------------------------|-----|-------|-------|-------|-------|-------|------|
| REACTOME_CREB_PHOSPHORYLATION                                                                | 7   | 0.698 | 1.509 | 0.058 | 0.191 | 1.000 | 1445 |
| REACTOME_HSF1_DEPENDENT_TRANSACTIVATION                                                      | 31  | 0.470 | 1.507 | 0.031 | 0.194 | 1.000 | 4731 |
| REACTOME_RUNX1_REGULATES_TRANSCRIPTION_OF_GENES_INVOLVED_IN_DIFFERENTIATION_OF_MYELOID_CELLS | 5   | 0.762 | 1.506 | 0.049 | 0.194 | 1.000 | 2775 |
| REACTOME_PHYSIOLOGICAL_FACTORS                                                               | 7   | 0.692 | 1.506 | 0.055 | 0.193 | 1.000 | 2187 |
| REACTOME_MATURATION_OF_SPIKE_PROTEIN                                                         | 5   | 0.784 | 1.504 | 0.044 | 0.196 | 1.000 | 229  |
| REACTOME_NUCLEOTIDE_SALVAGE                                                                  | 19  | 0.538 | 1.502 | 0.039 | 0.198 | 1.000 | 2256 |
| REACTOME_INTERLEUKIN_4_AND_INTERLEUKIN_13_SIGNALING                                          | 62  | 0.413 | 1.501 | 0.024 | 0.198 | 1.000 | 1678 |
| REACTOME_ION_CHANNEL_TRANSPORT                                                               | 111 | 0.370 | 1.499 | 0.005 | 0.199 | 1.000 | 2641 |
| REACTOME_REGULATION_OF_GENE_EXPRESSION_BY_HYPOXIA_INDUCIBLE_FACTOR                           | 9   | 0.652 | 1.495 | 0.045 | 0.204 | 1.000 | 3280 |
| REACTOME_HIGHLY_CALCIIUM_PERMEABLE_NICOTINIC_ACETYLCHOLINE_RECEPTORS                         | 4   | 0.811 | 1.493 | 0.049 | 0.206 | 1.000 | 99   |
| REACTOME_INTERLEUKIN_12_FAMILY_SIGNALING                                                     | 42  | 0.431 | 1.492 | 0.037 | 0.207 | 1.000 | 4097 |
| REACTOME_VITAMIN_C_ASCORBATE_METABOLISM                                                      | 7   | 0.700 | 1.491 | 0.045 | 0.208 | 1.000 | 3079 |
| REACTOME_FOXO_MEDIATED_TRANSCRIPTION_OF_CELL_CYCLE_GENES                                     | 16  | 0.539 | 1.488 | 0.058 | 0.211 | 1.000 | 1909 |
| REACTOME_SIGNALING_BY_MIRAS_COMPLEX_MUTANTS                                                  | 8   | 0.662 | 1.487 | 0.055 | 0.211 | 1.000 | 3789 |
| REACTOME_INTERLEUKIN_10_SIGNALING                                                            | 18  | 0.539 | 1.486 | 0.049 | 0.212 | 1.000 | 1229 |
| REACTOME_SCAVENGING_BY_CLASS_F_RECEPTORS                                                     | 4   | 0.806 | 1.482 | 0.048 | 0.217 | 1.000 | 2078 |
| REACTOME_UPTAKE_AND_FUNCTION_OF_DIPHTHERIA_TOXIN                                             | 6   | 0.734 | 1.482 | 0.050 | 0.216 | 1.000 | 2078 |
| REACTOME_NR1H3_NR1H2_REGULATE_GENE_EXPRESSION_LINKED_TO_CHOLESTEROL_TRANSPORT_AND_EFFLUX     | 31  | 0.460 | 1.482 | 0.036 | 0.216 | 1.000 | 2974 |
| REACTOME_PLATELET_AGGREGATION_PLUG_FORMATION                                                 | 24  | 0.491 | 1.481 | 0.058 | 0.216 | 1.000 | 2038 |
| REACTOME_HIGHLY_CALCIIUM_PERMEABLE_POSTSYNAPTIC_NICOTINIC_ACETYLCHOLINE_RECEPTORS            | 4   | 0.811 | 1.481 | 0.045 | 0.215 | 1.000 | 99   |
| REACTOME_PEPTIDE_HORMONE_BIOSYNTHESIS                                                        | 3   | 0.905 | 1.480 | 0.021 | 0.214 | 1.000 | 562  |
| REACTOME_P75NTR_REGULATES_AXONOGENESIS                                                       | 5   | 0.751 | 1.479 | 0.061 | 0.215 | 1.000 | 6    |

|                                                                        |     |       |       |       |       |       |      |
|------------------------------------------------------------------------|-----|-------|-------|-------|-------|-------|------|
| REACTOME_INFECTION_WITH_MYCOBACTERIUM_TUBERCULOSIS                     | 23  | 0.499 | 1.477 | 0.052 | 0.217 | 1.000 | 2576 |
| REACTOME_UREA_CYCLE                                                    | 5   | 0.761 | 1.476 | 0.042 | 0.219 | 1.000 | 572  |
| REACTOME_DEFECTIVE_CHSY1_CAUSES_TPBS                                   | 3   | 0.879 | 1.475 | 0.022 | 0.219 | 1.000 | 354  |
| REACTOME_PECAM1_INTERACTIONS                                           | 10  | 0.615 | 1.475 | 0.072 | 0.218 | 1.000 | 862  |
| REACTOME_GOLGI_TO_ER_RETROGRADE_TRANSPORT                              | 118 | 0.360 | 1.472 | 0.017 | 0.222 | 1.000 | 2582 |
| REACTOME_COPI_DEPENDENT_GOLGI_TO_ER_RETROGRADE_TRAFFIC                 | 88  | 0.377 | 1.469 | 0.018 | 0.226 | 1.000 | 2582 |
| REACTOME_AKT_PHOSPHORYLATES_TARGETS_IN_THE_NUCLEUS                     | 10  | 0.625 | 1.467 | 0.072 | 0.228 | 1.000 | 2117 |
| REACTOME_RESPONSE_OF_MTB_TO_PHAGOCYTOSIS                               | 21  | 0.511 | 1.467 | 0.068 | 0.228 | 1.000 | 2576 |
| REACTOME_ERK_MAPK_TARGETS                                              | 21  | 0.503 | 1.465 | 0.048 | 0.230 | 1.000 | 2574 |
| REACTOME_GASTRIN_CREB_SIGNALING_PATHWAY_VIA_PKC_AND_MAPK               | 14  | 0.558 | 1.464 | 0.059 | 0.231 | 1.000 | 649  |
| REACTOME_NEGATIVE_FEEDBACK_REGULATION_OF_MAPK_PATHWAY                  | 6   | 0.704 | 1.462 | 0.055 | 0.231 | 1.000 | 1476 |
| REACTOME_REGULATION_OF_IFNG_SIGNALING                                  | 13  | 0.579 | 1.461 | 0.055 | 0.232 | 1.000 | 4357 |
| REACTOME_TRANSPORT_TO_THE_GOLGI_AND_SUBSEQUENT_MODIFICATION            | 159 | 0.341 | 1.461 | 0.013 | 0.231 | 1.000 | 2582 |
| REACTOME_EPHRIN_SIGNALING                                              | 17  | 0.532 | 1.461 | 0.063 | 0.231 | 1.000 | 2694 |
| REACTOME_ATF6_ATF6_ALPHA_ACTIVATES_CHAPERONES                          | 12  | 0.580 | 1.459 | 0.070 | 0.232 | 1.000 | 4029 |
| REACTOME_REGULATION_OF_COMMISSURAL_AXON_PATHFINDING_BY_SLIT_AND_ROBO   | 4   | 0.802 | 1.459 | 0.044 | 0.231 | 1.000 | 1185 |
| REACTOME_IKK_COMPLEX_RECRUITMENT_MEDIATED_BY_RIP1                      | 21  | 0.500 | 1.458 | 0.066 | 0.232 | 1.000 | 1722 |
| REACTOME_DISEASES_ASSOCIATED_WITH_GLYCOSAMINOGLYCAN_METABOLISM         | 27  | 0.466 | 1.457 | 0.049 | 0.232 | 1.000 | 2212 |
| REACTOME_L1CAM_INTERACTIONS                                            | 84  | 0.383 | 1.455 | 0.025 | 0.235 | 1.000 | 1959 |
| REACTOME_PTK6_REGULATES_RHO_GTPASES_RAS_GTPASE_AND_MAP_KINASES         | 13  | 0.562 | 1.452 | 0.088 | 0.238 | 1.000 | 4150 |
| REACTOME_SHC_MEDIATED_CASCADE_FGFR4                                    | 10  | 0.598 | 1.452 | 0.065 | 0.238 | 1.000 | 1020 |
| REACTOME_DEFECTIVE_C1GALT1C1_CAUSES_TN_POLYAGGLUTINATION_SYNDROME_TNPS | 5   | 0.753 | 1.451 | 0.054 | 0.239 | 1.000 | 3026 |

|                                                                                                                                                                   |     |       |       |       |       |       |      |
|-------------------------------------------------------------------------------------------------------------------------------------------------------------------|-----|-------|-------|-------|-------|-------|------|
| REACTOME_DISEASES_OF_META<br>BOLISM                                                                                                                               | 165 | 0.340 | 1.450 | 0.009 | 0.238 | 1.000 | 2234 |
| REACTOME_PRESYNAPTIC_DEPO<br>LARIZATION_AND_CALCIIUM_CH<br>ANNEL_OPENING                                                                                          | 4   | 0.789 | 1.450 | 0.053 | 0.238 | 1.000 | 635  |
| REACTOME_NEGATIVE_REGULA<br>TION_OF_TCF_DEPENDENT_SIG<br>NALING_BY_WNT_LIGAND_ANT<br>AGONISTS                                                                     | 5   | 0.748 | 1.450 | 0.079 | 0.238 | 1.000 | 27   |
| REACTOME_RSK_ACTIVATION                                                                                                                                           | 7   | 0.670 | 1.449 | 0.056 | 0.237 | 1.000 | 649  |
| REACTOME_INSULIN_RECEPTOR<br>_SIGNALING_CASCADE                                                                                                                   | 34  | 0.449 | 1.448 | 0.047 | 0.238 | 1.000 | 1544 |
| REACTOME_IONOTROPIC_ACTIVI<br>TY_OF_KAINATE_RECEPTORS                                                                                                             | 6   | 0.711 | 1.447 | 0.060 | 0.239 | 1.000 | 2486 |
| REACTOME_VISUAL_PHOTOTRA<br>NSDUCTION                                                                                                                             | 47  | 0.418 | 1.447 | 0.042 | 0.239 | 1.000 | 2414 |
| REACTOME_DOWNREGULATION<br>_OF_TGF_BETA_RECEPTOR_SIGN<br>ALING                                                                                                    | 26  | 0.473 | 1.446 | 0.049 | 0.239 | 1.000 | 3229 |
| REACTOME_EXTRA_NUCLEAR_E<br>STROGEN_SIGNALING                                                                                                                     | 52  | 0.412 | 1.446 | 0.033 | 0.238 | 1.000 | 2180 |
| REACTOME_CD28_DEPENDENT_<br>VAV1_PATHWAY                                                                                                                          | 8   | 0.640 | 1.444 | 0.075 | 0.240 | 1.000 | 2378 |
| REACTOME_VLDL_ASSEMBLY                                                                                                                                            | 2   | 0.951 | 1.441 | 0.012 | 0.244 | 1.000 | 406  |
| REACTOME_DISEASES_ASSOCIAT<br>ED_WITH_O_GLYCOSYLATION_O<br>F_PROTEINS                                                                                             | 36  | 0.440 | 1.438 | 0.060 | 0.247 | 1.000 | 1630 |
| REACTOME_THE_ROLE_OF_GTSE<br>1_IN_G2_M_PROGRESSION_AFT<br>ER_G2_CHECKPOINT                                                                                        | 69  | 0.381 | 1.438 | 0.031 | 0.247 | 1.000 | 4312 |
| REACTOME_TP53_REGULATES_T<br>RANSCRIPTION_OF_SEVERAL_AD<br>DITIONAL_CELL_DEATH_GENES_<br>WHOSE_SPECIFIC_ROLES_IN_P5<br>3_DEPENDENT_APOPTOSIS_REM<br>AIN_UNCERTAIN | 12  | 0.574 | 1.435 | 0.088 | 0.251 | 1.000 | 2991 |
| REACTOME_NCAM1_INTERACTI<br>ONS                                                                                                                                   | 15  | 0.540 | 1.434 | 0.092 | 0.251 | 1.000 | 579  |
| REACTOME_STRIATED_MUSCLE_<br>CONTRACTION                                                                                                                          | 15  | 0.538 | 1.433 | 0.077 | 0.252 | 1.000 | 1318 |
| REACTOME_IRS_ACTIVATION                                                                                                                                           | 4   | 0.772 | 1.432 | 0.068 | 0.252 | 1.000 | 1544 |
| REACTOME_RAS_ACTIVATION_U<br>PON_CA2_INFLUX_THROUGH_N<br>MDA_RECEPTOR                                                                                             | 14  | 0.538 | 1.431 | 0.068 | 0.253 | 1.000 | 3953 |
| REACTOME_SIGNALING_BY_FGF<br>R1                                                                                                                                   | 33  | 0.446 | 1.429 | 0.068 | 0.256 | 1.000 | 2125 |
| REACTOME_FORMATION_OF_FI<br>BRIN_CLOT_CLOTTING_CASCADE                                                                                                            | 18  | 0.513 | 1.429 | 0.086 | 0.254 | 1.000 | 1233 |
| REACTOME_TOLL_LIKE_RECEPTO<br>R_CASCADES                                                                                                                          | 121 | 0.348 | 1.428 | 0.020 | 0.255 | 1.000 | 2936 |

|                                                                                             |     |       |       |       |       |       |      |
|---------------------------------------------------------------------------------------------|-----|-------|-------|-------|-------|-------|------|
| REACTOME_HIGHLY_SODIUM_P<br>ERMEABLE_POSTSYNAPTIC_ACE<br>TYLCHOLINE_NICOTINIC_RECEPT<br>ORS | 2   | 0.947 | 1.427 | 0.012 | 0.255 | 1.000 | 123  |
| REACTOME_GPVI_MEDIATED_A<br>CTIVATION_CASCADE                                               | 24  | 0.466 | 1.425 | 0.043 | 0.258 | 1.000 | 3621 |
| REACTOME_RAF_ACTIVATION                                                                     | 32  | 0.450 | 1.424 | 0.034 | 0.259 | 1.000 | 4331 |
| REACTOME_NADE_MODULATES<br>_DEATH_SIGNALLING                                                | 5   | 0.744 | 1.423 | 0.079 | 0.259 | 1.000 | 6    |
| REACTOME_PHENYLALANINE_A<br>ND_TYROSINE_METABOLISM                                          | 7   | 0.662 | 1.423 | 0.111 | 0.259 | 1.000 | 3191 |
| REACTOME_SIGNALLING_TO_P3<br>8_VIA_RIT_AND_RIN                                              | 2   | 0.920 | 1.422 | 0.031 | 0.260 | 1.000 | 490  |
| REACTOME_MET_RECEPTOR_AC<br>TIVATION                                                        | 4   | 0.781 | 1.421 | 0.074 | 0.261 | 1.000 | 2790 |
| REACTOME_NOTCH2_ACTIVATIO<br>N_AND_TRANSMISSION_OF_SIG<br>NAL_TO_THE_NUCLEUS                | 20  | 0.486 | 1.420 | 0.080 | 0.260 | 1.000 | 1569 |
| REACTOME_INTERLEUKIN_7_SIG<br>NALING                                                        | 16  | 0.528 | 1.416 | 0.070 | 0.266 | 1.000 | 56   |
| REACTOME_CARDIAC_CONDUCT<br>ION                                                             | 65  | 0.387 | 1.415 | 0.031 | 0.268 | 1.000 | 1376 |
| REACTOME_RESPIRATORY_ELEC<br>TRON_TRANSPORT                                                 | 90  | 0.363 | 1.412 | 0.041 | 0.271 | 1.000 | 4134 |
| REACTOME_ESR_MEDIATED_SIG<br>NALING                                                         | 142 | 0.334 | 1.412 | 0.016 | 0.270 | 1.000 | 2236 |
| REACTOME_SIGNALING_BY_FGF<br>R4                                                             | 30  | 0.453 | 1.411 | 0.059 | 0.272 | 1.000 | 2088 |
| REACTOME_SIGNALING_BY_GPC<br>R                                                              | 314 | 0.305 | 1.411 | 0.003 | 0.271 | 1.000 | 1715 |
| REACTOME_INITIAL_TRIGGERIN<br>G_OF_COMPLEMENT                                               | 7   | 0.662 | 1.409 | 0.089 | 0.272 | 1.000 | 2284 |
| REACTOME_IRAK4_DEFICIENCY_<br>TLR2_4_                                                       | 5   | 0.717 | 1.407 | 0.082 | 0.275 | 1.000 | 317  |
| REACTOME_DEFECTIVE_FACTOR<br>_IX_CAUSES_HEMOPHILIA_B                                        | 3   | 0.830 | 1.406 | 0.066 | 0.276 | 1.000 | 333  |
| REACTOME_MET_ACTIVATES_PT<br>K2_SIGNALING                                                   | 20  | 0.499 | 1.406 | 0.073 | 0.275 | 1.000 | 1771 |
| REACTOME_GLYCOSAMINOGLYC<br>AN_METABOLISM                                                   | 85  | 0.366 | 1.404 | 0.045 | 0.277 | 1.000 | 2212 |
| REACTOME_FGFR3B_LIGAND_BI<br>NDING_AND_ACTIVATION                                           | 3   | 0.820 | 1.401 | 0.088 | 0.281 | 1.000 | 1136 |
| REACTOME_POTASSIUM_CHAN<br>NELS                                                             | 33  | 0.441 | 1.399 | 0.069 | 0.284 | 1.000 | 2318 |
| REACTOME_CREATION_OF_C4_<br>AND_C2_ACTIVATORS                                               | 2   | 0.933 | 1.399 | 0.048 | 0.283 | 1.000 | 848  |
| REACTOME_PTK6_PROMOTES_H<br>IF1A_STABILIZATION                                              | 3   | 0.845 | 1.396 | 0.070 | 0.287 | 1.000 | 1421 |
| REACTOME_METABOLISM_OF_F<br>AT_SOLUBLE_VITAMINS                                             | 27  | 0.460 | 1.395 | 0.091 | 0.287 | 1.000 | 2414 |
| REACTOME_EXTRINSIC_PATHWA<br>Y_OF_FIBRIN_CLOT_FORMATIO<br>N                                 | 4   | 0.760 | 1.393 | 0.095 | 0.291 | 1.000 | 889  |

|                                                                                   |     |       |       |       |       |       |      |
|-----------------------------------------------------------------------------------|-----|-------|-------|-------|-------|-------|------|
| REACTOME_RUNX2_REGULATES_GENES_INVOLVED_IN_CELL_MIGRATION                         | 6   | 0.681 | 1.392 | 0.107 | 0.291 | 1.000 | 3691 |
| REACTOME_LAMININ_INTERACTIONS                                                     | 22  | 0.465 | 1.390 | 0.086 | 0.294 | 1.000 | 1289 |
| REACTOME_SELECTIVE_AUTOPHAGY                                                      | 69  | 0.371 | 1.389 | 0.049 | 0.294 | 1.000 | 2103 |
| REACTOME_INTERLEUKIN_6_SIGNALING                                                  | 10  | 0.570 | 1.388 | 0.104 | 0.296 | 1.000 | 3707 |
| REACTOME_CROSS_PRESENTATION_OF_PARTICULATE_EXOGENOUS_ANTIGENS_PHAGOSOMES          | 3   | 0.810 | 1.387 | 0.098 | 0.296 | 1.000 | 1792 |
| REACTOME_ABC_TRANSPORTERS_IN_LIPID_HOMEOSTASIS                                    | 9   | 0.590 | 1.387 | 0.114 | 0.295 | 1.000 | 2740 |
| REACTOME_SHC_MEDIATED_CASCADE_FGFR3                                               | 9   | 0.595 | 1.386 | 0.110 | 0.296 | 1.000 | 1136 |
| REACTOME_SIGNALING_BY_LEPTIN                                                      | 10  | 0.577 | 1.386 | 0.117 | 0.295 | 1.000 | 3480 |
| REACTOME_DEFECTS_OF_CONTACT_ACTIVATION_SYSTEM_CASCADE_AND_KALLIKREIN_KININ_SYSTEM | 8   | 0.626 | 1.386 | 0.117 | 0.294 | 1.000 | 1170 |
| REACTOME_COMMON_PATHWAY_OF_FIBRIN_CLOT_FORMATION                                  | 11  | 0.556 | 1.381 | 0.119 | 0.302 | 1.000 | 1233 |
| REACTOME_RHO_GTPASES_ACTIVATE_ROCKS                                               | 18  | 0.501 | 1.380 | 0.084 | 0.302 | 1.000 | 3725 |
| REACTOME_NEGATIVE_REGULATION_OF_NMDA_RECEPTOR_MEDIATED_NEURONAL_TRANSMISSION      | 12  | 0.547 | 1.379 | 0.097 | 0.303 | 1.000 | 2486 |
| REACTOME_FGFR1_MODULATION_OF_FGFR1_SIGNALING                                      | 5   | 0.699 | 1.379 | 0.106 | 0.303 | 1.000 | 2125 |
| REACTOME_SMOOTH_MUSCLE_CONTRACTION                                                | 25  | 0.456 | 1.378 | 0.088 | 0.303 | 1.000 | 1792 |
| REACTOME_COSTIMULATION_BY_THE_CD28_FAMILY                                         | 44  | 0.395 | 1.377 | 0.069 | 0.304 | 1.000 | 2441 |
| REACTOME_INTERLEUKIN_2_SIGNALING                                                  | 7   | 0.648 | 1.377 | 0.113 | 0.303 | 1.000 | 1162 |
| REACTOME_HSF1_ACTIVATION                                                          | 26  | 0.450 | 1.376 | 0.092 | 0.303 | 1.000 | 3861 |
| REACTOME_RHO_GTPASE_EFFECTORS                                                     | 241 | 0.307 | 1.376 | 0.013 | 0.303 | 1.000 | 3639 |
| REACTOME_MISSPLICED_LRP5_MUTANTS_HAVE_ENHANCED_BETA_CATENIN_DEPENDENT_SIGNALING   | 4   | 0.753 | 1.376 | 0.112 | 0.302 | 1.000 | 27   |
| REACTOME_RHO_GTPASES_ACTIVATE_PAKS                                                | 19  | 0.484 | 1.375 | 0.111 | 0.302 | 1.000 | 3943 |
| REACTOME_SPERM_MOTILITY_AND_TAXES                                                 | 2   | 0.920 | 1.374 | 0.040 | 0.303 | 1.000 | 152  |
| REACTOME_RESPIRATORY_ELECTRON_TRANSPORT_ATP_SYNTHESIS_BY_CHEMIOSMOTIC_COUPLING    | 110 | 0.338 | 1.373 | 0.029 | 0.304 | 1.000 | 4134 |

|                                                                         |     |       |       |       |       |       |      |
|-------------------------------------------------------------------------|-----|-------|-------|-------|-------|-------|------|
| NG_AND_HEAT_PRODUCTION_BY_UNCOUPLING_PROTEINS_REACTOME_TCR_SIGNALING    | 94  | 0.344 | 1.372 | 0.034 | 0.304 | 1.000 | 4312 |
| REACTOME_UPTAKE_AND_FUNCTION_OF_ANTHRAX_TOXINS                          | 11  | 0.564 | 1.370 | 0.106 | 0.307 | 1.000 | 3943 |
| REACTOME_SYNTHESIS_OF_ACTIVE_UBIQUITIN_ROLES_OF_E1_AND_E2_ENZYMES       | 30  | 0.439 | 1.370 | 0.084 | 0.307 | 1.000 | 4884 |
| REACTOME_NOSTRIN_MEDIATED_ENOS_TRAFFICKING                              | 3   | 0.809 | 1.368 | 0.111 | 0.308 | 1.000 | 206  |
| REACTOME_INTERLEUKIN_3_INTERLEUKIN_5_AND_GM-CSF_SIGNALING               | 34  | 0.415 | 1.366 | 0.063 | 0.311 | 1.000 | 3779 |
| REACTOME_DEFECTIVE_FACTOR_VIII_CAUSES_HEMOPHILIA_A                      | 6   | 0.661 | 1.365 | 0.118 | 0.311 | 1.000 | 1170 |
| REACTOME_ACTIVATION_OF_THE_PHOTOTRANSDUCTION_CASCADE                    | 2   | 0.878 | 1.365 | 0.086 | 0.312 | 1.000 | 232  |
| REACTOME_RECEPTOR_MEDIATED_MITOPHAGY                                    | 11  | 0.561 | 1.364 | 0.114 | 0.312 | 1.000 | 3677 |
| REACTOME_PLATELET_SENSITIZATION_BY_LDL                                  | 13  | 0.535 | 1.363 | 0.135 | 0.313 | 1.000 | 3243 |
| REACTOME_UNFOLDED_PROTEIN_RESPONSE_UPR                                  | 87  | 0.344 | 1.360 | 0.051 | 0.317 | 1.000 | 2571 |
| REACTOME_PLASMA_LIPOPROTEIN_CLEARANCE                                   | 27  | 0.445 | 1.360 | 0.099 | 0.316 | 1.000 | 817  |
| REACTOME_IRON_UPTAKE_AND_TRANSPORT                                      | 47  | 0.394 | 1.359 | 0.073 | 0.318 | 1.000 | 3808 |
| REACTOME_SEMAPHORIN_INTERACTIONS                                        | 51  | 0.381 | 1.358 | 0.064 | 0.317 | 1.000 | 2416 |
| REACTOME_MYOGENESIS                                                     | 16  | 0.503 | 1.358 | 0.098 | 0.317 | 1.000 | 3680 |
| REACTOME_P38MAPK_EVENTS                                                 | 13  | 0.532 | 1.357 | 0.104 | 0.317 | 1.000 | 4269 |
| REACTOME_CELLULAR_RESPONSE_TO_HYPOXIA                                   | 70  | 0.361 | 1.357 | 0.048 | 0.316 | 1.000 | 4312 |
| REACTOME_ACTIVATED_TAK1_MEDIATES_P38_MAPK_ACTIVATION                    | 23  | 0.454 | 1.355 | 0.095 | 0.320 | 1.000 | 1873 |
| REACTOME_ERYTHROPOIETIN_ACTIVATES_RAS                                   | 13  | 0.523 | 1.354 | 0.120 | 0.320 | 1.000 | 3953 |
| REACTOME_CLATHRIN_MEDIATED_ENDOCYTOSIS                                  | 116 | 0.333 | 1.352 | 0.035 | 0.323 | 1.000 | 3973 |
| REACTOME_EGR2_AND_SOX10_MEDIATED_INITIATION_OF_SCHWANN_CELL_MYELINATION | 24  | 0.450 | 1.351 | 0.106 | 0.323 | 1.000 | 1124 |
| REACTOME_CHYLOMICRON_MODELING                                           | 1   | 0.993 | 1.351 | 0.020 | 0.323 | 1.000 | 88   |
| REACTOME_SIGNALING_BY_MET                                               | 63  | 0.363 | 1.351 | 0.073 | 0.322 | 1.000 | 3953 |
| REACTOME_METABOLISM_OF_ANGIOTENSINOGEN_TO_ANGIOTENSINS                  | 7   | 0.636 | 1.348 | 0.141 | 0.326 | 1.000 | 2450 |
| REACTOME_IRE1ALPHA_ACTIVATES_CHAPERONES                                 | 47  | 0.384 | 1.347 | 0.081 | 0.327 | 1.000 | 2571 |

|                                                                            |       |       |       |       |       |       |      |
|----------------------------------------------------------------------------|-------|-------|-------|-------|-------|-------|------|
| REACTOME_ATF6_ATF6_ALPHA_ACTIVATES_CHAPERONE_GENES                         | 10    | 0.570 | 1.347 | 0.140 | 0.326 | 1.000 | 4029 |
| REACTOME_SIGNALING_BY_ERB<br>B4                                            | 38    | 0.406 | 1.345 | 0.080 | 0.328 | 1.000 | 1569 |
| REACTOME_PTK6_REGULATES_R<br>TKS_AND_THEIR_EFFECTORS_AK<br>T1_AND_DOK1     | 9     | 0.574 | 1.345 | 0.129 | 0.328 | 1.000 | 3779 |
| REACTOME_FGFR2_MUTANT_RE<br>CEPTOR_ACTIVATION                              | 19    | 0.471 | 1.344 | 0.115 | 0.328 | 1.000 | 2357 |
| REACTOME_PROLONGED_ERK_A<br>CTIVATION_EVENTS                               | 12    | 0.534 | 1.343 | 0.121 | 0.330 | 1.000 | 4322 |
| REACTOME_EPHA_MEDIATED_G<br>ROWTH_CONE_COLLAPSE                            | 23    | 0.448 | 1.342 | 0.113 | 0.332 | 1.000 | 1596 |
| REACTOME_GLUCURONIDATION<br>REACTOME_SIGNALING_BY_VEG<br>F                 | 4     | 0.734 | 1.340 | 0.147 | 0.334 | 1.000 | 1516 |
| 86                                                                         | 0.340 | 1.339 | 0.058 | 0.334 | 1.000 | 3953  |      |
| REACTOME_SURFACTANT_META<br>BOLISM                                         | 11    | 0.553 | 1.338 | 0.119 | 0.335 | 1.000 | 2740 |
| REACTOME_CHYLOMICRON_CLE<br>ARANCE                                         | 4     | 0.724 | 1.336 | 0.138 | 0.338 | 1.000 | 692  |
| REACTOME_ONCOGENE_INDUC<br>ED_SENESCENCE                                   | 33    | 0.416 | 1.330 | 0.115 | 0.348 | 1.000 | 1769 |
| REACTOME_RAS_SIGNALING_DO<br>WNSTREAM_OF_NF1_LOSS_OF_<br>FUNCTION_VARIANTS | 7     | 0.636 | 1.330 | 0.139 | 0.348 | 1.000 | 3989 |
| REACTOME_PD_1_SIGNALING                                                    | 6     | 0.637 | 1.328 | 0.161 | 0.352 | 1.000 | 1036 |
| REACTOME_PROLACTIN_RECEPT<br>OR_SIGNALING                                  | 10    | 0.562 | 1.327 | 0.142 | 0.352 | 1.000 | 3480 |
| REACTOME_GLYCOGEN_SYNTHE<br>SIS                                            | 13    | 0.526 | 1.325 | 0.124 | 0.355 | 1.000 | 1569 |
| REACTOME_FCERI_MEDIATED_<br>MAPK_ACTIVATION                                | 25    | 0.431 | 1.324 | 0.112 | 0.355 | 1.000 | 3355 |
| REACTOME_SIGNALING_BY_EGF<br>R                                             | 42    | 0.389 | 1.320 | 0.099 | 0.364 | 1.000 | 1986 |
| REACTOME_MHC_CLASS_II_ANT<br>IGEN_PRESENTATION                             | 95    | 0.337 | 1.319 | 0.065 | 0.364 | 1.000 | 2543 |
| REACTOME_TP53_REGULATES_T<br>RANSCRIPTION_OF_CELL_DEATH<br>_GENES          | 37    | 0.398 | 1.318 | 0.094 | 0.365 | 1.000 | 2446 |
| REACTOME_RUNX3_REGULATES<br>_CDKN1A_TRANSCRIPTION                          | 7     | 0.633 | 1.316 | 0.159 | 0.368 | 1.000 | 2991 |
| REACTOME_INTRINSIC_PATHWA<br>Y_OF_FIBRIN_CLOT_FORMATIO<br>N                | 10    | 0.552 | 1.313 | 0.162 | 0.372 | 1.000 | 333  |
| REACTOME_CS_DS_DEGRADATI<br>ON                                             | 9     | 0.574 | 1.313 | 0.138 | 0.371 | 1.000 | 461  |
| REACTOME_ERYTHROCYTES_TAK<br>E_UP_CARBON_DIOXIDE_AND_R<br>LEASE_OXYGEN     | 6     | 0.632 | 1.313 | 0.161 | 0.371 | 1.000 | 1529 |
| REACTOME_APOBEC3G_MEDIAT<br>ED_RESISTANCE_TO_HIV_1_INFE<br>CTION           | 5     | 0.669 | 1.312 | 0.177 | 0.373 | 1.000 | 4215 |

|                                                                                    |     |       |       |       |       |       |      |
|------------------------------------------------------------------------------------|-----|-------|-------|-------|-------|-------|------|
| REACTOME_CD163_MEDIATING<br>_AN_ANTI_INFLAMMATORY_RES<br>PONSE                     | 7   | 0.609 | 1.311 | 0.161 | 0.372 | 1.000 | 3309 |
| REACTOME_TRANSLATION                                                               | 284 | 0.289 | 1.310 | 0.029 | 0.373 | 1.000 | 4231 |
| REACTOME_FERTILIZATION                                                             | 6   | 0.643 | 1.310 | 0.152 | 0.373 | 1.000 | 830  |
| REACTOME_RET_SIGNALING                                                             | 29  | 0.418 | 1.309 | 0.131 | 0.373 | 1.000 | 1544 |
| REACTOME_SIGNALING_BY_NUC<br>LEAR_RECEPTORS                                        | 195 | 0.300 | 1.307 | 0.039 | 0.377 | 1.000 | 2357 |
| REACTOME_BMAL1_CLOCK_NPA<br>S2_ACTIVATES_CIRCADIAN_GEN<br>E_EXPRESSION             | 26  | 0.434 | 1.307 | 0.125 | 0.376 | 1.000 | 1886 |
| REACTOME_SIGNALING_BY_PTK<br>6                                                     | 42  | 0.388 | 1.304 | 0.114 | 0.381 | 1.000 | 4357 |
| REACTOME_MAPK3_ERK1_ACTI<br>VATION                                                 | 9   | 0.560 | 1.303 | 0.175 | 0.381 | 1.000 | 3707 |
| REACTOME_PLATELET_HOMEOS<br>TASIS                                                  | 45  | 0.377 | 1.303 | 0.118 | 0.381 | 1.000 | 2441 |
| REACTOME_SYNTHESIS_OF_PE<br>REACTOME_TOXICITY_OF_BOTU<br>LINUM_TOXIN_TYPE_D_BONT_D | 10  | 0.543 | 1.303 | 0.144 | 0.380 | 1.000 | 1456 |
| —                                                                                  | 3   | 0.776 | 1.302 | 0.124 | 0.379 | 1.000 | 2848 |
| REACTOME_AUTOPHAGY                                                                 | 134 | 0.310 | 1.301 | 0.063 | 0.381 | 1.000 | 2768 |
| REACTOME_SUPPRESSION_OF_P<br>HAGOSOMAL_MATURATION                                  | 12  | 0.523 | 1.301 | 0.161 | 0.381 | 1.000 | 2576 |
| REACTOME_NETRIN_MEDIATED<br>_REPULSION_SIGNALS                                     | 4   | 0.721 | 1.300 | 0.155 | 0.382 | 1.000 | 400  |
| REACTOME_EGFR_TRANSACTIVA<br>TION_BY_GASTRIN                                       | 7   | 0.604 | 1.298 | 0.173 | 0.385 | 1.000 | 176  |
| REACTOME_KINESINS                                                                  | 50  | 0.368 | 1.297 | 0.085 | 0.385 | 1.000 | 1710 |
| REACTOME_SHC1_EVENTS_IN_E<br>RBB2_SIGNALING                                        | 15  | 0.492 | 1.296 | 0.181 | 0.385 | 1.000 | 1398 |
| REACTOME_SHC1_EVENTS_IN_E<br>RBB4_SIGNALING                                        | 9   | 0.577 | 1.295 | 0.178 | 0.387 | 1.000 | 816  |
| REACTOME_THYROXINE_BIOSYN<br>THESIS                                                | 1   | 0.963 | 1.294 | 0.065 | 0.388 | 1.000 | 464  |
| REACTOME_PREVENTION_OF_P<br>HAGOSOMAL_LYSOSOMAL_FUSI<br>ON                         | 9   | 0.562 | 1.294 | 0.181 | 0.387 | 1.000 | 1977 |
| REACTOME_SIGNALING_BY_MA<br>PK_MUTANTS                                             | 7   | 0.601 | 1.294 | 0.178 | 0.386 | 1.000 | 4650 |
| REACTOME_EPHB_MEDIATED_F<br>ORWARD_SIGNALING                                       | 39  | 0.382 | 1.292 | 0.125 | 0.389 | 1.000 | 3390 |
| REACTOME_CROSSLINKING_OF_<br>COLLAGEN_FIBRILS                                      | 9   | 0.551 | 1.291 | 0.150 | 0.391 | 1.000 | 1231 |
| REACTOME_REGULATED_PROTE<br>OLYSIS_OF_P75NTR                                       | 11  | 0.522 | 1.289 | 0.186 | 0.393 | 1.000 | 6    |
| REACTOME_ADRENOCEPTORS                                                             | 2   | 0.850 | 1.288 | 0.142 | 0.394 | 1.000 | 320  |
| REACTOME_INTEGRATION_OF_P<br>ROVIRUS                                               | 9   | 0.555 | 1.287 | 0.200 | 0.397 | 1.000 | 4837 |
| REACTOME_NRIF_SIGNALS_CELL<br>_DEATH_FROM_THE_NUCLEUS                              | 15  | 0.492 | 1.286 | 0.177 | 0.396 | 1.000 | 1569 |

|                                                                                    |     |       |       |       |       |       |      |
|------------------------------------------------------------------------------------|-----|-------|-------|-------|-------|-------|------|
| REACTOME_INTERLEUKIN_23_SIGNALING                                                  | 5   | 0.665 | 1.286 | 0.182 | 0.396 | 1.000 | 40   |
| REACTOME_DOWNREGULATION_OF_SMAD2_3_SMAD4_TRANSCRIPTIONAL_ACTIVITY                  | 23  | 0.431 | 1.286 | 0.142 | 0.395 | 1.000 | 3779 |
| REACTOME_DARPP_32_EVENTS                                                           | 19  | 0.450 | 1.283 | 0.152 | 0.399 | 1.000 | 2088 |
| REACTOME_CARBOXYTERMINAL_POST_TRANSLATIONAL_MODIFICATIONS_OF_TUBULIN               | 26  | 0.419 | 1.281 | 0.136 | 0.403 | 1.000 | 1710 |
| REACTOME_SERINE_BIOSYNTHESIS                                                       | 9   | 0.560 | 1.280 | 0.181 | 0.403 | 1.000 | 1648 |
| REACTOME_ASPARAGINE_N_LINKED_GLYCOSYLATION                                         | 262 | 0.284 | 1.280 | 0.036 | 0.403 | 1.000 | 2647 |
| REACTOME_CLASS_B_2_SECRETIN_FAMILY_RECEPTORS                                       | 38  | 0.379 | 1.280 | 0.144 | 0.402 | 1.000 | 2180 |
| REACTOME_INTERLEUKIN_2_FAMILY_SIGNALING                                            | 26  | 0.412 | 1.280 | 0.165 | 0.401 | 1.000 | 3707 |
| REACTOME_SEMA4D_IN_SEMAPHORIN_SIGNALING                                            | 23  | 0.437 | 1.278 | 0.147 | 0.404 | 1.000 | 3949 |
| REACTOME_RUNX1_AND_FOXP3_CONTROL_THE_DEVELOPMENT_OF_REGULATORY_T_LYMPHOCYTES_TREGS | 5   | 0.665 | 1.278 | 0.178 | 0.403 | 1.000 | 2832 |
| REACTOME_SEMA4D_MEDIATED_INHIBITION_OF_CELL_ATTACHMENT_AND_MIGRATION               | 8   | 0.564 | 1.275 | 0.182 | 0.407 | 1.000 | 3390 |
| REACTOME_PHASE_3_RAPID_REPOLARISATION                                              | 4   | 0.701 | 1.274 | 0.205 | 0.408 | 1.000 | 513  |
| REACTOME_FC_EPSILON_RECEPTOR_FCERI_SIGNALING                                       | 117 | 0.311 | 1.272 | 0.076 | 0.413 | 1.000 | 3985 |
| REACTOME_SIGNALING_BY_FGF_R3                                                       | 30  | 0.402 | 1.271 | 0.137 | 0.413 | 1.000 | 2088 |
| REACTOME_SHC_MEDIATED_CASCADE_FGFR1                                                | 9   | 0.550 | 1.269 | 0.175 | 0.416 | 1.000 | 4782 |
| REACTOME_RHO_GTPASES_ACTIVATE_NADPH_OXIDASES                                       | 14  | 0.488 | 1.269 | 0.170 | 0.416 | 1.000 | 3243 |
| REACTOME_EPH_EPHRIN_SIGNALING                                                      | 79  | 0.330 | 1.267 | 0.096 | 0.418 | 1.000 | 1751 |
| REACTOME_VEGF_LIGAND_RECEPTOR_INTERACTIONS                                         | 3   | 0.752 | 1.266 | 0.209 | 0.419 | 1.000 | 1649 |
| REACTOME_MET_ACTIVATES_RAP1_AND_RAC1                                               | 9   | 0.550 | 1.266 | 0.189 | 0.419 | 1.000 | 4574 |
| REACTOME_ALPHA_PROTEIN_KINASE_1_SIGNALING_PATHWAY                                  | 11  | 0.516 | 1.264 | 0.221 | 0.422 | 1.000 | 1569 |
| REACTOME_SIGNALING_BY_FGF_R                                                        | 65  | 0.344 | 1.264 | 0.115 | 0.421 | 1.000 | 2125 |
| REACTOME_CALCINEURIN_ACTIVATES_NFAT                                                | 9   | 0.558 | 1.263 | 0.205 | 0.421 | 1.000 | 4551 |
| REACTOME_SIGNALING_BY_MODERATE_KINASE_ACTIVITY_BRAF_MUTANTS                        | 38  | 0.380 | 1.262 | 0.154 | 0.423 | 1.000 | 1751 |

|                                                                                                               |     |       |       |       |       |       |      |
|---------------------------------------------------------------------------------------------------------------|-----|-------|-------|-------|-------|-------|------|
| REACTOME_UNBLOCKING_OF_NMDA_RECEPTORS_Glutamate_BINDING_AND_ACTIVATION                                        | 10  | 0.526 | 1.260 | 0.194 | 0.426 | 1.000 | 3066 |
| REACTOME_RUNX1_REGULATES_TRANSCRIPTION_OF_GENES_INVOLVED_IN_DIFFERENTIATION_OF_KERATINOCYTES                  | 7   | 0.584 | 1.260 | 0.198 | 0.425 | 1.000 | 1908 |
| REACTOME_RUNX1_REGULATES_GENES_INVOLVED_IN_MEGAKARYOCYTE_DIFFERENTIATION_AND_PLATELET_FUNCTION                | 44  | 0.360 | 1.257 | 0.141 | 0.429 | 1.000 | 2672 |
| REACTOME_PHOSPHORYLATION_SITE_MUTANTS_OF_CTNNB1_ARE_NOT_TARGETED_TO_THE_PROTEASOME_BY_THE_DESTRUCTIVE_COMPLEX | 15  | 0.466 | 1.257 | 0.191 | 0.430 | 1.000 | 3597 |
| REACTOME_INTERLEUKIN_21_SIGNALING                                                                             | 6   | 0.618 | 1.256 | 0.203 | 0.430 | 1.000 | 3707 |
| REACTOME_PHASE_0_RAPID_DEPOLARISATION                                                                         | 16  | 0.463 | 1.254 | 0.183 | 0.433 | 1.000 | 2854 |
| REACTOME_SIGNALING_BY_MST1                                                                                    | 5   | 0.634 | 1.254 | 0.203 | 0.433 | 1.000 | 2790 |
| REACTOME_PURINE_SALVAGE                                                                                       | 12  | 0.502 | 1.254 | 0.207 | 0.432 | 1.000 | 1328 |
| REACTOME_ONCOGENIC_MAPK_SIGNALING                                                                             | 74  | 0.332 | 1.253 | 0.117 | 0.431 | 1.000 | 4416 |
| REACTOME_FOXO_MEDIATED_TRANSCRIPTION                                                                          | 55  | 0.344 | 1.253 | 0.115 | 0.431 | 1.000 | 3691 |
| REACTOME_ION_HOMEOSTASIS                                                                                      | 32  | 0.388 | 1.252 | 0.164 | 0.432 | 1.000 | 1278 |
| REACTOME_ACROSOME_REACTION_AND_SPERM_OOCYTE_Membrane_BINDING                                                  | 1   | 0.935 | 1.251 | 0.128 | 0.433 | 1.000 | 830  |
| REACTOME_G_ALPHA_I_SIGNALING_EVENTS                                                                           | 145 | 0.296 | 1.247 | 0.093 | 0.441 | 1.000 | 2186 |
| REACTOME_METABOLISM_OF_STEROID_HORMONES                                                                       | 17  | 0.456 | 1.246 | 0.197 | 0.442 | 1.000 | 4118 |
| REACTOME_METABOLISM_OF_CARBONHYDRATES                                                                         | 221 | 0.279 | 1.246 | 0.065 | 0.441 | 1.000 | 2581 |
| REACTOME_COMPETING_ENDOGENOUS_RNAS_CERNAS_REGULATE_PTEN_TRANSLATION                                           | 8   | 0.546 | 1.244 | 0.228 | 0.443 | 1.000 | 431  |
| REACTOME_RUNX2_REGULATES_CHONDROCYTE_MATURATION                                                               | 3   | 0.736 | 1.243 | 0.224 | 0.445 | 1.000 | 1908 |
| REACTOME_HORMONE_LIGAND_BINDING_RECEPTORS                                                                     | 1   | 0.939 | 1.243 | 0.121 | 0.445 | 1.000 | 770  |
| REACTOME_FCERI_MEDIATED_CAMP_2_MOBILIZATION                                                                   | 23  | 0.414 | 1.238 | 0.188 | 0.454 | 1.000 | 1713 |
| REACTOME_DOWNREGULATION_OF_ERBB2_SIGNALING                                                                    | 21  | 0.421 | 1.236 | 0.192 | 0.457 | 1.000 | 2078 |
| REACTOME_SIGNALING_BY_FGF_R2                                                                                  | 57  | 0.342 | 1.236 | 0.143 | 0.457 | 1.000 | 2357 |
| REACTOME_EARLY_PHASE_OF_HIV_LIFE_CYCLE                                                                        | 13  | 0.492 | 1.234 | 0.214 | 0.459 | 1.000 | 1800 |

|                                                                                |     |       |       |       |       |       |      |
|--------------------------------------------------------------------------------|-----|-------|-------|-------|-------|-------|------|
| REACTOME_ENOS_ACTIVATION                                                       | 10  | 0.521 | 1.233 | 0.215 | 0.460 | 1.000 | 2078 |
| REACTOME_REGULATION_OF_S<br>IGNALING_BY_CBL                                    | 20  | 0.422 | 1.233 | 0.191 | 0.459 | 1.000 | 1569 |
| REACTOME_INLA_MEDIATED_EN<br>TRY_OF_LISTERIA_MONOCYTOG<br>ENES_INTO_HOST_CELLS | 9   | 0.538 | 1.229 | 0.238 | 0.468 | 1.000 | 3779 |
| REACTOME_NR1H2_AND_NR1H<br>3_MEDIATED_SIGNALING                                | 37  | 0.373 | 1.228 | 0.173 | 0.468 | 1.000 | 602  |
| REACTOME_DISEASES_OF_CARB<br>OHYDRATE_METABOLISM                               | 27  | 0.393 | 1.226 | 0.182 | 0.471 | 1.000 | 1984 |
| REACTOME_TBC_RABGAPS                                                           | 39  | 0.358 | 1.226 | 0.151 | 0.470 | 1.000 | 2519 |
| REACTOME_CHAPERONE_MEDIA<br>TED_AUTOPHAGY                                      | 17  | 0.443 | 1.224 | 0.196 | 0.474 | 1.000 | 2078 |
| REACTOME_RAP1_SIGNALLING                                                       | 13  | 0.474 | 1.223 | 0.217 | 0.475 | 1.000 | 3393 |
| REACTOME_RUNX2_REGULATES<br>_BONE_DEVELOPMENT                                  | 23  | 0.407 | 1.223 | 0.223 | 0.474 | 1.000 | 1908 |
| REACTOME_LONG_TERM_POTE<br>NTIATION                                            | 11  | 0.489 | 1.221 | 0.225 | 0.477 | 1.000 | 2486 |
| REACTOME_THE_CITRIC_ACID_T<br>CA_CYCLE_AND_RESPIRATORY_E<br>LECTRON_TRANSPORT  | 155 | 0.287 | 1.221 | 0.099 | 0.477 | 1.000 | 4134 |
| REACTOME_SIGNALING_BY_RHO<br>_GTPASES                                          | 348 | 0.263 | 1.220 | 0.050 | 0.477 | 1.000 | 2523 |
| REACTOME_SIGNALLING_TO_RA<br>S                                                 | 17  | 0.452 | 1.219 | 0.228 | 0.478 | 1.000 | 4574 |
| REACTOME_METABOLISM_OF_N<br>ITRIC_OXIDE_NOS3_ACTIVATION<br>_AND_REGULATION     | 13  | 0.482 | 1.218 | 0.229 | 0.481 | 1.000 | 2078 |
| REACTOME_TYROSINE_CATABOL<br>ISM                                               | 3   | 0.749 | 1.217 | 0.226 | 0.480 | 1.000 | 3191 |
| REACTOME_EICOSANOIDS                                                           | 1   | 0.914 | 1.216 | 0.173 | 0.482 | 1.000 | 1097 |
| REACTOME_GLYCOGEN_METAB<br>OLISM                                               | 24  | 0.411 | 1.216 | 0.184 | 0.481 | 1.000 | 1569 |
| REACTOME_LEISHMANIA_INFEC<br>TION                                              | 122 | 0.295 | 1.214 | 0.122 | 0.484 | 1.000 | 2269 |
| REACTOME_FCGAMMA_RECEPT<br>OR_FCGR_DEPENDENT_PHAGOC<br>YTOSIS                  | 71  | 0.321 | 1.211 | 0.156 | 0.490 | 1.000 | 3912 |
| REACTOME_ERKS_ARE_INACTIV<br>ATED                                              | 13  | 0.465 | 1.210 | 0.237 | 0.490 | 1.000 | 2574 |
| REACTOME_NEUROTOXICITY_OF<br>_CLOSTRIDIUM_TOXINS                               | 6   | 0.597 | 1.209 | 0.276 | 0.491 | 1.000 | 2848 |
| REACTOME_TRAFFICKING_OF_A<br>MPA_RECEPTORS                                     | 18  | 0.441 | 1.209 | 0.218 | 0.492 | 1.000 | 3318 |
| REACTOME_SENESCENCE ASSO<br>CIATED_SECRETORY_PHENOTYP<br>E_SASP_               | 57  | 0.340 | 1.209 | 0.175 | 0.491 | 1.000 | 3185 |
| REACTOME_RNA_POLYMERASE_<br>III_CHAIN_ELONGATION                               | 18  | 0.429 | 1.208 | 0.224 | 0.491 | 1.000 | 803  |
| REACTOME_RHO_GTPASES_ACTI<br>VATE_RHOTEKIN_AND_RHOPHIL<br>INS                  | 8   | 0.527 | 1.208 | 0.240 | 0.490 | 1.000 | 3484 |

|                                                                                             |     |       |       |       |       |       |      |
|---------------------------------------------------------------------------------------------|-----|-------|-------|-------|-------|-------|------|
| REACTOME_BIOSYNTHESIS_OF_MARESIN LIKE SPMS                                                  | 1   | 0.906 | 1.206 | 0.216 | 0.494 | 1.000 | 1194 |
| REACTOME_INSERTION_OF_TAIL_ANCHORED_PROTEINS_INTO_THE_ENDOPLASMIC_RETICULUM_MEMBRANE        | 21  | 0.413 | 1.205 | 0.208 | 0.494 | 1.000 | 2319 |
| REACTOME_PI_3K_CASCADE_FGFR2                                                                | 8   | 0.526 | 1.200 | 0.247 | 0.504 | 1.000 | 1020 |
| REACTOME_INTRAFLAGELLAR_TRANSPORT                                                           | 48  | 0.341 | 1.200 | 0.202 | 0.503 | 1.000 | 1710 |
| REACTOME_MET_PROMOTES_CELL_MOTILITY                                                         | 30  | 0.377 | 1.200 | 0.227 | 0.502 | 1.000 | 3654 |
| REACTOME_TRANSPORT_OF_SMALL_MOLECULES                                                       | 455 | 0.250 | 1.198 | 0.069 | 0.505 | 1.000 | 2807 |
| REACTOME_TRANSPORT_OF_NUCLEOTIDE_SUGARS                                                     | 9   | 0.509 | 1.198 | 0.239 | 0.504 | 1.000 | 3600 |
| REACTOME_AMINO_ACIDS_REGULATE_MTORC1                                                        | 50  | 0.339 | 1.198 | 0.196 | 0.504 | 1.000 | 2587 |
| REACTOME_ANTIGEN_PROCESSING_CROSS_PRESENTATION                                              | 82  | 0.313 | 1.197 | 0.176 | 0.505 | 1.000 | 4312 |
| REACTOME_DECTIN_2_FAMILY                                                                    | 7   | 0.567 | 1.194 | 0.265 | 0.510 | 1.000 | 1022 |
| REACTOME_COMPLEX_I_BIOGENESIS                                                               | 49  | 0.339 | 1.193 | 0.206 | 0.511 | 1.000 | 4134 |
| REACTOME_NETRIN_1_SIGNALING                                                                 | 36  | 0.363 | 1.193 | 0.205 | 0.510 | 1.000 | 1773 |
| REACTOME_OXIDATIVE_STRESS_INDUCED_SENESCENCE                                                | 72  | 0.316 | 1.190 | 0.170 | 0.515 | 1.000 | 1815 |
| REACTOME_IRAK2_MEDIATED_ACTIVATION_OF_TAK1_COMPLEX                                          | 10  | 0.503 | 1.190 | 0.254 | 0.515 | 1.000 | 1569 |
| REACTOME_REGULATION_OF_CYTOSKELETAL_REMODELING_AND_CELL_SPREADING_BY_IPP_COMPLEX_COMPONENTS | 7   | 0.549 | 1.188 | 0.269 | 0.519 | 1.000 | 4170 |
| REACTOME_INTRA_GOLGI_AND_RETROGRADE_GOLGI_TO_ER_TRAFFIC                                     | 183 | 0.272 | 1.184 | 0.125 | 0.527 | 1.000 | 3376 |
| REACTOME_NEF_AND_SIGNAL_TRANSDUCTION                                                        | 4   | 0.648 | 1.183 | 0.282 | 0.527 | 1.000 | 3874 |
| REACTOME_NUCLEAR_SIGNALING_BY_ERBB4                                                         | 20  | 0.419 | 1.183 | 0.236 | 0.526 | 1.000 | 3271 |
| REACTOME_ASSEMBLY_OF_ACTIVE_LPL_AND_LIPC_LIPASE_COMPLEXES                                   | 11  | 0.492 | 1.182 | 0.271 | 0.528 | 1.000 | 1700 |
| REACTOME_CREATINE_METABOLISM                                                                | 5   | 0.608 | 1.179 | 0.292 | 0.533 | 1.000 | 774  |
| REACTOME_ERBB2_ACTIVATES_PTK6_SIGNALING                                                     | 6   | 0.578 | 1.178 | 0.294 | 0.533 | 1.000 | 606  |
| REACTOME_LYSOPHINGOLIPID_AND_LPA_RECEPTORS                                                  | 6   | 0.574 | 1.178 | 0.269 | 0.533 | 1.000 | 1058 |
| REACTOME_REGULATION_OF_P53_MRNA_TRANSLATION                                                 | 9   | 0.516 | 1.178 | 0.293 | 0.532 | 1.000 | 431  |
| REACTOME_DSCAM_INTERACTIONS                                                                 | 7   | 0.548 | 1.178 | 0.266 | 0.531 | 1.000 | 4122 |

|                                                                                                         |    |       |       |       |       |       |      |
|---------------------------------------------------------------------------------------------------------|----|-------|-------|-------|-------|-------|------|
| REACTOME_NUCLEAR_ENVELOP<br>E_NE_REASSEMBLY                                                             | 68 | 0.312 | 1.175 | 0.177 | 0.537 | 1.000 | 3569 |
| REACTOME_GENE_AND_PROTEI<br>N_EXPRESSION_BY_JAK_STAT_SI<br>GNALING_AFTER_INTERLEUKIN_<br>12_STIMULATION | 31 | 0.368 | 1.174 | 0.255 | 0.538 | 1.000 | 4097 |
| REACTOME_CHK1_CHK2_CDS1_<br>MEDIATED_INACTIVATION_OF_C<br>YCLIN_B_CDK1_COMPLEX                          | 13 | 0.457 | 1.173 | 0.261 | 0.538 | 1.000 | 3550 |
| REACTOME_RUNX3_REGULATES<br>_YAP1_MEDIATED_TRANSCRIPTI<br>ON                                            | 8  | 0.517 | 1.173 | 0.275 | 0.539 | 1.000 | 1386 |
| REACTOME_MET_ACTIVATES_RA<br>S_SIGNALING                                                                | 9  | 0.508 | 1.171 | 0.281 | 0.541 | 1.000 | 4574 |
| REACTOME_PERK_REGULATES_<br>GENE_EXPRESSION                                                             | 31 | 0.364 | 1.169 | 0.254 | 0.545 | 1.000 | 2229 |
| REACTOME_SUMO_IS_PROTEOL<br>YTICALLY_PROCESSED                                                          | 6  | 0.561 | 1.168 | 0.306 | 0.546 | 1.000 | 4031 |
| REACTOME_P75NTR_RECRUITS_<br>SIGNALLING_COMPLEXES                                                       | 12 | 0.454 | 1.168 | 0.258 | 0.545 | 1.000 | 1569 |
| REACTOME_ACTIVATION_OF_M<br>ATRIX_METALLOPROTEINASES                                                    | 14 | 0.451 | 1.168 | 0.268 | 0.544 | 1.000 | 1119 |
| REACTOME_NF_KB_IS_ACTIVATE<br>D_AND_SIGNALS_SURVIVAL                                                    | 12 | 0.467 | 1.167 | 0.285 | 0.546 | 1.000 | 1569 |
| REACTOME_PROTEIN_FOLDING                                                                                | 75 | 0.309 | 1.166 | 0.198 | 0.547 | 1.000 | 2421 |
| REACTOME_SIGNALING_BY_WN<br>T_IN_CANCER                                                                 | 30 | 0.371 | 1.163 | 0.243 | 0.553 | 1.000 | 3626 |
| REACTOME_ATTACHMENT_OF_<br>GPI_ANCHOR_TO_UPAR                                                           | 7  | 0.547 | 1.162 | 0.287 | 0.553 | 1.000 | 837  |
| REACTOME_FGFR2_LIGAND_BIN<br>DING_AND_ACTIVATION                                                        | 5  | 0.598 | 1.161 | 0.306 | 0.554 | 1.000 | 1506 |
| REACTOME_ACTIVATED_NTRK3_<br>SIGNALS_THROUGH_RAS                                                        | 7  | 0.543 | 1.160 | 0.268 | 0.555 | 1.000 | 4574 |
| REACTOME_ARYL_HYDROCARBO<br>N_RECEPTOR_SIGNALLING                                                       | 6  | 0.556 | 1.159 | 0.291 | 0.556 | 1.000 | 1690 |
| REACTOME_ESTROGEN_STIMUL<br>ATED_SIGNALING_THROUGH_PR<br>KCZ                                            | 6  | 0.569 | 1.159 | 0.300 | 0.556 | 1.000 | 4234 |
| REACTOME_TRANSPORT_OF_VIT<br>AMINS_NUCLEOSIDES_AND_REL<br>ATED_MOLECULES                                | 28 | 0.378 | 1.159 | 0.249 | 0.555 | 1.000 | 1623 |
| REACTOME_CARGO_RECOGNITI<br>ON_FOR_CLATHRIN_MEDIATED_<br>ENDOCYTOSIS                                    | 78 | 0.303 | 1.159 | 0.194 | 0.554 | 1.000 | 3583 |
| REACTOME_SIGNALING_BY_NTR<br>K3_TRKC_                                                                   | 15 | 0.437 | 1.158 | 0.280 | 0.554 | 1.000 | 1901 |
| REACTOME_SIGNALING_BY_TGF<br>_BETA_RECEPTOR_COMPLEX                                                     | 72 | 0.309 | 1.157 | 0.211 | 0.555 | 1.000 | 3642 |
| REACTOME_SUPPRESSION_OF_A<br>POPTOSIS                                                                   | 6  | 0.569 | 1.156 | 0.310 | 0.558 | 1.000 | 4771 |
| REACTOME_THROMBIN_SIGNAL<br>LING_THROUGH_PROTEINASE_A<br>CTIVATED_RECEPTORS_PARS_                       | 19 | 0.415 | 1.152 | 0.277 | 0.566 | 1.000 | 272  |

|                                                                          |    |       |       |       |       |       |      |
|--------------------------------------------------------------------------|----|-------|-------|-------|-------|-------|------|
| REACTOME_GLUCOCORTICOID_BIOSYNTHESIS                                     | 2  | 0.756 | 1.148 | 0.319 | 0.574 | 1.000 | 2234 |
| REACTOME_MUCOPOLYSACCHARIDOSES                                           | 11 | 0.463 | 1.147 | 0.294 | 0.575 | 1.000 | 1984 |
| REACTOME_DOWNREGULATION_OF_ERBB2_ERBB3_SIGNALING                         | 11 | 0.463 | 1.147 | 0.291 | 0.574 | 1.000 | 3779 |
| REACTOME_RHO_GTPASES_ACTIVATION_KTN1                                     | 11 | 0.469 | 1.146 | 0.284 | 0.575 | 1.000 | 3390 |
| REACTOME_INTERLEUKIN_12_SIGNALING                                        | 36 | 0.347 | 1.146 | 0.242 | 0.574 | 1.000 | 4097 |
| REACTOME_SEMA4D_INDUCED_CELL_MIGRATION_AND_GROWTH_CONE_COLLAPSE          | 19 | 0.400 | 1.141 | 0.293 | 0.585 | 1.000 | 3949 |
| REACTOME_PI3K_EVENTS_IN_ERBB4_SIGNALING                                  | 5  | 0.588 | 1.138 | 0.349 | 0.589 | 1.000 | 606  |
| REACTOME_PHOSPHOLIPASE_C_MEDIATED_CASCADE_FGFR4                          | 5  | 0.592 | 1.138 | 0.331 | 0.590 | 1.000 | 1020 |
| REACTOME_MODULATION_BY_MTB_OF_HOST_IMMUNE_SYSTEM                         | 6  | 0.563 | 1.136 | 0.338 | 0.593 | 1.000 | 5168 |
| REACTOME_2_LTR_CIRCLE_FORMATION                                          | 7  | 0.530 | 1.136 | 0.327 | 0.592 | 1.000 | 4837 |
| REACTOME_PI_3K_CASCADE_FGFR4                                             | 9  | 0.496 | 1.135 | 0.325 | 0.593 | 1.000 | 1020 |
| REACTOME_SIGNALING_BY_NOTCH2                                             | 28 | 0.368 | 1.134 | 0.290 | 0.592 | 1.000 | 1569 |
| REACTOME_PI3K_EVENTS_IN_ERBB2_SIGNALING                                  | 8  | 0.501 | 1.133 | 0.301 | 0.594 | 1.000 | 606  |
| REACTOME_GOLGI_CISTERNAE_PERICENTRIOLAR_STACK_REORGANIZATION             | 14 | 0.446 | 1.133 | 0.286 | 0.593 | 1.000 | 4246 |
| REACTOME_SIGNALING_BY_ERBB2                                              | 41 | 0.340 | 1.133 | 0.260 | 0.592 | 1.000 | 2100 |
| REACTOME_SMAD2_SMAD3_SMAD4_HETEROTRIMER_REGULATES_TRANSCRIPTION          | 31 | 0.355 | 1.133 | 0.272 | 0.592 | 1.000 | 1569 |
| REACTOME_TRANSPORT_OF_FATTY_ACIDS                                        | 2  | 0.759 | 1.129 | 0.330 | 0.598 | 1.000 | 257  |
| REACTOME_FGFR1B_LIGAND_BINDING_AND_ACTIVATION                            | 2  | 0.766 | 1.128 | 0.341 | 0.599 | 1.000 | 720  |
| REACTOME_FGFR2C_LIGAND_BINDING_AND_ACTIVATION                            | 2  | 0.757 | 1.127 | 0.326 | 0.601 | 1.000 | 1020 |
| REACTOME_BIOSYNTHESIS_OF_MARESINS                                        | 2  | 0.750 | 1.124 | 0.325 | 0.607 | 1.000 | 3178 |
| REACTOME_FGFR1_LIGAND_BINDING_AND_ACTIVATION                             | 3  | 0.669 | 1.124 | 0.371 | 0.606 | 1.000 | 720  |
| REACTOME_TFAP2_AP_2_FAMILY_REGULATES_TRANSCRIPTION_OF_CELL_CYCLE_FACTORS | 5  | 0.571 | 1.123 | 0.364 | 0.607 | 1.000 | 1059 |
| REACTOME_ACTIVATION_OF_RAC1                                              | 10 | 0.477 | 1.123 | 0.333 | 0.607 | 1.000 | 3874 |
| REACTOME_PHOSPHOLIPASE_C_MEDIATED_CASCADE_FGFR2                          | 4  | 0.625 | 1.121 | 0.352 | 0.609 | 1.000 | 1020 |

|                                                                              |    |       |       |       |       |       |      |
|------------------------------------------------------------------------------|----|-------|-------|-------|-------|-------|------|
| REACTOME_PROTEIN_REPAIR                                                      | 6  | 0.560 | 1.119 | 0.368 | 0.613 | 1.000 | 5417 |
| REACTOME_CIRCADIAN_CLOCK                                                     | 67 | 0.300 | 1.119 | 0.260 | 0.613 | 1.000 | 1886 |
| REACTOME_SIGNALING_BY_TYROSINE_1_INSULIN_LIKE_GROWTH_FACTOR_1_RECEPTOR_IGF1R | 31 | 0.348 | 1.118 | 0.300 | 0.614 | 1.000 | 1544 |
| REACTOME_INTERLEUKIN_9_SIGNALING                                             | 5  | 0.586 | 1.117 | 0.357 | 0.615 | 1.000 | 3707 |
| REACTOME_P2Y_RECEPTORS                                                       | 3  | 0.657 | 1.117 | 0.367 | 0.615 | 1.000 | 456  |
| REACTOME_ACTIVATION_OF_BH3_ONLY_PROTEINS                                     | 29 | 0.355 | 1.114 | 0.336 | 0.621 | 1.000 | 1715 |
| REACTOME_RUNX2_REGULATES_OSTEOBLAST_DIFFERENTIATION                          | 18 | 0.399 | 1.113 | 0.309 | 0.621 | 1.000 | 1908 |
| REACTOME_DOWNSTREAM_SIGNALING_EVENTS_OF_B_CELL_RECEPTOR_BCR                  | 76 | 0.295 | 1.113 | 0.275 | 0.620 | 1.000 | 4312 |
| REACTOME_STAT5_ACTIVATION                                                    | 6  | 0.546 | 1.111 | 0.357 | 0.623 | 1.000 | 2908 |
| REACTOME_BETA_OXIDATION_OF_HEXANOYL_COA_TO_BUTANOYL_COA                      | 5  | 0.570 | 1.110 | 0.373 | 0.625 | 1.000 | 4043 |
| REACTOME_ATF4_ACTIVATES_GENES_IN_RESPONSE_TO_ENDOPLASMIC_RETICULUM_STRESS    | 26 | 0.365 | 1.109 | 0.320 | 0.627 | 1.000 | 1951 |
| REACTOME_NOTCH1_INTRACELLULAR_DOMAIN_REGULATES_TRANSCRIPTION                 | 45 | 0.322 | 1.108 | 0.313 | 0.628 | 1.000 | 3349 |
| REACTOME_INTRINSIC_PATHWAY_FOR_APOPTOSIS                                     | 51 | 0.313 | 1.106 | 0.289 | 0.631 | 1.000 | 1851 |
| REACTOME_METABOLIC_DISORDERS_OF_BIOLOGICAL_OXIDATION_ENZYMES                 | 21 | 0.376 | 1.106 | 0.323 | 0.630 | 1.000 | 1516 |
| REACTOME_OTHER_INTERLEUKIN_SIGNALING                                         | 16 | 0.409 | 1.104 | 0.326 | 0.632 | 1.000 | 1545 |
| REACTOME_REDUCTION_OF_CYTOSOLIC_CA_LEVELS                                    | 7  | 0.511 | 1.103 | 0.357 | 0.634 | 1.000 | 852  |
| REACTOME_THE_PHOTOTRANSDUCTION_CASCADE                                       | 15 | 0.413 | 1.103 | 0.307 | 0.633 | 1.000 | 1611 |
| REACTOME_ESTROGEN_DEPENDENT_GENE_EXPRESSION                                  | 93 | 0.282 | 1.102 | 0.262 | 0.635 | 1.000 | 2911 |
| REACTOME_TERMINATION_OF_O_GLYCAN_BIOSYNTHESIS                                | 8  | 0.499 | 1.100 | 0.365 | 0.637 | 1.000 | 3303 |
| REACTOME_SIGNALING_BY_FGF_R_IN_DISEASE                                       | 48 | 0.312 | 1.100 | 0.318 | 0.637 | 1.000 | 4894 |
| REACTOME_SPHINGOLIPID_DENOVO_BIOSYNTHESIS                                    | 35 | 0.337 | 1.098 | 0.332 | 0.640 | 1.000 | 3892 |
| REACTOME_NEF_MEDIATED_CD4_DOWN_REGULATION                                    | 9  | 0.475 | 1.097 | 0.363 | 0.641 | 1.000 | 2954 |
| REACTOME_SIGNALING_BY_ACTIVIN                                                | 10 | 0.457 | 1.097 | 0.361 | 0.641 | 1.000 | 1604 |
| REACTOME_CA2_ACTIVATED_K_CHANNELS                                            | 3  | 0.641 | 1.096 | 0.414 | 0.643 | 1.000 | 2209 |

|                                                                                                     |     |       |       |       |       |       |      |
|-----------------------------------------------------------------------------------------------------|-----|-------|-------|-------|-------|-------|------|
| REACTOME_CALNEXIN_CALRETI<br>CULIN_CYCLE                                                            | 26  | 0.353 | 1.096 | 0.308 | 0.642 | 1.000 | 4705 |
| REACTOME_GRB2_EVENTS_IN_E<br>RBB2_SIGNALING                                                         | 9   | 0.477 | 1.095 | 0.341 | 0.642 | 1.000 | 606  |
| REACTOME_CELLULAR_SENESCE<br>NCE                                                                    | 134 | 0.260 | 1.095 | 0.269 | 0.641 | 1.000 | 1815 |
| REACTOME_ANDROGEN_BIOSYN<br>THESIS                                                                  | 4   | 0.606 | 1.095 | 0.404 | 0.640 | 1.000 | 3601 |
| REACTOME_MAP3K8_TPL2_DEP<br>ENDENT_MAPK1_3_ACTIVATION                                               | 16  | 0.403 | 1.092 | 0.336 | 0.647 | 1.000 | 2850 |
| REACTOME_SIGNALING_BY_ERY<br>THROPOIETIN                                                            | 21  | 0.380 | 1.088 | 0.345 | 0.653 | 1.000 | 3480 |
| REACTOME_VITAMINS                                                                                   | 3   | 0.639 | 1.088 | 0.402 | 0.653 | 1.000 | 1273 |
| REACTOME_IRAK1_RECRUITS_IK<br>K_COMPLEX                                                             | 14  | 0.426 | 1.088 | 0.384 | 0.651 | 1.000 | 1722 |
| REACTOME_ER_QUALITY_CONT<br>ROL_COMPARTMENT_ERQC_                                                   | 21  | 0.381 | 1.088 | 0.359 | 0.651 | 1.000 | 4133 |
| REACTOME_PREGNENOLONE_BI<br>OSYNTHESIS                                                              | 9   | 0.480 | 1.087 | 0.385 | 0.652 | 1.000 | 4118 |
| REACTOME_PEXOPHAGY                                                                                  | 11  | 0.450 | 1.086 | 0.378 | 0.652 | 1.000 | 1569 |
| REACTOME_INTERLEUKIN_27_SI<br>GNALING                                                               | 8   | 0.489 | 1.086 | 0.381 | 0.651 | 1.000 | 3877 |
| REACTOME_INHIBITION_OF_DN<br>A_RECOMBINATION_AT_TELOM<br>ERE                                        | 30  | 0.339 | 1.085 | 0.321 | 0.653 | 1.000 | 3185 |
| REACTOME_EPH_EPHRIN_MEDI<br>ATED_REPULSION_OF_CELLS                                                 | 42  | 0.322 | 1.085 | 0.347 | 0.652 | 1.000 | 1115 |
| REACTOME_TRANSLATION_OF_<br>REPLICASE_AND_ASSEMBLY_OF_<br>THE_REPLICATION_TRANSCRIPTI<br>ON_COMPLEX | 13  | 0.430 | 1.084 | 0.385 | 0.654 | 1.000 | 2473 |
| REACTOME_INTERLEUKIN_35_SI<br>GNALLING                                                              | 8   | 0.489 | 1.082 | 0.381 | 0.656 | 1.000 | 3877 |
| REACTOME_CASPASE_ACTIVATI<br>ON_VIA_DEPENDENCE_RECEPTO<br>RS_IN_THE_ABSENCE_OF_LIGAN<br>D           | 7   | 0.503 | 1.082 | 0.402 | 0.655 | 1.000 | 4049 |
| REACTOME_SIGNALING_BY_TGF<br>B_FAMILY_MEMBERS                                                       | 86  | 0.277 | 1.081 | 0.313 | 0.656 | 1.000 | 1858 |
| REACTOME_PHENYLALANINE_M<br>ETABOLISM                                                               | 4   | 0.595 | 1.081 | 0.423 | 0.655 | 1.000 | 1805 |
| REACTOME_P75NTR_SIGNALS_V<br>IA_NF_KB                                                               | 15  | 0.404 | 1.080 | 0.373 | 0.656 | 1.000 | 1569 |
| REACTOME_PHASE_II_CONJUGA<br>TION_OF_COMPOUNDS                                                      | 51  | 0.304 | 1.080 | 0.324 | 0.657 | 1.000 | 2923 |
| REACTOME_STIMULI_SENSING_<br>CHANNELS                                                               | 57  | 0.297 | 1.078 | 0.346 | 0.660 | 1.000 | 1721 |
| REACTOME_MET_INTERACTS_W<br>ITH_TNS_PROTEINS                                                        | 4   | 0.595 | 1.078 | 0.398 | 0.659 | 1.000 | 1771 |
| REACTOME_PI_3K_CASCADE_FG<br>FR3                                                                    | 8   | 0.487 | 1.075 | 0.375 | 0.664 | 1.000 | 1136 |

|                                                                                |     |       |       |       |       |       |      |
|--------------------------------------------------------------------------------|-----|-------|-------|-------|-------|-------|------|
| REACTOME_ACTIVATION_OF_RAS_IN_B_CELLS                                          | 3   | 0.633 | 1.075 | 0.425 | 0.664 | 1.000 | 3953 |
| REACTOME_DETOXIFICATION_OF_REACTIVE_OXYGEN_SPECIES                             | 27  | 0.346 | 1.074 | 0.336 | 0.663 | 1.000 | 4653 |
| REACTOME_RUNX3_REGULATES_P14_ARF                                               | 10  | 0.455 | 1.074 | 0.386 | 0.662 | 1.000 | 3322 |
| REACTOME_HOST_INTERACTIONS_OF_HIV_FACTORS                                      | 123 | 0.259 | 1.074 | 0.320 | 0.662 | 1.000 | 4312 |
| REACTOME_MITOCHONDRIAL_FATTY_ACID_BETA_OXIDATION_OF_SATURATED_FATTY_ACIDS      | 8   | 0.471 | 1.073 | 0.397 | 0.662 | 1.000 | 4043 |
| REACTOME_SIGNALING_BY_KIT_IN_DISEASE                                           | 19  | 0.382 | 1.073 | 0.385 | 0.662 | 1.000 | 3953 |
| REACTOME_SIGNALING_BY_NOTCH1_HD_DOMAIN_MUTANTS_IN_CANCER                       | 14  | 0.417 | 1.073 | 0.379 | 0.661 | 1.000 | 1569 |
| REACTOME_DEFENSINS                                                             | 3   | 0.646 | 1.072 | 0.426 | 0.662 | 1.000 | 1036 |
| REACTOME_PLATELET_CALCIIUM_HOMEOSTASIS                                         | 17  | 0.380 | 1.072 | 0.352 | 0.662 | 1.000 | 1975 |
| REACTOME_LISTERIA_MONOCYTOGENES_ENTRY_INTO_HOST_CELLS                          | 18  | 0.384 | 1.069 | 0.360 | 0.667 | 1.000 | 3779 |
| REACTOME_TRANSCRIPTIONAL_REGULATION_BY_THE_AP2_FAMILY_OF_TRANSCRIPTION_FACTORS | 28  | 0.348 | 1.069 | 0.367 | 0.666 | 1.000 | 2775 |
| REACTOME_INTRACELLULAR_SIGNALING_BY_SECOND_MESSENGERS                          | 247 | 0.238 | 1.067 | 0.288 | 0.669 | 1.000 | 1351 |
| REACTOME_METABOLISM_OF_AMINO_ACIDS_AND_DERIVATIVES                             | 292 | 0.236 | 1.066 | 0.286 | 0.670 | 1.000 | 4025 |
| REACTOME_VEGFR2_MEDIATED_VASCULAR_PERMEABILITY                                 | 23  | 0.358 | 1.066 | 0.371 | 0.669 | 1.000 | 3943 |
| REACTOME_ALPHA_DEFENSINS                                                       | 3   | 0.646 | 1.065 | 0.441 | 0.671 | 1.000 | 1036 |
| REACTOME_TRANSCRIPTIONAL_REGULATION_BY_RUNX1                                   | 162 | 0.249 | 1.064 | 0.320 | 0.671 | 1.000 | 3525 |
| REACTOME_THE_ROLE_OF_NEF_IN_HIV_1_REPLICATION_AND_DISEASE_PATHOGENESIS         | 22  | 0.369 | 1.063 | 0.389 | 0.674 | 1.000 | 2954 |
| REACTOME_INTERLEUKIN_RECEPTOR_SHC_SIGNALING                                    | 15  | 0.395 | 1.063 | 0.372 | 0.673 | 1.000 | 3707 |
| REACTOME_BUDDING_AND_MATURATION_OF_HIV_VIRION                                  | 28  | 0.342 | 1.062 | 0.366 | 0.672 | 1.000 | 4066 |
| REACTOME_MITOCHONDRIAL_FATTY_ACID_BETA_OXIDATION_OF_UNSATURATED_FATTY_ACIDS    | 5   | 0.541 | 1.062 | 0.410 | 0.671 | 1.000 | 5531 |
| REACTOME_LYSOSOME_VESICLE_BIOGENESIS                                           | 31  | 0.334 | 1.062 | 0.372 | 0.670 | 1.000 | 2475 |
| REACTOME_TRIF_MEDIATED_PROGRAMMED_CELL_DEATH                                   | 7   | 0.498 | 1.062 | 0.390 | 0.669 | 1.000 | 317  |
| REACTOME_NEGATIVE_REGULATION_OF_MET_ACTIVITY                                   | 18  | 0.371 | 1.059 | 0.353 | 0.676 | 1.000 | 4574 |

|                                                                                                                         |     |       |       |       |       |       |      |
|-------------------------------------------------------------------------------------------------------------------------|-----|-------|-------|-------|-------|-------|------|
| REACTOME_G_ALPHA_Q_SIGNA<br>LLING_EVENTS                                                                                | 87  | 0.273 | 1.058 | 0.348 | 0.676 | 1.000 | 1412 |
| REACTOME_PI5P_REGULATES_T<br>P53_ACETYLATION                                                                            | 9   | 0.458 | 1.057 | 0.413 | 0.677 | 1.000 | 4119 |
| REACTOME_TRP_CHANNELS                                                                                                   | 13  | 0.416 | 1.056 | 0.410 | 0.679 | 1.000 | 2000 |
| REACTOME_ERYTHROCYTES_TAK<br>E_UP_OXYGEN_AND_RELEASE_C<br>ARBON_DIOXIDE                                                 | 2   | 0.687 | 1.056 | 0.431 | 0.678 | 1.000 | 1529 |
| REACTOME_TRANSCRIPTIONAL_<br>REGULATION_BY_RUNX3                                                                        | 92  | 0.265 | 1.055 | 0.337 | 0.680 | 1.000 | 4024 |
| REACTOME_RHO_GTPASE_CYCL<br>E                                                                                           | 117 | 0.259 | 1.054 | 0.354 | 0.681 | 1.000 | 1663 |
| REACTOME_TRANSCRIPTIONAL_<br>ACTIVITY_OF_SMAD2_SMAD3_S<br>MAD4_HETEROTRIMER                                             | 43  | 0.303 | 1.053 | 0.369 | 0.681 | 1.000 | 1799 |
| REACTOME_PROSTACYCLIN_SIG<br>NALLING_THROUGH_PROSTACY<br>CLIN_RECEPTOR                                                  | 8   | 0.474 | 1.053 | 0.404 | 0.680 | 1.000 | 2180 |
| REACTOME_ACTIVATION_OF_KA<br>INATE_RECEPTORS_UPON_GLUT<br>AMATE_BINDING                                                 | 15  | 0.400 | 1.052 | 0.382 | 0.681 | 1.000 | 2486 |
| REACTOME_GLUCAGON_LIKE_P<br>EPTIDE_1_GLP1_REGULATES_INS<br>ULIN_SECRETION                                               | 22  | 0.361 | 1.052 | 0.369 | 0.681 | 1.000 | 2180 |
| REACTOME_ERBB2_REGULATES_<br>CELL_MOTILITY                                                                              | 8   | 0.479 | 1.051 | 0.430 | 0.681 | 1.000 | 606  |
| REACTOME_INSULIN_PROCESSIN<br>G                                                                                         | 22  | 0.353 | 1.050 | 0.404 | 0.682 | 1.000 | 3910 |
| REACTOME_ACYL_CHAIN_REMO<br>DELLING_OF_PG                                                                               | 6   | 0.508 | 1.050 | 0.432 | 0.682 | 1.000 | 231  |
| REACTOME_AMYLOID_FIBER_FO<br>RMATION                                                                                    | 42  | 0.312 | 1.049 | 0.376 | 0.682 | 1.000 | 2748 |
| REACTOME_ACTIVATED_NTRK2_<br>SIGNALS_THROUGH_CDK5                                                                       | 5   | 0.522 | 1.049 | 0.444 | 0.682 | 1.000 | 2378 |
| REACTOME_SIGNALING_BY_THE<br>_B_CELL_RECEPTOR_BCR_                                                                      | 97  | 0.262 | 1.046 | 0.354 | 0.687 | 1.000 | 4312 |
| REACTOME_CELL_CELL_JUNCTIO<br>N_ORGANIZATION                                                                            | 35  | 0.318 | 1.046 | 0.380 | 0.686 | 1.000 | 964  |
| REACTOME_NEF_MEDIATES_DO<br>WN_MODULATION_OF_CELL_SU<br>RFACE_RECEPTORS_BY_RECRUIT<br>ING_THEM_TO_CLATHRIN_ADAP<br>TERS | 19  | 0.373 | 1.045 | 0.392 | 0.687 | 1.000 | 2954 |
| REACTOME_DEFECTIVE_GALNT3<br>_CAUSES_FAMILIAL_HYPERPHOS<br>PHATEMIC_TUMORAL_CALCINO<br>SIS_HFTC_                        | 4   | 0.583 | 1.045 | 0.462 | 0.687 | 1.000 | 1022 |
| REACTOME_ABACAVIR_METABO<br>LISM                                                                                        | 4   | 0.573 | 1.045 | 0.454 | 0.686 | 1.000 | 3240 |
| REACTOME_INTERLEUKIN_20_F<br>AMILY_SIGNALING                                                                            | 16  | 0.376 | 1.045 | 0.385 | 0.685 | 1.000 | 414  |
| REACTOME_MTORC1_MEDIATE<br>D_SIGNALLING                                                                                 | 23  | 0.354 | 1.041 | 0.403 | 0.692 | 1.000 | 2367 |

|                                                                          |     |       |       |       |       |       |      |
|--------------------------------------------------------------------------|-----|-------|-------|-------|-------|-------|------|
| REACTOME_E3_UBIQUITIN_LIGASES_UBIQUITINATE_TARGET_PROTEINS               | 45  | 0.297 | 1.039 | 0.371 | 0.695 | 1.000 | 2672 |
| REACTOME_VASOPRESSIN_REGULATES_RENAL_WATER_HOMEOSTASIS_VIA_AQUAPORINS    | 21  | 0.358 | 1.039 | 0.400 | 0.694 | 1.000 | 2182 |
| REACTOME_ADORA2B_MEDIATED_ANTI_INFLAMMATORY_CYTOKINES_PRODUCTION         | 37  | 0.311 | 1.039 | 0.404 | 0.693 | 1.000 | 2269 |
| REACTOME_VXPX_CARGO_TARGETING_TO_CILIUM                                  | 17  | 0.378 | 1.038 | 0.411 | 0.695 | 1.000 | 3223 |
| REACTOME_PHASE_1_INACTIVATION_OF_FAST_NA_CHANNELS                        | 3   | 0.624 | 1.037 | 0.475 | 0.696 | 1.000 | 332  |
| REACTOME_O_LINKED_GLYCOSYLATION                                          | 61  | 0.281 | 1.034 | 0.378 | 0.703 | 1.000 | 1630 |
| REACTOME_DIGESTION_OF_DIETARY_LIPID                                      | 1   | 0.776 | 1.034 | 0.447 | 0.702 | 1.000 | 2844 |
| REACTOME_DISEASES_ASSOCIATED_WITH_SURFACTANT_METABOLISM                  | 1   | 0.784 | 1.032 | 0.454 | 0.705 | 1.000 | 2740 |
| REACTOME_MECP2_REGULATES_TRANSCRIPTION_FACTORS                           | 3   | 0.615 | 1.032 | 0.489 | 0.705 | 1.000 | 4899 |
| REACTOME_ROBO_RECEPTORS_BIND_AKAP5                                       | 7   | 0.480 | 1.030 | 0.438 | 0.707 | 1.000 | 1610 |
| REACTOME_REGULATION_OF_RUNX1_EXPRESSION_AND_ACTIVITY                     | 16  | 0.384 | 1.029 | 0.422 | 0.708 | 1.000 | 1908 |
| REACTOME_ROLE_OF_LAT2_NATAL_LAB_ON_CALCIIUM_MOBILIZATION                 | 13  | 0.411 | 1.029 | 0.433 | 0.708 | 1.000 | 816  |
| REACTOME_RHO_GTPASES_ACTIVATE_FORMINS                                    | 129 | 0.248 | 1.029 | 0.396 | 0.707 | 1.000 | 2493 |
| REACTOME_DOPAMINE_NEUROTRANSMITTER_RELEASE_CYCLE                         | 14  | 0.393 | 1.027 | 0.424 | 0.709 | 1.000 | 3096 |
| REACTOME_IRS_MEDIATED_SIGNALING                                          | 29  | 0.324 | 1.022 | 0.408 | 0.720 | 1.000 | 1544 |
| REACTOME_ARMS_MEDIATED_ACTIVATION                                        | 5   | 0.515 | 1.022 | 0.453 | 0.719 | 1.000 | 4322 |
| REACTOME_CYTOCHROME_C_MEDIATED_APOPTOTIC_RESPONSE                        | 13  | 0.400 | 1.021 | 0.415 | 0.721 | 1.000 | 1851 |
| REACTOME_CELLULAR_RESPONSE_TO_HEAT_STRESS                                | 93  | 0.259 | 1.021 | 0.401 | 0.720 | 1.000 | 3960 |
| REACTOME_ACTIVATION_OF_NIMA_KINASES_NEK9_NEK6_NEK7                       | 7   | 0.474 | 1.021 | 0.451 | 0.719 | 1.000 | 3550 |
| REACTOME_TERMINAL_PATHWAY_OF_COMPLEMENT                                  | 2   | 0.663 | 1.019 | 0.483 | 0.721 | 1.000 | 1785 |
| REACTOME_G_ALPHA_12_13_SIGNALING_EVENTS                                  | 60  | 0.278 | 1.019 | 0.413 | 0.720 | 1.000 | 2238 |
| REACTOME_TETRAHYDROBIOTIN_BH4_SYNTHESIS_RECYCLING_SALVAGE_AND_REGULATION | 9   | 0.448 | 1.018 | 0.442 | 0.723 | 1.000 | 2078 |

|                                                                                 |     |       |       |       |       |       |      |
|---------------------------------------------------------------------------------|-----|-------|-------|-------|-------|-------|------|
| REACTOME_PHOSPHATE_BOND_HYDROLYSIS_BY_NTPDASE_PROTEINS                          | 6   | 0.480 | 1.016 | 0.448 | 0.725 | 1.000 | 1855 |
| REACTOME_DOWNSTREAM_SIGNAL_TRANSDUCTION                                         | 28  | 0.329 | 1.016 | 0.438 | 0.724 | 1.000 | 4150 |
| REACTOME_SIGNALING_BY_BRAF_AND_RAF_FUSIONS                                      | 57  | 0.279 | 1.016 | 0.409 | 0.723 | 1.000 | 897  |
| REACTOME_C_TYPE_LECTIN_RECEPTORS_CLRS                                           | 112 | 0.250 | 1.014 | 0.414 | 0.726 | 1.000 | 3985 |
| REACTOME_WAX_AND_PLASMA_LOGEN_BIOSYNTHESIS                                      | 4   | 0.547 | 1.012 | 0.492 | 0.729 | 1.000 | 793  |
| REACTOME_GLYCOLYSIS                                                             | 62  | 0.276 | 1.012 | 0.412 | 0.729 | 1.000 | 2666 |
| REACTOME_GLYCOGEN_BREAKDOWN_GLYCOGENOLYSIS                                      | 15  | 0.384 | 1.012 | 0.417 | 0.729 | 1.000 | 407  |
| REACTOME_G_BETA_GAMMA_SIGNALING_THROUGH_CDC42                                   | 9   | 0.441 | 1.011 | 0.434 | 0.728 | 1.000 | 2180 |
| REACTOME_SIGNALING_BY_NOTCH1_PEST_DOMAIN_MUTANTS_IN_CANCER                      | 56  | 0.278 | 1.011 | 0.430 | 0.728 | 1.000 | 3349 |
| REACTOME_RAS_PROCESSING                                                         | 23  | 0.339 | 1.011 | 0.435 | 0.728 | 1.000 | 4173 |
| REACTOME_LRR_FLII_INTERACTING_PROTEIN_1_LRRFIP1_ACTIVATES_TYPE_I_IFN_PRODUCTION | 5   | 0.512 | 1.010 | 0.473 | 0.727 | 1.000 | 5361 |
| REACTOME_GABA_B_RECEPTOR_ACTIVATION                                             | 19  | 0.361 | 1.010 | 0.451 | 0.726 | 1.000 | 2182 |
| REACTOME_CARGO_TRAFFICKING_TO_THE_PERICILIARY_MEMBRANE                          | 43  | 0.290 | 1.007 | 0.451 | 0.734 | 1.000 | 3223 |
| REACTOME_RNA_POLYMERASE_III_TRANSCRIPTION_INITIATION_FROM_TYPE_3_PROMOTER       | 28  | 0.321 | 1.006 | 0.437 | 0.733 | 1.000 | 1350 |
| REACTOME_PROSTANOID_LIGAND_RECEPTORS                                            | 1   | 0.755 | 1.005 | 0.486 | 0.736 | 1.000 | 3119 |
| REACTOME_GLUCAGON_TYPE_LIGAND_RECEPTORS                                         | 11  | 0.399 | 1.002 | 0.471 | 0.740 | 1.000 | 2180 |
| REACTOME_HCMV_EARLY_EVENTS                                                      | 72  | 0.271 | 1.002 | 0.457 | 0.740 | 1.000 | 2166 |
| REACTOME_SIGNALING_BY_NODAL                                                     | 12  | 0.408 | 1.002 | 0.466 | 0.739 | 1.000 | 1248 |
| REACTOME_CONSTITUTIVE_SIGNALING_BY_LIGAND_RESPONSIVE_EGFR_CANCER_VARIANTS       | 16  | 0.368 | 1.001 | 0.453 | 0.739 | 1.000 | 2078 |
| REACTOME_PHOSPHATE_BOND_HYDROLYSIS_BY_NUDT_PROTEINS                             | 7   | 0.463 | 1.000 | 0.472 | 0.740 | 1.000 | 361  |
| REACTOME_GLYCOGEN_STORAGE_DISEASES                                              | 12  | 0.411 | 1.000 | 0.470 | 0.740 | 1.000 | 1569 |
| REACTOME_SIGNALING_BY_ERBB2_IN_CANCER                                           | 18  | 0.367 | 1.000 | 0.454 | 0.740 | 1.000 | 2078 |
| REACTOME_MITOPHAGY                                                              | 28  | 0.326 | 0.999 | 0.483 | 0.741 | 1.000 | 3779 |
| REACTOME_PEPTIDE_HORMONE_METABOLISM                                             | 44  | 0.288 | 0.997 | 0.445 | 0.744 | 1.000 | 3910 |

|                                                                                                               |     |       |       |       |       |       |      |
|---------------------------------------------------------------------------------------------------------------|-----|-------|-------|-------|-------|-------|------|
| REACTOME_G_BETA_GAMMA_S<br>IGNALLING_THROUGH_PI3KGA<br>MMA                                                    | 12  | 0.406 | 0.996 | 0.467 | 0.745 | 1.000 | 3691 |
| REACTOME_TRAFFICKING_OF_M<br>YRISTOYLATED_PROTEINS_TO_T<br>HE_CILIUM                                          | 4   | 0.556 | 0.995 | 0.511 | 0.746 | 1.000 | 2792 |
| REACTOME_ASPARTATE_AND_A<br>SPARAGINE_METABOLISM                                                              | 6   | 0.482 | 0.995 | 0.481 | 0.745 | 1.000 | 104  |
| REACTOME_SYNTHESIS_OF_IP2_<br>IP_AND_INS_IN_THE_CYTOSOL                                                       | 11  | 0.414 | 0.995 | 0.438 | 0.745 | 1.000 | 3126 |
| REACTOME_SIGNALING_BY_SCF<br>_KIT                                                                             | 38  | 0.299 | 0.993 | 0.454 | 0.747 | 1.000 | 3953 |
| REACTOME_FCERI_MEDIATED_N<br>F_KB_ACTIVATION                                                                  | 73  | 0.264 | 0.992 | 0.461 | 0.749 | 1.000 | 4312 |
| REACTOME_PROTEIN_UBIQUITI<br>NATION                                                                           | 65  | 0.269 | 0.991 | 0.470 | 0.749 | 1.000 | 4677 |
| REACTOME_RUNX1_REGULATES<br>_TRANSCRIPTION_OF_GENES_IN<br>VOLVED_IN_INTERLEUKIN_SIGN<br>ALING                 | 3   | 0.594 | 0.991 | 0.530 | 0.749 | 1.000 | 1908 |
| REACTOME_PROTON_COUPLED_<br>MONOCARBOXYLATE_TRANSPO<br>RT                                                     | 3   | 0.586 | 0.990 | 0.534 | 0.750 | 1.000 | 4862 |
| REACTOME_INTERACTIONS_OF_<br>VPR_WITH_HOST_CELLULAR_PR<br>OTEINS                                              | 37  | 0.298 | 0.987 | 0.490 | 0.757 | 1.000 | 2493 |
| REACTOME_SIGNALING_BY_FGF<br>R2_III_A_TM                                                                      | 16  | 0.363 | 0.984 | 0.480 | 0.761 | 1.000 | 2357 |
| REACTOME_PTK6_REGULATES_P<br>ROTEINS_INVOLVED_IN_RNA_PR<br>OCCESSING                                          | 4   | 0.535 | 0.984 | 0.518 | 0.760 | 1.000 | 5907 |
| REACTOME_TGF_BETA_RECEPTO<br>R_SIGNALING_IN_EMT_EPITHELI<br>AL_TO_MESENCHYMAL_TRANSIT<br>ION_                 | 16  | 0.370 | 0.984 | 0.496 | 0.760 | 1.000 | 4568 |
| REACTOME_HIV_INFECTION                                                                                        | 218 | 0.220 | 0.984 | 0.504 | 0.759 | 1.000 | 4215 |
| REACTOME_GLUTATHIONE_CON<br>JUGATION                                                                          | 22  | 0.334 | 0.982 | 0.480 | 0.762 | 1.000 | 2897 |
| REACTOME_NOD1_2_SIGNALIN<br>G_PATHWAY                                                                         | 35  | 0.300 | 0.982 | 0.488 | 0.761 | 1.000 | 1873 |
| REACTOME_TRANSPORT_OF_NU<br>CLEOSIDES_AND_FREE_PURINE_<br>AND_PYRIMIDINE_BASES_ACRO<br>SS_THE_PLASMA_MEMBRANE | 9   | 0.420 | 0.982 | 0.509 | 0.761 | 1.000 | 1623 |
| REACTOME_FACTORS_INVOLVE<br>D_IN_MEGAKARYOCYTE_DEVEL<br>OPMENT_AND_PLATELET_PROD<br>UCTION                    | 117 | 0.237 | 0.975 | 0.524 | 0.774 | 1.000 | 2543 |
| REACTOME_CHOLINE_CATABOLI<br>SM                                                                               | 4   | 0.537 | 0.975 | 0.535 | 0.774 | 1.000 | 588  |
| REACTOME_HDMS_DEMETHYLA<br>TE_HISTONES                                                                        | 21  | 0.341 | 0.974 | 0.508 | 0.775 | 1.000 | 3618 |

|                                                                                            |     |       |       |       |       |       |      |
|--------------------------------------------------------------------------------------------|-----|-------|-------|-------|-------|-------|------|
| REACTOME_SOS_MEDIATED_SIG<br>NALLING                                                       | 7   | 0.456 | 0.970 | 0.513 | 0.782 | 1.000 | 5166 |
| REACTOME_REGULATION_OF_H<br>SF1_MEDIATED_HEAT_SHOCK_R<br>ESPONSE                           | 76  | 0.254 | 0.970 | 0.508 | 0.782 | 1.000 | 3960 |
| REACTOME_INACTIVATION_OF_<br>CDC42_AND_RAC1                                                | 6   | 0.472 | 0.969 | 0.496 | 0.782 | 1.000 | 2378 |
| REACTOME_TRANSCRIPTIONAL_<br>REGULATION_BY_RUNX2                                           | 101 | 0.242 | 0.968 | 0.505 | 0.783 | 1.000 | 4312 |
| REACTOME_NRAGE_SIGNALS_D<br>EATH_THROUGH_JNK                                               | 52  | 0.273 | 0.968 | 0.523 | 0.784 | 1.000 | 977  |
| REACTOME_SULFIDE_OXIDATIO<br>N_TO_SULFATE                                                  | 6   | 0.473 | 0.967 | 0.496 | 0.784 | 1.000 | 1093 |
| REACTOME_INTERFERON_SIGNA<br>LING                                                          | 142 | 0.231 | 0.967 | 0.559 | 0.783 | 1.000 | 2948 |
| REACTOME_PROCESSING_AND_<br>ACTIVATION_OF_SUMO                                             | 10  | 0.400 | 0.966 | 0.494 | 0.785 | 1.000 | 2915 |
| REACTOME_NEUROTRANSMITTE<br>R_RELEASE_CYCLE                                                | 25  | 0.321 | 0.965 | 0.494 | 0.785 | 1.000 | 3186 |
| REACTOME_HCMV_INFECTION                                                                    | 96  | 0.241 | 0.964 | 0.550 | 0.786 | 1.000 | 2703 |
| REACTOME_AQUAPORIN_MEDIA<br>TED_TRANSPORT                                                  | 24  | 0.321 | 0.963 | 0.518 | 0.786 | 1.000 | 2333 |
| REACTOME_ABORTIVE_ELONGA<br>TION_OF_HIV_1_TRANSCRIPT_I<br>N_THE_ABSENCE_OF_TAT             | 23  | 0.328 | 0.962 | 0.527 | 0.788 | 1.000 | 2357 |
| REACTOME_DISEASES_ASSOCIAT<br>ED_WITH_GLYCOSYLATION_PRE<br>CURSOR_BIOSYNTHESIS             | 18  | 0.342 | 0.961 | 0.508 | 0.789 | 1.000 | 2566 |
| REACTOME_INWARDLY_RECTIFY<br>ING_K_CHANNELS                                                | 13  | 0.378 | 0.960 | 0.518 | 0.792 | 1.000 | 782  |
| REACTOME_INLB_MEDIATED_EN<br>TRY_OF_LISTERIA_MONOCYTOG<br>ENES_INTO_HOST_CELL              | 13  | 0.377 | 0.959 | 0.512 | 0.791 | 1.000 | 1771 |
| REACTOME_NEDDYLATION                                                                       | 208 | 0.214 | 0.953 | 0.571 | 0.805 | 1.000 | 3531 |
| REACTOME_REMOVAL_OF_AMI<br>NOTERMINAL_PROPEPTIDES_FR<br>OM_GAMMA_CARBOXYLATED_P<br>ROTEINS | 7   | 0.436 | 0.952 | 0.521 | 0.805 | 1.000 | 1464 |
| REACTOME_DOWNSTREAM_SIG<br>NALING_OF_ACTIVATED_FGFR2                                       | 15  | 0.355 | 0.951 | 0.532 | 0.806 | 1.000 | 1020 |
| REACTOME_BETA_OXIDATION_<br>OF_BUTANOYL_COA_TO_ACETYL<br>_COA                              | 3   | 0.558 | 0.951 | 0.587 | 0.807 | 1.000 | 2693 |
| REACTOME_GAMMA_CARBOXYL<br>ATION_TRANSPORT_AND_AMIN<br>O_TERMINAL_CLEAVAGE_OF_PR<br>OTEINS | 8   | 0.434 | 0.951 | 0.515 | 0.806 | 1.000 | 1464 |
| REACTOME_REGULATION_OF_KI<br>T_SIGNALING                                                   | 15  | 0.370 | 0.951 | 0.519 | 0.805 | 1.000 | 1443 |
| REACTOME_FGFR1C_LIGAND_BI<br>NDING_AND_ACTIVATION                                          | 2   | 0.624 | 0.949 | 0.598 | 0.807 | 1.000 | 4782 |

|                                                                                       |     |       |       |       |       |       |      |
|---------------------------------------------------------------------------------------|-----|-------|-------|-------|-------|-------|------|
| REACTOME_TRANSCRIPTIONAL_REGULATION_BY_TP53                                           | 343 | 0.204 | 0.946 | 0.620 | 0.812 | 1.000 | 2789 |
| REACTOME_SIGNAL_REGULATORY_PROTEIN_FAMILY_INTERACTIONS                                | 10  | 0.396 | 0.945 | 0.559 | 0.814 | 1.000 | 5160 |
| REACTOME_DOWNSTREAM_SIGNALING_OF_ACTIVATED_FGFR4                                      | 16  | 0.340 | 0.944 | 0.541 | 0.814 | 1.000 | 1020 |
| REACTOME_NUCLEOTIDE_LIKE_PURINERGIC_RECEPTORS                                         | 5   | 0.473 | 0.944 | 0.542 | 0.814 | 1.000 | 2269 |
| REACTOME_FGFR1_MUTANT_RECEPTOR_ACTIVATION                                             | 22  | 0.327 | 0.941 | 0.559 | 0.819 | 1.000 | 4894 |
| REACTOME_REGULATION_OF_RAS_BY_GAPS                                                    | 64  | 0.258 | 0.941 | 0.566 | 0.818 | 1.000 | 4312 |
| REACTOME_MET_ACTIVATES_PTEN1                                                          | 3   | 0.563 | 0.941 | 0.590 | 0.817 | 1.000 | 1771 |
| REACTOME_CYP2E1_REACTIONS                                                             | 3   | 0.567 | 0.939 | 0.610 | 0.819 | 1.000 | 1194 |
| REACTOME_SLC_MEDIATED_TRANSMEMBRANE_TRANSPORT                                         | 132 | 0.229 | 0.938 | 0.611 | 0.821 | 1.000 | 2055 |
| REACTOME_DECTIN_1_MEDIATED_NONCANONICAL_NF_KB_SIGNALING                               | 58  | 0.257 | 0.934 | 0.579 | 0.828 | 1.000 | 4312 |
| REACTOME_HEDGEHOG_OFF_STATE                                                           | 97  | 0.236 | 0.934 | 0.596 | 0.828 | 1.000 | 3985 |
| REACTOME_CELL_DEATH_SIGNALING_VIA_NRAGE_NRIF_AND_NF_KB                                | 69  | 0.248 | 0.931 | 0.599 | 0.833 | 1.000 | 2765 |
| REACTOME_TP53_REGULATES_TRANSCRIPTION_OF_GENES_INVOLVED_IN_G1_CELL_CYCLE_ARREST       | 13  | 0.357 | 0.931 | 0.564 | 0.832 | 1.000 | 1059 |
| REACTOME_OPSINS                                                                       | 1   | 0.701 | 0.930 | 0.618 | 0.833 | 1.000 | 3803 |
| REACTOME_FOXO_MEDIATED_TRANSCRIPTION_OF_OXIDATIVE_STRESS_METABOLIC_AND_NEURONAL_GENES | 20  | 0.320 | 0.928 | 0.555 | 0.837 | 1.000 | 3687 |
| REACTOME_INTERLEUKIN_1_FAMILY_SIGNALING                                               | 108 | 0.227 | 0.928 | 0.600 | 0.836 | 1.000 | 3985 |
| REACTOME_DIGESTION                                                                    | 2   | 0.613 | 0.927 | 0.597 | 0.837 | 1.000 | 2844 |
| REACTOME_CD22_MEDIATED_B_CELL_REGULATION                                              | 2   | 0.613 | 0.925 | 0.619 | 0.839 | 1.000 | 4915 |
| REACTOME_RAB_REGULATION_OF_TRAFFICKING                                                | 111 | 0.226 | 0.924 | 0.625 | 0.841 | 1.000 | 3691 |
| REACTOME_DISEASES_OF_IMMUNE_SYSTEM                                                    | 16  | 0.339 | 0.923 | 0.569 | 0.842 | 1.000 | 317  |
| REACTOME_N_GLYCAN_TRIMMING_IN_THE_ER_AND_CALNEXIN_CALRETICULIN_CYCLE                  | 35  | 0.281 | 0.921 | 0.559 | 0.845 | 1.000 | 4151 |
| REACTOME_CRMP5_IN_SEMA3A_SIGNALING                                                    | 12  | 0.367 | 0.921 | 0.566 | 0.845 | 1.000 | 1589 |
| REACTOME_BETA_OXIDATION_OF_OCTANOYL_COA_TO_HEXANOYL_COA                               | 5   | 0.479 | 0.920 | 0.595 | 0.847 | 1.000 | 4043 |

|                                                                                                               |     |       |       |       |       |       |      |
|---------------------------------------------------------------------------------------------------------------|-----|-------|-------|-------|-------|-------|------|
| REACTOME_SIGNALING_BY_WN<br>T                                                                                 | 221 | 0.206 | 0.918 | 0.668 | 0.850 | 1.000 | 3642 |
| REACTOME_G_ALPHA_S_SIGNAL<br>LING_EVENTS                                                                      | 51  | 0.260 | 0.917 | 0.609 | 0.849 | 1.000 | 3387 |
| REACTOME_INTERLEUKIN_37_SI<br>GNALING                                                                         | 14  | 0.349 | 0.916 | 0.606 | 0.850 | 1.000 | 3101 |
| REACTOME_HIV_ELONGATION_<br>ARREST_AND_RECOVERY                                                               | 32  | 0.289 | 0.916 | 0.596 | 0.849 | 1.000 | 2789 |
| REACTOME_ANTI_INFLAMMATO<br>RY_RESPONSE_FAVOURING_LEIS<br>HMANIA_PARASITE_INFECTION                           | 58  | 0.251 | 0.915 | 0.595 | 0.850 | 1.000 | 2269 |
| REACTOME_BETA_OXIDATION_<br>OF_LAUROYL_COA_TO_DECANO<br>YL_COA_COA                                            | 4   | 0.503 | 0.915 | 0.596 | 0.849 | 1.000 | 4043 |
| REACTOME_DEGRADATION_OF_<br>GLI1_BY_THE_PROTEASOME                                                            | 56  | 0.257 | 0.915 | 0.622 | 0.848 | 1.000 | 4312 |
| REACTOME_NUCLEOTIDE_BINDI<br>NG_DOMAIN_LEUCINE_RICH_RE<br>PEAT_CONTAINING_RECEPTOR_<br>NLR_SIGNALING_PATHWAYS | 47  | 0.264 | 0.915 | 0.606 | 0.847 | 1.000 | 2186 |
| REACTOME_SIGNALING_BY_FGF<br>R2_IN_DISEASE                                                                    | 28  | 0.300 | 0.915 | 0.601 | 0.847 | 1.000 | 2357 |
| REACTOME_FGFR2B_LIGAND_BI<br>NDING_AND_ACTIVATION                                                             | 3   | 0.550 | 0.915 | 0.627 | 0.846 | 1.000 | 1506 |
| REACTOME_CASPASE_ACTIVATI<br>ON_VIA_EXTRINSIC_APOPTOTIC<br>_SIGNALLING_PATHWAY                                | 21  | 0.312 | 0.912 | 0.599 | 0.850 | 1.000 | 400  |
| REACTOME_SODIUM_PROTON_<br>EXCHANGERS                                                                         | 5   | 0.462 | 0.911 | 0.583 | 0.851 | 1.000 | 1807 |
| REACTOME_GABA_RECEPTOR_A<br>CTIVATION                                                                         | 24  | 0.300 | 0.911 | 0.632 | 0.851 | 1.000 | 2182 |
| REACTOME_CYTOSOLIC_SULFON<br>ATION_OF_SMALL_MOLECULES                                                         | 15  | 0.338 | 0.910 | 0.545 | 0.851 | 1.000 | 1170 |
| REACTOME_PINK1_PRKN_MEDI<br>ATED_MITOPHAGY                                                                    | 21  | 0.313 | 0.910 | 0.586 | 0.850 | 1.000 | 2103 |
| REACTOME_REGULATION_OF_R<br>UNX3_EXPRESSION_AND_ACTIVI<br>TY                                                  | 55  | 0.250 | 0.910 | 0.637 | 0.850 | 1.000 | 5361 |
| REACTOME_JNK_C_JUN_KINASE<br>S_PHOSPHORYLATION_AND_ACT<br>IVATION_MEDIATED_BY_ACTIVA<br>TED_HUMAN_TAK1        | 21  | 0.306 | 0.907 | 0.577 | 0.855 | 1.000 | 2841 |
| REACTOME_GAP_JUNCTION_DE<br>GRADATION                                                                         | 11  | 0.372 | 0.907 | 0.581 | 0.854 | 1.000 | 3583 |
| REACTOME_TRYPTOPHAN_CATA<br>BOLISM                                                                            | 8   | 0.407 | 0.905 | 0.581 | 0.856 | 1.000 | 1870 |
| REACTOME_ROLE_OF_ABL_IN_R<br>OBO_SLIT_SIGNALING                                                               | 7   | 0.414 | 0.902 | 0.586 | 0.861 | 1.000 | 2310 |
| REACTOME_METABOLISM_OF_C<br>OFACTORS                                                                          | 18  | 0.322 | 0.902 | 0.583 | 0.861 | 1.000 | 2338 |
| REACTOME_APC_C_CDC20_MED<br>IATED_DEGRADATION_OF_CYCLI<br>N_B                                                 | 24  | 0.301 | 0.900 | 0.601 | 0.864 | 1.000 | 3779 |

|                                                                                     |    |       |       |       |       |       |      |
|-------------------------------------------------------------------------------------|----|-------|-------|-------|-------|-------|------|
| REACTOME_THROMBOXANE_SIGNALING_THROUGH_TP_RECEPTOR                                  | 11 | 0.367 | 0.900 | 0.605 | 0.863 | 1.000 | 2180 |
| REACTOME_SARS_COV_1_INFECTION                                                       | 46 | 0.258 | 0.899 | 0.646 | 0.864 | 1.000 | 2628 |
| REACTOME_HUR_ELAVL1_BINDS_AND_STABILIZES_MRNA                                       | 8  | 0.401 | 0.898 | 0.601 | 0.866 | 1.000 | 619  |
| REACTOME_CD28_CO_STIMULATION                                                        | 28 | 0.293 | 0.897 | 0.619 | 0.867 | 1.000 | 2415 |
| REACTOME_NOTCH3_ACTIVATION_AND_TRANSMISSION_OF_SIGNAL_TO_THE_NUCLEUS                | 21 | 0.305 | 0.893 | 0.622 | 0.874 | 1.000 | 1569 |
| REACTOME_RUNX1_REGULATES_TRANSCRIPTION_OF_GENES_INVOLVED_IN_DIFFERENTIATION_OF_HSCS | 74 | 0.235 | 0.892 | 0.670 | 0.874 | 1.000 | 4339 |
| REACTOME_FCGR_ACTIVATION                                                            | 5  | 0.467 | 0.891 | 0.616 | 0.875 | 1.000 | 576  |
| REACTOME_DEGRADATION_OF_BETA_CATENIN_BY_THE_DESTRUCTION_COMPLEX                     | 80 | 0.230 | 0.890 | 0.666 | 0.876 | 1.000 | 4312 |
| REACTOME_SUMOYLATION_OF_TRANSCRIPTION_COFACTORS                                     | 43 | 0.254 | 0.888 | 0.648 | 0.879 | 1.000 | 2977 |
| REACTOME_METHIONINE_SALVAGE_PATHWAY                                                 | 6  | 0.429 | 0.887 | 0.611 | 0.880 | 1.000 | 2706 |
| REACTOME_FORMATION_OF_ATP_BY_CHEMIOSMOTIC_COUPLING                                  | 16 | 0.326 | 0.886 | 0.631 | 0.881 | 1.000 | 5312 |
| REACTOME_SULFUR_AMINO_ACID_METABOLISM                                               | 22 | 0.300 | 0.884 | 0.626 | 0.886 | 1.000 | 1967 |
| REACTOME_APOPTOSIS_INDUCED_DNA_FRAGMENTATION                                        | 9  | 0.384 | 0.882 | 0.615 | 0.888 | 1.000 | 2155 |
| REACTOME_MYOCLONIC_EPILEPSY_OF_LAFORA                                               | 7  | 0.406 | 0.880 | 0.627 | 0.892 | 1.000 | 1569 |
| REACTOME_TAK1_ACTIVATES_NFKB_BY_PHOSPHORYLATION_AND_ACTIVATION_OF_IKKS_COMPLEX      | 29 | 0.281 | 0.879 | 0.638 | 0.893 | 1.000 | 2936 |
| REACTOME_ACYL_CHAIN_REMODELING_OF_PI                                                | 6  | 0.419 | 0.874 | 0.639 | 0.902 | 1.000 | 231  |
| REACTOME_SEMA3A_PLEXIN_REPULSION_SIGNALING_BY_INHIBITING_INTEGRIN_ADHESION          | 12 | 0.346 | 0.874 | 0.639 | 0.901 | 1.000 | 2938 |
| REACTOME_NOREPINEPHRINE_NEUROTRANSMITTER_RELEASE_CYCLE                              | 10 | 0.357 | 0.873 | 0.640 | 0.901 | 1.000 | 1496 |
| REACTOME_PP2A_MEDIATED_DEPHOSPHORYLATION_OF_KEY_METABOLIC_FACTORS                   | 6  | 0.421 | 0.872 | 0.651 | 0.903 | 1.000 | 2088 |
| REACTOME_SYNTHESIS_OF_PIP3_AT_THE_PLASMA_MEMBRANE                                   | 45 | 0.251 | 0.870 | 0.691 | 0.905 | 1.000 | 3736 |
| REACTOME_METABOLISM_OF_INGESTED_SEMET_SEC_MESEC_INTO_H2SE                           | 4  | 0.472 | 0.870 | 0.635 | 0.904 | 1.000 | 312  |

|                                                                              |     |       |       |       |       |       |      |
|------------------------------------------------------------------------------|-----|-------|-------|-------|-------|-------|------|
| REACTOME_VLDL_CLEARANCE                                                      | 3   | 0.517 | 0.870 | 0.646 | 0.903 | 1.000 | 406  |
| REACTOME_MAPK6_MAPK4_SIG<br>NALING                                           | 82  | 0.229 | 0.869 | 0.700 | 0.903 | 1.000 | 3985 |
| REACTOME_MRNA_CAPPING                                                        | 28  | 0.285 | 0.869 | 0.654 | 0.903 | 1.000 | 2549 |
| REACTOME_SUMO_IS_TRANSFE<br>RRED_FROM_E1_TO_E2_UBE2I_<br>UBC9_               | 7   | 0.403 | 0.869 | 0.644 | 0.902 | 1.000 | 4031 |
| REACTOME_FOLDING_OF_ACTIN<br>_BY_CCT_TRIC                                    | 9   | 0.380 | 0.868 | 0.626 | 0.903 | 1.000 | 3065 |
| REACTOME_APC_CDC20_MEDIA<br>TED_DEGRADATION_OF_NEK2A                         | 26  | 0.283 | 0.866 | 0.660 | 0.905 | 1.000 | 3290 |
| REACTOME_ALTERNATIVE_COM<br>PLEMENT_ACTIVATION                               | 4   | 0.471 | 0.866 | 0.642 | 0.904 | 1.000 | 2284 |
| REACTOME_INTERLEUKIN_1_SIG<br>NALING                                         | 92  | 0.222 | 0.866 | 0.740 | 0.903 | 1.000 | 4312 |
| REACTOME_NRCAM_INTERACTI<br>ONS                                              | 6   | 0.422 | 0.866 | 0.652 | 0.902 | 1.000 | 2486 |
| REACTOME_PHASE_2_PLATEAU_<br>PHASE                                           | 9   | 0.375 | 0.864 | 0.611 | 0.904 | 1.000 | 2515 |
| REACTOME_RUNX1_REGULATES<br>_EXPRESSION_OF_COMPONENT<br>S_OF_TIGHT_JUNCTIONS | 4   | 0.474 | 0.864 | 0.632 | 0.903 | 1.000 | 3465 |
| REACTOME_DOWNSTREAM_SIG<br>NALING_OF_ACTIVATED_FGFR3                         | 15  | 0.326 | 0.864 | 0.673 | 0.902 | 1.000 | 1136 |
| REACTOME_TIGHT_JUNCTION_I<br>NTERACTIONS                                     | 17  | 0.320 | 0.862 | 0.655 | 0.904 | 1.000 | 1401 |
| REACTOME_TIE2_SIGNALING                                                      | 13  | 0.343 | 0.861 | 0.659 | 0.905 | 1.000 | 816  |
| REACTOME_NOTCH_HLH_TRANS<br>CRIPTION_PATHWAY                                 | 27  | 0.280 | 0.859 | 0.663 | 0.908 | 1.000 | 3349 |
| REACTOME_APOPTOTIC_FACTO<br>R_MEDIATED_RESPONSE                              | 18  | 0.303 | 0.859 | 0.670 | 0.908 | 1.000 | 1851 |
| REACTOME_SYNTHESIS_OF_GLY<br>COSYLPHOSPHATIDYLINOSITOL_<br>GPI_              | 16  | 0.314 | 0.858 | 0.634 | 0.908 | 1.000 | 2009 |
| REACTOME_FRS_MEDIATED_FGF<br>R2_SIGNALING                                    | 11  | 0.346 | 0.856 | 0.644 | 0.912 | 1.000 | 1020 |
| REACTOME_SIGNALING_BY_NOT<br>CH                                              | 166 | 0.198 | 0.853 | 0.843 | 0.917 | 1.000 | 4196 |
| REACTOME_SODIUM_COUPLED_<br>PHOSPHATE_COTRANSPORTERS                         | 2   | 0.572 | 0.852 | 0.746 | 0.917 | 1.000 | 1486 |
| REACTOME_DISEASES_OF_PROG<br>RAMMED_CELL_DEATH                               | 23  | 0.287 | 0.852 | 0.666 | 0.916 | 1.000 | 2215 |
| REACTOME_REGULATION_OF_F<br>OXO_TRANSCRIPTIONAL_ACTIVI<br>TY_BY_ACETYLATION  | 10  | 0.361 | 0.850 | 0.660 | 0.919 | 1.000 | 2775 |
| REACTOME_GLUTATHIONE_SYN<br>THESIS_AND_RECYCLING                             | 10  | 0.356 | 0.849 | 0.647 | 0.919 | 1.000 | 1552 |
| REACTOME_CONSTITUTIVE_SIG<br>NALING_BY_OVEREXPRESSED_E<br>RBB2               | 11  | 0.355 | 0.848 | 0.663 | 0.920 | 1.000 | 4750 |

|                                                                                          |     |       |       |       |       |       |      |
|------------------------------------------------------------------------------------------|-----|-------|-------|-------|-------|-------|------|
| REACTOME_ACETYLCHOLINE_NEUROTRANSMITTER_RELEASE_CYCLE                                    | 10  | 0.357 | 0.846 | 0.651 | 0.923 | 1.000 | 1496 |
| REACTOME_GLUCOSE_METABOLISM                                                              | 77  | 0.226 | 0.846 | 0.755 | 0.922 | 1.000 | 2706 |
| REACTOME_FORMATION_OF_THE_EARLY_ELONGATION_COMPLEX                                       | 32  | 0.258 | 0.843 | 0.725 | 0.927 | 1.000 | 2549 |
| REACTOME_HIV_LIFE_CYCLE                                                                  | 144 | 0.200 | 0.842 | 0.833 | 0.927 | 1.000 | 3118 |
| REACTOME_TFAP2_AP_2_FAMILY_REGULATES_TRANSCRIPTION_OF_GROWTH_FACTORS_AND_THEIR_RECEPTORS | 7   | 0.392 | 0.841 | 0.656 | 0.928 | 1.000 | 1649 |
| REACTOME_CLEC7A_DECTIN_1_SIGNALING                                                       | 94  | 0.213 | 0.841 | 0.790 | 0.928 | 1.000 | 4312 |
| REACTOME_CONSTITUTIVE_SIGNALING_BY_AKT1_E17K_IN_CANCER                                   | 26  | 0.273 | 0.838 | 0.699 | 0.931 | 1.000 | 2117 |
| REACTOME_RAB_GEF_EXCHANGE_GTP_FOR_GDP_ON_RABS                                            | 82  | 0.216 | 0.837 | 0.768 | 0.933 | 1.000 | 3691 |
| REACTOME_STABILIZATION_OF_P53                                                            | 55  | 0.231 | 0.836 | 0.741 | 0.933 | 1.000 | 4568 |
| REACTOME_SIGNALING_BY_HEDGEHOG                                                           | 123 | 0.204 | 0.836 | 0.841 | 0.932 | 1.000 | 3985 |
| REACTOME_ORGANIC_CATION_ANION_ZWITTERION_TRANSPORT                                       | 6   | 0.401 | 0.836 | 0.663 | 0.931 | 1.000 | 155  |
| REACTOME_DEGRADATION_OF_CYSTEINE_AND_HOMOCYSTEINE                                        | 12  | 0.336 | 0.836 | 0.677 | 0.930 | 1.000 | 1093 |
| REACTOME_RNA_POLYMERASE_III_TRANSCRIPTION_INITIATION_FROM_TYPE_1_PROMOTER                | 28  | 0.271 | 0.836 | 0.724 | 0.930 | 1.000 | 803  |
| REACTOME_AUF1_HNRNP_D0_BINDS_AND_DESTABILIZES_MRNA                                       | 53  | 0.233 | 0.834 | 0.763 | 0.931 | 1.000 | 4312 |
| REACTOME_RUNX1_REGULATES_TRANSCRIPTION_OF_GENES_INVOLVED_IN_WNT_SIGNALING                | 4   | 0.453 | 0.833 | 0.682 | 0.931 | 1.000 | 1908 |
| REACTOME_TRAF6_MEDIATED_IRF7_ACTIVATION_IN_TLR7_8_OR_9_SIGNALING                         | 11  | 0.336 | 0.831 | 0.693 | 0.934 | 1.000 | 3779 |
| REACTOME_HIV_TRANSCRIPTION_ELONGATION                                                    | 41  | 0.247 | 0.830 | 0.754 | 0.936 | 1.000 | 2789 |
| REACTOME_MISCELLANEOUS_TRANSPORT_AND_BINDING_EVENTS                                      | 21  | 0.281 | 0.830 | 0.707 | 0.935 | 1.000 | 2392 |
| REACTOME_ORGANIC_CATION_TRANSPORT                                                        | 6   | 0.401 | 0.828 | 0.690 | 0.937 | 1.000 | 155  |
| REACTOME_UCH_PROTEINASES                                                                 | 83  | 0.212 | 0.828 | 0.820 | 0.937 | 1.000 | 4908 |
| REACTOME_DEFECTIVE_CFTR_CAUSES_CYSTIC_FIBROSIS                                           | 58  | 0.229 | 0.825 | 0.775 | 0.940 | 1.000 | 4312 |
| REACTOME_FRS_MEDIATED_FGF_R4_SIGNALING                                                   | 12  | 0.324 | 0.823 | 0.675 | 0.943 | 1.000 | 1020 |

|                                                                                         |    |       |       |       |       |       |      |
|-----------------------------------------------------------------------------------------|----|-------|-------|-------|-------|-------|------|
| REACTOME_BETA_CATENIN_PHOSPHORYLATION_CASCADE                                           | 16 | 0.300 | 0.822 | 0.716 | 0.944 | 1.000 | 3597 |
| REACTOME_SIGNALING_BY_MEMBRANE_TETHERED_FUSIONS_OF_PDGFR_A_OR_PDGFR_B                   | 3  | 0.480 | 0.820 | 0.709 | 0.946 | 1.000 | 484  |
| REACTOME_ACTIVATION_OF_PPARGC1A_PGC_1ALPHA_BY_PHOSPHORYLATION                           | 9  | 0.360 | 0.820 | 0.705 | 0.945 | 1.000 | 568  |
| REACTOME_ENDOSOMAL_SORTING_COMPLEX_REQUIRED_FOR_TRANSPORT_ESCRT                         | 31 | 0.260 | 0.820 | 0.760 | 0.944 | 1.000 | 2703 |
| REACTOME_METABOLISM_OF_POLYAMINES                                                       | 57 | 0.225 | 0.819 | 0.778 | 0.944 | 1.000 | 4312 |
| REACTOME_MTOR_SIGNALLING                                                                | 39 | 0.244 | 0.819 | 0.776 | 0.944 | 1.000 | 2367 |
| REACTOME_TRIGLYCERIDE_BIOSYNTHESIS                                                      | 10 | 0.345 | 0.818 | 0.727 | 0.944 | 1.000 | 280  |
| REACTOME_REACTIONS_SPECIFIC_TO_THE_COMPLEX_N_GLYCAN_SYNTHESIS_PATHWAY                   | 5  | 0.418 | 0.817 | 0.694 | 0.945 | 1.000 | 2451 |
| REACTOME_TP53_REGULATES_TRANSCRIPTION_OF_DEATH_RECEPTORS_AND_LIGANDS                    | 10 | 0.348 | 0.815 | 0.702 | 0.946 | 1.000 | 1526 |
| REACTOME_PHOSPHORYLATION_OF_THE_APC_COMPLEX                                             | 20 | 0.280 | 0.814 | 0.718 | 0.947 | 1.000 | 3550 |
| REACTOME_REGULATION_OF_PITEN_GENE_TRANSCRIPTION                                         | 60 | 0.223 | 0.814 | 0.802 | 0.947 | 1.000 | 1263 |
| REACTOME_FGFR3_LIGAND_BINDING_AND_ACTIVATION                                            | 4  | 0.449 | 0.813 | 0.702 | 0.946 | 1.000 | 1136 |
| REACTOME_SIGNALING_BY_CYTOSOLIC_FGFR1_FUSION_MUTANTS                                    | 18 | 0.288 | 0.813 | 0.710 | 0.946 | 1.000 | 4894 |
| REACTOME_INTERFERON_ALPHA_BETA_SIGNALING                                                | 47 | 0.231 | 0.809 | 0.793 | 0.950 | 1.000 | 1175 |
| REACTOME_SIGNALING_BY_NOTCH1                                                            | 66 | 0.218 | 0.808 | 0.828 | 0.951 | 1.000 | 3349 |
| REACTOME_CROSS_PRESENTATION_OF_SOLUBLE_EXOGENOUS_ANTIGENS_ENDOSOMES                     | 45 | 0.234 | 0.807 | 0.815 | 0.952 | 1.000 | 4312 |
| REACTOME_DISASSEMBLY_OF_THE_DESTRUCTION_COMPLEX_AND_RECRUITMENT_OF_AXIN_TO_THE_MEMBRANE | 26 | 0.265 | 0.807 | 0.751 | 0.951 | 1.000 | 629  |
| REACTOME_TP53_REGULATES_TRANSCRIPTION_OF_CELL_CYCLE_GENES                               | 48 | 0.227 | 0.807 | 0.789 | 0.950 | 1.000 | 1282 |
| REACTOME_RNA_POLYMERASE_II_TRANSCRIPTION_TERMINATION                                    | 63 | 0.219 | 0.807 | 0.791 | 0.949 | 1.000 | 4896 |
| REACTOME_GLUCAGON_SIGNALING_IN_METABOLIC_REGULATION                                     | 16 | 0.295 | 0.806 | 0.727 | 0.949 | 1.000 | 2182 |
| REACTOME_CATION_COUPLED_CHLORIDE_COTRANSPORTERS                                         | 4  | 0.449 | 0.804 | 0.715 | 0.951 | 1.000 | 2994 |

|                                                                                                        |     |       |       |       |       |       |      |
|--------------------------------------------------------------------------------------------------------|-----|-------|-------|-------|-------|-------|------|
| REACTOME_GLUCONEOGENESIS                                                                               | 25  | 0.268 | 0.803 | 0.771 | 0.952 | 1.000 | 2706 |
| REACTOME_LATE_ENDOSOMAL_MICROAUTOPHAGY                                                                 | 30  | 0.257 | 0.801 | 0.784 | 0.954 | 1.000 | 2703 |
| REACTOME_PI_3K_CASCADE_FGFR1                                                                           | 8   | 0.359 | 0.800 | 0.741 | 0.954 | 1.000 | 720  |
| REACTOME_GABA_SYNTHESIS_RELEASE_REUPTAKE_AND_DEGRADATION                                               | 10  | 0.341 | 0.800 | 0.739 | 0.954 | 1.000 | 1678 |
| REACTOME_CELLULAR_HEXOSE_TRANSPORT                                                                     | 12  | 0.323 | 0.800 | 0.715 | 0.953 | 1.000 | 3564 |
| REACTOME_ANTIVIRAL_MECHANISM_BY_IFN_STIMULATED_GENES                                                   | 74  | 0.210 | 0.797 | 0.835 | 0.956 | 1.000 | 3779 |
| REACTOME_DNA_DAMAGE_RECOGNITION_IN_GG_NER                                                              | 37  | 0.240 | 0.795 | 0.809 | 0.959 | 1.000 | 3779 |
| REACTOME_CD209_DC_SIGNALING                                                                            | 18  | 0.288 | 0.795 | 0.756 | 0.958 | 1.000 | 3953 |
| REACTOME_TCF_DEPENDENT_SIGNALING_IN_RESPONSE_TO_WNT                                                    | 150 | 0.188 | 0.793 | 0.916 | 0.960 | 1.000 | 3985 |
| REACTOME_KILLING_MECHANISMS                                                                            | 9   | 0.342 | 0.791 | 0.738 | 0.961 | 1.000 | 2378 |
| REACTOME_CYCLIN_D_ASSOCIATED_EVENTS_IN_G1                                                              | 46  | 0.229 | 0.789 | 0.826 | 0.963 | 1.000 | 3480 |
| REACTOME_REGULATION_OF_MCEP2_EXPRESSION_AND_ACTIVITY                                                   | 29  | 0.258 | 0.788 | 0.790 | 0.964 | 1.000 | 1249 |
| REACTOME_FORMATION_OF_RNA_POL_II_ELONGATION_COMPLEX                                                    | 56  | 0.220 | 0.788 | 0.804 | 0.963 | 1.000 | 2789 |
| REACTOME_ROLE_OF_SECOND_MESSENGERS_IN_NETRIN_1_SIGNALING                                               | 3   | 0.479 | 0.787 | 0.764 | 0.963 | 1.000 | 2494 |
| REACTOME_PROTEIN_METHYLATION                                                                           | 16  | 0.291 | 0.787 | 0.765 | 0.962 | 1.000 | 2175 |
| REACTOME_SEROTONIN_NEUROTRANSMITTER_RELEASE_CYCLE                                                      | 11  | 0.326 | 0.784 | 0.726 | 0.965 | 1.000 | 1496 |
| REACTOME_INTERLEUKIN_15_SIGNALING                                                                      | 10  | 0.326 | 0.781 | 0.754 | 0.970 | 1.000 | 3707 |
| REACTOME_KERATAN_SULFATE_KERATIN_METABOLISM                                                            | 23  | 0.261 | 0.781 | 0.790 | 0.969 | 1.000 | 3610 |
| REACTOME_ACTIVATED_PKN1_STIMULATES_TRANSCRIPTION_OF_AR_ANDROGEN_RECEPTOR REGULATED_GENES_KLK2_AND_KLK3 | 14  | 0.293 | 0.779 | 0.737 | 0.970 | 1.000 | 4687 |
| REACTOME_ADP_SIGNALLING_THROUGH_P2Y_PURINOCEPTOR_12                                                    | 10  | 0.323 | 0.778 | 0.724 | 0.970 | 1.000 | 2180 |
| REACTOME_SUMO_IS_CONJUGATED_TO_E1_UBA2_SAE1                                                            | 5   | 0.397 | 0.773 | 0.732 | 0.977 | 1.000 | 4031 |
| REACTOME_PEROXISOMAL_PROTEIN_IMPORT                                                                    | 55  | 0.215 | 0.772 | 0.858 | 0.977 | 1.000 | 1569 |

|                                                                                                                                      |     |       |       |       |       |       |      |
|--------------------------------------------------------------------------------------------------------------------------------------|-----|-------|-------|-------|-------|-------|------|
| REACTOME_TRANSCRIPTIONAL_REGULATION_BY_SMALL_RNAS                                                                                    | 57  | 0.212 | 0.766 | 0.868 | 0.985 | 1.000 | 2672 |
| REACTOME_DISEASES_ASSOCIATED_WITH_N_GLYCOSYLATION_OF_PROTEINS                                                                        | 17  | 0.274 | 0.766 | 0.788 | 0.984 | 1.000 | 1559 |
| REACTOME_RNA_POLYMERASE_I_TRANSCRIPTION_TERMINATION                                                                                  | 30  | 0.242 | 0.766 | 0.823 | 0.983 | 1.000 | 2549 |
| REACTOME_MAPK1_ERK2_ACTIVATION                                                                                                       | 8   | 0.340 | 0.766 | 0.761 | 0.982 | 1.000 | 5263 |
| REACTOME_SIGNALING_BY_HIPPO                                                                                                          | 19  | 0.274 | 0.765 | 0.814 | 0.982 | 1.000 | 4364 |
| REACTOME_PROTEIN_LOCALIZATION                                                                                                        | 151 | 0.180 | 0.764 | 0.941 | 0.982 | 1.000 | 2951 |
| REACTOME_MASTL_FACILITATES_MITOTIC_PROGRESSION                                                                                       | 10  | 0.322 | 0.758 | 0.772 | 0.989 | 1.000 | 3550 |
| REACTOME_APOPTOTIC_CLEAVAGE_OF_CELL_ADHESION_PROTEINS                                                                                | 8   | 0.338 | 0.757 | 0.764 | 0.989 | 1.000 | 3597 |
| REACTOME_PRE_NOTCH_EXPRESSION_AND_PROCESSING                                                                                         | 57  | 0.211 | 0.757 | 0.897 | 0.988 | 1.000 | 3326 |
| REACTOME_FORMATION_OF_XYLULOSE_5_PHOSPHATE                                                                                           | 5   | 0.386 | 0.757 | 0.744 | 0.988 | 1.000 | 577  |
| REACTOME_INHIBITION_OF_THE_PROTEOLYTIC_ACTIVITY_OF_APC_C_REQUIRED_FOR_THE_ONSET_OF_ANAPHASE_BY_MITOTIC_SPINDLE_CHECKPOINT_COMPONENTS | 21  | 0.259 | 0.756 | 0.827 | 0.988 | 1.000 | 3290 |
| REACTOME_PROGRAMMED_CELL_DEATH                                                                                                       | 163 | 0.176 | 0.756 | 0.970 | 0.987 | 1.000 | 1851 |
| REACTOME_ACYL_CHAIN_REMODELING_OF_PS                                                                                                 | 11  | 0.306 | 0.755 | 0.781 | 0.987 | 1.000 | 2769 |
| REACTOME_NEGATIVE_REGULATION_OF_NOTCH4_SIGNALING                                                                                     | 54  | 0.208 | 0.753 | 0.888 | 0.989 | 1.000 | 4312 |
| REACTOME_SYNTHESIS_OF_PROSTAGLANDINS_PG_AND_THROMBOXANES_TX                                                                          | 9   | 0.322 | 0.748 | 0.784 | 0.995 | 1.000 | 1097 |
| REACTOME_RNA_POLYMERASE_I_TRANSCRIPTION                                                                                              | 60  | 0.203 | 0.746 | 0.894 | 0.996 | 1.000 | 3350 |
| REACTOME_SHC_RELATED_EVENTS_TRIGGERED_BY_IGF1R                                                                                       | 7   | 0.348 | 0.745 | 0.801 | 0.996 | 1.000 | 4574 |
| REACTOME_RESOLUTION_OF_SISTER_CHROMATID_COHESION                                                                                     | 116 | 0.182 | 0.745 | 0.953 | 0.995 | 1.000 | 2493 |
| REACTOME_RECOGNITION_AND_ASSOCIATION_OF_DNA_GLYCOSYLASE_WITH_SITE_CONTAINING_AN_AFFECTED_PURINE                                      | 19  | 0.262 | 0.745 | 0.849 | 0.994 | 1.000 | 3185 |
| REACTOME_AMINE_LIGAND_BINDING_RECEPTORS                                                                                              | 6   | 0.360 | 0.745 | 0.806 | 0.993 | 1.000 | 320  |
| REACTOME_FRS_MEDIATED_FGF_R3_SIGNALING                                                                                               | 11  | 0.307 | 0.744 | 0.794 | 0.993 | 1.000 | 1136 |

|                                                      |    |       |       |       |       |       |      |
|------------------------------------------------------|----|-------|-------|-------|-------|-------|------|
| REACTOME_P75_NTR_RECEPTOR_MEDIATED_SIGNALLING        | 87 | 0.191 | 0.744 | 0.929 | 0.992 | 1.000 | 2841 |
| REACTOME_DEFECTS_IN_BIOTIN_BTN_METABOLISM            | 8  | 0.339 | 0.743 | 0.776 | 0.992 | 1.000 | 2489 |
| REACTOME_TYSND1_CLEAVES_PEROXISOMAL_PROTEINS         | 7  | 0.346 | 0.743 | 0.770 | 0.991 | 1.000 | 8318 |
| REACTOME_INTERFERON_GAMMA_SIGNALING                  | 57 | 0.205 | 0.742 | 0.908 | 0.990 | 1.000 | 3834 |
| REACTOME_SIGNALING_BY_FGFR1_IN_DISEASE               | 28 | 0.239 | 0.742 | 0.864 | 0.990 | 1.000 | 4894 |
| REACTOME_SIGNAL_AMPLIFICATION                        | 16 | 0.268 | 0.741 | 0.817 | 0.989 | 1.000 | 2180 |
| REACTOME_MITOTIC_PROPHASE                            | 91 | 0.187 | 0.741 | 0.937 | 0.988 | 1.000 | 2672 |
| REACTOME_CRISTAE_FORMATION                           | 29 | 0.239 | 0.741 | 0.856 | 0.988 | 1.000 | 5312 |
| REACTOME_SYNTHESIS_OF_PC                             | 23 | 0.251 | 0.741 | 0.846 | 0.987 | 1.000 | 1217 |
| REACTOME_AKT_PHOSPHORYLATED_TARGETS_IN_THE_CYTOSOL   | 14 | 0.278 | 0.740 | 0.793 | 0.987 | 1.000 | 4634 |
| REACTOME_LDL_CLEARANCE                               | 18 | 0.264 | 0.740 | 0.835 | 0.986 | 1.000 | 817  |
| REACTOME_ADP_SIGNALLING_THROUGH_P2Y_PURINOCEPTOR_1   | 11 | 0.303 | 0.739 | 0.787 | 0.985 | 1.000 | 3490 |
| REACTOME_TRANSCRIPTION_OF_THE_HIV_GENOME             | 66 | 0.201 | 0.739 | 0.930 | 0.985 | 1.000 | 3028 |
| REACTOME_SCF_SKP2_MEDIATED_DEGRADATION_OF_P27_P21    | 59 | 0.199 | 0.737 | 0.908 | 0.985 | 1.000 | 4312 |
| REACTOME_METABOLISM_OF_NUCLEOTIDES                   | 84 | 0.190 | 0.737 | 0.929 | 0.985 | 1.000 | 2691 |
| REACTOME_G1_S_DNA_DAMAGE_CHECKPOINTS                 | 65 | 0.199 | 0.737 | 0.937 | 0.984 | 1.000 | 4312 |
| REACTOME_REGULATION_OF_RUNX2_EXPRESSION_AND_ACTIVITY | 66 | 0.196 | 0.736 | 0.918 | 0.983 | 1.000 | 4312 |
| REACTOME_Glutamate_Neurotransmitter_Release_Cycle    | 15 | 0.276 | 0.735 | 0.825 | 0.984 | 1.000 | 1496 |
| REACTOME_TRANSLATION_OF_STRUCTURAL_PROTEINS          | 25 | 0.246 | 0.734 | 0.866 | 0.984 | 1.000 | 3303 |
| REACTOME_DOWNSTREAM_SIGNALLING_OF_ACTIVATED_FGFR1    | 15 | 0.272 | 0.734 | 0.831 | 0.983 | 1.000 | 816  |
| REACTOME_GENOME_REPLICATION_AND_TRANSCRIPTION        | 6  | 0.359 | 0.732 | 0.777 | 0.985 | 1.000 | 3208 |
| REACTOME_HDACS_DEACETYLATE_HISTONES                  | 38 | 0.217 | 0.731 | 0.884 | 0.984 | 1.000 | 4605 |
| REACTOME_FGFR2_ALTERNATIVE_SPLICING                  | 26 | 0.238 | 0.731 | 0.878 | 0.983 | 1.000 | 3383 |
| REACTOME_DCC_MEDIATED_ATTRACTIVE_SIGNALING           | 12 | 0.294 | 0.730 | 0.822 | 0.984 | 1.000 | 2765 |
| REACTOME_CONSTITUTIVE_SIGNALLING_BY_EGFRVIII         | 12 | 0.285 | 0.727 | 0.815 | 0.986 | 1.000 | 2078 |
| REACTOME_TRANSCRIPTIONAL_REGULATION_BY_MECP2         | 46 | 0.211 | 0.724 | 0.898 | 0.988 | 1.000 | 1249 |

|                                                                                                       |    |       |       |       |       |       |      |
|-------------------------------------------------------------------------------------------------------|----|-------|-------|-------|-------|-------|------|
| REACTOME_LIPOPHAGY                                                                                    | 8  | 0.327 | 0.723 | 0.804 | 0.988 | 1.000 | 2017 |
| REACTOME_SIGNALING_BY_NOT<br>CH3                                                                      | 40 | 0.217 | 0.723 | 0.906 | 0.987 | 1.000 | 2775 |
| REACTOME_DEGRADATION_OF_<br>DVL                                                                       | 53 | 0.201 | 0.723 | 0.935 | 0.986 | 1.000 | 4312 |
| REACTOME_TNFR2_NON_CANO<br>NICAL_NF_KB_PATHWAY                                                        | 76 | 0.188 | 0.723 | 0.956 | 0.985 | 1.000 | 4324 |
| REACTOME_LTC4_CYSLTR_MEDI<br>ATED_IL4_PRODUCTION                                                      | 2  | 0.475 | 0.721 | 0.823 | 0.986 | 1.000 | 3780 |
| REACTOME_SENSING_OF_DNA_<br>DOUBLE_STRAND_BREAKS                                                      | 6  | 0.349 | 0.718 | 0.812 | 0.988 | 1.000 | 4402 |
| REACTOME_ASSOCIATION_OF_T<br>RIC_CCT_WITH_TARGET_PROTEI<br>NS_DURING_BIOSYNTHESIS                     | 35 | 0.217 | 0.718 | 0.908 | 0.988 | 1.000 | 1271 |
| REACTOME_SMALL_INTERFERIN<br>G_RNA_SIRNA_BIOGENESIS                                                   | 9  | 0.311 | 0.713 | 0.815 | 0.991 | 1.000 | 1991 |
| REACTOME_THE_RETINOID_CYC<br>LE_IN_CONES_DAYLIGHT_VISION                                              | 1  | 0.536 | 0.709 | 0.913 | 0.995 | 1.000 | 5903 |
| REACTOME_LOSS_OF_MECP2_BI<br>NDING_ABILITY_TO_THE_NCOR_<br>SMRT_COMPLEX                               | 7  | 0.334 | 0.709 | 0.804 | 0.994 | 1.000 | 8463 |
| REACTOME_RNA_POLYMERASE_<br>I_PROMOTER_ESCAPE                                                         | 40 | 0.210 | 0.706 | 0.894 | 0.996 | 1.000 | 4944 |
| REACTOME_PYRUVATE_METAB<br>OLISM                                                                      | 26 | 0.231 | 0.706 | 0.868 | 0.995 | 1.000 | 4247 |
| REACTOME_CONVERSION_FRO<br>M_APC_C_CDC20_TO_APC_C_C<br>DH1_IN_LATE_ANAPHASE                           | 20 | 0.246 | 0.704 | 0.875 | 0.996 | 1.000 | 3142 |
| REACTOME_DOWNREGULATION<br>_OF_ERBB4_SIGNALING                                                        | 8  | 0.317 | 0.703 | 0.846 | 0.996 | 1.000 | 1569 |
| REACTOME_DAP12_SIGNALING                                                                              | 21 | 0.240 | 0.703 | 0.889 | 0.995 | 1.000 | 816  |
| REACTOME_DEGRADATION_OF_<br>AXIN                                                                      | 53 | 0.195 | 0.700 | 0.947 | 0.997 | 1.000 | 4312 |
| REACTOME_DEACTIVATION_OF_<br>THE_BETA_CATENIN_TRANSACTI<br>VATING_COMPLEX                             | 35 | 0.214 | 0.700 | 0.905 | 0.996 | 1.000 | 3779 |
| REACTOME_MICRORNA_MIRNA<br>_BIOGENESIS                                                                | 24 | 0.233 | 0.700 | 0.894 | 0.995 | 1.000 | 2357 |
| REACTOME_ANTIGEN_ACTIVATE<br>S_B_CELL_RECEPTOR_BCR_LEAD<br>ING_TO_GENERATION_OF_SECO<br>ND_MESSENGERS | 22 | 0.237 | 0.698 | 0.873 | 0.995 | 1.000 | 3050 |
| REACTOME_RECYCLING_OF_BILE<br>_ACIDS_AND_SALTS                                                        | 8  | 0.319 | 0.697 | 0.833 | 0.996 | 1.000 | 1886 |
| REACTOME_TRANS_GOLGI_NET<br>WORK_VESICLE_BUDDING                                                      | 68 | 0.184 | 0.697 | 0.964 | 0.995 | 1.000 | 3171 |
| REACTOME_BBSOME_MEDIATE<br>D_CARGO_TARGETING_TO_CILI<br>UM                                            | 20 | 0.242 | 0.695 | 0.885 | 0.995 | 1.000 | 1347 |
| REACTOME_RUNX1_INTERACTS_<br>WITH_CO_FACTORS_WHOSE_PR                                                 | 35 | 0.213 | 0.695 | 0.909 | 0.994 | 1.000 | 2129 |

|                                                                               |     |       |       |       |       |       |      |
|-------------------------------------------------------------------------------|-----|-------|-------|-------|-------|-------|------|
| ECISE_EFFECT_ON_RUNX1_TARGETS_IS_NOT_KNOWN                                    |     |       |       |       |       |       |      |
| REACTOME_SYNTHESIS_SECRETION_AND_DEACYLATION_OF_GHERLIN                       | 6   | 0.337 | 0.694 | 0.824 | 0.994 | 1.000 | 3865 |
| REACTOME_DAP12_INTERACTIONS                                                   | 24  | 0.231 | 0.691 | 0.881 | 0.996 | 1.000 | 816  |
| REACTOME_CLASS_I_MHC_MEDIATED_ANTIGEN_PROCESSING_PRESENTATION                 | 319 | 0.150 | 0.691 | 1.000 | 0.995 | 1.000 | 4009 |
| REACTOME_REGULATION_OF_PTEN_LOCALIZATION                                      | 9   | 0.296 | 0.690 | 0.845 | 0.995 | 1.000 | 1569 |
| REACTOME_SYNTHESIS_OF_VERY_LONG_CHAIN_FATTY_ACYL_COAS                         | 15  | 0.260 | 0.690 | 0.871 | 0.994 | 1.000 | 336  |
| REACTOME_MRNA_SPLICING_MINOR_PATHWAY                                          | 52  | 0.195 | 0.688 | 0.939 | 0.994 | 1.000 | 4484 |
| REACTOME_PASSIVE_TRANSPORT_BY_AQUAPORINS                                      | 4   | 0.365 | 0.686 | 0.826 | 0.995 | 1.000 | 2333 |
| REACTOME_HIV_TRANSCRIPTION_INITIATION                                         | 44  | 0.199 | 0.686 | 0.950 | 0.994 | 1.000 | 3028 |
| REACTOME_BIOSYNTHESIS_OF_EPA_DERIVED_SPMS                                     | 2   | 0.459 | 0.685 | 0.864 | 0.994 | 1.000 | 6876 |
| REACTOME_RRNA_PROCESSING                                                      | 197 | 0.156 | 0.684 | 0.992 | 0.994 | 1.000 | 4028 |
| REACTOME_JOSEPHIN_DOMAIN_DUBS                                                 | 10  | 0.293 | 0.683 | 0.877 | 0.994 | 1.000 | 1569 |
| REACTOME_VIRAL_MESSENGER_RNA_SYNTHESIS                                        | 44  | 0.199 | 0.681 | 0.939 | 0.994 | 1.000 | 2493 |
| REACTOME_FORMATION_OF_TCNER_PRE_INCISION_COMPLEX                              | 52  | 0.194 | 0.680 | 0.952 | 0.994 | 1.000 | 2789 |
| REACTOME_NUCLEOBASE_CATABOLISM                                                | 25  | 0.224 | 0.678 | 0.905 | 0.995 | 1.000 | 3102 |
| REACTOME_INOSITOL_PHOSPHATE_METABOLISM                                        | 36  | 0.201 | 0.674 | 0.919 | 0.997 | 1.000 | 3670 |
| REACTOME_NECTIN_NECL_TRANS_HETERODIMERIZATION                                 | 4   | 0.368 | 0.674 | 0.838 | 0.996 | 1.000 | 683  |
| REACTOME_MRNA_SPLICING                                                        | 186 | 0.154 | 0.671 | 1.000 | 0.998 | 1.000 | 3858 |
| REACTOME_MITOCHONDRIAL_BIOGENESIS                                             | 87  | 0.172 | 0.671 | 0.984 | 0.997 | 1.000 | 4502 |
| REACTOME_METALLOPROTEASE_DUBS                                                 | 21  | 0.230 | 0.671 | 0.918 | 0.996 | 1.000 | 2866 |
| REACTOME_TP53_REGULATES_TRANSCRIPTION_OF_DNA_REPAIR_GENES                     | 60  | 0.181 | 0.670 | 0.974 | 0.996 | 1.000 | 2991 |
| REACTOME_PRC2_METHYLATES_HISTONES_AND_DNA                                     | 23  | 0.226 | 0.666 | 0.926 | 0.998 | 1.000 | 52   |
| REACTOME_SLBP_DEPENDENT_PROCESSING_OF_REPLICATION_DEPENDENT_HISTONE_PRE_MRNAS | 11  | 0.273 | 0.665 | 0.872 | 0.998 | 1.000 | 5002 |
| REACTOME_CITRIC_ACID_CYCLE_TCA_CYCLE                                          | 22  | 0.230 | 0.664 | 0.912 | 0.997 | 1.000 | 1823 |

|                                                                                              |     |       |       |       |       |       |      |
|----------------------------------------------------------------------------------------------|-----|-------|-------|-------|-------|-------|------|
| REACTOME_REGULATION_OF_IF<br>NA_SIGNALING                                                    | 12  | 0.271 | 0.663 | 0.888 | 0.997 | 1.000 | 2842 |
| REACTOME_NR1H2_NR1H3_REG<br>ULATE_GENE_EXPRESSION_TO_<br>CONTROL_BILE_ACID_HOMEOST<br>ASIS   | 7   | 0.320 | 0.662 | 0.880 | 0.997 | 1.000 | 8641 |
| REACTOME_ERYTHROPOIETIN_A<br>CTIVATES_STAT5                                                  | 6   | 0.328 | 0.661 | 0.874 | 0.997 | 1.000 | 3480 |
| REACTOME_SIGNALING_BY_NTR<br>K2_TRKB_                                                        | 21  | 0.226 | 0.660 | 0.907 | 0.996 | 1.000 | 2378 |
| REACTOME_ZINC_EFFLUX_AND_<br>COMPARTMENTALIZATION_BY_T<br>HE_SLC30_FAMILY                    | 6   | 0.323 | 0.659 | 0.880 | 0.996 | 1.000 | 3706 |
| REACTOME_RNA_POLYMERASE_<br>II_TRANSCRIBES_SNRNA_GENES                                       | 74  | 0.174 | 0.659 | 0.978 | 0.995 | 1.000 | 2559 |
| REACTOME_CLEC7A_DECTIN_1_I<br>NDUCES_NFAT_ACTIVATION                                         | 11  | 0.267 | 0.655 | 0.894 | 0.997 | 1.000 | 1713 |
| REACTOME_PTEN_REGULATION<br>REACTOME_REGULATION_OF_T<br>P53_ACTIVITY_THROUGH_ACETY<br>LATION | 135 | 0.158 | 0.655 | 0.994 | 0.996 | 1.000 | 4312 |
| REACTOME_PYRUVATE_METAB<br>OLISM_AND_CITRIC_ACID_TCA_<br>CYCLE                               | 30  | 0.208 | 0.654 | 0.944 | 0.995 | 1.000 | 3716 |
| REACTOME_INFLAMMASOMES                                                                       | 49  | 0.188 | 0.653 | 0.951 | 0.995 | 1.000 | 2897 |
| REACTOME_CALCITONIN_LIKE_LI<br>GAND_RECEPTORS                                                | 12  | 0.270 | 0.652 | 0.917 | 0.995 | 1.000 | 2831 |
| REACTOME_CALCITONIN_LIKE_LI<br>GAND_RECEPTORS                                                | 3   | 0.385 | 0.651 | 0.878 | 0.995 | 1.000 | 4036 |
| REACTOME_FBXW7_MUTANTS_<br>AND_NOTCH1_IN_CANCER                                              | 5   | 0.328 | 0.650 | 0.875 | 0.995 | 1.000 | 2850 |
| REACTOME_TRANSCRIPTIONAL_<br>REGULATION_OF_WHITE_ADIPO<br>CYTE_DIFFERENTIATION               | 73  | 0.173 | 0.645 | 0.992 | 0.997 | 1.000 | 762  |
| REACTOME_DNA_DAMAGE_REV<br>ERSAL                                                             | 7   | 0.300 | 0.645 | 0.888 | 0.996 | 1.000 | 4294 |
| REACTOME_ALPHA_OXIDATION_<br>OF_PHYTANATE                                                    | 6   | 0.309 | 0.645 | 0.870 | 0.995 | 1.000 | 2638 |
| REACTOME_PROCESSING_OF_C<br>APPED_INTRON_CONTAINING_P<br>RE_MRNA                             | 236 | 0.143 | 0.644 | 1.000 | 0.994 | 1.000 | 3796 |
| REACTOME_TRANSPORT_OF_M<br>ATURE_TRANSCRIPT_TO_CYTOPL<br>ASM                                 | 79  | 0.167 | 0.639 | 0.988 | 0.997 | 1.000 | 3768 |
| REACTOME_TRANSCRIPTIONAL_<br>ACTIVATION_OF_MITOCHONDRI<br>AL_BIOGENESIS                      | 51  | 0.179 | 0.639 | 0.970 | 0.996 | 1.000 | 3006 |
| REACTOME_METHYLATION                                                                         | 10  | 0.264 | 0.631 | 0.919 | 1.000 | 1.000 | 3829 |
| REACTOME_ACTIVATED_NTRK2_<br>SIGNALS_THROUGH_RAS                                             | 7   | 0.297 | 0.630 | 0.901 | 1.000 | 1.000 | 4574 |
| REACTOME_SARS_COV_INFECTI<br>ONS                                                             | 74  | 0.166 | 0.628 | 0.995 | 1.000 | 1.000 | 2713 |

|                                                                                                                   |     |       |       |       |       |       |      |
|-------------------------------------------------------------------------------------------------------------------|-----|-------|-------|-------|-------|-------|------|
| REACTOME_REGULATION_OF_MRNA_STABILITY_BY_PROTEINS_THAT_BIND_AU_RICH_ELEMENTS                                      | 85  | 0.159 | 0.622 | 0.992 | 1.000 | 1.000 | 4312 |
| REACTOME_LYSINE_CATABOLISM                                                                                        | 10  | 0.267 | 0.621 | 0.937 | 1.000 | 1.000 | 537  |
| REACTOME_SIGNALING_BY_NOTCH4                                                                                      | 79  | 0.161 | 0.617 | 1.000 | 1.000 | 1.000 | 4312 |
| REACTOME_APC_C_CDH1_MEDIATED_DEGRADATION_OF_CDC20_AND_OTHER_APC_C_CDH1_TARGETED_PROTEINS_IN_LATE_MITOSIS_EARLY_G1 | 72  | 0.161 | 0.617 | 0.995 | 1.000 | 1.000 | 4312 |
| REACTOME_MITOCHONDRIAL_PROTEIN_IMPORT                                                                             | 62  | 0.169 | 0.614 | 0.987 | 1.000 | 1.000 | 3138 |
| REACTOME_RUNX1_REGULATES_ESTROGEN_RECEPTOR_MEDIATED_TRANSCRIPTION                                                 | 5   | 0.312 | 0.612 | 0.906 | 1.000 | 1.000 | 1908 |
| REACTOME_MET_RECEPTOR_RECYCLING                                                                                   | 7   | 0.289 | 0.612 | 0.932 | 1.000 | 1.000 | 5052 |
| REACTOME_NS1_MEDIATED_EFFECTS_ON_HOST_PATHWAYS                                                                    | 40  | 0.180 | 0.611 | 0.980 | 1.000 | 1.000 | 2493 |
| REACTOME_APC_C_MEDIATED_DEGRADATION_OF_CELL_CYCLE_PROTEINS                                                        | 85  | 0.155 | 0.608 | 0.998 | 1.000 | 1.000 | 4312 |
| REACTOME_TRANSPORT_OF_THE_SLBP_DEPENDANT_MATURE_MRNA                                                              | 36  | 0.179 | 0.604 | 0.969 | 1.000 | 1.000 | 2493 |
| REACTOME_ANTIGEN_PRESENTATION_FOLDING_ASSEMBLY_AND_PEPTIDE_LOADING_OF_CLASS_I_MHC                                 | 24  | 0.198 | 0.603 | 0.971 | 1.000 | 1.000 | 2229 |
| REACTOME_MITOTIC_METAPHASE_AND_ANAPHASE                                                                           | 224 | 0.135 | 0.600 | 1.000 | 1.000 | 1.000 | 3611 |
| REACTOME_ERYTHROPOIETIN_ACTIVATES_PHOSPHOLIPASE_C_GAMMA_PLCG                                                      | 6   | 0.287 | 0.598 | 0.911 | 1.000 | 1.000 | 3480 |
| REACTOME_SIALIC_ACID_METABOLISM                                                                                   | 20  | 0.209 | 0.597 | 0.942 | 1.000 | 1.000 | 2628 |
| REACTOME_SYNTHESIS_OF_LEUKOTRIENES_LT_AND_EOXINS_EX                                                               | 6   | 0.285 | 0.594 | 0.918 | 1.000 | 1.000 | 1445 |
| REACTOME_CYTOSOLIC_TRNA_AMINOACYLATION                                                                            | 23  | 0.200 | 0.592 | 0.961 | 1.000 | 1.000 | 3640 |
| REACTOME_MET_ACTIVATES_PI3K_AKT_SIGNALING                                                                         | 4   | 0.313 | 0.589 | 0.902 | 1.000 | 1.000 | 1771 |
| REACTOME_PRE_NOTCH_PROCESSING_IN_GOLGI                                                                            | 16  | 0.214 | 0.589 | 0.949 | 1.000 | 1.000 | 3326 |
| REACTOME_SEPARATION_OF_SISTER_CHROMATIDS                                                                          | 179 | 0.136 | 0.589 | 1.000 | 1.000 | 1.000 | 2493 |
| REACTOME_SIGNALING_BY_PDGFR_IN_DISEASE                                                                            | 17  | 0.211 | 0.588 | 0.956 | 1.000 | 1.000 | 3322 |

|                                                                                                                           |    |       |       |       |       |       |      |
|---------------------------------------------------------------------------------------------------------------------------|----|-------|-------|-------|-------|-------|------|
| REACTOME_ALPHA_LINOLENIC_OMEGA3_AND_LINOLEIC_OMEGA6_ACID_METABOLISM                                                       | 11 | 0.234 | 0.583 | 0.944 | 1.000 | 1.000 | 4989 |
| REACTOME_TP53_REGULATES_TRANSCRIPTION_OF_ADDITIONAL_CELL_CYCLE_GENES_WHOSE_EXACT_ROLE_IN_THE_P53_PATHWAY_REMAIN_UNCERTAIN | 21 | 0.201 | 0.579 | 0.967 | 1.000 | 1.000 | 3791 |
| REACTOME_SIRT1_NEGATIVELY_REGULATES_RRNA_EXPRESSION                                                                       | 18 | 0.206 | 0.578 | 0.974 | 1.000 | 1.000 | 4817 |
| REACTOME_SODIUM_CALCIIUM_EXCHANGERS                                                                                       | 4  | 0.322 | 0.577 | 0.921 | 1.000 | 1.000 | 8625 |
| REACTOME_PURINE_CATABOLISM                                                                                                | 15 | 0.213 | 0.574 | 0.958 | 1.000 | 1.000 | 361  |
| REACTOME_REGULATION_OF_PTEN_STABILITY_AND_ACTIVITY                                                                        | 66 | 0.155 | 0.573 | 0.997 | 1.000 | 1.000 | 4312 |
| REACTOME_RUNX3_REGULATES_IMMUNE_RESPONSE_AND_CELL_MIGRATION                                                               | 2  | 0.370 | 0.571 | 0.944 | 1.000 | 1.000 | 1908 |
| REACTOME_NA_CL_DEPENDENT_NEUROTRANSMITTER_TRANSPORTERS                                                                    | 2  | 0.373 | 0.569 | 0.944 | 1.000 | 1.000 | 1892 |
| REACTOME_SIGNALING_BY_FGF_R3_FUSIONS_IN_CANCER                                                                            | 9  | 0.244 | 0.567 | 0.934 | 1.000 | 1.000 | 4574 |
| REACTOME_MITOCHONDRIAL_UNCOUPLING                                                                                         | 4  | 0.310 | 0.566 | 0.941 | 0.999 | 1.000 | 4038 |
| REACTOME_ESTROGEN_BIOSYNTHESIS                                                                                            | 3  | 0.337 | 0.565 | 0.951 | 0.999 | 1.000 | 8434 |
| REACTOME_SLC_TRANSPORTER_DISORDERS                                                                                        | 54 | 0.156 | 0.564 | 0.995 | 0.998 | 1.000 | 2493 |
| REACTOME_REGULATION_OF_TP53_ACTIVITY_THROUGH_METHYLATION                                                                  | 19 | 0.199 | 0.559 | 0.976 | 0.999 | 1.000 | 4568 |
| REACTOME_THE_FATTY_ACID_CYCLING_MODEL                                                                                     | 4  | 0.310 | 0.559 | 0.943 | 0.998 | 1.000 | 4038 |
| REACTOME_BASE_EXCISION_REPAIR_AP_SITE_FORMATION                                                                           | 26 | 0.182 | 0.557 | 0.986 | 0.998 | 1.000 | 3185 |
| REACTOME_ABC_FAMILY_PROTEINS_MEDIATED_TRANSPORT                                                                           | 85 | 0.144 | 0.555 | 0.998 | 0.997 | 1.000 | 4312 |
| REACTOME_HCMV_LATE_EVENTS                                                                                                 | 60 | 0.152 | 0.555 | 0.998 | 0.997 | 1.000 | 3295 |
| REACTOME_BETA_OXIDATION_OF_DECANOYL_COA_TO_OCTANOYL_COA_COA                                                               | 6  | 0.271 | 0.553 | 0.960 | 0.996 | 1.000 | 9273 |
| REACTOME_NEF_MEDIATED_CD8_DOWN_REGULATION                                                                                 | 7  | 0.256 | 0.549 | 0.953 | 0.996 | 1.000 | 2576 |
| REACTOME_REGULATION_OF_PYRUVATE_DEHYDROGENASE_PDH_COMPLEX                                                                 | 15 | 0.204 | 0.549 | 0.978 | 0.996 | 1.000 | 4247 |
| REACTOME_SUMOYLATION_OF_RNA_BINDING_PROTEINS                                                                              | 47 | 0.158 | 0.543 | 0.996 | 0.996 | 1.000 | 2720 |

|                                                                                       |    |       |       |       |       |       |       |
|---------------------------------------------------------------------------------------|----|-------|-------|-------|-------|-------|-------|
| REACTOME_B_WICH_COMPLEX_POSITIVELY_REGULATES_RRNA_EXPRESSION                          | 41 | 0.158 | 0.528 | 0.991 | 1.000 | 1.000 | 3796  |
| REACTOME_CREB1_PHOSPHORYLATION_THROUGH_THE_ACTIVATION_OF_ADENYLATE_CYCLASE            | 8  | 0.234 | 0.528 | 0.969 | 0.999 | 1.000 | 910   |
| REACTOME_ERYTHROPOIETIN_ACTIVATES_PHOSPHOINOSITIDE_3_KINASE_PI3K                      | 8  | 0.236 | 0.523 | 0.970 | 0.999 | 1.000 | 3480  |
| REACTOME_ABERRANT_REGULATION_OF_MITOTIC_G1_S_TRANSITION_IN_CANCER_DUE_TO_RB1_DEFECTS  | 16 | 0.194 | 0.522 | 0.980 | 0.998 | 1.000 | 1769  |
| REACTOME_ACTIVATED_NTRK3_SIGNALS_THROUGH_PI3K                                         | 5  | 0.274 | 0.520 | 0.958 | 0.998 | 1.000 | 1814  |
| REACTOME_HDL_ASSEMBLY                                                                 | 5  | 0.260 | 0.505 | 0.967 | 1.000 | 1.000 | 9401  |
| REACTOME_PHOSPHORYLATION_OF_EMI1                                                      | 6  | 0.244 | 0.497 | 0.974 | 1.000 | 1.000 | 9608  |
| REACTOME_BIOTIN_TRANSPORT_AND_METABOLISM                                              | 11 | 0.207 | 0.497 | 0.974 | 1.000 | 1.000 | 2489  |
| REACTOME_NEF_MEDIATED_DOWNREGULATION_OF_MHC_CLASSES_I_COMPLEX_CELL_SURFACE_EXPRESSION | 9  | 0.221 | 0.495 | 0.971 | 0.999 | 1.000 | 4136  |
| REACTOME_SUMOYLATION_OF_IMMUNE_RESPONSE_PROTEINS                                      | 11 | 0.196 | 0.478 | 0.987 | 1.000 | 1.000 | 2498  |
| REACTOME_NEPHRIN_FAMILY_I_INTERACTIONS                                                | 16 | 0.176 | 0.478 | 0.995 | 1.000 | 1.000 | 4350  |
| REACTOME_NUCLEAR_PORE_COMPLEX_NPC_DISASSEMBLY                                         | 36 | 0.143 | 0.470 | 1.000 | 1.000 | 1.000 | 2493  |
| REACTOME_PROCESSING_OF_SMDT1                                                          | 15 | 0.175 | 0.464 | 0.995 | 1.000 | 1.000 | 10485 |
| REACTOME_CONDENSATION_OF_PROPHASE_CHROMOSOMES                                         | 23 | 0.153 | 0.452 | 1.000 | 1.000 | 1.000 | 3550  |
| REACTOME_PI3K_AKT_ACTIVATION                                                          | 7  | 0.205 | 0.438 | 0.992 | 1.000 | 1.000 | 10107 |
| REACTOME_SUMOYLATION_OF_DNA_METHYLATION_PROTEINS                                      | 16 | 0.156 | 0.426 | 1.000 | 1.000 | 1.000 | 4102  |
| REACTOME_ACTIVATION_OF_CASPASES_THROUGH_APOPTOSOME_MEDIATED_CLEAVAGE                  | 6  | 0.203 | 0.412 | 1.000 | 1.000 | 1.000 | 10138 |
| REACTOME_NEGATIVE_EPIGENETIC_REGULATION_OF_RRNA_EXPRESSION                            | 58 | 0.111 | 0.399 | 1.000 | 1.000 | 1.000 | 3548  |
| REACTOME_GALACTOSE_CATABOLISM                                                         | 5  | 0.205 | 0.395 | 1.000 | 0.999 | 1.000 | 4508  |
